# Supplementary material for: Performance of GFN1-xTB for periodic optimization of metal organic frameworks
Source: Royal Society of Chemistry journal article supplement (doi:10.1039/d2cp00184e), 2022-01-01
Supplement: d2cp00184e1.zip [file d2cp00184e1.zip]

## Sheet: lfixed
CoRE Database Refodes	Error	Original CoRE Structure						Fixed lattice optimisation - RMSD Position				Fixed lattice optimisation - RMSD bond length			Fixed lattice optimisation			Error on optimisation process	Step of convergence		Cell parameter Error (%)			RMSD Position				RMSD bond length																CoRE Database Refodes
		GSA (m2/g)	VSA (m2/cm3)					All	MO	Metal	Non M & non MO	All	M-X	Non metal	GSA (m2/g)	VSA (m2/cm3)					a	b	c	All	MO	Metal	Non M & non MO	All	M-X	Non metal	GSA (m2/g)	VSA (m2/cm3)				a	b	c	alpha	beta	gamma	Cell volume (A^3)
00958972.2016.1250260_1436516_clean		0	0					1.19238		1.50034	1.18177	0.0756548	0.0641091	0.24884	0	0					-14.3967	-23.6649	-3.29275	0.782578		1.35136	0.762965	0.287353	0.264255	0.633825	0	0		0		5.84	11.3511	13.8969	103.199	98.6247	95.4394	878.749		00958972.2016.1250260_1436516_clean
00958972.2016.1250260_1436519_clean		0	0			collapse		1.4526		3.46094	1.41797	0.13999	0.0651568	1.26249	0	0					-6.36439	1.31722	-1.25553	0.340709		2.19825	0.308683	0.142557	0.0837384	1.02484	0	0				10.692	18.911	14.9098	90	91.8526	90	3013.13		00958972.2016.1250260_1436519_clean
00958972.2016.1253069_1472494_clean	occupancy	829.928	238.178												NA	NA					-15.9916	-15.1431	-3.04881	0.453658	0.51375	0.312629	0.453267	0.236626	0.350768	0.190353	313.388	60.4955												00958972.2016.1253069_1472494_clean
1499489-acs.cgd.6b01265_1499490_clean	occupancy	1388.91	1570.83												NA	NA															NA	NA												1499489-acs.cgd.6b01265_1499490_clean
ABAVIJ_clean		0	0																		0.186001	0.724563	-3.92092	0.221432	0.141925	0.00684145	0.245642	0.0708744	0.0642794	0.0994526	0	0												ABAVIJ_clean
ABAYIO_clean		1230.64	1296.6																		-2.11049	-2.11049	-2.11049	0.118696	0.086203	0.180213	0.126302	0.0883702	0.0585224	0.153493	1314.73	1299.33												ABAYIO_clean
ABAYOU_clean		1275.36	1302.37					0.191058	0.140127	0.368924	0.193931	0.072796	0.0348673	0.15555	1506.14	1538.03					-2.36424	-2.3755	-2.35749	0.153326	0.133706	0.320569	0.143464	0.0829	0.0545987	0.144648	1374.99	1306.79				26.647	26.647	26.647	90	90	90	18921		ABAYOU_clean
ABEFUL_clean		0	0					0.0655947	0.0157486	0.000217609	0.0713965	0.0444856	0.0480556	0.0016448	0	0					-1.26013	-1.26013	-0.0143323	0.0922232	0.0991208	0.000228212	0.0926834	0.0517038	0.0554261	0.00703633	0	0				15.387	15.387	9.838	90	90	90	2329.24		ABEFUL_clean
ABESUX_clean	Z>86	1344.74	359.278												NA	NA															NA	NA												ABESUX_clean
ABETAE_clean	Z>86	1368.99	370.069												NA	NA															NA	NA												ABETAE_clean
ABETIN_clean		2193.11	3672.12					0.157307		0.00252601	0.160532	0.0622687	0.0618171	0.06814	2155.03	3608.45					1.44532	1.44569	1.89712	0.127903		0.00412106	0.130482	0.0623141	0.0609185	0.0804559	2149.68	3774.48				26.963	26.963	27.537	90	90	90	20019.5		ABETIN_clean
ABEXEM_clean		663.202	376.644					0.583241	0.570201	0.778469	0.572501	0.158751	0.0346069	0.353835	379.653	215.619					-17.4165	-0.948496	-17.4353	0.858246	0.86305	1.10462	0.834525	0.318247	0.203929	0.49789	0	0				11.042	12.135	19.651	90	90	90	2633.13		ABEXEM_clean
ABEXEN_clean		1594.4	2364.27					0.081915	0.0723141	0.162776	0.0817842	0.0520236	0.0499056	0.0590836	1602.69	2376.6					0.237469	0.23468	0.41587	0.0843238	0.0840128	0.194283	0.0808569	0.0542598	0.0492115	0.0710877	1599.66	2393.2				25.098	25.0984	28.446	90	90	119.999	15518.2		ABEXEN_clean
ABEXIQ_clean		597.329	334.152					0.67081	0.622305	0.828165	0.680324	0.0919122	0.032623	0.189739	380.795	213.02																				11.036	12.056	19.561	90	90	90	2602.59		ABEXIQ_clean
ABEXOW_clean		577.796	318.796					0.658819	0.607441	0.804371	0.670735	0.0944855	0.0310353	0.189661	367.937	203.007					-13.0676	-4.05099	-14.439	0.955919	0.918384	1.155	0.956559	0.214703	0.172445	0.278089	0	0				11.008	12.002	19.473	90	90	90	2572.73		ABEXOW_clean
ABEXUC_clean		547.215	296.091					0.66206	0.604605	0.795502	0.677934	0.0893752	0.0313372	0.180578	341.274	184.659					-12.9435	-3.14247	-13.8223	0.941234	0.895217	1.11776	0.947892	0.197227	0.164897	0.248031	0	0				10.989	11.946	19.402	90	90	90	2546.99		ABEXUC_clean
ABEYAJ_clean		529.893	277.954					0.659136	0.59275	0.758713	0.682227	0.0829673	0.031711	0.163513	341.48	179.122					-11.881	-2.41237	-13.0253	0.9019	0.849284	1.0495	0.914229	0.182512	0.151622	0.231052	0	0				10.962	11.868	19.307	90	90	90	2511.78		ABEYAJ_clean
ABEYEN_clean		483.772	250.751					0.659973	0.594792	0.746524	0.68362	0.0810859	0.0314444	0.159094	314.723	163.128					-11.9712	-2.0071	-12.6053	0.896422	0.847943	1.03172	0.907843	0.176612	0.148751	0.220394	0	0				10.943	11.828	19.261	90	90	90	2493.02		ABEYEN_clean
ABEYIR_clean		453.454	230.224					0.649472	0.581323	0.721611	0.675792	0.0802685	0.0333106	0.154059	327.852	166.457					-12.8196	-1.38815	-12.3272	0.914223	0.861818	1.04181	0.928191	0.175264	0.149191	0.216237	0	0				10.934	11.793	19.215	90	90	90	2477.67		ABEYIR_clean
ABIXOZ_clean	metalvsorganic	1413.16	736.978			collapse		6.30468	6.85938	5.40078	5.62666	4.33879	5.04862	4.08067	1379.6	719.479					-3.77094	-7.95801	-18.5373	6.32783	6.6387	5.85073	5.92021	4.33071	4.71159	4.19221	0	0				12.785	12.8313	15.9934	67.3582	67.2222	63.0515	2085.16		ABIXOZ_clean
ABIYIV_clean		329.086	244.382					0.255955	0.233168	0.180946	0.261177	0.0584766	0.0485182	0.107162	0	0					0.518732	-7.58271	-6.5274	0.332986	0.386392	0.240429	0.331068	0.113101	0.111286	0.121974	0	0				11.104	19.883	21.302	90	90	90	4703.07		ABIYIV_clean
ABULOB_clean		826.879	626.798					0.212916	0.217194	0.162353	0.225459	0.028696	0.0305282	0.0262531	751.499	569.657					-15.5943	7.37641	8.05294	0.886409	0.860928	0.56398	1.04554	0.186386	0.189291	0.182514	0	0				8.501	15.365	13.374	90	90	90	1746.88		ABULOB_clean
ABUWOJ_clean		1024.24	884.239					0.478982	0.483694	0.611799	0.464287	0.0632505	0.0463476	0.116072	1065.6	919.99					-0.00275885	-2.71119	-1.75888	0.310398	0.339905	0.428442	0.289742	0.0688436	0.0597672	0.0972075	945.484	780.131				14.499	17.166	18.154	90	90	90	4518.35		ABUWOJ_clean
ACAJIY_clean		0	0					0.11003		0.0187469	0.111478	0.0466624	0.0465264	0.0482943	0	0					-2.82271	-2.82328	-2.2565	0.163323		0.0203752	0.165592	0.0723657	0.0747828	0.043361	0	0				17.508	17.5077	20.789	90	90	120.001	5518.56		ACAJIY_clean
ACAJIZ_clean		829.684	637.494					0.135665	0.120637	0.0346313	0.142379	0.0678694	0.0641429	0.0865015	770.199	591.798					0.331554	-1.94784	-3.82281	0.230715	0.197628	0.079842	0.242516	0.0863335	0.0785379	0.125312	730.443	532.624				25.667	13.076	8.72513	90	95.0696	90	2916.89		ACAJIZ_clean
ACAJOF_clean		994.921	816.371					0.15266	0.118011	0.0592183	0.16176	0.0690863	0.0643707	0.0939504	948.941	778.642					-0.556068	0.124214	0.290061	0.116232	0.104698	0.0321892	0.121337	0.0673273	0.0644854	0.0823123	946.746	775.724				8.677	13.042	28.201	90	90	90	3191.38		ACAJOF_clean
ACAKUM_clean		0	0					1.65764	1.46021	1.48599	1.69386	0.102552	0.0404056	0.506502	695.327	437.243					-16.063	1.65785	-22.7121	1.10031	0.922607	0.947797	1.13284	0.252771	0.22338	0.443808	0	0				10.395	10.779	21.445	90	90	112.058	2226.98		ACAKUM_clean
ACALIB_clean		0	0					1.5126	1.23757	1.03411	1.57052	0.0554911	0.0400892	0.141302	0	0					-14.4071	6.34753	-13.1158	0.721351	0.653577	0.445088	0.740574	0.141377	0.13494	0.17724	0	0				9.749	11.0484	20.485	90	90	108.896	2087.55		ACALIB_clean
ACECIV_ion_b	occupancy	0	0												NA	NA					-7.13829	-11.6881	-7.20167	1.72098	1.68398	1.3173	1.79447	0.32688	0.255379	0.401828	0	0												ACECIV_ion_b
ACIBIY_clean		567.897	327.29					0.202509	0.220541	0.105176	0.20881	0.113497	0.0780122	0.148982	592.85	341.667					-1.97501	-3.1308	-4.34326	0.203913	0.206216	0.102265	0.227023	0.10923	0.0939944	0.124466	0	0				15.205	18.0051	21.4999	71.2094	84.4697	67.1491	5132.16		ACIBIY_clean
ACIBOE_clean		1739.74	1580.23					0.251212	0.265297	0.260037	0.244235	0.0531091	0.0411069	0.0863462	1725.77	1567.56					-1.08838	-1.08662	-1.0872	0.101385	0.121088	0.196601	0.082063	0.0554354	0.0425971	0.0909874	1655.73	1457.08				17.071	17.0716	17.0713	105.828	105.831	117.029	3779.24		ACIBOE_clean
ACMPCD_SL		217.032	125.239					0.635822	0.721485	0.373971	0.634512	0.0895877	0.0621627	0.242711	0	0					-4.4646	-4.4646	-6.86302	0.580815	0.915307	0.414728	0.546173	0.102061	0.0804393	0.222782	107.141	52.263				15.966	15.9659	25.257	128.038	128.038	19.285	1659.87		ACMPCD_SL
ACOCOM_clean	n= 2112	1542.72	4408.68												NA	NA															NA	NA												ACOCOM_clean
ACOCUS_clean	n= 2112	1525.51	4402.72												NA	NA															NA	NA												ACOCUS_clean
ACODAZ_clean	n= 2112	1540.99	4490.81												NA	NA			collapse												NA	NA												ACODAZ_clean
ACODON_clean		1465.66	1275.33					0.127788	0.11691	0.124675	0.130363	0.0613309	0.0542072	0.0930312	1419.74	1235.29					-0.385515	-0.00621573	0.267627	0.125804	0.117439	0.11923	0.127904	0.0617975	0.0546541	0.0935857	1419.6	1233.74				10.557	14.479	23.3158	107.317	90	90	3402.39		ACODON_clean
ACODUT_clean	occupancy	0	0					0.754655	0.267871	0.000251471	0.790685	0.31	0.315659	0.165699	0	0					6.35229	1.93435	-8.17951	0.800909	0.457909	0.00341256	0.828904	0.340395	0.348401	0.136255	0	0				17.06	17.0597	9.238	90	90	120.001	2328.38		ACODUT_clean
ACOGAB_clean		952.032	824.573					0.836176		9.9817e-05	0.845898	0.0914911	0.0654646	0.473213	821.173	711.253					1.82935	0.580592	0.636883	0.23966		9.9817e-05	0.242446	0.0781567	0.0624007	0.309245	942.728	845.605				9.982	16.638	17.0676	100.543	107.003	90	2660.61		ACOGAB_clean
ACOGEF_clean		984.542	781.681					0.777363		0.000263593	0.786399	0.0900799	0.0669175	0.429796	767.153	609.069					3.91111	-0.859286	-0.543633	0.351819		0.000172543	0.355908	0.0883326	0.0684951	0.379283	880.181	721.441				9.846	16.851	17.2545	101.219	106.578	90	2686.65		ACOGEF_clean
ACOLEL_clean		0	0					0.382198	0.417595	0.211121	0.382788	0.079936	0.072569	0.13261	0	0					-2.11599	-2.19596	-2.17372	0.343307	0.418402	0.187352	0.340418	0.09139	0.0848101	0.138436	0	0				17.656	19.4089	20.5039	106.261	90	117.055	5940.1		ACOLEL_clean
ACOLIP_clean		0	0					0.368125	0.162387	0.180591	0.380604	0.0793775	0.0761753	0.121006	595.027	566.984					-1.36423	-0.201025	-2.01659	0.128533	0.122159	0.184079	0.127641	0.0800894	0.0765692	0.125852	0	0				11.567	11.8394	14.227	112.499	90	119.239	1527.9		ACOLIP_clean
ACOLOV_clean		1946.51	2254.44					0.13184	0.242414	0.324166	0.112609	0.0702172	0.0575987	0.156319	1905.23	2206.61					-0.350136	0.654823	-0.843808	0.139663	0.252152	0.302952	0.12108	0.0724944	0.0603592	0.155299	1888.46	2171.85				11.367	24.373	36.5957	97.6853	90	90	10047.7		ACOLOV_clean
ACUBAB_clean	metalvsorganic	977.402	423.22			collapse		7.6514	7.75605	7.56068	7.39626	4.46992	3.93812	4.86876	1017.84	440.696					-16.3094	-13.5419	-34.8067	7.56666	7.76523	7.62588	6.81817	4.43639	4.30639	4.53389	0	0				8.877	8.8775	23.775	90	90	120.002	1622.55		ACUBAB_clean
ACUFEK_clean		2166.29	3872.31					0.0933165	0.0514269	0.0432398	0.101687	0.0586378	0.0601377	0.0479715	2178.49	3894.14					0.717969	0.717666	0.672617	0.0934058	0.0602926	0.063835	0.0996375	0.0569275	0.0566402	0.05897	2163.93	3949.34				32.968	32.9679	32.9759	60.008	60.008	59.9999	25346.5		ACUFEK_clean
ACUJOZ_manual	n= 1278	2196	3162.96												NA	NA					0.160362	0.160148	-8.53131	0.766512	0.8399	0.823522	0.740957	0.110145	0.0785663	0.240172	NA	NA												ACUJOZ_manual
ACUTOI_clean		638.501	371.234					0.502845	0.573644	0.563398	0.479111	0.117905	0.0536531	0.232781	560.476	325.86					-8.01333	0.900579	-9.7679	0.58787	0.592585	0.625546	0.583364	0.162561	0.120657	0.237479	0	0				7.082	20.72	22.878	90	90	90	3357.1		ACUTOI_clean
ADABIS_clean		0	0					0.565441	0.67133	0.355649	0.570273	0.0680346	0.045169	0.143165	0	0																				9.255	9.354	13.8737	109.701	101.757	90	1103.96		ADABIS_clean
ADABUE_clean		0	0					0.287886	0.560696	0.142135	0.281976	0.0734646	0.0468587	0.195851	0	0					3.65933	-3.69865	0.132167	0.23686	0.435886	0.105952	0.233692	0.0737379	0.05376	0.165636	0	0				9.274	9.39	15.0571	108.169	92.5237	90	1244.5		ADABUE_clean
ADARAA_clean	n= 2112	1855.34	2103.71												NA	NA															NA	NA												ADARAA_clean
ADASAB_charged	n= 1088	1657.9	4820.29												NA	NA															NA	NA												ADASAB_charged
ADASEF_clean		1820.69	4179.65					0.257761	0.212414	0.412545	0.253412	0.0704281	0.0674016	0.0818221	1824.22	4187.76					1.31983	1.32113	1.32087	0.157654	0.167912	0.177747	0.154398	0.0668648	0.0644466	0.0759687	1774.28	4236.62				38.459	38.4597	38.4595	60.0001	59.9996	59.9997	40224.5		ADASEF_clean
ADASIJ_clean		2098.9	3335.55					0.205428	0.168633	0.332673	0.206535	0.064213	0.0593588	0.0890234	2110.65	3354.18					1.45651	1.45753	1.45719	0.147435	0.137515	0.145746	0.149734	0.0639555	0.0605071	0.0815806	2101.76	3488.26				29.33	29.3304	29.3302	60	60.0002	60.0005	17841.5		ADASIJ_clean
ADASOP_clean		2122.41	3360.15					0.103072	0.066957	0.238662	0.103565	0.0570052	0.0490847	0.0974875	2111.9	3343.62					0.830984	0.847024	0.846699	0.0881017	0.0578798	0.256319	0.0854723	0.0540989	0.0468475	0.0911618	2108.2	3421.32				29.303	29.303	29.3844	60.0927	60.0927	90	17891.2		ADASOP_clean
ADASUV_clean		2123.38	3393.65					0.293596	0.244176	0.329546	0.303496	0.081599	0.061084	0.17993	2068.13	3305.32					-1.09984	-1.0648	-0.815125	0.202618	0.208799	0.317646	0.194739	0.0827621	0.0643308	0.171105	2067.97	3214.48				29.395	29.395	29.4193	60.0262	60.0262	90	17989		ADASUV_clean
ADATAC_clean		1735.16	5144.73					0.13349	0.233733	0.286663	0.115018	0.058102	0.0512926	0.112577	1749.23	5186.39					0.47806	0.478309	0.478309	0.138465	0.243368	0.305274	0.118917	0.0573631	0.0493073	0.12181	1739.58	5232.19				40.162	40.1626	40.1619	59.9998	60	60.0005	45807.6		ADATAC_clean
ADATEG_manual	n= 1160	1496.95	6269.26					0.272025	0.306537	0.216728	0.270115	0.0262654	0.00896181	0.179741	1492.62	6251.07					0.711806	0.678617	0.698819	0.213825	0.240083	0.185249	0.21206	0.0318605	0.0155871	0.176199	1468.1	6284.62				48.51	48.5101	48.5107	60.0001	60.0005	60.0001	80721.3		ADATEG_manual
ADATIK_clean		1719.17	4553.17																		1.15937	1.15937	1.08912	0.135427	0.148285	0.141391	0.133172	0.0468123	0.0433596	0.063385	1699.88	4654.04												ADATIK_clean
ADATOQ_clean		2091.1	3308.3					0.210462		0.203647	0.210583	0.0837836	0.0831427	0.093397	2008.88	3178.37					0.498665	0.498665	0.498665	0.2464		0.223042	0.246813	0.0825212	0.0814764	0.0981935	2016.72	3238.59				25.689	25.689	25.689	90	90	90	16952.8		ADATOQ_clean
ADATUW_clean		2136.97	3335.82					0.203757		0.214822	0.203562	0.0909564	0.091299	0.0858169	2017.88	3149.92					0.0140768	0.0152499	0.0156409	0.206709		0.222515	0.20643	0.090839	0.0912247	0.0850541	2016.13	3148.61				25.574	25.574	25.574	90	90	90	16726.1		ADATUW_clean
ADAVAE_clean		2091.78	3191.91					0.185329		0.235472	0.184445	0.0846364	0.0837544	0.0978652	1983.25	3026.31					0.963713	0.963713	0.963713	0.189434		0.273607	0.187949	0.0789675	0.0775327	0.100489	2043.61	3209.43				25.381	25.381	25.381	90	90	90	16350.3		ADAVAE_clean
ADAVEI_clean		2125.98	3239.5					0.187403		0.213607	0.186941	0.081538	0.0813451	0.0844306	2009.68	3062.28					0.591667	0.591667	0.591667	0.171111		0.228575	0.170096	0.0784334	0.0780232	0.0845866	2048.64	3177.38				25.369	25.369	25.369	90	90	90	16327.1		ADAVEI_clean
ADAVIM_clean		2127.31	3336.52					0.1181		0.19449	0.116703	0.0872862	0.086972	0.0918426	2103.65	3299.26					-0.273235	-0.273235	-0.274017	0.124313		0.197752	0.12297	0.0881597	0.0879366	0.0913951	2091.8	3253.99				25.582	25.582	25.582	90	90	90	16741.9		ADAVIM_clean
ADAXEK_clean		996.681	788.87					0.130966	0.199233	0.106441	0.116566	0.0602575	0.0538683	0.0895411	899.237	711.784					0.66836	-2.02002	-0.526988	0.116953	0.135146	0.108834	0.113188	0.0690353	0.0629367	0.0969873	875.329	679.652				7.167	9.85258	12.3722	91.2851	106.834	85.5585	833.695		ADAXEK_clean
ADAXIO_clean		956.506	746.911					0.128754	0.122691	0.0149098	0.135307	0.0579227	0.0546224	0.0730488	923.255	720.973					-1.885	-3.28288	-1.21236	0.152895	0.108372	0.0302774	0.168588	0.0745214	0.0752369	0.0712416	770.579	563.94				18.191	17.177	13.6928	90	129.741	90	3289.95		ADAXIO_clean
ADEGIA01_clean		0	0					0.904322	1.07288	0.941541	0.84607	0.162241	0.0396258	0.442504	0	0					-3.0556	1.55608	-9.77528	1.09536	1.21944	1.47805	1.03274	0.299479	0.192197	0.544693	0	0				8.601	10.1726	11.1253	65.1107	71.799	78.8624	836.663		ADEGIA01_clean
ADEGIA_clean		0	0					0.881222	1.08222	0.948061	0.81051	0.168482	0.0447375	0.451326	0	0					-3.17431	1.23966	-8.7295	1.05557	1.24978	1.57599	0.961925	0.308	0.198989	0.55717	0	0				8.607	10.1557	11.1607	65.2603	71.7615	78.6768	839.088		ADEGIA_clean
ADIQEL_clean		435.293	351.714					0.261375	0.322397	0.000144157	0.261946	0.0886318	0.0799668	0.137733	468.269	378.364					-1.35898	-1.27144	-2.06742	0.182602	0.180527	0.000887839	0.188935	0.0802909	0.0727272	0.123152	0	0				8.201	10.492	11.1252	90	95.2812	90	953.203		ADIQEL_clean
ADOBAX_charged		315.993	192.918					0.183125	0.166884	0.177275	0.192044	0.0984823	0.0682259	0.117449	406.989	248.473					-4.71239	-5.88382	-5.88382	0.201154	0.191559	0.197605	0.206444	0.119147	0.13005	0.112312	0	0				14.916	17.266	17.266	90	90	90	4446.68		ADOBAX_charged
ADOBEB_charged		313.216	191.223					0.187034	0.170135	0.177573	0.197064	0.0986724	0.0687094	0.117455	411.174	251.027					-4.74859	-5.86528	-5.86528	0.202004	0.192725	0.198182	0.207207	0.119323	0.129436	0.112984	0	0				14.916	17.266	17.266	90	90	90	4446.68		ADOBEB_charged
ADOBIF_clean	occupancy	612.792	385.711					0.293347	0.620426	0.40399	0.145797	0.284957	0.271991	0.293933	553.583	348.443					-8.23157	-8.23157	1.55419	0.431549	0.903571	0.432414	0.254347	0.320949	0.314435	0.325459	0	0				17.066	17.066	14.625	90	90	90	4259.51		ADOBIF_clean
ADOBOL_charged		322.232	187.762					0.162489	0.163597	0.180674	0.157928	0.0988913	0.0725611	0.115397	373.527	217.651					-5.05094	-6.09164	-6.09164	0.212019	0.172355	0.172832	0.239334	0.11272	0.13197	0.100653	0	0				14.625	17.066	17.066	90	90	90	4259.51		ADOBOL_charged
ADOBUR_charged		284.144	167.089					0.496732	0.722485	0.631701	0.36083	0.162572	0.068071	0.221812	405.195	238.279					-3.42244	-4.5283	-4.5283	0.209661	0.247963	0.227676	0.187689	0.120786	0.11174	0.126456	0	0				14.653	17.062	17.062	90	90	90	4265.66		ADOBUR_charged
ADOCEC_clean		604.049	393.405					0.366114	0.66408	0.547134	0.228545	0.192445	0.0655173	0.279838	476.665	310.443					-12.881	-12.881	4.64924	1.03747	1.19295	0.766561	1.04789	0.261996	0.163636	0.32972	0	0				17.091	17.091	14.611	90	90	90	4267.91		ADOCEC_clean
ADODAA_charged		1844.02	1775.21					0.326872	0.346898	0.275746	0.329586	0.0393793	0.0351988	0.0498306	1821.14	1753.19					-1.76107	-1.85248	-1.76107	0.196748	0.272835	0.180334	0.187299	0.0480556	0.0481992	0.0476968	1804.29	1643.59				21.334	21.3333	21.3337	60.0008	59.9996	59.9989	6865.61		ADODAA_charged
ADODII_clean		878.107	721.763					0.606677	0.98634	1.06403	0.551418	0.166071	0.0614658	0.632772	777.145	638.767					-5.51445	-0.945711	-0.856534	0.25175	0.355932	0.568715	0.232719	0.149938	0.0925452	0.405997	760.871	588.906				7.393	14.349	16.9759	104.154	102.579	90	1701.56		ADODII_clean
ADODOO_clean		851.249	660.925					0.314426	0.485482	0.455304	0.290846	0.0896642	0.060474	0.219897	818.725	635.688					-6.18405	3.14101	-0.459005	0.1699	0.266243	0.447855	0.152607	0.114195	0.0871299	0.234948	819.66	614.79				7.109	14.54	16.7759	104.118	102.234	90	1641.03		ADODOO_clean
ADODUU_clean		857.679	651.863					0.324344	0.591171	0.0851112	0.296835	0.0715952	0.057303	0.13536	799.238	607.39					-2.91644	0.848811	1.33625	0.167593	0.152977	0.101297	0.170704	0.0716882	0.0688003	0.0845726	840.796	635.302				7.066	14.526	16.7107	104.065	102.206	90	1623.78		ADODUU_clean
ADOGEH_clean	occupancy	1581.08	1550.21					0.561881	0.0695347	0.01991	0.741264	0.28481	0.328939	0.0494563	0	0					4.18667	4.18667	4.18667	0.390338	0.102273	0.0930109	0.49388	0.265414	0.299319	0.084585	1235.26	1369.72				26.334	26.334	26.334	90	90	90	18262.1		ADOGEH_clean
ADUROI_clean	n= 2112	1270.84	3156.85												NA	NA															NA	NA												ADUROI_clean
ADUWIH_clean		1879.66	2602.96					0.1023	0.0685148	0.328122	0.0994665	0.0504936	0.0534688	0.0222293	1860.05	2575.81					0.620696	0.620243	0.618884	0.0805163	0.0372039	0.342985	0.0777282	0.0480807	0.0503406	0.0266119	1876.44	2647.14				22.072	22.072	22.072	90	90	90	10752.9		ADUWIH_clean
ADUWON_clean		2243.08	4303.3																		-1.2944	-1.28007	-1.35204	0.151528	0.174296	0.118827	0.15067	0.0843147	0.080664	0.153678	2162.59	3988.09												ADUWON_clean
AFEDIA_clean		0	0					0.32371	0.582627	0.49145	0.277251	0.065128	0.0495096	0.14322	0	0					-2.84815	-3.04582	-9.10136	0.44257	0.389249	0.188411	0.458726	0.134045	0.137672	0.115909	0	0				10.235	10.8603	13.7456	79.0546	78.7442	86.3256	1470.67		AFEDIA_clean
AFEJOK_ion_b		1439	1306.64					0.2461	0.317762	0.143452	0.246701	0.0621759	0.0633475	0.0498732	1428.91	1297.43					-0.966026	-0.966026	2.22892	0.260155	0.340099	0.0343678	0.262987	0.0934774	0.0964446	0.0623221	1342.01	1175.21				13.478	13.4777	11.1082	93.05	93.0498	69.232	1882.77		AFEJOK_ion_b
AFENEE_clean		0	0					0.250118		0.0156154	0.256289	0.0618963	0.0676191	0.00609902	0	0					-1.05026	-1.07539	1.17714	0.237986		0.0199489	0.243724	0.0592679	0.0644967	0.00828703	0	0				11.54	11.54	14.943	90	90	90	1989.98		AFENEE_clean
AFIPAH_clean		443.563	241.217					0.650402	0.78274	1.02976	0.482776	0.32585	0.0287935	0.588632	238.419	129.643					-22.7094	-22.7092	-3.15452	0.795669	0.700028	1.21095	0.818322	0.356782	0.318419	0.390717	0	0				9.166	9.1658	14.9691	79.9652	79.9664	115.528	1072.59		AFIPAH_clean
AFITEP_clean		925.354	865.397					0.25025	0.646255	0.222226	0.233642	0.052793	0.0508692	0.0768399	917.432	857.947					-9.93118	3.52049	-1.03126	0.381812	0.636479	0.596329	0.366076	0.091168	0.0901313	0.104126	383.21	334.164				6.175	14.7508	17.1436	98.6408	90	102.084	1508.81		AFITEP_clean
AFITUF_clean		1109.27	838.543																		-0.864885	-0.327245	0.316086	0.0907082	0.0856942	0.0777935	0.0916779	0.0513067	0.0538276	0.0331261	1047.38	784.869												AFITUF_clean
AFIXAO_clean		1039.3	926.107					0.514144		0.313128	0.526707	0.0634814	0.0585286	0.0837878	1079.9	962.352					-4.50109	-8.71055	-1.5028	0.577357		0.664046	0.571939	0.105306	0.11229	0.0766736	688.282	526.341				9.453	24.341	24.8473	91.8773	90	90	5714.18		AFIXAO_clean
AFIXES_clean		1090.38	968.59					0.607679		0.432024	0.618658	0.070939	0.0711921	0.069724	946.824	841.067					-4.67336	-5.55308	-4.26494	0.613207		0.626203	0.612395	0.12665	0.139445	0.0652365	630.845	483.079				9.518	24.246	24.6855	90.961	90	90	5695.96		AFIXES_clean
AFOQUI_clean		0	0					0.161161	0.231311	0.244091	0.143735	0.0388954	0.0392186	0.0377965	0	0					-13.261	2.71317	-0.801328	0.387061	0.451112	0.406583	0.376168	0.0740068	0.056031	0.135124	0	0				9.862	13.195	17.8948	84.0895	74.0049	68.0559	2076.3		AFOQUI_clean
AFOTOF_clean		1445.92	1345.8					0.785212	0.764832	0.378355	0.801247	0.0954888	0.0645565	0.209376	1272.26	1184.13					-9.88481	2.02978	0.131739	0.319975	0.361332	0.424073	0.309301	0.106484	0.109164	0.0966184	1300.8	1120.45				8.655	14.105	15.105	115.144	106.646	90	1583.49		AFOTOF_clean
AFOTUL_clean		1476.05	1392.91					0.848454	0.810524	0.434111	0.867906	0.0923503	0.0584827	0.217045	1286.25	1213.87																				8.688	14.166	15.1403	115.094	106.673	90	1600.58		AFOTUL_clean
AFOVAT_clean		1444.52	1387.94					0.318584	0.327486	0.916131	0.298858	0.132815	0.058464	0.406561	1387.48	1333.11					-8.43395	-0.609722	-0.242102	0.287032	0.355385	0.886161	0.256449	0.160685	0.0985353	0.38951	1303.62	1134.21				8.842	14.318	14.4978	113.083	107.755	90	1593		AFOVAT_clean
AFOVEX_clean		1474.42	1442.6					0.429568	0.464627	0.581438	0.418592	0.0712087	0.0631303	0.100952	1431.2	1400.27					-23.2618	-8.66732	9.68946	0.422078	0.601499	0.712555	0.380654	0.247051	0.220038	0.346507	1227.31	917.864				8.789	14.257	15.109	114.932	106.911	90	1626.07		AFOVEX_clean
AFOVIB_clean		1456.64	1330.5					0.698887	0.72564	0.317937	0.705566	0.0894289	0.0612924	0.193023	1281.03	1170.11					-4.14509	1.4887	0.270525	0.256652	0.357927	0.257125	0.238224	0.0759541	0.0785167	0.0665189	1378.96	1230.19				8.622	14.066	15.0819	115.214	106.609	90	1570.06		AFOVIB_clean
AFOVOH_clean		1467.75	1400.3					0.41749	0.414368	0.484442	0.416029	0.0666426	0.0597132	0.097825	1372.49	1309.46																				8.723	14.179	15.0316	114.829	106.869	90	1598.73		AFOVOH_clean
AFOYAW_clean		1361.62	1392.08					0.944589	1.03361	0.32325	0.963501	0.0746855	0.0558951	0.198703	1228.34	1255.86					-1.10922	2.37976	1.15617	0.487122	0.575272	0.198702	0.495134	0.0795802	0.0632134	0.187601	1303.71	1358.77				13.343	13.4045	13.5623	102.337	104.37	90.4787	2290.71		AFOYAW_clean
AFOYEA_clean		0	0					1.32052	0.607048	1.03263	1.40862	0.16481	0.0728147	0.486795	0	0					-41.1649	-17.0645	23.9544	1.22926	1.91981	0.834859	1.22165	0.317033	0.246604	0.563534	0	0				5.128	16.373	10.8	90	99.5295	90	894.263		AFOYEA_clean
AFOYEB_clean		499.216	296.756					1.39953	1.07838	0.25108	1.57332	0.496527	0.344364	0.927653	0	0					-4.23714	-4.23714	1.93556	1.39697	1.11106	0.363476	1.55247	0.474306	0.338172	0.86002	0	0				18.968	18.968	5.773	90	90	90	2077.04		AFOYEB_clean
AFOYIE_clean		1860.31	2441.71					1.19726		1.42893	1.1876	0.0796744	0.0625566	0.19094	1650.93	2166.83					3.22583	3.85674	2.373	0.367818		0.177448	0.37575	0.0691085	0.0625385	0.111813	1723.13	2482.18				7.144	19.439	17.311	90	90	90	2404.02		AFOYIE_clean
AFOYOK_clean		1372.1	1400.89					0.380419		0.0031929	0.392993	0.04766	0.0385509	0.0977597	1288.15	1315.19					-2.86765	2.68136	4.26135	0.293737		7.7119e-05	0.303526	0.0592655	0.0542111	0.0870642	1436.95	1532.7				7.712	13.4745	25.189	90	90	106.629	2508.05		AFOYOK_clean
AFUKET_clean		1409.21	1468.39					0.314755	0.420841	0.306429	0.305692	0.0890994	0.0719203	0.221107	1350.06	1406.74					-1.66237	-1.20461	-1.42936	0.234966	0.345411	0.194007	0.226299	0.0985601	0.0843404	0.207827	1176.52	1174.32				10.521	24.1488	37.8771	88.2663	82.016	77.4192	9301.32		AFUKET_clean
AFUKIX_clean		1753.06	2235.22					0.236847	0.31689	0.213049	0.229588	0.0840253	0.0679292	0.215323	1752.46	2234.47					-1.35905	-3.64725	-0.613262	0.216275	0.287509	0.16966	0.210439	0.0997445	0.0896272	0.182273	1640.69	1968.13				15.327	25.4409	31.0964	73.2444	80.1774	82.0925	11390.2		AFUKIX_clean
AFUPEX_clean		1789.56	1290.79					0.303076	0.424326	0.348822	0.238639	0.067211	0.0349998	0.139686	1662.58	1199.22					-10.2498	0.455712	3.00514	0.371927	0.528934	0.478142	0.284573	0.11905	0.0938107	0.17584	1626.65	1096.6				10.801	10.9062	15.55	90	90	100.401	1801.66		AFUPEX_clean
AGABIU_clean		1649.13	2548.41					0.378096	0.301106	0.0348462	0.464264	0.0927067	0.0383682	0.214969	1581.45	2443.77					-3.60387	-3.49583	-0.933306	0.212956	0.127609	0.0560083	0.277427	0.0515879	0.0338735	0.0914454	1604.3	2275.71				18.605	18.6044	14.904	90	90	119.999	4467.69		AGABIU_clean
AGARUW_clean		1107.33	624.922					0.267847	0.425446	0.0768023	0.196716	0.10397	0.0297005	0.193713	1004.21	566.724					-4.80437	-13.4103	-11.6193	0.740329	1.06648	1.03017	0.520995	0.359879	0.15309	0.609749	531.998	218.726				8.521	15.38	18.477	90	90	90	2421.47		AGARUW_clean
AGAXOV_clean		2429.86	2739.39					0.348939	0.279148	0.0865371	0.409113	0.0403656	0.033422	0.0604249	2262.6	2550.88					-0.861147	0.824694	1.08114	0.197563	0.155442	0.0474537	0.232962	0.0405008	0.0403531	0.0409276	2347.78	2677.77				11.032	18.0675	18.4526	104.812	97.0757	95.2048	3499.94		AGAXOV_clean
AGAYIQ_clean	occupancy	0	0												NA	NA					11.4639	-2.98014	16.0569	1.2138	0.578043	0.310326	1.34145	0.517833	0.554629	0.108995	0	0												AGAYIQ_clean
AGAYOW_clean	occupancy	0	0												NA	NA					6.32554	-12.5721	-2.08758	1.23629	0.883883	0.397813	1.36472	0.416627	0.412839	0.437038	0	0												AGAYOW_clean
AGESIP_clean		0	0					0.380258	0.398985	0.120782	0.439373	0.0635522	0.0243486	0.101051	0	0					0.665875	0.291235	2.20946	0.173798	0.170267	0.0933163	0.201473	0.0719817	0.0525361	0.0905818	0	0				5.644	9.1503	12.836	90	90	95.89	659.406		AGESIP_clean
AGIMOU_clean		0	0					0.341324		0.21998	0.352031	0.107196	0.0427695	0.236048	0	0					-7.09367	-14.9919	-7.60563	0.25341		0.111717	0.265912	0.132033	0.153928	0.0882443	0	0				9.335	9.36033	13.001	90	90	91.2794	1135.73		AGIMOU_clean
AGIREP_clean		2052.31	2055.66					0.203708	0.183852	0.235091	0.209127	0.066297	0.0446805	0.116503	1798.43	1801.37					-0.281676	-0.988232	-1.58877	0.191633	0.175918	0.208464	0.197005	0.0684809	0.0512284	0.108551	1781.14	1731.71				19.739	28.4246	28.4246	61.5954	69.6817	69.6818	12831		AGIREP_clean
AGOFEJ_clean		1898.29	3252.31					0.167946	0.230386	0.100828	0.165023	0.0575667	0.052023	0.107034	1911.35	3274.69					1.07387	1.74479	0.935067	0.103073	0.180289	0.0610268	0.0982537	0.0581566	0.053311	0.101394	1896.66	3373.3				19.425	36.589	37.7622	90	114.202	90	24480.2		AGOFEJ_clean
AGONAM_clean		1098.05	763.768					0.336896	0.452927	0.343396	0.29005	0.0987819	0.0448915	0.240244	1206.35	839.049					-5.03938	-11.8029	2.95458	0.279562	0.307899	0.399799	0.260211	0.105106	0.0882353	0.149393	1009.59	598.858				7.91	11.128	19.4412	90	101.061	90	1679.47		AGONAM_clean
AGONEQ_clean		2005.99	1853.05					0.623018	0.818889	0.533779	0.545447	0.1721	0.0793485	0.403978	2103.84	1943.42					-9.36347	2.77473	1.22629	0.674377	0.887394	0.550291	0.591947	0.181375	0.107932	0.364981	1973.94	1719.4				12.901	14.582	11.824	90	90	90	2224.36		AGONEQ_clean
AGOVOJ_clean		2012.2	3266.38					0.681752	0.402273	0.43554	0.75801	0.112927	0.129096	0.046232	2034.5	3302.49					-0.791036	-0.791036	-1.05151	0.777467	0.548739	0.569676	0.840255	0.116405	0.130799	0.0570277	2054.03	3247.22				29.05	29.05	28.797	90	90	90	24301.9		AGOVOJ_clean
AGUBUA_clean	occupancy	1055.47	575.762					0.710443	0.619654	0.526459	0.915621	0.344013	0.502695	0.0530965	927.882	506.163					-11.7877	-25.8334	-4.24078	1.69591	1.71162	1.83646	1.61966	0.966412	1.17148	0.590462	0	0				10.089	14.789	13.988	90	90	90	2087.1		AGUBUA_clean
AGUTUS_clean		0	0					0.831338		0.396076	0.846883	0.0847669	0.0614072	0.224925	0	0					-5.72358	-0.999493	-0.165558	0.902256		0.365436	0.921429	0.0963613	0.0789089	0.201076	0	0				10.633	12.036	12.8049	90	92.2557	90	1637.49		AGUTUS_clean
AGUVOO_charged		1188.53	1020.59					0.466388	0.616065	0.245728	0.469715	0.0777577	0.0466367	0.202242	1044.61	897.028					-2.43603	-6.18654	6.13619	0.499134	0.705078	0.213751	0.502858	0.0936784	0.0701091	0.187956	0	0				17.426	21.521	26.833	90	90	90	10063		AGUVOO_charged
AGUWUV_clean		0	0					0.506595	0.703649	0.141056	0.504555	0.0670472	0.0323676	0.190903	665.482	440.064					-2.39549	-1.7104	-16.1242	0.70654	0.593701	0.15269	0.762221	0.150216	0.129497	0.224212	0	0				8.193	8.86448	12.2026	110.057	92.8983	105.742	791.09		AGUWUV_clean
AHAMAY_clean		307.495	136.669					0.230443	0.195736	0.320372	0.246289	0.0731374	0.0492782	0.112266	356.552	158.472					-1.22644	-6.93486	-1.91331	0.498867	0.434645	0.407933	0.586676	0.123086	0.113743	0.138407	309.479	123.44				10.249	11.0716	12.8992	92.5172	95.2531	107.33	1387.49		AHAMAY_clean
AHEBAS_clean		0	0					0.210712	0.17894	0.249354	0.214297	0.0646476	0.0595346	0.0936765	0	0					0.733904	0.164169	0.0323036	0.193791	0.165639	0.239216	0.196515	0.063133	0.0580996	0.0917093	0	0				20.793	12.487	19.5023	90	97.3294	90	5022.25		AHEBAS_clean
AHEQAH_clean		2242.09	2952.89					0.683612	0.923402	0.206556	0.663577	0.101431	0.0619492	0.288969	2094.2	2758.12					-3.56959	-2.58298	-1.36283	0.978386	1.30761	0.544849	0.946265	0.119697	0.0856774	0.28129	1961.99	2394.3				21.403	34.255	8.023	90	90	90	5882.14		AHEQAH_clean
AHINIP_clean		0	0					0.207939	0.213946	0.160218	0.208515	0.0795942	0.0801994	0.0691536	0	0					-1.8514	-0.119665	-0.606563	0.215928	0.230129	0.172934	0.216163	0.0831699	0.0846436	0.0577477	0	0				10.592	13.1199	22.306	90	90	100.811	3044.76		AHINIP_clean
AHIYOH_clean	occupancy	643.376	451.347					0.520701	0.525898	0.510643	0.520042	0.0830768	0.0619771	0.16009	805.093	564.789					-2.94843	-3.28456	-1.71436	0.348288	0.350666	0.345523	0.347874	0.0952527	0.0914626	0.109087	599.954	388.286				19.719	15.664	27.118	90	90	90	8376.16		AHIYOH_clean
AHIYUN_clean	occupancy	0	0												NA	NA					8.71238	5.89557	-8.89272	1.5672	0.907092	0.468264	1.68965	1.45917	1.54873	0.346728	0	0												AHIYUN_clean
AHOBEG_clean		0	0					0.577841	0.368167	0.314457	0.610292	0.0669571	0.0508283	0.179859	0	0					0.959917	-16.1397	-2.22322	0.610022	0.692473	0.584189	0.601966	0.164204	0.174524	0.0919615	0	0				10.553	12.7886	14.4432	112.207	90.4007	94.8399	1796.61		AHOBEG_clean
AHOJUC_clean	metalvsorganic	0	0					0.307335	0.262869	0.210462	0.489171	0.0712251	0.0586189	0.0838313	0	0					-34.9405	-8.62516	0.836948	0.986822	0.973295	1.13315	0.954239	0.391567	0.219907	0.563227	0	0				9.243	8.817	9.68418	90	120.919	90	677.065		AHOJUC_clean
AHOKAJ_clean		0	0					0.176116	0.122565	0.0201644	0.414744	0.0474257	0.0478837	0.0469677	0	0					0.297502	0.260539	0.601155	0.177258	0.126308	0.0139803	0.411748	0.0475348	0.0503507	0.044719	0	0				9.247	8.824	9.69335	90	120.721	90	679.938		AHOKAJ_clean
AHOKIR01_clean		0	0					0.169432	0.0329516	0.000399882	0.252071	0.161781	0.222976	0.00114561	0	0					0.734562	0.432182	1.07873	0.169195	0.0541739	0.00121218	0.242487	0.159195	0.217671	0.00569385	0	0				4.4	6.671	10.5589	108.412	91.1884	90	293.993		AHOKIR01_clean
AHOKIR_clean		0	0					0.19965	0.176432	0.000415002	0.289279	0.0811705	0.100023	0.0552477	0	0					0.449315	5.65272	3.8574	0.290476	0.229791	0.00141756	0.447514	0.132898	0.147978	0.112162	936.493	538.181				20.03	6.671	4.39928	90	91.3807	90	587.662		AHOKIR_clean
AHOKOX_clean		0	0					0.222697	0.0980368	0.00469716	0.391834	0.0826341	0.113179	0.0368172	0	0					2.36624	0.316414	1.12454	0.214118	0.137947	0.00543371	0.339031	0.0998492	0.126338	0.0601166	0	0				22.377	6.763	4.353	90	90	90	658.764		AHOKOX_clean
AHOZAA_clean	occupancy	0	0					0.867807	0.274517	0.465799	0.948246	0.820675	0.892064	0.182933	0	0					-7.55514	-0.409379	7.26353	0.949783	0.648325	0.434655	0.999666	0.791658	0.842826	0.334557	0	0				21.972	17.319	17.71	90	90	90	6739.24		AHOZAA_clean
AHUFIU_clean	occupancy	1984.08	2062.53					1.41299		1.00248	1.43335	0.468331	0.510091	0.35269	1848.58	1921.69					-8.09721	1.15439	-3.73979	1.85257		1.14283	1.88776	0.699375	0.710991	0.667208	1254.45	1073.9				18.726	34.191	19.0469	90	107.82	90	11609.9		AHUFIU_clean
AHUTIH01_clean		0	0					0.942767	1.08857	0.733258	0.836442	0.0879256	0.0462887	0.134024	0	0					-5.40873	-26.1685	-3.84339	0.805296	0.832246	1.03081	0.756283	0.334791	0.249759	0.428934	0	0				6.109	7.687	22.6985	90	91.6561	90	1065.47		AHUTIH01_clean
AHUTIH_clean		0	0					0.910558	0.809448	0.957117	1.01946	0.230406	0.256118	0.203706	0	0					9.67611	-26.229	-25.5074	1.74164	1.86315	1.35607	1.65784	0.549593	0.368614	0.737532	0	0				6.107	7.696	22.7024	90	91.6457	90	1066.56		AHUTIH_clean
AJAKON_clean		786.07	574.938					0.226518	0.345574	0.299768	0.202815	0.0751581	0.0581374	0.159261	846.987	619.464					0.362138	0.191482	-2.27318	0.22525	0.337565	0.287257	0.20315	0.0768421	0.0610093	0.155075	785.942	566.115				14.414	23.396	15.564	90	107.631	90	5002.1		AJAKON_clean
AJAMEF_clean		0	0					0.37741	0.363872	0.106706	0.385246	0.0721156	0.0605699	0.193345	0	0					-1.43552	1.19806	-4.34218	0.206374	0.223392	0.0363159	0.209954	0.0928961	0.0836637	0.189836	0	0				10.895	17.52	20.5451	90	99.1611	90	3871.63		AJAMEF_clean
AJAYIT_clean		680.381	342.947					0.175471	0.119642	0.0823782	0.20556	0.0733558	0.0795728	0.0618101	613.672	309.331					-1.58896	-1.58896	-0.818354	0.203806	0.12584	0.0967421	0.243914	0.0800803	0.0861968	0.0687209	557.998	269.809				13.317	13.3169	14.297	90	90	119.998	2195.81		AJAYIT_clean
AJIGIL_clean		849.785	779.705					0.732943	0.890809	0.905133	0.724579	0.0689834	0.059128	0.222563	814.803	747.565					-7.78952	-1.18279	-1.99216	0.699993	0.883099	1.01088	0.688385	0.108158	0.101906	0.205583	627.348	514.047				15.374	23.402	25.344	90	90	90	9118.32		AJIGIL_clean
AJINOY_clean		0	0					0.242909	0.115939	0.150937	0.251506	0.0562289	0.0516457	0.10206	0	0					-2.45572	-2.23223	-1.70995	0.301621	0.264443	0.233922	0.30488	0.0863719	0.081432	0.135771	0	0				9.998	11.0159	12.3749	90.9575	110.694	95.1144	1268.22		AJINOY_clean
AJOTEY_clean		1529.33	1218					0.992278	0.970272	1.09728	0.979542	0.303793	0.084062	0.492134	1305.86	1040.12																				19.077	9.166	14.181	90	90	90	2479.69		AJOTEY_clean
AJOVEB_clean		512.52	261.956					0.705211	0.838909	0.582061	0.678654	0.0869584	0.0309643	0.273606	585.721	299.368					-3.47599	-3.98655	-3.98698	0.261286	0.275868	0.165889	0.263678	0.0930832	0.0718662	0.163807	307.389	139.78				7.72	23.2508	23.2507	61.2079	83.6464	96.3535	3570.01		AJOVEB_clean
AJOXAA_clean		1126.93	736.968					0.352583	0.448572	0.208258	0.320613	0.0642156	0.0296654	0.143478	1104.25	722.167					-1.76475	-6.00226	-21.9133	0.772117	1.08631	1.16825	0.603134	0.301935	0.203263	0.528299	0	0				17.249	11.754	17.7532	90	105.385	90	3470.38		AJOXAA_clean
AJUNOK_clean		0	0					0.0741807	0.0548058	0.152371	0.0741647	0.0534651	0.050082	0.0785966	0	0					-0.368666	-1.32236	-1.07676	0.0929264	0.069415	0.131442	0.0942178	0.060631	0.0585558	0.0760472	0	0				16.085	16.085	20.246	90	90	90	5238.19		AJUNOK_clean
AKEDIF_clean		1503.9	1624.34					0.226569	0.468746	0.244665	0.216906	0.056928	0.05573	0.0737001	1437.7	1552.88					-0.498953	-0.667369	-0.433284	0.0919124	0.135645	0.122974	0.0896331	0.0585829	0.0584941	0.0598266	1473.16	1568.38				31.326	5.889	20.4479	90	102.228	90	3686.62		AKEDIF_clean
AKOBAF_clean		663.929	577.024			collapse		0.244603		1.35562	0.231978	0.104982	0.064034	1.04679	0	0					-3.17809	-1.56077	-3.16479	0.347582		1.20765	0.337808	0.12455	0.0860244	1.01065	0	0				23.404	11.097	20.766	90	120.476	90	4648.11		AKOBAF_clean
AKOHEO_clean	metalvsorganic	0	0					2.42102	2.32102	1.70968	3.526	0.538997	0.0544561	0.722046	0	0					-20.4277	-11.3195	-22.2389	2.54817	2.64453	2.03099	2.77189	1.15199	0.650789	1.34133	0	0				16.204	11.868	17.9587	90	103.643	90	3356.17		AKOHEO_clean
AKOXIJ_clean	occupancy	719.257	503.817												NA	NA					1.82637	-16.1899	14.1637	1.44321	1.75113	0.744718	1.42065	0.970186	0.953304	1.10873	0	0												AKOXIJ_clean
AKUHOD01_clean		0	0					1.89988	1.6391	1.56652	2.09249	0.18886	0.0464986	0.416637	0	0					-2.68537	-3.3893	-17.815	1.31658	1.36271	0.869402	1.34206	0.373873	0.286039	0.514407	0	0				10.512	10.5129	10.8651	78.8907	62.4522	108.835	920.108		AKUHOD01_clean
AKUHOD03_clean	occupancy	0	0					1.51057	1.4253	1.62825	1.55203	0.315544	0.13625	0.579767	0	0					-14.7233	-14.7755	-6.87029	1.99598	1.68547	1.34995	2.2601	0.419527	0.348242	0.524578	0	0				10.527	10.5274	10.752	101.581	117.556	108.814	908.854		AKUHOD03_clean
AKUHOD_clean		0	0					1.91018	1.63481	1.56821	2.1124	0.178589	0.027342	0.420583	0	0					-2.82607	-3.48817	-18.4352	1.29336	1.36842	0.871544	1.29884	0.364678	0.268143	0.519133	0	0				10.527	10.5271	10.8874	101.094	117.546	108.826	924.819		AKUHOD_clean
AKUKUO_clean		778.691	596.802					0.442136	0.322135	0.0583922	0.473736	0.0902733	0.069602	0.200521	667.875	511.821					-0.768988	3.21589	-2.91897	0.207435	0.329294	0.090663	0.193874	0.0848575	0.0701754	0.163162	676.586	513.554				8.854	10.6718	15.3888	76.3985	78.5799	79.9189	1372.64		AKUKUO_clean
ALAHUS_clean		1249.15	914.432					0.259164	0.359916	0.233653	0.232023	0.083507	0.057375	0.15292	1254.25	918.165					1.4915	1.4915	-4.03356	0.295624	0.375914	0.281127	0.273722	0.081379	0.0606526	0.136433	1282.59	928.114				14.234	14.234	63.76	90	90	90	12918.2		ALAHUS_clean
ALALUU01_clean		0	0					1.92015	1.66174	1.6084	2.10884	0.193297	0.0441943	0.431861	0	0																				10.641	10.6411	11.0149	78.6133	62.536	108.554	957.314		ALALUU01_clean
ALALUU_clean		0	0					1.25503	1.20131	1.6207	1.24209	0.23459	0.0540783	0.499341	0	0																				10.633	10.6332	11.0118	78.596	62.5275	108.512	955.799		ALALUU_clean
ALAMUW_clean		2281.19	3509.69					0.0906446	0.0403823	0.0409629	0.103181	0.0801013	0.0891757	0.0256555	2318.43	3566.88					0.20166	0.201128	0.264358	0.0900105	0.0440135	0.0492013	0.10125	0.0811742	0.0897419	0.0297678	2323.85	3597.8				18.794	18.7939	19.9347	61.8765	61.8755	59.9999	5115.41		ALAMUW_clean
ALANAD_clean		2625.99	3766.01					0.213778	0.377989	0.806176	0.151316	0.0931985	0.0519878	0.311616	2575.54	3693.63					1.07533	-1.12199	2.09832	0.250782	0.425393	0.85395	0.185702	0.101821	0.0571085	0.3388	2567.46	3767.68				18.199	20.125	37.4537	74.4144	75.9383	90	12785.9		ALANAD_clean
ALATAK_clean		0	0					0.127777	0.190283	0.449267	0.0563373	0.0696659	0.00961018	0.172619	0	0					-6.61653	-17.156	-37.1386	0.547704	0.853079	0.904586	0.350406	0.238977	0.0804638	0.510713	0	0				14.16	7.271	8.98173	90	108.851	90	875.134		ALATAK_clean
ALEJAE_clean		1442.57	5251.91					0.221031	0.366135	0.322837	0.202766	0.0646887	0.0596607	0.110947	1437.2	5232.42					-0.18101	-0.182238	1.34113	0.218452	0.326719	0.325936	0.204036	0.0651655	0.0600664	0.112077	1430.73	5259.49				24.419	24.4183	55.476	90	90	120	28647		ALEJAE_clean
ALEJEI_clean	n= 1200	2136.05	3555.44												NA	NA					1.31664	1.31664	1.37701	0.104694	0.123992	0.106001	0.100768	0.0460264	0.0437709	0.0585572	2117.1	3667.12												ALEJEI_clean
ALEJIM_clean	n= 1200	2122.82	3585.38					0.0996246	0.0888486	0.235315	0.0949953	0.0541195	0.0472391	0.092344	2110.56	3564.7					0.425603	0.425603	0.503591	0.0957283	0.0854754	0.241372	0.0904967	0.0530192	0.0465624	0.0888902	2103.1	3600.42				30.592	30.592	44.818	90	90	90	41943.8		ALEJIM_clean
ALEQIT_clean		533.424	279.935					0.294039	0.348941	0.335142	0.273455	0.0657504	0.0441847	0.123259	473.223	248.357					-1.88523	-2.94982	-0.527714	0.22557	0.261236	0.261569	0.211682	0.0747694	0.0623875	0.107788	429.896	215.09				10.853	12.2518	16.9034	104.462	93.6599	101.402	2118.23		ALEQIT_clean
ALIBUT_clean		0	0															manually	39		-3.00839	-2.93926	-3.04082	0.440222	0.397721	0.382698	0.453681	0.140358	0.153552	0.106053	0	0												ALIBUT_clean
ALICAA_clean		0	0																		0.677413	0.677413	0.677413	0.147216	0.0320317	0.119884	0.164786	0.115226	0.146664	0.0334846	0	0												ALICAA_clean
ALIFUY_clean		0	0					0.465959	0.481255	0.549581	0.463143	0.0656153	0.0621957	0.0946817	0	0					-10.841	-3.49833	-1.77749	0.734172	0.890973	0.449111	0.730143	0.15202	0.135742	0.29038	0	0				11.987	17.717	12.641	90	103.649	90	2608.8		ALIFUY_clean
ALIPEQ_clean		0	0					1.30461	1.38308	1.22676	1.16713	0.356356	0.156153	0.523191	0	0					-21.443	-28.4663	-9.12597	1.9157	2.01711	1.73906	1.75704	0.772578	0.469727	1.02495	0	0				8.793	8.79278	24.53	90	90	119.997	1642.5		ALIPEQ_clean
ALIXAU_clean_h		447.671	312.485					0.727195		0.27732	0.749783	0.0735972	0.0771619	0.055848	0	0					6.4117	6.94109	11.9785	0.864055		0.504396	0.882113	0.135349	0.126341	0.180203	1633.99	1452.82				15.754	15.754	15.754	90	90	90	3909.96		ALIXAU_clean_h
ALIXOJ_clean		1822.91	1860.43					0.502476	0.492465	0.409773	0.511286	0.079944	0.0630129	0.156134	1754.59	1790.66					-2.46726	-0.481311	0.715172	0.286339	0.348056	0.293958	0.270916	0.0789329	0.0649974	0.141642	1677.43	1668.33				10.247	15.25	20.9456	90	99.9107	90	3224.26		ALIXOJ_clean
ALIXUP_clean		1051.03	785.141					0.200937	0.254348	0.156852	0.190763	0.0512871	0.0377078	0.0862052	1159.51	866.205																				8.139	18.461	18.655	90	90	90	2802.99		ALIXUP_clean
ALOLES_ion_b		340.047	153.995					1.46372	1.42105	1.53002	1.47153	0.308591	0.125602	0.69851	302.099	136.812																				15.256	15.2567	28.0858	91.1106	91.1098	36.6964	3905.62		ALOLES_ion_b
ALOLET_charged		1537.85	1706.36																																									ALOLET_charged
ALOLIX_charged		1755.03	1865.92																																									ALOLIX_charged
ALOLIY_clean		892.44	748.887					0.50092	0.531986	0.497044	0.49565	0.12767	0.0896766	0.336637	940.133	788.856					-4.00294	-1.01468	-25.2777	4.22352	4.21542	4.00667	4.24045	0.466488	0.435084	0.63921	0	0				23.113	7.395	29.6566	90	93.0365	90	5061.81		ALOLIY_clean
ALOLOD_charged	n= 1134	1589.44	1769.09												NA	NA															NA	NA												ALOLOD_charged
ALONEV_clean	n= 1008	1079.91	724.013												NA	NA															NA	NA												ALONEV_clean
ALUJEX_clean		1079.34	752.907					0.275367	0.336101	0.290535	0.253949	0.0751589	0.0489047	0.145807	1010.39	704.825					-2.48226	-2.3131	1.35658	0.249433	0.253788	0.3091	0.244759	0.0870959	0.0659852	0.143903	955.457	639.772				11.107	17.7729	29.228	86.6239	79.6881	73.2739	5436.19		ALUJEX_clean
ALUJIB_clean		1095.81	765.013					0.323155	0.439424	0.46884	0.2761	0.0781759	0.0488808	0.160427	1029.97	719.08																				11.099	17.7681	29.1591	86.548	79.8112	73.1244	5415.77		ALUJIB_clean
ALUJOH_clean		1131.72	799.581					0.308238	0.457797	0.291064	0.259339	0.0792325	0.0482486	0.175183	1060.35	749.188																				11.144	17.8502	29.3396	86.638	79.6662	73.2076	5496.66		ALUJOH_clean
ALUJUN_clean		0	0					0.796613	0.923708	0.780714	0.755132	0.126857	0.0468508	0.318871	0	0					-5.97794	7.85418	-20.6779	0.939617	1.03175	0.222792	0.94873	0.27488	0.252331	0.328997	0	0				8.613	10.1221	11.0953	65.2034	71.612	78.6157	830.906		ALUJUN_clean
ALUKAU_clean		0	0					0.847007	1.03343	0.878155	0.783135	0.15278	0.0452137	0.398645	0	0					-2.97418	1.16998	-7.96693	1.00875	1.19899	1.47611	0.919368	0.289135	0.189292	0.517349	0	0				8.522	10.1544	11.0668	64.7237	71.7376	79.5831	821.134		ALUKAU_clean
ALUKIC_clean		2949.53	5202.73					0.461532	0.668158	0.510896	0.425723	0.0933792	0.0633272	0.21788	3028.66	5342.47					-1.4028	-1.40466	-2.91169	0.233445	0.355547	0.336598	0.210229	0.0887327	0.0769522	0.137538	2999.18	5122.89				16.104	16.1034	28.1278	79.3915	79.39	63.1788	6355.76		ALUKIC_clean
ALUKOI_clean		2959.45	5103.04					0.486038	0.541774	0.477938	0.476974	0.0958039	0.0638629	0.24206	2998.99	5171.33					-1.44209	-1.44767	-2.88701	0.247368	0.387556	0.306078	0.222372	0.0935284	0.0783767	0.162907	3003.89	5009.79				16.109	16.1082	27.9635	79.9798	79.9809	63.0198	6330.34		ALUKOI_clean
ALUKUO_clean		2953.91	5071.86					0.47066	0.538516	0.479663	0.4591	0.0946557	0.062591	0.241478	2971.73	5102.43					-1.43004	-1.42446	-2.80633	0.245167	0.389611	0.299679	0.219578	0.0945345	0.0786026	0.167486	2990.49	4968.83				16.104	16.1048	27.919	79.8989	79.8981	63.1454	6321.59		ALUKUO_clean
ALULAV_clean		2957.67	5005.3					0.478094	0.548285	0.482558	0.466272	0.0953124	0.0621578	0.247125	2977.88	5039.57					-0.967405	-1.09066	-2.12968	0.579636	0.752022	0.471057	0.553921	0.108344	0.0730635	0.26989	3002.69	4978.47				16.064	16.0636	27.9151	79.8904	79.8904	63.1749	6290.25		ALULAV_clean
ALULEZ_clean		1466.2	3442.21																		0.223384	0.223094	0.221935	0.13382	0.10068	0.10737	0.139895	0.0610743	0.0608529	0.0619495	1466.35	3465.64												ALULEZ_clean
ALULID_clean		1922.22	2067.9					0.400539	0.535325	0.747758	0.368429	0.0983848	0.0631655	0.2409	1894.09	2037.68					-13.1133	-5.69636	-20.2439	0.595258	0.914998	0.826991	0.535531	0.320565	0.275164	0.504284	1117.15	818.801				15.743	16.5566	16.976	99.8655	95.6184	115.061	3876.25		ALULID_clean
ALURAB_clean		928.584	882.838					0.168012	0.145922	0.0704595	0.170806	0.0623338	0.0587256	0.094808	996.258	947.178					-4.00175	-1.88616	-2.75062	0.211951	0.202363	0.13223	0.213832	0.0955032	0.0909659	0.136339	0	0				11.4	18.657	24.38	90	90	90	5185.38		ALURAB_clean
ALUREF_clean		0	0					0.166896	0.147706	0.0721876	0.169501	0.0627227	0.0589807	0.0964013	962.96	913.498					-3.85344	-1.89734	-2.11024	0.187077	0.194094	0.123182	0.187884	0.0913794	0.0865369	0.134962	0	0				11.395	18.663	24.329	90	90	90	5173.92		ALUREF_clean
ALURIJ_clean		0	0					0.201217	0.286853	0.165367	0.197779	0.0644183	0.0561412	0.138912	0	0					-3.08932	1.70316	-0.659509	0.157961	0.194031	0.0788923	0.157655	0.0731862	0.0674945	0.124412	0	0				11.297	18.495	24.215	90	90	90	5059.43		ALURIJ_clean
AMAFOK_clean		758.113	507.952					0.373836	0.363858	0.000872939	0.391696	0.0493856	0.0426592	0.0897444	810.039	542.729					-0.201752	2.90886	1.7589	0.402311	0.336219	0.357677	0.410348	0.0516749	0.0479672	0.073921	831.295	578.995				7.772	12.6609	12.6615	64.0746	78.1918	101.809	1033.78		AMAFOK_clean
AMAGAX_clean		826.624	566.507					0.307473	0.245001	0.074328	0.32375	0.0492531	0.042682	0.0886797	844.098	578.476					0.25745	1.19509	1.18322	0.286566	0.217321	0.114849	0.300666	0.0477699	0.0423108	0.0805247	880.897	619.763				7.718	25.2872	25.2866	61.0214	84.1598	95.84	4229.63		AMAGAX_clean
AMALND_clean		0	0			collapse		6.39479	6.69936	5.26999	6.32243	4.40138	5.24563	3.38827	0	0																				11.258	12.602	14.689	90	90	90	2083.98		AMALND_clean
AMEJOS_charged		0	0					0.664994	0.638262	0.389149	0.683153	0.0908895	0.077655	0.132629	0	0					-2.71593	-6.09996	2.45306	0.992763	0.983079	0.627983	1.01429	0.135235	0.118413	0.18829	0	0				14.363	15.9165	17.4597	68.1606	66.2709	64.6006	3203.41		AMEJOS_charged
AMIKOX_clean		0	0					0.220866		0.213955	0.221004	0.0599077	0.0567206	0.0875294	0	0					-0.824293	-0.550548	-1.26933	0.208367		0.229071	0.207953	0.0626902	0.0636408	0.0544519	0	0				9.135	17.419	15.583	90	90	90	2479.61		AMIKOX_clean
AMILOY_clean		1136.44	1128.02					0.102426	0.163977	0.110977	0.0942425	0.0535208	0.0530759	0.0564871	1090.1	1081.97					-1.67756	0.856663	0.174518	0.107053	0.160452	0.132316	0.0993436	0.0564353	0.0566615	0.054927	1094.25	1080				12.327	24.7469	30.541	90	90	98.2313	9220.71		AMILOY_clean
AMILUE_clean		1127.29	1147.53					0.0790848	0.0606691	0.119663	0.0800585	0.0481481	0.0490473	0.0424258	1085.7	1105.17					-0.924635	0.289405	0.284883	0.0886095	0.0740513	0.125758	0.0892059	0.0498426	0.0509842	0.0425779	1083.39	1100.39				12.34	19.903	19.9024	102.772	94.5591	94.559	4728.32		AMILUE_clean
AMIMAL_clean		1134.69	1147.4					0.124183	0.20396	0.142052	0.113344	0.0475568	0.0461096	0.0572047	1037.81	1049.47					-1.29359	0.549388	-0.0975953	0.125706	0.184944	0.15027	0.117272	0.0501661	0.0490321	0.0577263	1096.65	1100.65				12.253	24.7184	31.252	90	90	97.0224	9394.43		AMIMAL_clean
AMIMEP_clean		1107.98	1123.73					0.136222	0.146768	0.150146	0.134499	0.0471215	0.0466756	0.0500942	1067.42	1082.63					-0.641135	0.1967	0.200213	0.111683	0.127526	0.143682	0.108719	0.0487076	0.0483824	0.0508749	1073.67	1088.89				12.275	19.9291	19.9293	103.537	93.8986	93.8986	4711.16		AMIMEP_clean
AMIWID_clean		0	0					0.3531	0.542305	0.349604	0.227351	0.113883	0.029522	0.262756	0	0					-8.83029	-2.7834	-6.23533	0.591428	0.902834	0.605629	0.382246	0.183904	0.108067	0.317733	0	0				10.86	13.2315	14.312	90	90	90.5196	2056.47		AMIWID_clean
AMIWOJ_clean		0	0					0.35432	0.548914	0.340129	0.226167	0.10754	0.0223608	0.257856	0	0					-8.84272	-2.71763	-6.22794	0.561255	0.875402	0.57289	0.350531	0.181714	0.100126	0.325692	0	0				10.853	13.291	14.337	90	90	90.0302	2068.07		AMIWOJ_clean
AMIWUP_clean		0	0					0.362598	0.557385	0.3425	0.234973	0.109881	0.0267316	0.256615	0	0					-8.06046	-5.02227	-2.60946	0.631361	0.918963	0.625889	0.440234	0.180004	0.0931809	0.333222	0	0				10.833	13.2451	14.298	90	90	90.1947	2051.52		AMIWUP_clean
AMIXAW_clean		0	0					0.367116	0.564045	0.345515	0.23823	0.10993	0.0254403	0.259031	0	0					-4.72084	0.648372	-2.59169	0.394792	0.613932	0.363314	0.252195	0.1312	0.0450745	0.283186	0	0				10.807	13.2023	14.257	90	90	90.4036	2034.1		AMIXAW_clean
AMIXEA_clean		0	0					0.371787	0.568444	0.344868	0.243673	0.109753	0.0249663	0.259378	0	0					-5.32258	0.0334093	-0.33256	0.452878	0.671845	0.450133	0.307205	0.139129	0.039988	0.314085	0	0				10.788	13.1703	14.223	90	90	90.4002	2020.77		AMIXEA_clean
AMIZIG_clean	occupancy	568.939	405.247					0.769086	0.69662	0.361781	0.808018	0.300339	0.316535	0.223985	59.7978	42.5937					-2.90399	-2.07876	-2.84365	0.511616	0.541245	0.346564	0.515593	0.24959	0.271587	0.145893	527.508	347.082				7.132	24.327	18.849	90	90	90	3270.3		AMIZIG_clean
AMIZON01_clean	occupancy	0	0					1.86423	0.890373	0.301882	2.04896	0.916967	0.963906	0.119003	0	0					-6.53739	-7.61016	21.5972	1.51485	1.68104	1.60585	1.49256	1.11545	1.17206	0.15303	0	0				8.3	8.46732	13.2258	90.3586	90.3033	115.46	839.176		AMIZON01_clean
AMODUC_clean		2869.18	4983.52					0.891547	0.845528	0.416484	0.910808	0.0839777	0.055055	0.225547	2900.25	5037.74					0.433162	0.367233	-1.11969	0.658726	0.556394	0.367205	0.681945	0.09038	0.0647996	0.215589	2864.13	5097.01				16.23	16.2296	28.0348	80.123	80.1228	62.9329	6441.4		AMODUC_clean
AMOFAK_clean		2948.05	5106.76					0.25196	0.370735	0.30213	0.2324	0.0695208	0.0564313	0.13359	2947.67	5106.3					3.10313	-3.58656	-0.629625	0.252974	0.395549	0.31559	0.229433	0.0895673	0.0726177	0.172531	2922.86	5001.33				16.574	21.79	35.132	90	90	90	12687.8		AMOFAK_clean
AMOYOR_clean		557.249	476.394					0.200925	0.638514	0.243529	0.185101	0.0627614	0.0600075	0.105448	535.837	458.05					-1.26336	-1.167	-0.309342	0.100611	0.131602	0.15304	0.0986381	0.0646419	0.0658706	0.0455984	479.261	398.703				5.865	12.8531	20.9801	92.3165	90	103.191	1538.49		AMOYOR_clean
AMOZAE_clean		0	0					0.491973	0.465695	1.08515	0.408439	0.173118	0.0185634	0.312954	0	0					-29.4826	-15.3012	-21.8547	1.789	2.28554	1.98406	1.46684	0.645359	0.347536	0.914818	0	0				6.759	13.978	14.2655	90	92.495	90	1346.49		AMOZAE_clean
AMUFAR_clean		0	0					0.155803	0.180189	0.105686	0.152642	0.0639203	0.0504441	0.107718	0	0					-3.34567	-2.77784	-3.08294	0.237409	0.218135	0.133733	0.249461	0.0978221	0.0977856	0.0979406	0	0				9.129	9.58798	14.7553	100.389	99.2705	114.467	1115.44		AMUFAR_clean
AMUFEV_clean		0	0					0.151154	0.162208	0.0964224	0.151933	0.0638646	0.0507719	0.102597	0	0					-3.28807	-3.44218	-2.07809	0.214216	0.17837	0.104653	0.232953	0.0932398	0.0938799	0.091346	0	0				9.146	9.65887	12.7618	94.6659	103.836	114.83	972.108		AMUFEV_clean
AMUFIZ_clean		0	0					0.142883	0.161957	0.0854102	0.141435	0.0626339	0.0494153	0.100637	0	0					-3.27264	-1.93922	-2.89331	0.171621	0.161113	0.0637177	0.183155	0.0795212	0.0755214	0.0910209	0	0				9.084	9.61583	12.4256	93.4891	104.357	113.993	944.463		AMUFIZ_clean
AMUFOF_clean		572.826	426.015					0.372109	0.281612	0.189245	0.411027	0.0664226	0.0494305	0.118815	490.648	364.884					-0.391521	-4.75769	1.76908	1.02824	0.941972	0.691169	1.07697	0.280909	0.280291	0.282814	346.062	193.532				9.1	9.39753	14.9284	82.0895	85.4587	65.333	1148.77		AMUFOF_clean
AMUPOP_clean		305.937	234.825					0.0990403	0.101956	0.132928	0.0980636	0.0598837	0.0599315	0.0593543	0	0					0.195341	-1.29525	-2.76116	0.124548	0.110256	0.110237	0.125603	0.0743298	0.0762109	0.0534805	0	0				25.801	16.784	18.9523	90	128.763	90	6399.49		AMUPOP_clean
AMUWIP_charged		2301.41	2982.77					0.177407		0.0277229	0.181943	0.0747329	0.0781742	0.0500709	2183.88	2830.45					-0.863938	1.13711	1.60952	0.174473		0.0339866	0.178731	0.0710962	0.0739453	0.0506776	2222.61	2934.71				20.939	25.433	31.146	90	90	90	16586.5		AMUWIP_charged
AMUWUB_clean		1348.89	1475.57					0.57027	0.504145	0.901956	0.564021	0.077734	0.0662975	0.134917	1336.49	1462.05					-6.33054	-4.12451	-3.19403	0.637258	0.609825	0.921105	0.62781	0.0961178	0.08682	0.142607	1299.59	1258.31				10.036	15.9731	21.5588	98.3325	93.7819	107.759	3234.25		AMUWUB_clean
AMUXAI_clean		1286.77	1256.09					0.661529	0.438009	0.445408	0.696996	0.0770699	0.075174	0.0872601	1274.48	1244.09					-5.43344	-2.50027	-3.22791	0.528247	0.472296	0.378436	0.540953	0.0988177	0.0941607	0.123849	1222.01	1089.74				9.951	15.6821	21.4998	100.073	93.0608	106.836	3142.46		AMUXAI_clean
ANAWIX_clean		1253.4	820.161					0.355843	0.312073	0.3459	0.369059	0.0339751	0.0169133	0.0919853	1224.52	801.244					4.51119	-50.7066	-19.0881	2.06866	1.84647	1.27762	2.18864	0.705783	0.661828	0.85523	0	0				16.264	15.11	14.3756	90	115.148	90	3197.93		ANAWIX_clean
ANAWOD_clean		1414.84	983.711					0.311394	0.16648	0.0314673	0.388662	0.0260446	0.0224374	0.0362652	1289.56	896.58					-0.0223807	-3.85712	-1.99201	0.0981493	0.0654338	0.0373407	0.11541	0.0301735	0.0338584	0.0197329	1340.36	877.94				16.979	21.612	13.89	90	90	90	5096.94		ANAWOD_clean
ANEHEI_clean		0	0					0.439788	0.808473	0.342966	0.410672	0.0789211	0.0683803	0.129617	0	0					-4.32999	-1.76537	0.500501	0.255614	0.647921	0.209575	0.222042	0.0897908	0.0821618	0.126483	0	0				14.921	15.3227	15.9843	72.6682	63.6767	63.7878	2914.94		ANEHEI_clean
ANENEN_clean		683.006	516.039					0.733582	0.324175	0.39627	0.791785	0.123612	0.126258	0.108152	492.55	372.139					-11.5764	2.87438	2.10919	0.650695	0.627266	0.632117	0.654011	0.220519	0.194429	0.372939	0	0				9.799	11.2721	15.9347	70.516	84.6671	71.0475	1569.09		ANENEN_clean
ANENIR_clean		621.966	467.675					0.465839	0.484694	0.428543	0.464435	0.0815491	0.0769913	0.112947	557.923	419.531					-3.13195	-0.690014	-1.10023	0.298202	0.330495	0.335243	0.293928	0.0986151	0.0964325	0.113651	504.607	360.682				9.779	11.3334	15.9243	71.0413	85.2885	70.908	1576.75		ANENIR_clean
ANEPIT_clean		0	0					0.437735	0.516807	0.390302	0.43221	0.0695166	0.0554099	0.188142	0	0					-3.00953	-0.558338	-4.48382	0.396569	0.465505	0.381045	0.39113	0.0870679	0.0806887	0.140711	0	0				14.381	16.1732	21.0491	89.8804	89.8802	65.1019	4440.71		ANEPIT_clean
ANIDIL_clean		412.65	275.135					0.342321	0.229378	0.307637	0.366138	0.0764362	0.0557137	0.15769	534.611	356.46					-4.42466	-1.39251	-5.60047	0.23915	0.194829	0.246272	0.247326	0.0954046	0.0865307	0.1302	313.495	186.475				24.038	23.217	15.2632	90	115.729	90	7673.72		ANIDIL_clean
ANOMOG_clean	occupancy	1866.93	2379.59					1.20206	0.761846	0.487312	1.29607	0.386779	0.420037	0.0948512	1900.59	2422.43					-0.918949	6.71327	-0.521572	0.703384	0.285324	0.146794	0.788023	0.356732	0.388714	0.076002	1854.65	2535.11				32.461	18.024	19.7475	90	119.964	90	10009.5		ANOMOG_clean
ANOMUM_clean		2342.78	2810.01					0.068074	0.0703888	0.0395562	0.0689113	0.0327995	0.0323725	0.0355988	2324.77	2788.61					0.803603	2.5603	0.628219	0.188941	0.0515061	0.0595497	0.218468	0.0307528	0.0297045	0.0376251	2247.44	2788.84				10.304	15.225	20.4072	68.0989	75.3769	90	2858.32		ANOMUM_clean
ANONAT_manual		2183.69	2726.81				NUMBER OF ATOM								704.671	677.537																				10.922	14.981	20.4116	111.531	105.518	90	2975.47		ANONAT_manual
ANUGEW_clean		2021.5	4558.39					0.0838045	0.0651553	0.0353511	0.0895725	0.061728	0.0634543	0.0514979	2022.65	4560.79					1.06927	0.774043	0.77819	0.0792153	0.0695124	0.0569636	0.0820776	0.0602754	0.0603971	0.0595545	2008.75	4641.32				24.605	26.5487	26.5487	77.5991	62.3925	62.3925	13618.1		ANUGEW_clean
ANUGIA_clean		2133.31	3756.02					0.720448	0.795506	0.711987	0.706554	0.0664365	0.0638193	0.0818488	2124.77	3740.96					1.07258	1.07087	1.0703	0.152355	0.10576	0.0862089	0.16438	0.0649398	0.0623353	0.0802776	2081.8	3778.76				17.584	17.5838	17.5836	96.8317	96.8296	96.8296	5310.78		ANUGIA_clean
ANUGOG_clean		2334.14	3992.23					0.154021	0.177181	0.0349036	0.155282	0.0588588	0.0587859	0.0592882	2404.1	4111.88					0.876079	1.16203	0.946428	0.110906	0.115022	0.0519737	0.112928	0.0562919	0.0550846	0.0634014	2339.42	4118.33				18.115	18.1147	24.397	74.5412	74.5434	106.385	6878.83		ANUGOG_clean
APACAX_clean		901.13	894.626					0.122088	0.16815	0.0570418	0.114766	0.053867	0.0472493	0.0856323	787.584	781.937					-1.36419	-1.36809	-2.34954	0.125519	0.158219	0.0263004	0.122471	0.0552461	0.054953	0.0566528	658.335	620.908				28.222	28.222	9.727	90	90	90	7747.37		APACAX_clean
APAGIJ_clean		0	0					0.416163	0.486212	0.632041	0.405573	0.0627324	0.0625085	0.0645241	378.563	262.975					-0.789188	-2.91133	-0.740034	0.155102	0.145156	0.262336	0.151499	0.073318	0.077976	0.0360536	0	0				10.226	12.3004	19.2831	77.1525	77.7604	72.0541	2222.65		APAGIJ_clean
APARAM_clean		943.788	977.555					0.210738	0.218434	0.00149346	0.213924	0.0676845	0.0609889	0.136873	955.742	989.945					-3.07744	-3.06572	-3.43683	0.274946	0.190033	0.138655	0.283445	0.100281	0.0942529	0.162572	890.053	835.631				22.2	22.2002	7.73	90	90	120	3299.29		APARAM_clean
APAYIB_clean		1719.88	1550.27					0.150662	0.227217	0.275963	0.132392	0.0727662	0.0564838	0.141323	1593.62	1436.51					-2.62114	1.48682	-0.537975	0.210232	0.305234	0.269925	0.190554	0.0810836	0.0635753	0.154803	1619.22	1443.75				33.02	13.317	14.2204	90	101.738	90	6122.33		APAYIB_clean
APAYOH_clean		1846.19	1661.04					0.133972	0.205214	0.25631	0.11679	0.0676974	0.0537198	0.12655	1707.02	1535.89					-2.91428	1.60477	-1.05915	0.195585	0.286385	0.261847	0.176489	0.0786065	0.0633568	0.142815	1703.96	1505.47				33.13	13.572	14.0496	90	101.325	90	6194.26		APAYOH_clean
APAYUN_clean		1604.4	1532.8					0.123218	0.168714	0.530181	0.101969	0.0791796	0.0504308	0.200227	1575.46	1505.18					-6.39596	-1.38473	-2.99844	0.336246	0.502248	0.862786	0.288666	0.159553	0.0966655	0.424342	1364.72	1172.92				33.69	12.97	14.7712	90	101.572	90	6323.22		APAYUN_clean
APAZAU_clean		2158.96	2225.02					0.131904	0.221945	0.271709	0.115712	0.0728161	0.0594424	0.137774	2053.2	2116					-2.5369	1.33167	-1.60923	0.203614	0.304712	0.263741	0.18774	0.0786923	0.064574	0.147267	2048.22	2062.69				42.142	14.065	13.8699	90	101.997	90	8041.51		APAZAU_clean
APAZEY_clean		2156.3	2219.08					0.130784	0.211949	0.252583	0.116289	0.0652288	0.0541984	0.124445	2072.11	2132.49					-2.20429	1.31785	-2.40288	0.199901	0.297308	0.263127	0.18448	0.0756357	0.0617129	0.150379	2076.04	2081.19				42.145	14.296	13.7714	90	101.684	90	8125.41		APAZEY_clean
APAZIC_clean		2069.23	2315.59					0.134479	0.21143	0.502931	0.114714	0.0792963	0.0539378	0.215432	2086.82	2335.28					-4.40503	-1.75804	-3.52997	0.345815	0.595369	1.07833	0.292724	0.149757	0.0917411	0.461211	2050.04	2070.73				14	14.647	42.0398	90	97.948	90	8537.79		APAZIC_clean
APAZOI_clean		1550.61	1352.49					0.402187	0.33989	0.291278	0.424218	0.0719013	0.0458637	0.151384	0	0					-15.9535	-19.4292	-14.6209	1.45158	1.70108	0.39474	1.43158	0.361491	0.312506	0.511024	0	0				24.799	13.263	14.9713	90	96.6356	90	4891.21		APAZOI_clean
APEBED_clean		0	0					0.327067	0.315097	0.362197	0.328483	0.0413529	0.0359278	0.0589843	0	0					-0.72246	-1.67569	-6.24505	0.33928	0.395637	0.357031	0.31226	0.0524013	0.0547482	0.0447739	0	0				10.215	13.117	14.136	90	90	90	1894.08		APEBED_clean
APEBEE_clean		990.426	755.814					0.27059	0.330398	0.187172	0.273266	0.0518142	0.0544512	0.039508	807.725	616.386					-0.967064	-0.595542	-1.35175	0.110197	0.151633	0.103207	0.109511	0.0622008	0.0655525	0.0465596	935.025	690.444				8.562	8.83921	16.9036	82.2376	89.5932	78.2502	1240.73		APEBEE_clean
APEBII_clean	occupancy	0	0												NA	NA					3.13159	3.22413	-7.15408	0.759621	0.556938	0.474753	0.794963	0.498765	0.523231	0.0746888	0	0												APEBII_clean
APEBOO_clean	occupancy	1699.51	1362.11			collapse		1.21656	0.12973	0.220472	1.37372	1.24852	1.30063	0.0673026	0	0					2.82632	2.82153	-7.41774	1.23987	0.190473	0.175907	1.39462	1.27326	1.32546	0.0901375	0	0				18.816	18.8159	38.416	90	90	120	11778.6		APEBOO_clean
APEBUU_clean		634.8	424.386					0.169715	0.34429	0.219097	0.155172	0.0728121	0.0537979	0.142255	0	0					-0.707773	-1.01414	-2.3965	0.243486	0.40916	0.323763	0.227515	0.0937794	0.0749666	0.162487	0	0				28.187	14.002	27.6575	90	116.228	90	9791.85		APEBUU_clean
APETAS_clean		0	0					0.455924	0.502894	0.326972	0.4469	0.122539	0.044632	0.278352	0	0					-14.6098	1.3669	-27.7633	1.51782	1.68999	1.31928	1.45733	0.304617	0.275981	0.36189	0	0				6.865	11.42	17.4398	90	98.6602	90	1351.66		APETAS_clean
APUPEH_clean	occupancy	1576.24	5285.6												NA	NA					1.83079	1.98349	1.98713	0.968937	0.831089	0.691483	1.00082	0.267996	0.282812	0.152762	NA	NA												APUPEH_clean
AQAJEI_clean		0	0					0.0881082	0.0880171	0.108387	0.0875793	0.0497599	0.0505832	0.0411152	0	0					-0.82058	-0.840442	0.0689533	0.117916	0.127279	0.118455	0.117409	0.0529529	0.0543874	0.0378905	0	0				19.767	15.801	16.968	90	90	90	5299.76		AQAJEI_clean
AQALIO_clean		0	0					0.229518	0.237042	0.350639	0.180391	0.11374	0.0277819	0.161017	0	0					-42.2138	-31.5535	9.03745	1.6837	1.80524	2.8786	1.11861	1.2561	0.473794	1.68637	0	0				11.452	15.829	12.685	90	90	90	2299.46		AQALIO_clean
AQALOU_clean		0	0					0.233029	0.241412	0.341824	0.186139	0.113248	0.0295314	0.159292	0	0					-41.9888	-31.5647	9.362	1.67605	1.80017	2.85946	1.11003	1.24614	0.468502	1.67384	0	0				11.425	15.824	12.649	90	90	90	2286.8		AQALOU_clean
AQEFOS_clean	occupancy	0	0					1.10849	1.84597	0.992125	0.913453	0.512209	0.327131	0.705452	0	0					-0.75186	-7.1976	-15.5363	2.54243	2.10687	1.72179	2.81669	0.647374	0.459453	0.843586	0	0				11.691	13.492	20.6154	89.2751	76.7502	66.9297	2901.24		AQEFOS_clean
AQEFUY_clean		0	0					0.269122		0.272119	0.268908	0.0901756	0.0946143	0.0679822	0	0					1.8203	2.38486	-0.911857	0.241808		0.326989	0.235724	0.0909094	0.0887602	0.101655	0	0				23.353	20.538	12.6229	90	98.322	90	5990.5		AQEFUY_clean
AQEGUY_clean	occupancy	1030.67	704.228					1.28645	1.58134	0.588901	1.27027	0.793513	0.829775	0.537093	470.612	321.571					-2.60798	0.816658	0.266207	1.18929	0.945212	1.01216	1.2184	0.697937	0.749142	0.335846	0	0				13.984	14.7923	15.3644	75.4312	82.7386	77.7405	2996.91		AQEGUY_clean
AQEQES_clean		1478.94	1374.65					0.3643	0.356685	0.512426	0.356946	0.0453885	0.0387569	0.0785468	1604.86	1491.71					0.439057	-6.38126	-6.65802	0.480587	0.565253	0.43438	0.462308	0.0735905	0.0794414	0.0443357	1369.59	1116.47				10.659	15.69	11.409	90	90.1004	90	1908.03		AQEQES_clean
AQEQIW_clean		1458.64	1325.35					0.660799	0.903566	0.740012	0.595156	0.179226	0.0781173	0.684769	1595.23	1449.49					-2.43064	7.43542	-1.46359	0.532395	0.509444	0.778012	0.522782	0.146026	0.12089	0.271708	1488.98	1390.15				10.878	15.152	11.622	90	96.2487	90	1904.2		AQEQIW_clean
AQERUL_clean	occupancy	0	0												NA	NA															NA	NA												AQERUL_clean
AQETIA_clean		0	0					1.20666		0.5692	1.28021	0.112977	0.0459709	0.188358	0	0					-10.8567	-8.29574	-19.5761	0.788113		0.665323	0.802281	0.225119	0.254111	0.192504	0	0				10.605	14.3865	15.575	90	90	108.286	2256.26		AQETIA_clean
AQETUM_clean		0	0					0.923683		0.929767	0.922542	0.312308	0.0235066	0.456709	0	0					-5.84267	-6.01285	-10.4642	0.422115		0.273794	0.449925	0.155137	0.120051	0.172681	0	0				9.636	13.997	14.1742	90	96.1723	90	1900.66		AQETUM_clean
AQIQAU_clean		1805.18	2094.87					0.107226	0.192171	0.474799	0.0895422	0.070484	0.0527726	0.189403	1812.48	2103.38					0.147776	-0.63616	-0.861346	0.131092	0.237506	0.442208	0.112672	0.0733542	0.0571051	0.182455	1810.67	2064.29				26.865	12.937	23.8584	90	109.571	90	7812.99		AQIQAU_clean
AQIQIC_clean	occupancy	0	0					0.601975	0.817403	0.394375	0.53573	0.304572	0.268274	0.395319	0	0					9.47548	-5.88359	-1.78942	0.807098	1.09523	0.820022	0.693228	0.347536	0.307062	0.448723	0	0				23.412	11.374	19.7553	90	122.519	90	4435.81		AQIQIC_clean
AQIXUU_clean	occupancy	417.437	180.227			collapse		1.12195	0.588491	0.706769	1.3438	1.03891	1.28972	0.324737	0	0					-6.38301	-1.56752	29.1086	1.31822	0.537295	0.533022	1.67158	1.16819	1.5011	0.220248	0	0				9.42	9.42003	10.242	90	90	120	787.079		AQIXUU_clean
AQIXUV_clean		1028.16	1100.22					0.387283	0.358029	0.169775	0.38986	0.0713505	0.0700469	0.105524	1012.52	1083.48					-1.78496	-3.13621	-2.46829	0.338353	0.412315	0.112774	0.3386	0.0888644	0.0882704	0.104436	952.396	950.869				13.709	17.7219	23.8102	70.7449	77.4938	88.3994	5325.57		AQIXUV_clean
AQMAND01_clean		0	0					2.03494	1.65135	1.60637	2.32825	0.191545	0.0419538	0.420918	0	0					2.31453	-4.06787	-26.7474	1.54218	1.67827	0.904426	1.53684	0.546032	0.279484	0.954738	0	0				10.603	10.6029	10.9731	78.6616	62.5577	108.635	946.722		AQMAND01_clean
AQMAND_clean		0	0				NUMBER OF ATOM								0	0				NUMBER OF ATOM											0	0				10.612	10.612	10.9856	101.309	117.491	108.613	949.301		AQMAND_clean
AQODOA_clean		0	0					0.185652	0.46665	0.048922	0.18128	0.0607191	0.0597531	0.0695338	0	0					5.79215	-6.97396	-1.32045	0.326587	0.530038	0.352943	0.319623	0.0751762	0.080478	0.0267979	0	0				6.442	8.91	24.4165	90	97.2918	90	1390.13		AQODOA_clean
AQOLEZ_clean		1226.33	1577.81					0.116602		0.0752912	0.118642	0.0495172	0.0544087	0.0279942	1222.07	1572.35					-0.873521	-0.873521	-0.73827	0.122155		0.0654707	0.124954	0.0540913	0.0585841	0.0343232	1222.46	1534.05				18.706	18.706	18.706	90	90	90	6545.5		AQOLEZ_clean
AQOLID_clean	n= 2232	1167.9	1007.03												NA	NA					0.183722	0.244693	0.847929	0.384781		0.3468	0.390408	0.0958455	0.039054	0.191954	NA	NA												AQOLID_clean
AQOLOJ_clean	occupancy	1223.73	1332.23					1.04013		0.152983	1.07672	0.539921	0.590295	0.13693	1440.77	1568.5					-5.51612	-5.52038	-5.52038	0.960834		0.0084573	1.00011	0.587758	0.659464	0.0141053	1462.97	1343.26				18.794	18.794	18.794	90	90	90	6638.31		AQOLOJ_clean
AQOLUP_clean	n= 1848	1242.35	1576.01												NA	NA					-1.67023	-1.67023	-1.67023	0.125865		0.147678	0.12467	0.0524176	0.0486778	0.0673769	1247.67	1504.78												AQOLUP_clean
AQOMAW_clean		1222.29	1067.7					0.475248	2.48847	0.936491	0.307497	0.222861	0.0520378	0.473402	1197.99	1046.39					-3.0853	-3.0853	-3.0853	0.673065	2.29216	0.83097	0.569716	0.258446	0.0828033	0.516054	1153.22	916.967				18.834	18.834	18.834	90	90	90	6680.79		AQOMAW_clean
AQOMEA01_clean	n= 1848	1235.14	1610.52												NA	NA					-2.74791	-2.74791	-2.74791	0.180677		0.192762	0.180014	0.065578	0.0569581	0.100057	NA	NA												AQOMEA01_clean
AQOMEA_clean	n= 1848	1239	1653.53												NA	NA					-3.4977	-3.4977	-3.4977	0.201201		0.214438	0.200475	0.0851263	0.0726652	0.134971	NA	NA												AQOMEA_clean
AQOSEG_clean		0	0					0.393809		0.382573	0.394278	0.0758211	0.066712	0.146092	1182.24	1166.73					-0.0766286	-0.0763437	0.0587975	0.435366		0.397525	0.436943	0.0753698	0.066544	0.143454	1281.76	1263.8				35.104	35.104	11.735	90	90	90	14460.9		AQOSEG_clean
AQOTIK_clean		992.923	673.863					0.0948631		0	0.101187	0.0769864	0.0819116	0.0538377	999.649	678.427					-2.34728	-2.02441	2.47841	0.556604		0.061079	0.589639	0.203292	0.237725	0.0414584	0	0				7.17	7.17	13.662	90	90	90	702.348		AQOTIK_clean
AQUCOF_clean		1619.95	1554.38					0.871637	1.04994	0.933625	0.828538	0.0988862	0.0739867	0.170028	1567.34	1503.95					0.28063	2.84771	-1.22132	0.600032	0.750363	0.652747	0.56364	0.0917767	0.0757653	0.137524	1667.55	1623.64				11.403	12.9967	23.057	90	90	111.636	3176.33		AQUCOF_clean
AQUCOG_clean		1454.91	1212.72					0.23984	0.33314	0.0982994	0.212168	0.092694	0.0417816	0.160577	1426.61	1189.13					1.16758	1.18621	-5.98475	0.239067	0.32984	0.221559	0.188104	0.09665	0.0513235	0.157085	1418.49	1137.99				25.754	25.7543	6.755	90	90	120	3880.17		AQUCOG_clean
AQUCUM_clean		1450.17	1209.69					0.227894	0.320018	0.0777575	0.202647	0.0891247	0.0505326	0.140581	1427.48	1190.68					1.02674	1.05275	-5.70443	0.245291	0.320695	0.195496	0.210009	0.0936843	0.0606945	0.137671	1416.14	1137.23				25.761	25.7615	6.756	90	90	120.001	3882.84		AQUCUM_clean
AQUDAS_clean		1644.5	1581.89					0.885843	1.04808	0.930722	0.848011	0.0967185	0.0705624	0.168053	1524.8	1466.7					3.22275	2.97811	-0.166212	0.524128	0.777684	0.566262	0.468361	0.0824312	0.0719804	0.110933	1755.42	1773.68				11.409	12.995	23.103	90	90	111.629	3184.08		AQUDAS_clean
AQUDAT_clean		0	0					0.429642	0.541286	0.20267	0.435006	0.0708669	0.0469267	0.180992	0	0					0.780958	-2.29031	-0.0531061	0.429746	0.176267	0.233321	0.450672	0.0627071	0.0523716	0.11025	0	0				28.631	9.274	9.28371	90	116.615	90	2203.84		AQUDAT_clean
AQUDEX_clean		0	0					0.444542	0.569214	0.229155	0.448761	0.0729654	0.0470591	0.192135	0	0					0.632057	-2.32378	-0.0948336	0.437165	0.196906	0.225228	0.458197	0.0628124	0.0532859	0.106634	0	0				28.684	9.265	9.30075	90	116.369	90	2214.56		AQUDEX_clean
AQUDIB_clean		1450.72	1209.5					0.258261	0.355274	0.106768	0.230353	0.0966431	0.043753	0.167163	1425.02	1188.13					1.04341	1.07098	-5.72274	0.248484	0.334902	0.226364	0.201058	0.0982572	0.0489013	0.164065	1415.95	1136.66				25.752	25.7521	6.758	90	90	120	3881.26		AQUDIB_clean
AQUDOH_clean		0	0					0.450018	0.61257	0.219573	0.453176	0.0742971	0.0469558	0.200067	0	0					0.361114	-2.50442	-0.265395	0.418353	0.223165	0.218441	0.43673	0.0626375	0.0549329	0.0980787	0	0				28.744	9.267	9.32918	90	116.098	90	2231.65		AQUDOH_clean
AQUKII_clean		0	0					0.367153	0.383394	0.201314	0.374769	0.0982036	0.0488569	0.295591	0	0					-8.46534	-14.439	-7.98208	1.41698	1.77564	0.850245	1.37411	0.302098	0.304939	0.290732	0	0				6.804	9.15063	14.8418	103.815	100.756	101.498	852.271		AQUKII_clean
ARADEE_clean		2065.92	1748.17					0.270465	0.421627	0.244073	0.22358	0.0751935	0.0421853	0.172276	1930.83	1633.9					2.14136	-15.3598	-46.9366	1.99339	2.37377	1.52586	1.90794	0.373044	0.166714	0.979896	0	0				21.79	16.634	13.5149	90	93.8141	90	4887.69		ARADEE_clean
ARAFEF_clean		1609.4	1921.11					0.73483		0.42101	0.747906	0.06754	0.0578304	0.130652	1593.21	1901.78					4.06735	3.03379	1.21043	0.0906525		0	0.0944297	0.0646299	0.0556626	0.122917	1623.16	2102.66				22.538	7.044	13.772	90	90	90	2186.41		ARAFEF_clean
ARAFIJ_clean		1521.68	1609.66					0.704958		0.370087	0.718911	0.0714477	0.062593	0.129003	1438.18	1521.18					3.68887	3.37721	0.603093	0.0930094		0.0038082	0.0967261	0.0669174	0.0582284	0.123396	1552.6	1771.08				23.739	7.072	11.54	90	90	90	1937.36		ARAFIJ_clean
ARAFOP_clean		804.095	687.964					0.978349		0.244242	1.00894	0.075544	0.0589092	0.183671	528.335	452.016					5.79985	-4.67893	-35.2689	0.580228		0.158287	0.597809	0.156652	0.0994846	0.52824	0	0				24.561	6.986	9.133	90	90	90	1567.07		ARAFOP_clean
ARAGOR_clean		1093.21	945.459					0.778441	0.948119	0.577038	0.725407	0.0960361	0.0429682	0.221469	1213.14	1049.16					7.34657	-29.7665	-30.8641	1.18769	1.23744	0.408121	1.2522	0.40748	0.367951	0.500913	0	0				17.009	11.994	25.0313	90	92.9105	90	5099.95		ARAGOR_clean
ARAHIM01_clean		0	0					0.604818	0.230906	0.155029	0.655757	0.0861708	0.0675719	0.117169	0	0					-14.4942	-14.6135	-5.00985	1.45055	0.054241	0.0965958	1.61472	0.215437	0.193037	0.25277	0	0				9.888	9.888	15.783	90	90	90	1543.14		ARAHIM01_clean
ARAHIM02_clean		0	0					0.433731	0.0641595	0	0.500673	0.0573754	0.0658928	0.0431797	0	0					0.0742231	0.0944383	-9.21594	0.448381	0.0452142	0.00585399	0.518855	0.0912546	0.133282	0.0212095	0	0				9.943	9.943	15.764	90	90	90	1558.48		ARAHIM02_clean
ARAHIM_clean		0	0					0.485077	0.107826	0.081894	0.532421	0.0618851	0.0641322	0.0581399	0	0					2.86663	2.86763	-8.1997	0.200463	0.0234884	0.0485137	0.219698	0.0941617	0.1096	0.0684316	0	0				9.942	9.942	15.764	90	90	90	1558.17		ARAHIM_clean
ARIDIQ_clean		1275.63	1492.31					0.411919	0.734722	0.61392	0.400308	0.0671148	0.0685203	0.0310416	1226.07	1434.23		manually	56		-14.514	-7.71219	2.50415	1.89465	1.90346	1.90945	1.89421	0.171764	0.174992	0.0889154	730.645	691.149				29.265	7.897	42.565	90	90	90	9837.01		ARIDIQ_clean
ARINOF_clean		0	0					0.150337		0.0103002	0.15303	0.0739103	0.0743309	0.0682322	0	0		manually	131		-14.2087	6.67755	-15.7253	0.830528		0.270214	0.841303	0.17891	0.17206	0.271383	0	0				12.726	8.057	13.505	89.9577	90.123	89.9289	1384.71		ARINOF_clean
ARINUL_clean		345.135	306.659					0.147191		0	0.14949	0.0835027	0.0850663	0.0577029	0	0					0.75974	0.75974	1.24103	0.127471		8.88178e-16	0.129463	0.0788289	0.0793212	0.0707065	0	0				20.586	20.586	7.522	90	90	90	3187.7		ARINUL_clean
AROFAP_clean		1168.19	998.478					0.619368	0.966994	0.502053	0.577624	0.0906733	0.0552274	0.309425	1072.98	917.099					-0.212062	-0.0435551	0.0521915	0.227219	0.488474	0.222284	0.193118	0.0799021	0.0567344	0.22288	1130.51	964.575				15.42	15.842	17.8191	112.762	112.204	95.4259	3565.41		AROFAP_clean
AROFET_clean		2010.71	2348.5					0.82645	1.07476	1.18768	0.782041	0.123246	0.055301	0.499557	1921.05	2243.72					-3.50742	2.72451	-1.28679	0.379656	0.72582	0.367048	0.33467	0.106793	0.0694123	0.313825	2004.88	2308.56				13.346	16.1862	17.7805	112.597	107.376	97.626	3248.06		AROFET_clean
ARUCOH01_clean		0	0					0.219403	0.311795	0.19953	0.21367	0.0661759	0.0583405	0.142291	0	0					0.00298181	-2.27131	0.508509	0.190024	0.22067	0.155478	0.188581	0.0716829	0.0653284	0.133412	0	0				10.061	25.034	14.6902	90	103.082	90	3603.95		ARUCOH01_clean
ARUCUN_clean		0	0					0.392225	0.176521	0.181414	0.410422	0.0691486	0.0605138	0.150563	0	0					-4.34924	-2.78324	-2.56052	0.425257	0.326834	0.321064	0.433696	0.106921	0.102727	0.14646	0	0				10.142	13.2217	14.8723	109.019	101.881	98.9985	1790.39		ARUCUN_clean
ARUDAU_clean		0	0					0.422981	0.194801	0.176803	0.442623	0.0682851	0.0593156	0.152854	0	0					-3.97045	-3.11096	-3.24405	0.502802	0.344565	0.34206	0.516255	0.104651	0.10032	0.14549	0	0				10.119	13.6709	15.0093	111.271	101.927	99.4603	1826.72		ARUDAU_clean
ARUJED_clean		0	0					0.346907	0.394333	0.11454	0.348162	0.0825099	0.0678043	0.175645	0	0					-4.99219	-4.65322	-10.0547	0.621181	0.213007	0.10478	0.68439	0.139094	0.142751	0.115936	0	0				14.156	10.524	27.0325	90	100.648	90	3957.9		ARUJED_clean
ARUYES_clean		1109.23	750.205					1.03072	1.17722	0.898734	1.00026	0.0834402	0.0428396	0.170055	1006.32	680.589					-6.56921	2.07601	-0.628767	0.216154	0.224824	0.148141	0.219168	0.0935776	0.0816445	0.119035	1121.25	719.383				7.08	17.326	20.7867	90	99.2743	90	2516.53		ARUYES_clean
ARUYOB_clean	metalvsorganic	0	0					0.358829	0.355033	0.295589	0.388237	0.0764366	0.0716033	0.0828811	0	0					-28.6583	-21.5346	-8.14112	1.33856	1.21459	2.07808	1.2472	0.707892	0.508117	0.974259	0	0				9.547	26.405	7.99505	90	99.4741	90	1987.97		ARUYOB_clean
ARUYUH01_clean	metalvsorganic	1110.3	662.797					0.487306	0.472441	0.280954	0.586986	0.0847645	0.106654	0.0555781	740.713	442.152					-27.364	-15.5544	-15.7494	2.94302	2.82566	2.9799	3.10524	0.772666	0.745549	0.808823	0	0				9.819	23.326	8.934	90	90	90	2046.23		ARUYUH01_clean
ARUYUH_clean	metalvsorganic	820.739	488.715					0.510968	0.496975	0.295959	0.612586	0.0441937	0.0348677	0.0566284	769.284	458.087					-50.8421	-7.67909	7.36759	2.41519	2.21673	2.42845	2.7079	0.838356	0.852704	0.819225	0	0				9.816	23.284	8.931	90	90	90	2041.23		ARUYUH_clean
ASACON_clean		808.297	454.533					0.528371	0.571313	0.450247	0.513964	0.184144	0.145075	0.262283	607.878	341.831					-11.5743	4.44173	3.60073	0.65496	0.60074	0.61888	0.693877	0.237043	0.176319	0.358493	551.95	296.968				12.056	15.987	15.383	90	90	90	2964.91		ASACON_clean
ASADAA_clean		1072.28	704.983					0.965586	1.18114	1.0023	0.904574	0.166936	0.0538532	0.463778	1035	680.45					0.157441	-2.00868	-13.9316	1.00419	1.07778	0.924757	0.988932	0.212111	0.133049	0.419648	891.545	498.07				11.941	15.298	17.316	84.7216	76.365	67.0301	2830.29		ASADAA_clean
ASAHEJ_clean	Z>86	1334.27	634.475												NA	NA															NA	NA												ASAHEJ_clean
ASAJOU_clean		0	0					0.448066	0.41837	0.144817	0.466163	0.115109	0.112879	0.126057	0	0					-1.91446	1.17811	3.0664	0.391639	0.329859	0.0895999	0.414673	0.115645	0.115231	0.117673	0	0				22.121	17.554	7.0484	90	97.0575	90	2716.24		ASAJOU_clean
ASALAH_clean		0	0					0.712696	0.598551	0.420035	0.743341	0.138412	0.0766893	0.372959	0	0					-6.30278	-8.16097	-0.897566	0.751564	0.677607	0.269999	0.788592	0.18068	0.12252	0.40169	0	0				7.15	9.528	16.021	90	90	90	1091.43		ASALAH_clean
ASALIP_clean		0	0			collapse		1.92333	1.94814	2.84235	1.87234	0.402088	0.076742	1.76854	0	0					-2.47602	-12.6415	3.41629	1.58528	2.44793	1.61936	1.49268	0.402537	0.148522	1.4694	0	0				7.204	8.731	16.234	90	90	90	1021.09		ASALIP_clean
ASALOV_clean		0	0					0.274599	0.347908	0.144226	0.270423	0.0976172	0.07158	0.222017	0	0					0.13341	-0.00592395	-2.07597	0.273146	0.320469	0.153532	0.271359	0.101554	0.0770002	0.218865	0	0				14.017	13.505	12.5051	90	116.317	90	2121.86		ASALOV_clean
ASAMUE_clean	Z>86	0	0												NA	NA															NA	NA												ASAMUE_clean
ASANAL_clean	occupancy	681.104	566.906					0.69125	0.428708	0.875792	0.702792	0.297833	0.309986	0.13984	0	0					3.54723	5.48215	-8.3128	0.629881	0.428357	0.32356	0.644713	0.395428	0.414599	0.146198	0	0				10.966	30.592	11.9325	90	117.01	90	3566.4		ASANAL_clean
ASECUY_clean	Z>86	1022.78	711.52												NA	NA															NA	NA												ASECUY_clean
ASEJOZ01_clean		0	0					1.34422	1.66455	1.89825	1.23881	0.0878517	0.0304722	0.28868	966.892	552.973					-16.1989	1.22371	-20.8451	1.05243	1.31682	2.04496	0.918197	0.174912	0.14206	0.289895	0	0				12.869	18.093	14.5194	90	116.053	90	3037.16		ASEJOZ01_clean
ASEJOZ_clean		0	0					1.34651	1.49201	2.01574	1.26178	0.0810227	0.0310319	0.255991	902.69	513.89					-20.5941	-18.9966	-22.6912	1.70748	2.56513	1.57229	1.56806	0.458385	0.375355	0.748991	0	0				14.561	18.078	12.8449	90	116.603	90	3023.25		ASEJOZ_clean
ASEKAM_clean	occupancy	1203.13	696.813					0.554347	0.694261	0.725147	0.509284	0.195666	0.0935964	0.399807	1035.05	599.45					0.918175	12.7577	-31.1471	5.36656	5.51057	4.5909	5.41532	0.645126	0.183484	1.56841	0	0				10.608	24.651	7.23888	90	95.2948	90	1884.87		ASEKAM_clean
ASINAT_clean		1760.06	2419.61					0.16436	0.226553	0.168177	0.159929	0.0666977	0.0632063	0.101611	1737.17	2388.02					0.177084	0.283426	0.266949	0.158415	0.239033	0.170796	0.15253	0.0664681	0.0622526	0.108622	1736.86	2403.68				21.007	21.0986	21.2396	63.4767	63.6899	84.6588	7485.67		ASINAT_clean
ASINEX_clean	n= 2736	1755.12	2659.37												NA	NA		manually	18		-1.06835	1.21632	0.853638	0.327123	0.299966	0.294718	0.329645	0.0653953	0.0678099	0.0343503	NA	NA												ASINEX_clean
ASINIB_clean	n= 2736	1755.77	2636.03												NA	NA															NA	NA												ASINIB_clean
ASIQEA_clean		1336.84	1481.16					0.384591		0	0.391459	0.0577828	0.0557501	0.0882734	1354.49	1500.72					1.24549	1.24549	-6.27066	0.411733		8.88178e-16	0.419085	0.0761362	0.0730588	0.122297	1322.22	1407.52				18.001	18.001	12.946	90	90	90	4194.97		ASIQEA_clean
ASIQIE_clean		1354.94	1516.32					0.228528		0	0.232609	0.0601675	0.0590524	0.0768941	1336.04	1495.16					-0.280905	-0.280905	-17.4033	0.913053		0	0.929357	0.126617	0.115882	0.287649	1044.92	960.443				18.12	18.12	12.905	90	90	90	4237.16		ASIQIE_clean
ASIRUR_clean		0	0					0.472824	0.475871	0.370987	0.480914	0.111144	0.0445267	0.306556	0	0					-2.80914	-13.3314	4.29313	0.384648	0.456078	0.511775	0.352422	0.152504	0.120271	0.247054	0	0				10.893	6.618	17.3375	90	106.886	90	1195.97		ASIRUR_clean
ASIVAB_clean		2261.36	4201.37					0.119197	0.129745	0.0583251	0.120021	0.0805469	0.0816637	0.0735977	2285.81	4246.76					0.581053	0.776397	0.910769	0.116583	0.133679	0.0689513	0.115668	0.0800543	0.0802097	0.0790874	2271.05	4315.79				34.145	34.145	19.884	90	90	90	23182.4		ASIVAB_clean
ASIVEF_clean	occupancy	2094.16	3360.01					0.19374	0.340777	0.164756	0.167521	0.16064	0.155597	0.188937	2062.13	3308.74					0.79229	0.583022	1.91237	0.197478	0.342597	0.162812	0.171834	0.156817	0.151424	0.187077	2050.83	3399.68				34.167	34.167	19.343	90	90	90	22580.7		ASIVEF_clean
ASOHUL_clean		1374.04	1322.44					0.12149	0.115877	0.182729	0.117344	0.052497	0.0288691	0.093002	1422.4	1369.08					2.50232	-3.38963	1.03518	0.103568	0.11482	0.126181	0.093708	0.0482268	0.0471087	0.0501436	1407.52	1355.38				17.696	6.875	11.93	90	90	90	1451.4		ASOHUL_clean
ASOSUY_clean		1898.53	2115.76					0.170938	0.11503	0.10221	0.19272	0.0473889	0.0468778	0.0488043	1526.82	1701.47					0.994681	0.993601	0.692414	0.0987346	0.0711463	0.0639568	0.109569	0.0430173	0.0442978	0.0394711	1882.28	2152.45				18.518	18.5179	19.122	90	90	120	5678.71		ASOSUY_clean
ASOVEL_clean		823.499	796.583					0.341796	0.773217	0.709634	0.299925	0.0657188	0.0579768	0.176041	799.781	773.699					-0.824391	-7.40743	-3.82462	0.398778	0.962774	0.436994	0.352894	0.105423	0.10277	0.143229	617.314	527.369				8.984	10.592	32.72	90	90	90	3113.59		ASOVEL_clean
ASOYOY_clean		1889.43	2280.06					0.314866	0.197522	1.06437	0.301979	0.0881471	0.0646632	0.356908	1813.99	2189.02					-2.24339	-2.24339	-2.99939	0.424172	0.31937	1.29845	0.408058	0.111319	0.0896135	0.359733	1663.02	1860.28				22.261	22.261	32.92	90	90	90	16313.6		ASOYOY_clean
ASUBIB_clean		1250.82	822.282					0.544342	0.713928	0.901697	0.474607	0.107546	0.0454463	0.288366	1309.68	860.928					-3.178	-6.36984	-1.46518	0.730791	0.946572	1.10569	0.646376	0.131218	0.0974495	0.229545	1014.34	599.891				10.944	11.1285	15.9979	75.5691	82.9591	75.5604	1823.51		ASUBIB_clean
ASUJIJ_clean		0	0					0.243104	0.118879	0.184992	0.254894	0.04053	0.0425559	0.0255891	0	0					0.271972	-4.23542	-3.41231	0.22795	0.185707	0.198802	0.23232	0.0644013	0.0685428	0.0338573	0	0				19.377	16.277	10.7199	90	101.384	90	3314.53		ASUJIJ_clean
ASUKEE01_clean		0	0					0.331869		0.876424	0.313717	0.0724804	0.0705329	0.0929283	0	0					-11.644	2.93299	3.77779	0.264217		0.682932	0.250259	0.0680726	0.0653719	0.0964303	0	0				18.747	23.355	30.404	90	90	90	13312		ASUKEE01_clean
ASUKEE_clean		0	0					0.336116		0.879652	0.317998	0.0713573	0.0694173	0.0917265	0	0					-11.7782	2.90334	3.73006	0.266869		0.684335	0.252953	0.0670049	0.0643385	0.0950029	0	0				18.777	23.359	30.423	90	90	90	13343.9		ASUKEE_clean
ASUWUI_clean		883.558	767.744					0.239853	0.31676	0.348388	0.233455	0.0567414	0.0566065	0.0581531	877.691	762.622					-0.434803	0.257222	-3.65252	0.240301	0.34935	0.342566	0.232705	0.0667356	0.0678638	0.0549266	808.366	671.621				14.995	17.5334	20.2381	115.226	92.3278	105.606	4561.78		ASUWUI_clean
ATAFIK_clean		1747.42	1438.11					0.502211	0.600758	0.537856	0.443664	0.0503398	0.0254851	0.112477	1791.91	1474.59					-8.74815	1.317	1.317	0.328546	0.342008	0.393243	0.311344	0.0744949	0.0631041	0.102972	1548.78	1193.96				11.81	18.777	18.777	90	90	90	4163.92		ATAFIK_clean
ATAYAX_clean		2151.88	2752.26					0.067082	0.0217126	0.233007	0.0679969	0.0551799	0.0487936	0.0864016	2094.09	2678.38					0.562052	0.561513	0.324528	0.0680899	0.0293001	0.24861	0.066598	0.0545349	0.0483505	0.0847698	2109.04	2736.74				18.557	18.5569	24.189	90	90	119.998	7213.91		ATAYAX_clean
ATAYEB_clean		2059.44	2493.62					0.10956	0.0899374	0.0212307	0.119092	0.059752	0.0641724	0.0371584	2046.84	2478.42					2.10364	2.10473	1.06202	0.0900915	0.0761741	0.06712	0.0945853	0.0599787	0.0608782	0.0553814	2130.7	2718.2				18.435	18.4346	23.832	90	90	119.999	7014.11		ATAYEB_clean
ATEJOA_clean	occupancy	339.742	178.96			collapse		1.27459	1.85707	1.42148	1.09928	0.709689	0.628341	1.15904	0	0					-9.40647	9.01339	5.58976	1.25729	1.80463	1.08014	1.0984	0.665721	0.586179	1.10509	0	0				9.541	12.842	14.4554	116.316	109.2	90.1517	1476.06		ATEJOA_clean
ATEXII_clean		0	0					0.314158	0.26167	0.456319	0.312467	0.0636456	0.0562325	0.104006	0	0					-0.832055	-3.36624	-0.404862	0.181276	0.207273	0.310088	0.173058	0.0674075	0.0632537	0.0900226	0	0				10.949	11.731	21.686	90	90	90	2785.41		ATEXII_clean
ATEYED_clean		3139.83	6711.67					0.138888		0.00021099	0.141055	0.0669761	0.0644809	0.11189	3026.7	6469.81					-1.3753	-0.196591	0.0545543	0.131585		0.00021099	0.133638	0.0726324	0.0702324	0.115832	3002.31	6305.66				28.132	12.615	24.7461	90	120.027	90	7603.39		ATEYED_clean
ATEYOP_clean	n= 1144	2289.18	3168.91												NA	NA					-1.16633	-0.905388	-2.39651	0.29423	0.388872	0.316617	0.281476	0.0879438	0.0767094	0.152758	2240.84	2965.26												ATEYOP_clean
ATEYUV_clean	n= 1144	2317.98	3085.97												NA	NA					0.506563	-1.86267	-2.04785	0.36545	0.454158	0.330513	0.354849	0.0827451	0.0730486	0.143348	2233.7	2873.11												ATEYUV_clean
ATEZAC_clean		2202.97	3203.7					0.356365	0.487418	0.421209	0.337886	0.077165	0.0718845	0.122343	2187.38	3181					-3.36685	0.0899366	-1.46087	0.366815	0.541008	0.328144	0.345274	0.0886201	0.0841621	0.126761	2185.92	3065.73				32.318	29.354	18.5231	90	104.277	90	17029.5		ATEZAC_clean
ATEZEG_clean		2244.72	2894.26					0.423167	0.487647	0.311567	0.418189	0.224106	0.236996	0.0977832	2201.83	2838.94					-2.01077	-1.02341	-0.690907	0.454229	0.560794	0.268225	0.446036	0.231232	0.243481	0.111186	2164.63	2709.43				32.485	29.089	17.6287	90	104.346	90	16138.9		ATEZEG_clean
ATEZIK_clean		2238.94	3008.14					0.471169	0.479206	0.368061	0.47246	0.221592	0.23122	0.116753	2172.61	2919.07					-3.29185	1.2118	-1.23475	0.458237	0.511922	0.338501	0.454667	0.225106	0.235209	0.1151	2170.35	2855.8				32.301	28.825	18.6923	90	104.24	90	16869.2		ATEZIK_clean
ATIBAG_clean		570.994	346.419					0.56474	0.511157	0.347721	0.672578	0.105941	0.061054	0.14634	761.111	461.731					-7.40321	-5.99511	-6.15848	0.126568	0.1197	0.0634943	0.149205	0.102429	0.133192	0.0747421	0	0				10.128	11.649	14.8603	91.6697	90	90	1752.49		ATIBAG_clean
ATIBIO_clean		0	0				NUMBER OF ATOM								0	0																				10.244	11.688	14.8989	91.1384	90	90	1783.52		ATIBIO_clean
ATIBOU01_clean		708.36	444.75					0.54989	0.504602	0.357632	0.643244	0.109975	0.0669831	0.148668	860.075	540.006					-6.76878	-5.95909	-4.69183	0.142512	0.13838	0.0525203	0.169142	0.105223	0.132633	0.0805533	0	0				10.25	11.683	15.154	91.8605	90	90	1813.75		ATIBOU01_clean
ATIBOU02_clean		703.786	442.83					0.549503	0.50489	0.354506	0.642866	0.109666	0.0661161	0.148861	850.419	535.074					-6.05081	-6.44527	-4.5016	0.13855	0.13925	0.0494277	0.160131	0.106653	0.132288	0.0835807	0	0				11.698	10.245	15.1721	90	91.6203	90	1817.59		ATIBOU02_clean
ATIBOU_clean		571.275	343.587					0.518857	0.475252	0.333473	0.608808	0.101593	0.052823	0.145487	743.671	447.311					-8.13712	-8.03609	-6.32707	0.143247	0.134431	0.0647587	0.171685	0.0944369	0.133863	0.0589531	0	0				10.095	11.705	14.7101	91.5075	90	90	1737.57		ATIBOU_clean
ATIBUA_clean		516.08	307.961					0.540614	0.488736	0.323485	0.646775	0.103467	0.0582715	0.144143	710.084	423.74					-4.84968	-4.79816	-4.47096	0.126565	0.141678	0.0405437	0.132957	0.0977222	0.103863	0.0921955	0	0				10.005	11.519	14.9614	91.2294	90	90	1723.87		ATIBUA_clean
ATICAH_clean		686.953	430.652					0.521968	0.480713	0.354391	0.605119	0.106002	0.0448296	0.161057	890.537	558.297					-6.75743	-5.8877	-5.63216	0.186838	0.17041	0.0623084	0.234398	0.0909226	0.107293	0.0761896	0	0				10.162	11.655	15.2941	91.1502	90	90	1811.04		ATICAH_clean
ATICEL_clean		623.058	387.008					0.531791	0.494151	0.363414	0.611526	0.0908562	0.0245541	0.150528	835.131	518.766					-8.42442	-7.2722	-6.19546	0.150932	0.138379	0.0585106	0.18659	0.0826848	0.101885	0.0654044	0	0				10.196	11.834	14.8742	90.9823	90	90	1794.45		ATICEL_clean
ATIJUJ_manual		1187.44	1576.11					1.39948	2.77682	2.3859	1.19164	0.220061	0.0673908	0.846009	1167.68	1549.82					-12.1999	5.9858	5.96281	0.649583	0.448363	0.225322	0.695511	0.132278	0.093913	0.289575	1104.22	1452.68				6.263	23.9283	23.9281	60.7513	84.9939	95.006	3081.82		ATIJUJ_manual
ATIRUS_clean		0	0					2.66035	2.13589	1.67272	3.01985	0.0841281	0.0365296	0.185275	868.788	423.867					-3.59095	-8.13488	-12.7125	0.911195	1.10893	1.25989	0.777709	0.217227	0.208348	0.236096	0	0				26.291	13.576	6.76213	90	92.441	90	2411.39		ATIRUS_clean
ATIXAE_clean		1587.4	1469.31					0.428351	0.794764	0.398179	0.372754	0.0642235	0.0542337	0.117502	1436.89	1330.03					-10.5331	-6.31294	-1.03606	0.368811	0.887841	0.314506	0.290353	0.117757	0.0928023	0.250847	716.298	550.322				8.322	15.432	28.6469	90	93.4482	90	3672.32		ATIXAE_clean
ATIXUX_clean		608.512	392.466					0.0953895	0.167779	0.00811208	0.0767147	0.0613472	0.0441444	0.108655	571.792	368.783					-11.9146	-1.83258	-3.24433	0.172461	0.159861	0.114881	0.180259	0.0866113	0.0937115	0.0670858	0	0				8.104	27.066	20.423	90	90	90	4479.64		ATIXUX_clean
ATOGEV_clean	metalvsorganic	1076.72	665.534					1.01811	1.03325	0.414529	1.22176	0.167891	0.215477	0.104444	0	0					-8.57641	-21.347	-36.5003	2.38571	2.25433	2.61285	2.4976	0.920294	0.790295	1.09363	0	0				9.914	14.441	14.9788	90	98.8869	90	2118.74		ATOGEV_clean
ATOWIQ_clean		1635.35	1886.77					0.405005	0.245994	0.158698	0.44029	0.0658864	0.0695195	0.0475295	1658.35	1913.22					0.217762	0.217762	-0.601002	0.188242	0.146122	0.124121	0.197534	0.0656774	0.0707143	0.0402281	1639.77	1871.53				13.822	13.8223	14.3757	61.9192	61.9187	79.7104	2134.68		ATOWIQ_clean
ATOWOW_clean		1613.5	1864.25					0.192761	0.104666	0.115592	0.209417	0.0626065	0.0685467	0.0325929	1607.41	1857.12					0.238266	0.237555	0.242509	0.138167	0.0815394	0.094383	0.14859	0.0601299	0.0659313	0.0308178	1599.37	1853.3				14.06	14.0598	14.3494	60.9749	60.976	83.892	2137.76		ATOWOW_clean
ATULIM_clean		404.91	230.318					0.0882401	0.0592393	0.0307636	0.0993539	0.0448164	0.052039	0.0217041	375.026	213.325					-1.46095	-0.114638	-5.05479	0.184305	0.168793	0.110247	0.193581	0.0733872	0.0806572	0.0501233	304.031	161.611				15.983	16.399	6.242	90	90	90	1636.06		ATULIM_clean
ATUXIY_clean		1132.98	726.078					0.310052	0.526714	0.381035	0.227795	0.122054	0.0548216	0.26245	1139.8	730.465					1.07806	-2.8478	-6.44783	0.377082	0.588163	0.489898	0.294324	0.159704	0.0929913	0.299016	0	0				23.06	11.005	20.9501	90	106.368	90	5101.14		ATUXIY_clean
ATUXOE_clean		0	0					0.825409	0.72214	0.588019	0.884217	0.130192	0.0434861	0.270004	0	0					-1.72868	-19.5708	-5.1242	0.7679	0.871613	0.542596	0.749163	0.206136	0.175987	0.254753	0	0				11.072	12.6758	16.0225	100.291	105.883	95.9274	2100.37		ATUXOE_clean
ATUXUK_clean		0	0					0.488674	0.492957	0.467207	0.488958	0.117767	0.0412241	0.244357	0	0					-2.40086	-16.7155	-3.60257	0.607598	0.703576	0.400547	0.590132	0.171362	0.149124	0.208141	0	0				11.025	12.6048	16.0082	100.236	106.069	95.7233	2077.44		ATUXUK_clean
ATUYAR_clean		0	0					0.617958	0.518699	0.53943	0.659311	0.118102	0.041449	0.243892	0	0					-1.24511	-16.5521	-4.55008	0.670043	0.744475	0.535041	0.655892	0.181918	0.14929	0.235462	0	0				11.003	12.4861	15.9247	100.09	106.028	95.764	2044.48		ATUYAR_clean
ATUZEW_clean		1616.79	1668.64																		-1.02823	-0.0395885	-15.4923	2.31206	0.703271	0.52927	2.68561	0.492706	0.529212	0.216886	0	0												ATUZEW_clean
AVAGIP_clean		585.306	416.739					0.183937		0.357079	0.17899	0.0593144	0.0617032	0.0290562	566.177	403.135					1.05164	1.05132	-4.62946	0.18841		0.284345	0.185669	0.0617124	0.0640536	0.0320578	533.174	369.7				31.37	31.37	7.847	90	90	90	7722.05		AVAGIP_clean
AVAGOV_clean		573.385	408.189					0.21544		0.521599	0.206693	0.0633165	0.0631181	0.0658301	584.552	416.123					2.16868	2.16739	-8.52893	0.246637		0.401341	0.242217	0.0678964	0.068126	0.0649882	491.978	334.406				31.065	31.065	8	90	90	90	7720.27		AVAGOV_clean
AVAGUB_clean		688.421	514.563					0.162812		0.51641	0.152709	0.0647325	0.0634972	0.0803793	649.039	485.128					1.10594	1.12129	-7.48674	0.175247		0.424525	0.168124	0.0686823	0.068993	0.0647477	482.079	340.82				22.813	22.813	7.788	90	90	90	4053.13		AVAGUB_clean
AVAJUE_clean	n= 2288	1022.8	6232.14												NA	NA					0.44459	0.44459	0.44459	0.148319	0.26245	0.0597267	0.139696	0.0701739	0.064664	0.112558	1040.85	6427.09												AVAJUE_clean
AVAKAL_clean		1290.64	6222.52					0.136853	0.125474	0.0446287	0.140082	0.0841953	0.0815862	0.113185	1312.23	6326.6					0.107636	0.107072	0.107636	0.136059	0.126112	0.0475566	0.139066	0.0838672	0.0811119	0.114481	1309.72	6334.85				35.49	35.49	35.49	90	90	90	44701.1		AVAKAL_clean
AVAKEP_clean		1435.42	5859.02					0.0992699	0.0289729	0.056817	0.104981	0.0634935	0.0655371	0.0335199	1464.48	5977.62					0.798305	0.79887	0.798305	0.0946459	0.0422926	0.0794731	0.0986092	0.0610504	0.0619708	0.0475512	1444.56	6038.69				35.4	35.4	35.4	90	90	90	44361.9		AVAKEP_clean
AVALEO_clean		0	0					0.595764	1.04581	0.0527574	0.564946	0.111623	0.0787748	0.354699	0	0					-5.71937	-3.81857	-8.67322	0.482484	0.883152	0.859315	0.442758	0.18273	0.146578	0.450256	0	0				15.458	14.22	14.2445	90	99.8386	90	3085.07		AVALEO_clean
AVAQIX01_clean		0	0					0.711358	1.00708	0.595843	0.662841	0.0730226	0.0464145	0.159499	636.35	479.18					-3.88852	-19.378	3.47671	1.49369	1.35882	0.486451	1.56399	0.209339	0.179372	0.306733	0	0				12.246	15.458	18.845	90	90	90	3567.33		AVAQIX01_clean
AVAQIX_clean		0	0					0.51039	0.554013	0.230403	0.515186	0.0733945	0.05309	0.139384	701.053	536.375					-0.55674	-1.27056	-0.334676	0.09729	0.0849907	0.16141	0.0966117	0.0662832	0.0598891	0.087064	0	0				12.34	15.505	18.944	90	90	90	3624.59		AVAQIX_clean
AVEHAM_clean		264.294	218.439					0.30907	0.190262	0.0597471	0.322741	0.0750591	0.0721188	0.107135	0	0					-6.14175	2.10361	-1.19441	0.545246	0.2929	0.0368804	0.573883	0.10369	0.099802	0.14611	0	0				12.656	9.241	25.5444	90	96.1576	90	2970.29		AVEHAM_clean
AVELOD_clean		1507.43	1647.03					0.173297	0.349366	0.299567	0.1588	0.0894831	0.0815137	0.145269	1456.77	1591.68					1.58766	1.58766	1.26201	0.156812	0.322801	0.279109	0.143046	0.0869684	0.0759318	0.164224	1495.71	1707.81				13.756	13.756	25.531	90	90	90	4831.17		AVELOD_clean
AVELUJ_clean		1532.35	1697.55					0.205948	0.155839	0.0845262	0.212664	0.0764865	0.0796886	0.0540719	1501.27	1663					-0.0610931	-0.0610931	-0.0105746	0.204913	0.149766	0.0777095	0.21211	0.0767952	0.0800376	0.0540988	1498.88	1658.27				13.749	13.749	25.533	90	90	90	4826.63		AVELUJ_clean
AVEMAQ_clean		1525.37	1681.27					0.324771	0.252141	0.0677455	0.336961	0.101412	0.10668	0.0634875	1488.15	1640.32					-1.19496	-1.19496	0.0145292	0.319184	0.226092	0.0955765	0.331602	0.106577	0.111381	0.0719861	1457.73	1568.78				13.733	13.733	25.466	90	90	90	4802.77		AVEMAQ_clean
AVEQID_clean		2062.3	2573.84					0.38881	0.500696	0.969283	0.331629	0.0648593	0.0429868	0.200781	2089.54	2607.86					0.810679	-1.83791	2.63585	0.415682	0.536548	0.944107	0.359714	0.0688783	0.0479508	0.198928	2099.49	2650.06				12.496	15.316	24.254	90	102.303	90	4535.34		AVEQID_clean
AVESAW_clean		0	0					0.125118		0.132063	0.124539	0.0549681	0.0463109	0.0753381	0	0					-1.4398	-6.27516	-4.80484	0.17314		0.118204	0.177717	0.0861828	0.1076	0.0357887	0	0				10.342	13.415	17.5673	90	107.119	90	2329.27		AVESAW_clean
AVESOL_clean		2028.57	2125.19					0.32935	0.399814	0.290003	0.312517	0.0564403	0.0435563	0.11313	1760.22	1844.09					0.222945	-1.5596	-2.28802	0.396719	0.496477	0.311869	0.374654	0.064558	0.052742	0.116548	1720.46	1737.83				16.148	12.516	19.8684	90	93.3211	90	4008.83		AVESOL_clean
AVESUR_clean		1793.96	1514.43					0.175638	0.22259	0.41338	0.146106	0.0774262	0.0482847	0.169014	1868.68	1577.46					-0.991512	-3.912	-1.58071	0.163291	0.206042	0.306993	0.14095	0.0805878	0.0592746	0.147572	1524.6	1205.08				29.218	11.191	22.983	90	90	90	7514.95		AVESUR_clean
AVETAY_clean		869.519	857.762					0.189311	0.202726	0.344909	0.180345	0.118656	0.10134	0.20697	793.392	782.673					-1.38287	-1.37222	-0.0735604	0.214223	0.240703	0.325311	0.204263	0.120907	0.106743	0.193142	721.757	692.005				28.166	28.166	9.72	90	90	90	7711.1		AVETAY_clean
AVETEC_clean		0	0					0.809182	1.29764	0.60936	0.654687	0.235616	0.133763	0.664853	1456.4	1218.94					0.0790554	0.878166	4.82744	0.623601	0.989187	0.81971	0.493568	0.198173	0.124092	0.510371	1498.13	1327.02				29.22	29.22	9.388	90	90	90	8015.55		AVETEC_clean
AVETOM_clean	occupancy	0	0												NA	NA		manually	108		-10.9663	1.07736	20.9857	1.57796	1.42536	1.52193	1.60184	0.383819	0.39475	0.300744	NA	NA												AVETOM_clean
AVEVEE_clean		0	0					0.194053	0.288897	0.0653969	0.176612	0.0512768	0.0428849	0.0839119	0	0					-9.53917	0.513189	-7.32252	1.38458	1.07476	1.28504	1.47043	0.22014	0.130869	0.567306	0	0				9.867	10.4247	12.44	111.316	102.568	93.8612	1148.3		AVEVEE_clean
AVIHIY_clean		1370.54	845.368					0.177984	0.176722	0.239838	0.173461	0.0378644	0.0367907	0.0402801	1354.5	835.469					0.150171	0.150171	-2.75079	0.198548	0.21236	0.247922	0.187528	0.0446434	0.0485296	0.0358992	1329.92	800.141				10.255	10.255	14.494	90	90	90	1524.26		AVIHIY_clean
AVIHOE_clean		1382.1	831.204					0.168637	0.172331	0.217078	0.162753	0.0338628	0.0329158	0.0359936	1363.38	819.969					0.460784	0.454902	-2.58128	0.186103	0.198231	0.227482	0.176591	0.0370864	0.0399576	0.0306261	1349.7	798.025				10.2	10.2	14.439	90	90	90	1502.23		AVIHOE_clean
AVILEY_clean	n= 1156	1584.39	2422.32					0.0969964	0.124878	0.163485	0.0879682	0.081881	0.0627352	0.128234	1591.94	2433.91					0.180581	0.180581	0.180581	0.097092	0.123117	0.165767	0.088241	0.0815986	0.0618873	0.129321	1590.3	2444.54				38.321	38.321	38.321	90	90	90	56274.4		AVILEY_clean
AVIMIC_clean		505.097	332.592					0.120395	0.109719	0.127254	0.121829	0.0521544	0.0535405	0.0415855	468.775	308.681					-5.83468	-3.22249	-0.976306	0.341529	0.644122	0.651247	0.280725	0.0800714	0.0793561	0.0855256	207.511	119.215				23.482	16.723	7.70687	90	104.718	90	2927.1		AVIMIC_clean
AVIMOI_clean		825.804	673.49					0.353195	0.233898	0.38333	0.368387	0.057148	0.0547756	0.0778222	686.122	559.56					1.93945	-1.25644	-1.66116	0.230623	0.287109	0.428366	0.215115	0.0598789	0.0578667	0.0774133	817.234	659.179				9.324	14.4537	26.939	90	90	93.0697	3625.26		AVIMOI_clean
AVIMUO_clean		0	0					0.770876	0.510801	0.298844	0.831369	0.0855488	0.0563327	0.308322	0	0																				8.68	13.9277	28.708	90	90	90.9092	3470.14		AVIMUO_clean
AVIPAX_clean		1664.26	1726.75					0.425307	0.519962	0.37056	0.395864	0.0515562	0.0320885	0.106309	1687.92	1751.41					-3.85691	7.01357	-2.78097	0.368003	0.449723	0.456652	0.330227	0.0677067	0.0534771	0.107728	1578.09	1636.55				11.193	12.348	28.6738	98.8168	90	90	3916.21		AVIPAX_clean
AVIPOL_clean		1430.8	1523.49					0.585566	0.394971	0.341724	0.677041	0.0573551	0.03949	0.11095	1480.4	1576.29					-14.8499	-14.3736	9.06515	1.26988	1.05629	1.46002	1.33026	0.209619	0.195101	0.253172	892.451	712.086				13.744	14.289	14.1175	90	104.912	90	2679.14		AVIPOL_clean
AVITUU_clean		1464.18	2059.61					0.22676		0.144902	0.228579	0.0617075	0.0594575	0.089271	1510.93	2125.37					1.12157	1.12157	1.3	0.17425		0.00641048	0.17798	0.0561471	0.0538356	0.0844635	1552.4	2261.98				22.522	22.522	33.6	90	90	90	17043.3		AVITUU_clean
AVIVAC_clean		1469.28	1994.86					0.205215		0.0959608	0.207643	0.0590915	0.0575098	0.0784669	1521.69	2066.05					0.566917	0.566917	0.2748	0.247095		0.172833	0.248745	0.056928	0.0548969	0.0818094	1538.81	2118.83				22.543	22.543	35.517	90	90	90	18049.3		AVIVAC_clean
AVIVEG_clean		1475.88	2013.35					0.196439		0.0889937	0.198827	0.0679771	0.0672435	0.0769637	1516.85	2069.26					0.519085	0.522619	0.188738	0.228704		0.148056	0.230496	0.0652852	0.0645973	0.0737128	1537.54	2123.38				22.636	22.636	35.393	90	90	90	18135		AVIVEG_clean
AVIVIK_clean		1524.77	2076.52					0.193702		0.11567	0.195436	0.0625496	0.0607798	0.0842289	1528.8	2082.02					0.1358	0.1358	0.169106	0.192824		0.131591	0.194185	0.0615469	0.0596321	0.0850029	1532.48	2096.24				22.975	22.975	34.298	90	90	90	18104.2		AVIVIK_clean
AVIVOQ_clean		1552.68	2189.52					0.216821		0.104182	0.219324	0.0687409	0.0687364	0.0687963	1578.68	2226.18					0.0189934	0.019425	-0.190375	0.218954		0.131047	0.220908	0.0692036	0.0692981	0.0680463	1580.32	2225.11				23.166	23.166	34.931	90	90	90	18746.2		AVIVOQ_clean
AVIVUW_clean		1504.35	2061.38					0.171377		0.10262	0.172905	0.0651924	0.0642661	0.0765402	1523.36	2087.42					0.307887	0.308322	0.269496	0.197477		0.141914	0.198712	0.0633139	0.0625386	0.0728107	1546.77	2138.34				22.963	22.963	34.546	90	90	90	18216.1		AVIVUW_clean
AVOSIO_charged		1080.34	1018.89					0.628123	0.604794	0.720339	0.62663	0.101445	0.0732195	0.321605	966.486	911.512					4.78172	-4.79879	-4.79838	0.512624	0.465698	0.57912	0.511938	0.123615	0.094013	0.354509	954.47	854.872				13.746	24.402	24.4022	120	90	90	7088.61		AVOSIO_charged
AVUBUP_clean	occupancy	0	0					0.593656		0.317275	0.608677	0.184959	0.172216	0.216066	0	0					-6.40875	0.183707	-3.94814	0.430548		0.205105	0.4428	0.211642	0.205213	0.227338	0	0				30.41	17.909	10.5671	90	107.099	90	5500.6		AVUBUP_clean
AVUCEA_clean		1899.66	2125.78																		-25.3139	-17.5493	-16.8717	2.17247	2.31056	2.39188	2.11018	0.346342	0.365907	0.287647	0	0												AVUCEA_clean
AVUDAX_clean		0	0					0.234193		0.0502518	0.23773	0.0679205	0.0609995	0.170582	0	0					1.68773	-0.726557	1.56715	0.15453		0.0254002	0.157013	0.0633228	0.0577558	0.145899	1171.51	1210.06				13.201	16.764	23.0349	105.557	90	90	4910.9		AVUDAX_clean
AVUHIJ_clean	occupancy	0	0					0.733455	0.856297	0.651835	0.730417	0.312449	0.32285	0.119154	0	0					-1.50694	-3.29524	-4.73377	0.617983	0.76928	0.509212	0.614394	0.347109	0.359947	0.108551	0	0				17.519	10.08	22.931	90	98.7188	90	4002.63		AVUHIJ_clean
AVUJIL_clean		0	0					0.270916	0.291572	0.225371	0.262661	0.117644	0.0384691	0.228489	0	0																				8.619	17.959	8.1348	90	110.832	90	1176.86		AVUJIL_clean
AVUPIR_SL		0	0					0.720152	0.26214	0.000562222	0.811406	0.044118	0.0370845	0.0956967	0	0					-0.830376	-1.82398	-2.8201	0.723054	0.229959	0.000907997	0.819914	0.0473666	0.038101	0.115314	0	0				11.946	11.9463	11.9463	113.139	113.142	113.142	1098.64		AVUPIR_SL
AWAGEL_clean		1079.6	1089.47					1.63616		3.6159	1.60017	0.0991958	0.0610069	0.875705	1016.94	1026.23					2.60913	3.32535	-0.959333	0.275386		1.20141	0.258549	0.0953798	0.0604755	0.805101	1120.82	1188.4				9.266	14.913	27.2481	98.2523	90	90	3726.26		AWAGEL_clean
AWAGOV_clean		640.231	557.343					0.199515	0.09662	0.144609	0.203789	0.062443	0.0591872	0.0993423	643.2	559.928					0.560848	0.560402	-0.702174	0.150487	0.133285	0.131013	0.15137	0.0594247	0.0582532	0.0727006	620.897	542.751				22.466	22.466	13.387	90	90	90	6756.7		AWAGOV_clean
AWAHAI_clean	Z>86	0	0												NA	NA															NA	NA												AWAHAI_clean
AWAHEM_clean	Z>86	1500.78	695.385												NA	NA															NA	NA												AWAHEM_clean
AWAJIT_clean		0	0					0.156175	0.091696	0.17819	0.158474	0.0589114	0.0575588	0.0758188	0	0					-0.47144	-0.463027	0.285208	0.15817	0.0987405	0.185489	0.160138	0.060141	0.0590203	0.0741498	0	0				9.142	25.938	20.3006	90	101.891	90	4710.49		AWAJIT_clean
AWAKEQ_clean		0	0					0.231279	0.130873	0.51391	0.232979	0.0721965	0.067275	0.120181	0	0					-7.79719	0.345294	0.773319	0.270019	0.149996	0.515153	0.273376	0.093069	0.0901437	0.12159	0	0				10.108	13.669	28.863	90	99.5025	90	3933.17		AWAKEQ_clean
AWAREV_clean	occupancy	466.168	248.636					0.617488		0.00925756	0.660934	0.496307	0.614606	0.0231112	0	0					0.10267	1.5849	-2.62928	0.600348		0.0625574	0.638762	0.325632	0.398033	0.0360292	0	0				18.506	18.5063	9.917	90	90	119.999	2941.36		AWAREV_clean
AWARIZ_clean	occupancy	464.76	247.448					0.620508		0.0044004	0.664516	0.497192	0.615614	0.0235059	0	0					1.39579	-0.0210258	-2.33961	0.600246		0.0735143	0.637869	0.324847	0.397538	0.0340858	0	0				18.549	18.5488	9.854	90	90	119.999	2936.19		AWARIZ_clean
AWASAU_clean		676.183	285.473															manually	39		-19.5579	-9.27387	-46.6384	8.783	8.24451	8.90478	8.85386	1.16635	0.738361	1.67215	0	0												AWASAU_clean
AWASEY_clean		1800.61	1555.31																		1.95536	3.06683	-0.365141	0.442646	0.556609	0.400163	0.429535	0.123688	0.0658445	0.19851	1826.85	1649.05												AWASEY_clean
AWASOI_clean		689.066	291.769															manually	41		10.94	120.503	6.80135	9.19988	9.08993	9.27464	9.2076	1.03844	0.684369	1.47221	1067.78	766.77												AWASOI_clean
AWAWUR_clean		1415.1	1440.37					0.249763	0.280847	0.399573	0.233936	0.0740969	0.0500195	0.173617	1429.14	1454.73					-3.02409	-3.02458	-3.02458	0.207686	0.234127	0.258598	0.198814	0.0951799	0.0817422	0.150722	1339.11	1240.64				20.294	20.2941	20.294	85.0058	85.0049	85.0049	8268.05		AWAWUR_clean
AWEBIO_charged	Z>86	0	0												NA	NA															NA	NA												AWEBIO_charged
AWEDOW_charged		818.251	771.688					0.487587	0.297076	0.135296	0.496272	0.0672058	0.0666299	0.0769963	977.843	922.152					-5.83878	0.701938	-0.582421	0.39826	0.231304	0.179622	0.40443	0.0834719	0.0838785	0.0765607	886.813	788.425				9.905	27.766	28.33	90	90	90	7791.38		AWEDOW_charged
AWEDUC_charged		0	0					0.215123	0.359645	0.149029	0.211771	0.0670541	0.0627724	0.128283	0	0					-2.0856	-1.08787	0.273708	0.195661	0.298012	0.14301	0.193374	0.073504	0.0707009	0.113588	0	0				7.911	14.257	29.557	90	90	90	3333.65		AWEDUC_charged
AWEGEP_clean	Z>86	0	0												NA	NA															NA	NA												AWEGEP_clean
AWEJIW_clean		1141.18	955.963					3.0431	4.03641	4.69678	2.77934	0.101256	0.0564897	0.28032	906.638	759.469					-27.1444	-3.38315	-1.43095	1.29569	1.06452	0.646816	1.36945	0.164041	0.11434	0.362843	575.665	325.763				7.142	21.2107	22.1814	62.412	81.3919	89.5381	2937.39		AWEJIW_clean
AWEVIJ_clean	n= 1704	1451.22	1942.18												NA	NA		manually	63		-0.938465	6.2404	-2.43486	1.94958		1.8685	1.95035	0.107328	0.106779	0.1211	NA	NA												AWEVIJ_clean
AWEWOP_clean	occupancy	1390.52	1252.42					0.547171	0.358159	0.208463	0.583663	0.2346	0.250552	0.0821631	1249.83	1125.73					2.32614	2.84293	2.55767	0.633243	0.403831	0.191899	0.678543	0.238387	0.256493	0.0653789	1295.88	1243.08				23.941	18.794	19.8973	90	124.959	90	7337.32		AWEWOP_clean
AWEZOS01_clean	n= 1564	0	0												NA	NA					0.282302	1.52282	-5.09707	0.347793		0.53315	0.339367	0.0879977	0.0692142	0.225744	0	0												AWEZOS01_clean
AWEZOS_clean	n= 1564	0	0												NA	NA					0.391226	1.88113	-5.53319	0.326931		0.522954	0.318021	0.0879957	0.0693947	0.224402	0	0												AWEZOS_clean
AWIBAK_clean	n= 1564	0	0												NA	NA					0.413211	1.42007	-5.07873	0.347856		0.532573	0.339459	0.0873342	0.0685802	0.224864	0	0												AWIBAK_clean
AWIBAL_clean		692.715	410.359					0.323215	0.295868	0.305762	0.33125	0.0992132	0.0655481	0.197148	738.645	437.555					2.00558	-16.5707	-0.979313	0.663515	0.964699	0.705393	0.580816	0.250846	0.150466	0.542863	0	0				10.067	10.3562	10.5378	103.158	115.526	92.5458	952.581		AWIBAL_clean
AWIBEO_clean	n= 1564	0	0												NA	NA					-0.0529629	2.37301	-4.83755	0.328509		0.505834	0.320449	0.081424	0.0671498	0.194476	217.988	135.561												AWIBEO_clean
AWIBIS_clean	n= 1564	0	0												NA	NA					0.216338	1.5516	-3.75164	0.274258		0.490851	0.264413	0.0855383	0.0667514	0.223309	209.933	132.005												AWIBIS_clean
AWOFOI_clean		1714.49	1299.76					0.510091	0.650428	0.306959	0.45685	0.104958	0.033722	0.239932	1751.42	1327.67					-5.40498	0.938825	-2.44931	0.530443	0.654037	0.376238	0.481496	0.133449	0.0673842	0.258625	1510.43	1068.91				10.699	12.196	13.677	90	90	101.574	1748.36		AWOFOI_clean
AWOHIF_clean		1655.99	2493.26					0.557		0.60722	0.554718	0.0872551	0.0668471	0.283172	1565.51	2357.04					-2.51463	0.23597	-0.504419	0.470773		0.575706	0.466003	0.0929265	0.0724358	0.289638	1615.89	2365.32				11.962	11.315	36.656	90	90	90	4961.39		AWOHIF_clean
AWOKED_clean	occupancy	0	0			collapse		1.16741	1.00282	0.932251	1.21444	0.885339	1.02121	0.277152	0	0					-5.56019	4.5868	-2.82476	0.87082	0.554202	0.70399	0.942864	0.620605	0.734014	0.112964	0	0				16.17	15.104	7.98582	90	92.8423	90	1947.99		AWOKED_clean
AWUPAL_clean		1727.74	4956.91					0.0796494	0.0780103	0.0461491	0.0804617	0.054364	0.0542081	0.0554105	1741.72	4997.05					0.0911038	0.114094	0.137966	0.0824373	0.0845971	0.0468049	0.082901	0.054915	0.0540186	0.0609334	1738.68	5005.43				23.49	23.489	31.965	90	90	90	17636.9		AWUPAL_clean
AWUPOZ_clean	occupancy	1741.97	4928.93					0.0991902	0.0848761	0.000315862	0.102517	0.0661797	0.0668737	0.0616923	1754.91	4965.42					-0.141739	0.0591605	0.42349	0.104733	0.0964285	0.0382816	0.106836	0.0681655	0.0665946	0.078324	1751.74	4973.44				23.494	23.495	31.972	90	90	90	17648.3		AWUPOZ_clean
AXAFAG_clean	Z>86	1428.99	505.792												NA	NA															NA	NA												AXAFAG_clean
AXAQAT_clean		0	0					0.237433		0.638476	0.170593	0.0773915	0.0471143	0.112715	0	0					-0.450252	-4.95852	-4.22697	0.257918		0.625667	0.196627	0.0866987	0.0883623	0.0847577	0	0				6.734	12.536	9.12053	90	118.622	90	675.845		AXAQAT_clean
AXAWUT_clean		0	0					1.74136	1.58352	1.69133	1.8401	0.198105	0.0449447	0.443163	0	0		manually	12		-40.5295	-9.64735	-2.83995	2.65343	2.53636	2.49481	2.74096	0.633045	0.632267	0.634291	0	0				11.311	12.67	14.74	90	90	90	2112.39		AXAWUT_clean
AXIGAR_clean	occupancy	1876.72	2429.83					1.54539		1.25452	1.56777	0.181128	0.146829	0.27974	2406.38	3115.56					-16.7143	-17.3863	-7.70648	1.18391		0.750473	1.21725	0.234822	0.274199	0.121614	0	0				23.984	7.327	22.6806	90	94.4252	90	3973.8		AXIGAR_clean
AXIMUP_clean		2091.44	2790.96					2.16544	1.58592	1.34542	2.22579	0.14542	0.087675	0.754367	1641.35	2190.24					-3.9186	-9.38354	-7.14082	0.710938	0.908356	0.919572	0.69174	0.200902	0.167932	0.548584	1485.7	1606.54				10.83	16.713	28.0855	90	94.9676	90	5064.43		AXIMUP_clean
AXINAX01_clean		1502.82	3738.36					0.238852	0.39399	0.348933	0.211884	0.0743558	0.0598902	0.166574	1492.25	3711.94					-0.808358	-0.830822	-0.860053	0.174105	0.331551	0.243201	0.148596	0.0747689	0.0631431	0.148883	1513.7	3678.17				28.935	28.9349	33.1837	86.1514	86.1519	76.6928	26937.3		AXINAX01_clean
AXINAX_clean	occupancy	1390.25	3273.94												NA	NA					-2.43263	8.66479	-5.8287	0.840801	1.05825	0.80812	0.80908	0.393061	0.383082	0.475305	1425.11	3246.61												AXINAX_clean
AXINEA_clean		0	0					0.086033	0.0546118	0.00112496	0.0930388	0.05625	0.0621909	0.0164114	0	0					-1.92107	-1.36814	-0.978335	0.115265	0.0564585	0.0242933	0.126961	0.0690353	0.0747927	0.0304271	0	0				15.424	25.429	30.787	90	90	90	12075.2		AXINEA_clean
AXINIF_clean		1979.14	2636.54					0.148138	0.230383	0.251797	0.131707	0.0695291	0.0575929	0.141146	1915.15	2551.28					-2.68646	-1.10412	-2.8017	0.173301	0.214559	0.225553	0.165049	0.0879652	0.0787602	0.143195	1740.68	2169.12				17.551	21.148	25.356	90	90	90	9411.35		AXINIF_clean
AXIPEE01_clean		1486.84	990.717					0.112135		0.127692	0.110838	0.0668925	0.0508354	0.116524	1483.9	988.836					-5.21131	-6.8076	-0.407557	0.142705		0.131699	0.143622	0.104668	0.0934206	0.139433	1017.27	596.078				15.014	14.925	31.4561	90	98.2063	90	6976.63		AXIPEE01_clean
AXIPEE02_clean		1160.32	709.958					0.11666		0.116054	0.11671	0.0533242	0.049189	0.0661058	1115.59	682.614					-3.55715	-3.06802	-2.36224	0.147591		0.127117	0.149297	0.0752586	0.0756779	0.0739627	0	0				43.108	14.632	32.3211	90	109.491	90	19218.5		AXIPEE02_clean
AXIPEE03_clean		1218.27	755.288					0.115673		0.120904	0.115237	0.0553717	0.0475779	0.0794619	1182.86	733.34					-4.95902	-2.94394	-1.92383	0.176002		0.118801	0.180769	0.0858821	0.0846431	0.0897118	0	0				14.444	14.712	30.7721	90	96.9659	90	6490.81		AXIPEE03_clean
AXIPEE_clean		1067.38	635.015					0.0605158		0.0727845	0.0594934	0.0424528	0.0443768	0.0365057	1011.43	601.715					-2.27407	-1.95375	-0.86227	0.0898144		0.0968659	0.0892268	0.056419	0.0608025	0.0428699	835.695	471.934				14.226	14.464	30.4426	90	96.1039	90	6228.5		AXIPEE_clean
AXOCAT_clean	metalvsorganic	0	0					0.976902	1.10739	0.814208	0.807093	0.292599	0.0160138	0.439359	0	0					-10.6962	-25.7971	-16.8914	5.43482	5.45364	5.40481	5.41297	0.367805	0.428737	0.335475	0	0				8.101	12.946	12.4223	90	97.7772	90	1290.81		AXOCAT_clean
AXOCEW_clean		1124	1000.23					0.0980359	0.0529356	0.0759324	0.104568	0.0430576	0.0423345	0.0488423	1115.81	992.948					-4.80293	-0.104145	0.630647	0.151804	0.103578	0.0866868	0.160127	0.0591347	0.0621755	0.0348085	1077.66	917.788				7.292	18.82	20.5187	106.982	90	90	2693.11		AXOCEW_clean
AXOHIE_clean		0	0					0.141111	0.254947	0.153926	0.132108	0.0711876	0.0655594	0.107927	0	0					-1.88988	-0.745446	-0.479469	0.133851	0.176053	0.180445	0.129709	0.0764891	0.072349	0.103515	0	0				11.81	23.221	45.4673	104.515	90	90	12071		AXOHIE_clean
AXUBAW_manual		1698.75	2290.28					0.24495	0.118987	0.0660125	0.277634	0.0340022	0.0362348	0.0222807	1679.12	2263.75					0.519007	0.492505	0.729923	0.181119	0.0402217	0.0523844	0.21371	0.0355823	0.0382836	0.0214003	1685.58	2299.59				18.111	18.1116	18.1115	60.0005	59.9992	59.9993	4200.83		AXUBAW_manual
AXUBOL_clean		904.614	860.621					0.241905	0.196428	0.147555	0.258718	0.068019	0.0463807	0.144956	905.706	861.673					1.80236	-0.232288	2.04158	0.326051	0.26017	0.233305	0.347872	0.0702279	0.0470211	0.152741	968.815	944.956				18.77	18.7696	18.7703	109.469	109.472	109.473	5090.57		AXUBOL_clean
AXUDII04_clean		0	0					0.0558722		0	0.0651842	0.0723122	0.0865683	0.0651842	0	0					0.0715158	0.0715158	0.0715158	0.0545454		0	0.0636363	0.0710128	0.0857657	0.0636363	0	0				11.466	11.466	11.466	90	90	90	1507.43		AXUDII04_clean
AXUHAD_clean		1444.91	1823.44					0.199614	0.322735	0.203615	0.196322	0.0618478	0.0588761	0.122025	1436.04	1812.3					-4.96796	-4.96752	-4.78828	0.441793	0.854656	0.259031	0.433333	0.118123	0.11894	0.101575	1304.28	1416.64				22.613	22.613	27.6947	114.094	114.094	90	11563.1		AXUHAD_clean
AXUHEH_clean		874.04	821.058					0.286798	0.472972	0.50323	0.27289	0.0626187	0.0562447	0.164603	855.968	804.069					-2.91689	-2.06095	-2.54639	0.297334	0.358271	0.412613	0.292022	0.0887313	0.0860759	0.131218	681.689	591.468				12.726	18.7482	36.793	90	90	101.451	8603.69		AXUHEH_clean
AXUHIL_clean		0	0					0.209404	0.618795	0.548873	0.176454	0.0785327	0.0607788	0.234175	0	0					-0.311394	-1.75765	-2.64934	0.222562	0.59597	0.551779	0.192182	0.0913637	0.0780538	0.208047	0	0				14.997	20.345	22.4623	103.853	90	90	6654.21		AXUHIL_clean
AXUJOT_clean	metalvsorganic	0	0					2.41413	2.62201	2.68584	1.80152	0.64493	0.292309	0.711212	1054.04	317.317			collapse												NA	NA				13.997	14.579	14.7618	97.3269	98.4767	100.961	2887.29		AXUJOT_clean
AXUPEO_clean	metalvsorganic	0	0					0.268476	0.27687	0.416215	0.0871637	0.0832887	0.0349959	0.131581	0	0					-3.83459	-10.6177	-25.2161	1.04003	1.11991	0.815695	0.944892	0.23827	0.256761	0.219778	0	0				9.512	9.88142	12.1168	70.5345	73.4722	82.3291	1028.48		AXUPEO_clean
AYAWEE_clean		0	0					0.40597	0.355687	0.000391473	0.417218	0.0772393	0.0571863	0.273759	0	0					-2.20425	-4.43108	-5.63903	0.241438	0.21537	0.000334715	0.247955	0.116583	0.110111	0.180018	0	0				8.855	9.96931	12.9721	97.0043	97.8869	90.9311	1125.22		AYAWEE_clean
AYONOT_clean		2042.8	2248.46					1.3535	1.66921	0.00106237	1.71401	0.0810922	0.0521353	0.124528	2819.54	3103.43					-1.06388	-4.53493	-2.23822	1.58788	1.93321	0.0719118	2.00052	0.0787831	0.0941314	0.0557607	2508	2548.89				8.556	11.444	8.106	90	90	90	793.698		AYONOT_clean
AYOQEM_clean	n= 1008	2122.78	2739.86					0.128916	0.122136	0.137113	0.130099	0.0646423	0.0648237	0.0638357	2068.57	2669.88					1.06437	1.06284	1.06742	0.0953002	0.0750573	0.125114	0.0984976	0.0614625	0.0619557	0.0592709	2122.16	2823.29				45.849	45.8485	45.8487	33.4645	33.4651	33.4648	26099.4		AYOQEM_clean
AYOXUJ_clean		699.694	628.306					0.606313	0.769791	0.607621	0.597675	0.0819035	0.0726736	0.174203	816.13	732.882					-4.0817	-3.59526	-3.31975	0.40099	0.594237	0.267763	0.394325	0.115847	0.110982	0.1645	569.47	461.441				35.522	13.846	9.54819	90	103.198	90	4572.12		AYOXUJ_clean
AYOYEU_clean		0	0					0.56882	0.428711	0.355926	0.587233	0.0739142	0.0611734	0.15764	0	0					-3.7377	-3.73669	2.87876	0.474738	0.312133	0.284623	0.494751	0.0981074	0.0938232	0.126261	0	0				12.497	12.5648	15.1693	75.521	77.7484	85.4397	2252.86		AYOYEU_clean
AYOYOE_clean		0	0					0.552941	0.454238	0.331885	0.567401	0.0739095	0.0652581	0.131688	0	0					-1.81051	-2.55924	-0.809546	0.23036	0.268521	0.114647	0.230618	0.0886692	0.0806672	0.142111	0	0				10.052	12.5072	19.2087	90.3356	103.343	99.9262	2311.97		AYOYOE_clean
AYUJIP_clean	n= 1692	1295.05	1190.46												NA	NA															NA	NA												AYUJIP_clean
AYUPOZ_clean		0	0					0.500368	0.545066	0.315344	0.539694	0.153099	0.0296434	0.194251	0	0					-11.0236	-3.91457	-3.25462	0.966363	0.888412	0.85968	1.0409	0.149845	0.0997937	0.166529	0	0				10.872	10.872	8.91	90	90	90	1053.17		AYUPOZ_clean
AYUWUM_clean		0	0					1.13686	1.58983	1.62973	1.06564	0.153326	0.0419028	0.799583	0	0					-5.08092	-4.68858	-12.3939	0.721739	0.980192	1.2556	0.671384	0.239506	0.157657	0.714231	0	0				9.998	16.2158	16.6628	94.8998	102.41	96.0994	2607.06		AYUWUM_clean
AZAFIS_clean		781.616	513.579					0.733158	0.827864	0.351876	0.733363	0.171393	0.0302862	0.422249	0	0					-22.8247	-3.97953	-13.3902	1.12596	1.91792	1.92194	0.795648	0.291063	0.19397	0.463673	0	0				7.783	10.1303	10.3279	103.873	91.7977	90.9333	789.914		AZAFIS_clean
AZAVOO_clean		296.149	292.289					0.484093	0.730814	1.81362	0.428573	0.0842716	0.0526504	0.407511	768.887	758.862					-5.64757	1.32625	-1.73249	0.366562	0.630481	1.64294	0.310863	0.116417	0.0851288	0.436256	674.561	627.295				11.858	28.064	16.7333	90	96.8749	90	5528.52		AZAVOO_clean
AZAVUU_clean		878.019	740.955					1.06036	1.03369	1.20106	1.05826	0.0705304	0.0518629	0.199767	715.94	604.177					-6.05026	1.09012	-1.88563	0.954767	0.97512	1.22005	0.941262	0.0914742	0.0756913	0.200741	594.73	467.675				11.54	16.778	28.468	90	90	90	5511.92		AZAVUU_clean
AZAWAB_clean		961.74	864.03					0.507465	0.539423	0.425125	0.50672	0.0628164	0.0499284	0.156641	627.161	563.456					-10.4057	-3.36584	0.57497	0.733603	0.820364	0.673774	0.72512	0.139274	0.117423	0.298351	578.595	459.377				12.633	17.4722	27.9667	91.2745	92.4326	106.099	5921.84		AZAWAB_clean
AZAWAZ_clean	Z>86	0	0												NA	NA															NA	NA												AZAWAZ_clean
AZEBUE_clean		863.501	474.9					0.262292	0.255838	0.243175	0.266577	0.0429452	0.0292325	0.0710922	770.218	423.583					-7.17454	-37.8005	3.98	1.26435	1.63803	1.65892	1.06904	0.401809	0.20219	0.811554	0	0				17.293	10.052	17.658	90	90	90	3069.48		AZEBUE_clean
AZEWEH_clean	metalvsorganic	0	0					1.44046	1.41878	1.3663	1.51578	0.298514	0.051889	0.462931	813.27	332.533					-21.9095	-7.83358	-13.8878	1.06161	1.03336	0.857997	1.19541	0.343756	0.292866	0.377682	0	0				6.621	11.7942	12.2067	90.8451	100.579	102.447	913.522		AZEWEH_clean
AZILEA_clean		0	0																																									AZILEA_clean
AZILEC_clean		0	0					0.26411	0.216699	0.226097	0.271224	0.101427	0.100686	0.105393	0	0					-0.00342583	-5.34772	0.430501	0.284801	0.188683	0.206552	0.299261	0.105299	0.107096	0.0956724	0	0				14.595	13.344	21.324	90	90	90	4152.97		AZILEC_clean
AZIMIH_clean		0	0					0.447886	0.567462	0.409417	0.40651	0.0419441	0.0389141	0.0529621	785.697	540.94					-3.82958	-11.3507	1.01529	0.489615	0.604907	0.556128	0.439003	0.0734387	0.085111	0.0309941	0	0				19.587	19.16	17	90	93.2913	90	6369.35		AZIMIH_clean
AZIVAI_clean		2548.16	3734.02					0.0940775		1.25607e-15	0.0966908	0.0519168	0.0490956	0.0801284	2524.15	3698.83					2.45307	2.45307	2.60903	0.104663		0	0.10757	0.0561034	0.0524982	0.0921554	2508.1	3958.49				13.636	13.636	19.467	90	90	90	3619.7		AZIVAI_clean
AZIXUD_clean		1576.64	1427.3					0.367292	0.468047	0.429807	0.337637	0.0484581	0.0351898	0.116695	1523.92	1379.48					-1.97136	0.170027	-0.520187	0.227571	0.292834	0.533036	0.189436	0.0515593	0.0370987	0.125928	1480.99	1309.67				11.256	13.174	20.396	90	90	90	3024.45		AZIXUD_clean
AZOBUN_clean		0	0					0.348687	0.603627	0.51311	0.302964	0.0667162	0.0495266	0.152664	0	0					-2.19255	-2.98727	-10.3786	0.523638	0.574213	0.183434	0.525752	0.145944	0.145222	0.149551	0	0				10.146	10.8724	13.7554	79.1223	78.8457	86.3191	1461.36		AZOBUN_clean
AZOHEC_clean	occupancy	0	0					0.300808	0.132269	0.187611	0.350242	0.141934	0.15699	0.0789727	0	0					0.698994	-1.34884	-0.820125	0.309076	0.1503	0.21601	0.354618	0.145376	0.162708	0.0728975	0	0				14.364	12.003	16.9976	90	113.38	90	2689.95		AZOHEC_clean
BABREE_clean	occupancy	1952.84	2174.36					0.411786	0.418237	0.44347	0.40715	0.0720609	0.0585435	0.119838	1849.8	2059.71					-3.57293	0.765656	1.21945	0.445327	0.440123	0.439169	0.447544	0.082445	0.0701196	0.126009	1827	2012.24				22.906	24.2278	24.8147	61.7779	63.5987	77.4076	10868		BABREE_clean
BACGAQ_clean		651.421	558.567					0.227308	0.232858	0.189677	0.227556	0.066166	0.0611762	0.109827	603.435	517.402					-1.90749	-2.03463	-0.907295	0.148493	0.193967	0.152005	0.145503	0.0803484	0.0787668	0.0941876	456.359	371.796				10.312	13.9187	14.1739	88.3499	69.2875	74.7247	1830.98		BACGAQ_clean
BACMOH10_clean		0	0					0.403677	0.299396	0.247519	0.427127	0.053443	0.0381122	0.120898	0	0					-8.20147	4.86905	-2.12724	0.554023	0.719563	0.559342	0.528926	0.0680155	0.0603325	0.10182	0	0				7.465	9.622	16.049	90	90	90	1152.77		BACMOH10_clean
BACMOH_clean		0	0			collapse		5.42576	5.1023	6.17914	5.44549	3.26367	3.20017	3.42876	744.389	509.35					-60.2536	-2.58221	109.436	5.38362	5.41648	7.10865	5.21784	3.03596	2.80999	3.62348	0	0				7.465	9.622	16.049	90	90	90	1152.77		BACMOH_clean
BADHIA_clean		0	0					0.0721853	0.0514559	0.0615498	0.079686	0.0479106	0.0536923	0.024784	0	0					1.11258	-1.1478	-0.749547	0.065412	0.0434604	0.0526596	0.0734377	0.0454453	0.0496215	0.0287406	0	0				8.852	20.701	34.194	90	90	90	6265.89		BADHIA_clean
BADHOG_clean		0	0					0.0713681	0.0547263	0.0653972	0.077247	0.0481953	0.0526737	0.0302813	0	0					0.836201	-0.843216	-0.460938	0.0637645	0.0423875	0.0562007	0.0713103	0.0456619	0.0491101	0.0318691	0	0				8.864	20.659	34.061	90	90	90	6237.3		BADHOG_clean
BADHUM01_clean		0	0					0.17443	0.100692	0.0669181	0.204982	0.0513972	0.0567935	0.0341291	0	0					0.496681	0.626386	0.611724	0.201529	0.139388	0.0788136	0.22906	0.052891	0.0572204	0.039037	0	0				8.887	32.456	10.6588	90	112.053	90	2849.46		BADHUM01_clean
BADHUM_clean		0	0					0.066953	0.0404379	0.06036	0.0761577	0.0484899	0.053764	0.0273938	0	0					0.728536	-0.452247	-0.108189	0.0636963	0.0393099	0.0580067	0.0721412	0.045355	0.0498451	0.0273948	0	0				8.882	20.586	33.922	90	90	90	6202.46		BADHUM_clean
BADJAU_clean	n= 1200	0	0					0.0856196	0.0767273	0.074164	0.0892201	0.0447534	0.0485724	0.0302813	0	0					1.32689	-10.8993	-11.4162	1.01858	1.0673	0.16738	1.04963	0.117892	0.115427	0.127234	NA	NA				8.882	61.248	33.689	90	90	90	18327		BADJAU_clean
BADJIC_clean	occupancy	0	0					0.342327	0.0550655	0.0504376	0.433938	0.306023	0.354762	0.0344797	0	0					1.74074	-2.59792	-0.0732025	0.519116	0.462452	0.0955175	0.553825	0.307544	0.355189	0.0420958	0	0				8.751	34.339	11.065	90	110.915	90	3105.96		BADJIC_clean
BADXAI_clean	occupancy	374.568	218.429					0.674453	0.56959	0.241518	0.700359	0.11394	0.10912	0.135412	410.969	239.658					-2.60656	-2.60591	6.65616	1.15009	1.17724	0.257147	1.1679	0.165467	0.139934	0.279202	0	0				31.129	31.1297	12.052	90	90	120	10114.2		BADXAI_clean
BADYAJ_clean		1847.99	1876.65					0.126582	0.144894	0.10096	0.12471	0.0726311	0.0719101	0.0757462	1838.43	1866.92					-0.25538	-0.0931727	2.41845	0.133121	0.16587	0.103925	0.129403	0.0737084	0.0714069	0.0836508	1851.63	1916.04				30.621	19.856	14.5916	90	102.387	90	8665.32		BADYAJ_clean
BAEDTA01_clean		266.126	124.214					0.342926	0.448112	0.420164	0.301428	0.150572	0.064405	0.291159	252.396	117.806					-16.1674	-6.43548	-6.43548	0.4614	0.512018	0.292112	0.458635	0.164675	0.190877	0.121924	0	0				8.981	19.713	19.713	90	90	90	3490.04		BAEDTA01_clean
BAFCAP_clean		0	0					0.573803	0.631352	0.498565	0.571478	0.0981329	0.0858914	0.290498	0	0					-1.40577	-4.12184	-2.49189	0.371787	0.431332	0.406371	0.367696	0.114293	0.106504	0.236692	0	0				12.043	15.9325	16.6416	76.7715	70.1712	85.4821	2924.08		BAFCAP_clean
BAFHAU_clean		2012.19	2343.71					0.294938		0.138044	0.334161	0.0318369	0.0682721	0.0136194	2006.69	2337.3					-0.688738	-0.688738	-15.1315	0.528242		0.427704	0.553376	0.116572	0.145805	0.101956	1480.37	1443.27				16.16	16.16	13.46	90	90	90	3515.02		BAFHAU_clean
BAFKUR_clean		0	0					0.244512	0.238965	0.000237985	0.249423	0.0638375	0.05353	0.161759	0	0					-15.7054	-3.4205	-3.28798	0.549884	0.595542	0.0332886	0.558062	0.142412	0.1328	0.233735	0	0				9.666	11.3579	13.6712	69.6993	70.7912	81.6673	1328.5		BAFKUR_clean
BAHGUN01_clean		0	0					0.40642	0.446756	0.274913	0.406876	0.0570997	0.0488331	0.100086	0	0					-1.44174	1.79103	0.697079	0.102178	0.0869569	0.14964	0.1021	0.0556203	0.0538508	0.0648222	0	0				4.958	10.9877	12.7817	91.5597	101.183	81.9326	676.328		BAHGUN01_clean
BAHGUN02_clean		0	0					0.423011	0.453476	0.260622	0.426098	0.060974	0.053432	0.100192	0	0					-0.826149	1.91697	0.93603	0.0953374	0.077141	0.13087	0.096166	0.0594452	0.0581286	0.0662914	0	0				4.941	10.9603	12.7554	91.5125	101.165	82.1656	671.368		BAHGUN02_clean
BAHGUN03_clean		0	0					0.417549	0.462565	0.28483	0.417448	0.0616209	0.0531045	0.105906	0	0					-1.3672	1.58998	0.725437	0.0986295	0.07481	0.145254	0.0997092	0.0585407	0.0567034	0.0680946	0	0				4.981	11.019	12.7781	91.6646	101.241	81.4302	680.2		BAHGUN03_clean
BAHGUN04_clean		0	0					0.384074	0.434496	0.279751	0.382032	0.0614235	0.0534264	0.103008	0	0					-1.31542	1.25317	0.3345	0.0863025	0.0658166	0.141252	0.0865855	0.0584875	0.056241	0.0701694	0	0				5.006	11.052	12.8246	91.6839	101.255	81.3406	687.96		BAHGUN04_clean
BAHGUN_clean		0	0					0.406466	0.4591	0.291976	0.404578	0.0612191	0.051906	0.109647	0	0					-1.21981	1.518	0.63143	0.0850633	0.0666658	0.148549	0.0847028	0.0598111	0.0573672	0.0725192	0	0				4.997	11.1005	12.7334	91.7318	101.313	81.1385	684.321		BAHGUN_clean
BAHMAZ_clean		369.071	254.767					0.995755	0.77988	0.631943	1.03485	0.052138	0.0552957	0.0324904	1005.13	693.824					0.333389	-23.388	-4.42808	0.826553	0.768745	1.10592	0.814415	0.184053	0.174371	0.244298	0	0				11.998	12.944	23.4907	95.489	90	90	3631.43		BAHMAZ_clean
BAKFAV_clean	metalvsorganic	0	0					0.806267	0.706802	0.725974	0.985575	0.141232	0.148137	0.132025	0	0					-10.5934	-24.1208	-10.062	1.84792	1.76175	1.91488	1.95208	0.650433	0.612842	0.700553	0	0				7.512	8.99243	15.1533	90.2555	93.3898	111.091	953.015		BAKFAV_clean
BAKGAX_clean		0	0					0.603866	0.647506	0.541817	0.602634	0.0620277	0.0345704	0.120603	0	0					1.23898	-3.44298	-6.98865	0.476297	0.333149	0.403223	0.512257	0.0872625	0.0763443	0.110554	0	0				7.325	13.224	22.767	90	90	90	2205.34		BAKGAX_clean
BAKGIF_manual		1337.91	1315.87					0.257172		0.000950869	0.264708	0.0777878	0.0742381	0.0996774	1262.18	1241.37					1.95365	2.51621	-2.64086	0.177688		0.0197265	0.182333	0.0741692	0.0672248	0.116993	1334.67	1330.51				7.542	12.539	13.6887	90	105.991	90	1244.44		BAKGIF_manual
BAKJEE_clean		1981.47	2156.17					0.428145	0.574768	0.53037	0.395349	0.0634355	0.0417482	0.150185	1928.08	2098.1					0.433186	-2.32795	-4.35026	0.254473	0.367647	0.214464	0.234821	0.0886127	0.0681159	0.1706	1880.14	1915.86				9.287	16.6673	28.242	90	90	97.0304	4338.69		BAKJEE_clean
BAKJII_clean		1605.55	1673.6					0.129351	0.185646	0.288671	0.111042	0.0612373	0.0424223	0.150181	1510.81	1574.88					-2.90127	-1.4957	-1.56483	0.191818	0.196219	0.264832	0.187503	0.0758502	0.0635292	0.134095	1328.27	1300.53				11.85	13.853	13.9441	90	114.791	90	2078.09		BAKJII_clean
BAKJOO_clean		1516.99	1509.6					0.905369	1.06377	1.00747	0.870337	0.0641645	0.0541785	0.109982	1503.39	1496.08					-3.10921	1.87682	-3.9616	0.440659	0.462193	0.418113	0.43763	0.0801474	0.07094	0.122393	1420.54	1330.81				10.164	13.3634	22.3947	86.8319	80.3448	83.2228	2975.78		BAKJOO_clean
BAKLIK_clean		0	0					0.357259	0.134882	0.000274609	0.367808	0.0751227	0.0686514	0.161406	0	0					-7.3937	-5.26882	-3.72518	0.437771	0.12281	0.0187021	0.451574	0.131979	0.132384	0.126584	0	0				11.994	16.3513	16.3504	65.7751	75.8465	104.153	2610.96		BAKLIK_clean
BAKYIY_clean	occupancy	1362.66	1312.21					0.523574	0.117379	0.0146064	0.657256	0.219338	0.26331	0.0535986	1017.27	979.609					2.24632	-0.0355324	3.4399	0.437069	0.080273	0.0405264	0.551833	0.201727	0.241376	0.0522798	1119.64	1139.92				15.265	16.886	12.48	90	90	90	3216.9		BAKYIY_clean
BAKYOE_clean		1334.85	1294.74					0.398092	0.235864	0.076637	0.464715	0.0578636	0.0579767	0.0574895	1362.79	1321.84					-1.08225	-2.27768	-1.82496	0.432978	0.349953	0.0521334	0.4798	0.0611009	0.0662035	0.0442229	1291.63	1188.94				12.474	15.248	16.899	90	90	90	3214.25		BAKYOE_clean
BALMUW01_clean		0	0					0.488125	0.621363	0.360764	0.285331	0.204921	0.0207211	0.268438	0	0																				6.146	8.69191	9.21629	115.498	95.092	84.5072	441.725		BALMUW01_clean
BALMUW_clean		0	0					0.496041	0.631343	0.378728	0.284094	0.218806	0.0240034	0.29373	0	0																				6.188	8.73367	9.31226	64.5528	84.6393	84.138	451.38		BALMUW_clean
BALPAH_clean	n= 1952	0	0												NA	NA		manually	9		-4.77005	-4.30758	2.20423	0.798387	0.787148	0.760317	0.80208	0.0606798	0.0471571	0.0973219	NA	NA												BALPAH_clean
BALPEL_clean	occupancy	0	0												NA	NA															NA	NA												BALPEL_clean
BALPIP_clean	n= 1932	0	0												NA	NA															NA	NA												BALPIP_clean
BAMKIM_clean		1250.1	1128.61					0.485641	0.51767	0.146292	0.496223	0.0918902	0.0628409	0.210239	1151.46	1039.52					0.882115	-1.03863	1.31176	0.515095	0.506803	0.121585	0.532003	0.0906852	0.0634415	0.201678	1185.99	1085.6				9.655	17.196	20.8799	90	94.2324	90	3457.18		BAMKIM_clean
BAMKOS_clean		1275.22	1145.39					0.462228	0.517617	0.146804	0.469451	0.0902249	0.0629416	0.201379	1158.44	1040.49					0.867713	-0.208479	0.874383	0.46525	0.498863	0.116769	0.476043	0.0886212	0.0639947	0.188951	1185.47	1084.71				9.669	17.46	20.4484	90	94.8898	90	3439.55		BAMKOS_clean
BANMAG_clean		985.542	717.274					0.153773	0.14342	0.00197777	0.176056	0.0723964	0.0663615	0.082742	938.318	682.909					-0.169052	-0.210155	-7.84827	0.147315	0.113542	0.000515395	0.183715	0.0847107	0.0893359	0.0767818	874.573	584.452				15.084	15.0839	15.428	90	90	120	3039.98		BANMAG_clean
BAPDAA_clean		1497.44	1083.99					0.194753	0.227513	0.492178	0.115611	0.104833	0.0303412	0.204155	1505.03	1089.57					-1.55794	-1.55757	-9.12813	0.354523	0.379222	0.358262	0.338956	0.110603	0.0852125	0.144458	1465.17	934.013				26.888	26.8883	7.239	90	90	120	4532.43		BAPDAA_clean
BAQWEY_clean		0	0					1.18348		1.46481	1.14831	0.200656	0.0682929	0.588615	0	0					-5.7205	-4.5723	-10.7781	0.640629		1.16459	0.575134	0.222181	0.125229	0.506351	0	0				14.345	14.6995	20.0325	108.675	90.123	107.785	3787.03		BAQWEY_clean
BAQWIC_clean		1278.34	780.19					0.702442		1.06635	0.660744	0.108126	0.0559907	0.298048	1252.14	764.246					-3.56916	-3.88735	-0.915879	0.403259		0.868681	0.349929	0.144327	0.10488	0.288026	1072.08	579.528				10.863	14.4806	15.3074	113.141	90.4567	107.818	2085.22		BAQWIC_clean
BAQWOI_clean		0	0					0.617115		1.33265	0.555918	0.20001	0.0630585	0.698015	0	0					-5.24046	-3.01283	-1.73313	0.682881		1.34151	0.626551	0.215183	0.0799217	0.707042	0	0				24.973	19.351	21.3829	90	96.0455	90	10275.9		BAQWOI_clean
BARJEM_clean		1494.11	897.466					1.03979		1.23762	0.992688	0.160709	0.0807901	0.309747	1703.47	1023.2					-11.3232	-14.8371	-6.70426	1.07351		1.09451	1.06852	0.306316	0.224812	0.458308	988.033	414.308				16.951	23.303	27.8449	90	125.993	90	8899.16		BARJEM_clean
BARZAW_clean		0	0					0.0701627	0.0558603	0.0399809	0.0731762	0.0446826	0.0472551	0.02878	0	0					0.184911	0.0319067	0.0383962	0.0665051	0.0457053	0.0467824	0.0700542	0.0442642	0.0469136	0.0278863	0	0				18.279	18.4916	18.4915	70.2983	70.7614	109.238	4825.31		BARZAW_clean
BARZIE_clean		0	0					0.141085	0.160235	0.270528	0.133981	0.0624725	0.0476528	0.154085	0	0					-0.922755	-1.01319	-1.01589	0.100837	0.123737	0.266733	0.0919583	0.0684564	0.0571022	0.138646	0	0				18.336	18.5357	18.535	70.3123	70.7461	109.253	4862.35		BARZIE_clean
BARZOK_clean		0	0					0.176504	0.149217	0.0837393	0.183466	0.0584515	0.0530642	0.0917551	0	0					1.09739	0.510355	0.508739	0.118297	0.0973048	0.0681923	0.12292	0.0533215	0.0493574	0.0778269	0	0				18.38	18.5557	18.5556	70.3371	70.7193	109.281	4882.93		BARZOK_clean
BARZOL_charged		0	0					0.221944		0.207927	0.222445	0.0643718	0.0647197	0.061937	0	0					-1.44544	-3.03289	-1.15206	0.310135		0.223034	0.313245	0.0757267	0.0771856	0.0655143	0	0				18.797	18.883	31.9343	90	90.6908	90	11334.1		BARZOL_charged
BARZUR_clean		1177.75	1272.16																		-0.110457	6.88156	7.19372	0.518326		1.16902	0.505813	0.117652	0.0731864	0.740177	1449.19	1792.17												BARZUR_clean
BASJUB_clean		1218.16	1182.43					0.276525		0.0785196	0.279481	0.0701415	0.0589875	0.196553	1164.94	1130.8					-0.375733	-0.376498	-0.67724	0.0959418		0.0318747	0.096898	0.0630553	0.0615304	0.0803378	1135.99	1086.98				13.068	13.068	25.914	90	90	90	4425.4		BASJUB_clean
BASSOF_clean		0	0					0.154695	0.110524	0.239452	0.159201	0.0378525	0.040128	0.0308509	0	0					-1.06192	-1.35079	-2.36477	0.181502	0.100249	0.230377	0.196696	0.048525	0.0550593	0.0284195	0	0				8.452	25.326	17.748	90	90	90	3799.05		BASSOF_clean
BASSUL_clean		0	0					0.132196	0.0826864	0.223296	0.137498	0.0368138	0.0407157	0.0248081	0	0					-1.23633	-1.59383	-2.79764	0.204805	0.096862	0.229478	0.227587	0.0543999	0.0595448	0.0385692	0	0				8.476	25.285	17.765	90	90	90	3807.32		BASSUL_clean
BASTAS_clean		0	0					0.144621	0.109106	0.273889	0.144301	0.0417184	0.0403082	0.0460574	0	0					-2.59936	-1.64907	-3.05492	0.261743	0.165117	0.290761	0.281689	0.064247	0.0664629	0.0574286	0	0				8.553	25.287	17.827	90	90	90	3855.62		BASTAS_clean
BASTEW_clean		0	0					0.172075	0.149056	0.333464	0.16686	0.0507751	0.0367789	0.0907643	0	0					-1.63527	-1.85309	-2.96936	0.178705	0.0949657	0.251339	0.192927	0.0540222	0.0593884	0.0386901	0	0				8.595	25.363	17.822	90	90	90	3885.11		BASTEW_clean
BASTIA_clean		0	0					0.15816	0.122891	0.26584	0.159177	0.0415935	0.0392075	0.0484108	0	0					-1.6953	-1.41087	-2.52504	0.18688	0.10567	0.246284	0.201385	0.0533669	0.0569711	0.0430691	0	0				8.511	25.339	17.774	90	90	90	3833.14		BASTIA_clean
BASTUM_clean		0	0					0.142156	0.0971345	0.231067	0.146587	0.0358383	0.0385389	0.0275284	0	0					-1.3906	-1.68467	-2.71538	0.176713	0.0892402	0.228695	0.193112	0.0508168	0.0585276	0.0270912	0	0				8.488	25.37	17.806	90	90	90	3834.35		BASTUM_clean
BAWROI_clean		1916.72	3042.99					0.24429	0.361861	0.294816	0.224947	0.0776639	0.0555947	0.151963	1917.76	3044.63					1.21087	1.21087	-1.15378	0.276585	0.389275	0.325976	0.257989	0.0817624	0.0548676	0.172308	1914.67	3077.86				28.368	28.368	33.958	90	90	90	27327.5		BAWROI_clean
BAWRUO_clean	Z>86	1252.56	460.638												NA	NA															NA	NA												BAWRUO_clean
BAXFIR01_clean		0	0					0.10411		0.000213974	0.106275	0.044271	0.0480577	0.0120835	0	0					-1.52242	-1.29846	-1.97279	0.103209		0.00085256	0.105342	0.0516401	0.0536512	0.0345456	0	0				8.027	19.431	8.96075	90	93.2884	90	1395.33		BAXFIR01_clean
BAXFIR02_clean		0	0					0.122925		0.000266586	0.125481	0.0618509	0.058648	0.0890756	0	0					-1.34984	-0.883141	-1.6367	0.125375		0.000845722	0.127969	0.0725469	0.0687249	0.105034	0	0				8.031	19.408	8.88575	90	92.8189	90	1383.31		BAXFIR02_clean
BAXFUD_clean		0	0					0.213223		0.000428248	0.217656	0.0671242	0.0663358	0.0738258	0	0					-2.88301	-1.57549	-3.24115	0.175737		0.0337496	0.178695	0.0943771	0.0888055	0.141736	0	0				8.145	20.26	8.851	90	90.0583	90	1460.57		BAXFUD_clean
BAXGAK_clean		0	0					0.105435		0.000178924	0.107628	0.0481751	0.0526366	0.0102519	0	0					-2.11279	-0.252068	-2.72856	0.126199		0.000194612	0.128824	0.0564366	0.0608825	0.0186467	0	0				8.011	19.439	8.96462	90	93.383	90	1393.59		BAXGAK_clean
BAXLOD_clean		0	0					0.320159	0.244889	0.228872	0.352856	0.0678045	0.0424994	0.148781	0	0					-0.336624	-0.336624	-4.73457	0.217613	0.235853	0.21525	0.211729	0.0728194	0.0534291	0.134869	0	0				12.299	12.299	5.244	90	90	90	793.236		BAXLOD_clean
BAXREY_clean	occupancy	0	0												NA	NA															NA	NA												BAXREY_clean
BAXSIE_clean		713.52	475.892					0.121435	0.115502	0.117732	0.125554	0.0392648	0.0276174	0.0504808	707.027	471.56					-1.7468	-1.85349	-1.87057	0.143935	0.123543	0.12664	0.159107	0.0406133	0.0445285	0.0368431	612.262	386.421				8.359	15.225	15.225	90	90	90	1937.62		BAXSIE_clean
BAYCOU_clean	occupancy	0	0			collapse		1.84385	1.61635	1.45401	1.87121	1.43981	1.53462	0.374966	0	0					-4.72294	10.2312	-3.32219	1.68822	1.7524	0.946955	1.7141	1.60089	1.69987	0.489261	0	0				20.483	21.89	6.493	90	90	90	2911.29		BAYCOU_clean
BAYCUA_clean		1760.75	1562.51					0.315378		1.48178	0.23585	0.144827	0.0733561	0.716594	1491.67	1323.72					-15.4827	-16.2086	-1.51556	1.37376		1.82805	1.34278	0.261725	0.233279	0.489297	0	0				32.099	12.916	21.4312	90	126.741	90	7120.12		BAYCUA_clean
BAZDAJ_clean		0	0					0.159649	0.240271	0.204381	0.136262	0.0601936	0.050402	0.0882914	0	0					-2.13402	-2.98107	-2.91695	0.141888	0.151248	0.1281	0.140227	0.0721668	0.0718673	0.0730263	0	0				13.308	15.622	16.473	90	90	90	3424.7		BAZDAJ_clean
BAZFUF01_clean		1852.62	5416.03					0.0838249	0.0735438	0.0400303	0.0868577	0.0597386	0.0583222	0.0704403	1884.58	5509.46					0.738201	0.736742	0.738566	0.0815716	0.0815727	0.0615535	0.0822863	0.0582486	0.0552504	0.0809018	1864.58	5572.53				27.418	27.418	27.418	90	90	90	20611.4		BAZFUF01_clean
BAZFUF_clean		1862.82	5478.02					0.0792418	0.0588651	0.0388732	0.0835945	0.0561472	0.0559375	0.0577311	1898.23	5582.22					0.663587	0.663587	0.663587	0.0760218	0.0659788	0.0578288	0.0781062	0.0560489	0.0547303	0.0660115	1877.85	5632.89				27.472	27.472	27.472	90	90	90	20733.4		BAZFUF_clean
BAZGAM_clean		832.008	6575.8					0.122992	0.100015	0.036692	0.126705	0.0761226	0.0747514	0.0931869	837.969	6622.81					0.532883	0.540129	0.55607	0.126709	0.105172	0.0508232	0.130085	0.0772735	0.0755448	0.0987863	831.371	6682.25				48.303	48.3036	48.3031	59.9995	59.9994	59.9997	79691		BAZGAM_clean
BAZGEQ_clean	n= 1224	1548.26	4623.13					0.121864	0.0877105	0.0812521	0.125717	0.0674611	0.0676002	0.0657919	1545.19	4613.96					0.496844	0.409751	0.409751	0.116825	0.0915298	0.0804745	0.119815	0.0669932	0.0664984	0.0729317	1543.3	4669.23				38.342	39.707	39.707	90	90	90	60451.8		BAZGEQ_clean
BAZJET_clean		2027.46	3263.29					0.874691	0.00020792	0.313803	0.907475	0.0798522	0.0375313	0.325314	1785.83	2874.29					-5.66237	-2.48413	-1.74202	0.943299	0.0381908	0.323828	0.978728	0.10394	0.0660712	0.323578	1737.45	2515.16				13.814	20.792	20.7916	120.001	90	90	5171.66		BAZJET_clean
BAZJIX_clean		1842.67	2391.66					0.695446	0.327162	0.41653	0.715938	0.0838226	0.0388117	0.321153	2071.86	2689					-4.14927	-2.32157	-4.8767	0.267269	0.367391	0.26166	0.265613	0.108377	0.072455	0.297782	1716.62	1988.64				15.904	20.042	21.5039	80.1137	68.2971	66.6239	5843.22		BAZJIX_clean
BEDYEQ_clean		1331.01	2878.21					0.16571	0.218615	0.157771	0.157877	0.0631424	0.0474671	0.109663	1362.55	2946.38					0.802077	-1.2357	-1.20091	0.150344	0.183409	0.143737	0.145534	0.0651812	0.0536792	0.0993161	1354.57	2880.49				17.143	41.968	41.9677	120	90	90	26148.7		BEDYEQ_clean
BEFGEA_manual		2226.98	3412.52					0.469541	0.73953	0.499019	0.430444	0.0604118	0.0143145	0.32163	2221.05	3403.47					0.533089	0.0298342	-0.020393	0.474325	0.749567	0.48271	0.434855	0.0625356	0.0156439	0.328255	2212.74	3410.5				17.483	26.48	26.4797	120	90	90	10616.4		BEFGEA_manual
BEFKUU_clean		0	0					0.142507	0.153154	0.126234	0.116192	0.0647762	0.0434726	0.0860799	0	0					-0.245195	-0.258176	0.965728	0.14755	0.160749	0.10995	0.132355	0.0645075	0.0419443	0.0870707	0	0				13.867	13.8666	15.056	90	90	119.999	2507.25		BEFKUU_clean
BEFLAB01_clean		0	0					0.258097	0.293503	0.201003	0.173566	0.0765242	0.0379183	0.11513	0	0					-16.546	-9.03791	-19.7612	1.0966	1.20717	0.806876	0.944024	0.259381	0.318184	0.200577	0	0				20.147	20.515	10.024	90	90	90	4143.08		BEFLAB01_clean
BEFLEF_clean	metalvsorganic	0	0					0.133406	0.148616	0.10393	0.102043	0.0661644	0.0456126	0.0867162	0	0					-16.4932	-20.9859	-13.987	1.48275	1.56015	1.3417	1.31421	0.32036	0.367345	0.273376	0	0				13.826	14.479	10.166	90	90	90	2035.1		BEFLEF_clean
BEFLIJ_clean		0	0					0.113719	0.12128	0.113742	0.0834557	0.057117	0.0427873	0.0714466	0	0					-0.656537	-0.763521	-0.583522	0.10189	0.109511	0.105222	0.068074	0.0596618	0.0495633	0.0697603	0	0				10.22	14.145	14.601	90	90	90	2110.75		BEFLIJ_clean
BEFLUV_clean		313.818	200.174					0.237666	0.267304	0.181981	0.174799	0.0914796	0.0477246	0.135235	0	0					-0.834157	-0.837568	-0.387952	0.221392	0.250009	0.170415	0.157901	0.0938992	0.0548649	0.132934	0	0				14.662	14.662	9.615	90	90	90	2066.98		BEFLUV_clean
BEFMAC_clean		0	0					0.220566	0.248504	0.195813	0.13357	0.0737448	0.0385746	0.108915	0	0					-3.03278	-1.39676	0.464203	0.221979	0.253915	0.232221	0.0839939	0.077417	0.054212	0.100622	0	0				10.223	14.605	14.3041	90	90.1602	90	2135.69		BEFMAC_clean
BEFMOQ_clean		0	0					0.710551	0.749553	0.643064	0.622031	0.0927416	0.0394746	0.146009	0	0					0.184713	2.53756	0.228991	0.552108	0.596865	0.476769	0.448415	0.100516	0.0294385	0.171594	0	0				14.13	13.178	14.0177	90	90.56	90	2610.04		BEFMOQ_clean
BEFMUW_clean		0	0					0.827025	0.879139	0.744122	0.701472	0.0903027	0.0318617	0.148744	0	0					1.43053	1.65997	1.17883	0.676614	0.727654	0.594341	0.554726	0.0950392	0.0241713	0.165907	0	0				13.82	13.187	13.8524	90	90.8024	90	2524.27		BEFMUW_clean
BEFNAD_clean		0	0					0.975212	1.03135	0.887787	0.838091	0.0854282	0.0265966	0.14426	0	0					1.54768	1.28236	2.61234	0.683091	0.728127	0.604007	0.58203	0.100416	0.0375915	0.163241	0	0				13.808	13.249	13.8417	90	91.3289	90	2531.55		BEFNAD_clean
BEFNEH_clean	occupancy	0	0					0.779015	0.767749	1.0011	0.557579	0.249375	0.0346064	0.42119	0	0					-12.2938	-24.9462	-18.636	2.21466	2.19649	2.31119	2.17151	0.755379	0.547958	0.921316	NA	NA				12.923	14.226	14.1979	90	92.7937	90	2607.08		BEFNEH_clean
BEFNIL_clean		0	0					0.323721	0.318091	0.4023	0.267659	0.101134	0.0222487	0.180019	0	0					-0.123047	-0.123047	0.544844	0.326297	0.321363	0.39814	0.274188	0.100454	0.0196835	0.181224	0	0				10.24	10.24	9.652	90	90	90	1012.09		BEFNIL_clean
BEFNOR_clean		0	0					0.286434	0.329829	0.210709	0.177727	0.125843	0.117128	0.13507	0	0					2.09158	0.48484	-2.50136	0.283877	0.334772	0.160496	0.190953	0.129025	0.12279	0.135627	0	0				8.91	14.974	14.712	90	90	90	1962.85		BEFNOR_clean
BEFNUX_clean		0	0					0.743348	0.785129	0.619718	0.689414	0.169549	0.147612	0.194066	0	0					6.16909	1.02572	3.07727	0.734919	0.779216	0.649933	0.631645	0.176328	0.124475	0.234281	0	0				8.909	14.975	14.789	90	90	90	1973.03		BEFNUX_clean
BEFPAF_clean		0	0					0.158432	0.16877	0.176483	0.0990283	0.0537522	0.0402035	0.0673009	0	0					0.398965	1.14859	1.13663	0.149586	0.15861	0.164992	0.0980854	0.05821	0.0304058	0.0860143	0	0				13.911	12.772	18.6344	90	90.3597	90	3310.73		BEFPAF_clean
BEGBOG_clean		0	0					1.60023	1.08607	0.388209	1.88669	0.0784152	0.0943919	0.030485	0	0					-15.309	-15.309	-15.309	1.22647	1.31166	0.448249	1.24427	0.33021	0.279787	0.481481	0	0				11.085	11.085	11.085	90	90	90	1362.09		BEGBOG_clean
BEGDEY_clean	occupancy	1495.13	1275.82					1.07476	0.424661	0.724158	1.1492	0.56918	0.603813	0.245257	0	0					8.23458	8.23404	-5.50045	0.915207	0.414917	0.51602	0.97711	0.45002	0.476783	0.199711	0	0				18.699	18.699	35.768	90	90	90	12506.4		BEGDEY_clean
BEJZAS_clean	metalvsorganic	0	0					0.665516	0.674935	0.264986	0.705833	0.046586	0.0472688	0.0447083	0	0					-27.8245	-24.0507	-14.0954	3.22194	2.03551	2.2328	3.85915	0.466056	0.420501	0.591333	0	0				10.42	10.452	11.622	90	90	90	1265.75		BEJZAS_clean
BEKSAM_clean		0	0			collapse		5.76892	5.68204	6.03595	5.82612	4.46445	5.09369	4.00681	0	0																				10.176	11.941	14.3756	90	91.1001	90	1746.48		BEKSAM_clean
BEKYOG01_clean		690.705	499.036					1.28251	0.622668	0.514313	1.67645	0.448892	0.638974	0.132088	595.029	429.903					-3.70489	-11.4527	-3.60757	1.40382	0.562776	0.423193	1.90606	0.516627	0.685028	0.235958	277.332	169.287				18.4	14.566	12.313	90	113.192	90	3033.38		BEKYOG01_clean
BEKYOG_clean		688.959	329.822					0.714183	0.702345	0.686465	0.749409	0.210942	0.223287	0.200655	734.518	351.622					-1.36917	-1.5941	-5.87915	0.68854	0.666002	0.698162	0.729609	0.22875	0.236527	0.222269	543.353	232.352				11.737	11.7369	12.3129	72.0912	72.0925	76.911	1519.41		BEKYOG_clean
BEKYUM_clean	occupancy	0	0				NUMBER OF ATOM								0	0				NUMBER OF ATOM											0	0				11.728	11.7282	12.2984	71.7811	71.7815	77.4272	1512.73		BEKYUM_clean
BEKZEX01_clean		0	0				NUMBER OF ATOM								0	0				NUMBER OF ATOM											0	0				11.726	11.7258	12.379	72.2108	72.2107	77.124	1527.38		BEKZEX01_clean
BEKZEX_clean	occupancy	0	0				NUMBER OF ATOM								0	0				NUMBER OF ATOM											0	0				11.728	11.728	12.3834	72.214	72.2173	77.1665	1528.72		BEKZEX_clean
BELJIL_clean		731.084	567.816					0.926028	0.719474	0.480875	0.960377	0.0628394	0.0600402	0.0824339	684.898	531.931					-11.6569	5.45052	4.54728	0.519113	0.534459	0.0717068	0.532061	0.0777841	0.0759172	0.0908529	665.896	516.108				13.326	15.4551	15.4555	67.907	73.2973	106.703	2528.93		BELJIL_clean
BELTOD_clean		1165.6	1126.97																																									BELTOD_clean
BELTUJ_clean		1050.53	967.648					0.294225	0.319221	0.299364	0.289292	0.0654307	0.0466389	0.160495	1091.02	1004.95					-3.04924	-1.78653	-2.13719	0.158211	0.159515	0.134645	0.15899	0.0770488	0.0657956	0.133977	877.764	753.401				19.536	24.875	24.963	90	90	90	12131		BELTUJ_clean
BELVEV_charged		1675.01	1890.83																		-1.11699	-3.29274	-1.07055	0.36066	0.370833	0.272294	0.361772	0.100536	0.0802743	0.205701	1594.65	1699.21												BELVEV_charged
BELYIC_clean		0	0					2.02885	1.20854	1.76133	2.38372	0.0885384	0.0593348	0.176149	0	0					1.52307	1.51935	-2.98509	0.350982	0.390568	0.386973	0.331548	0.11974	0.11464	0.135038	0	0				8.588	8.58749	20.8642	100.898	100.896	94.6689	1472.74		BELYIC_clean
BENXUP_clean	occupancy	0	0					0.336092	0.214897	0.0947858	0.369072	0.0606744	0.0636739	0.0481767	0	0					0.188118	-0.756762	-0.0671785	0.140957	0.196324	0.0787156	0.137651	0.0604146	0.0645222	0.0432997	0	0				9.005	11.1658	16.6724	108.447	90	113.778	1439.45		BENXUP_clean
BENZOL_clean		0	0					1.08293	1.61882	1.60809	1.04977	0.112388	0.0501545	0.377919	1150.67	1000.21					-3.06727	-19.1013	-3.25163	3.5947	3.48242	3.68044	3.59553	0.209978	0.0946293	0.702134	0	0				9.781	11.0067	11.3821	80.4627	82.4222	81.9781	1189.15		BENZOL_clean
BENZUR_clean		0	0					1.15717	1.69495	1.74284	1.12206	0.121654	0.0486571	0.433109	1195.18	958.505					-5.03222	-16.943	-4.45546	3.65953	3.66569	3.78497	3.65541	0.345015	0.145723	1.19533	0	0				9.809	11.0577	11.6985	81.2285	81.57	81.2507	1229.51		BENZUR_clean
BEPBAB_clean		853.346	819.307					0.609702	0.803701	1.28848	0.582428	0.101377	0.046178	0.373127	1099.01	1055.18					-19.8929	86.989	-1.66815	2.80611	2.35979	2.51733	2.82908	0.44723	0.306795	1.1386	0	0				9.493	11.2419	11.2703	82.8902	83.801	77.6785	1161.88		BEPBAB_clean
BEPLUF_clean		1247.7	1414.19					0.738301	1.16462	1.12586	0.681929	0.14019	0.0719406	0.549686	1181.68	1339.36					2.4646	-5.59765	-5.68472	0.648147	1.37932	1.12256	0.560113	0.169924	0.094643	0.621613	1104.27	1142.3				10.196	17.686	17.6864	119.999	90	90	2762.07		BEPLUF_clean
BEPMAM_clean		1219.59	1364.22					0.901324	1.38928	1.06662	0.849451	0.144382	0.0707053	0.586444	1101.92	1232.6					1.59169	-4.38915	-4.48238	0.71155	1.35993	1.18886	0.630911	0.167406	0.0949604	0.602077	1076.94	1111.11				10.172	17.591	17.591	120.002	90	90	2725.9		BEPMAM_clean
BEPMIU_clean		1049.73	1027.65					0.21719	0.128169	0.316797	0.2206	0.0733936	0.0669235	0.10445	1040.77	1018.88					1.58204	-0.842057	-0.903101	0.21426	0.145183	0.334471	0.21504	0.0753844	0.068142	0.110148	1040.28	1016.69				10.265	17.529	17.5283	119.999	90	90	2731.44		BEPMIU_clean
BEPNER_clean		0	0					0.537801	0.599837	0.694533	0.533121	0.106863	0.10849	0.0816413	0	0					-3.91329	-24.9557	3.6598	1.37119	1.71374	0.706875	1.37084	0.265071	0.265844	0.253092	0	0				25.117	5.78	21.993	90	120.744	90	2744.14		BEPNER_clean
BEPNIV_clean		1250.61	1399.85					0.528986	0.755168	0.893333	0.490095	0.0913921	0.0711537	0.207763	1180.58	1321.52					-1.70851	-2.08412	-1.95101	0.602971	0.914514	0.941912	0.55716	0.106415	0.0831281	0.240314	1171.1	1237.13				10.149	17.581	17.5802	120	90	90	2716.57		BEPNIV_clean
BEPNOB_clean		1235.88	1388.16					0.529311	0.782185	0.895393	0.487795	0.0917006	0.0715321	0.20767	1159.09	1301.91					0.334264	0.14098	0.141549	0.463465	0.714731	0.802602	0.423386	0.0889162	0.0706762	0.193796	1158.78	1309.58				10.172	17.591	17.591	120.002	90	90	2725.9		BEPNOB_clean
BEPNUH_clean		1066.13	914.589					0.144913	0.139662	0.346097	0.136623	0.0757081	0.0678401	0.113475	1041.87	893.827					2.95725	-0.0405771	0.0298693	0.162371	0.190917	0.369118	0.1509	0.0718327	0.0621379	0.118368	1054.46	930.759				10.172	17.744	17.7442	120	90	90	2773.61		BEPNUH_clean
BEPPAP_clean		1075.64	1042.56					0.216883	0.128404	0.314397	0.220337	0.0727216	0.0663894	0.103116	1052.88	1020.57					1.57543	-0.569344	-0.616312	0.209311	0.134063	0.321833	0.210962	0.0726185	0.0651502	0.108466	1058.96	1030.57				10.245	17.459	17.4588	119.998	90	90	2704.49		BEPPAP_clean
BEPPIX_clean		1097.19	1107.78					0.408486	0.803109	0.71245	0.369443	0.126282	0.0738285	0.519684	978.566	987.989					3.03791	-1.32346	-1.76977	0.582719	1.2036	0.99871	0.523514	0.133074	0.076665	0.556137	1018.92	1023.76				10.395	17.454	17.4543	119.999	90	90	2742.56		BEPPIX_clean
BEPPOD_clean		1123.79	1169.72					0.466059	0.756002	0.778065	0.433026	0.0862531	0.0743156	0.1728	1095.7	1140.5					-0.421529	-0.840777	-0.951301	0.479679	0.786283	0.767271	0.446317	0.0896594	0.0780784	0.173622	1086.09	1103.93				10.343	17.734	17.7339	120	90	90	2817.01		BEPPOD_clean
BEPREV01_clean		2145.52	2654.63					0.370275	0.445048	0.38853	0.361858	0.0650814	0.0477177	0.203026	1952.41	2415.74					0.860005	0.882646	-3.64803	0.328388	0.410924	0.359361	0.318831	0.062749	0.0461551	0.194578	1817.06	2206.17				29.151	29.1512	23.07	90	90	119.999	16978.2		BEPREV01_clean
BEPREV02_clean		2300.05	3001.56					0.34108	0.401743	0.368505	0.333942	0.0699625	0.0539654	0.19705	2192.96	2861.81					1.90189	1.87573	-4.37801	0.301823	0.384863	0.350478	0.291778	0.0727948	0.0586889	0.184859	2098.53	2659.36				29.05	29.05	24.502	90	90	120	17907.1		BEPREV02_clean
BEPREV03_clean		2252.29	2819.92					0.345768	0.439623	0.372089	0.33512	0.0657222	0.0480861	0.205832	2034.71	2547.55					0.982615	1.89377	-3.73617	0.321987	0.428166	0.359347	0.309754	0.0654402	0.0485796	0.199388	1897.46	2330.21				29.106	29.1064	23.417	90	90	120	17180.4		BEPREV03_clean
BEPREV_clean		2239.58	2804.01					0.342617	0.437138	0.371374	0.331838	0.0652193	0.0476766	0.204586	2033.22	2545.68					0.923864	1.87247	-2.90942	0.299525	0.413495	0.345071	0.286261	0.0647356	0.048404	0.194481	1945.13	2406.25				29.106	29.1064	23.417	90	90	120	17180.4		BEPREV_clean
BEPRIZ_clean		1926.88	2520.87					0.202292	0.244194	0.149264	0.198145	0.0702018	0.0556347	0.160032	1923.61	2516.48					-1.84286	-1.8455	-1.83862	0.238458	0.23193	0.129424	0.242887	0.080154	0.069777	0.144145	1878.14	2345.56				18.9	18.8996	18.8995	61.8669	61.8688	61.8688	4973.3		BEPRIZ_clean
BEPROF_clean		2199.56	3012.93					0.137554	0.180643	0.0934972	0.133988	0.0515867	0.0492404	0.0699661	2159	2957.57					0.19183	0.19183	0.192364	0.104049	0.24341	0.0818897	0.0895055	0.053246	0.0477474	0.0963186	2167.23	2986.94				18.715	18.7149	18.7148	99.4078	99.4105	99.4105	6256.61		BEPROF_clean
BEPVAV_clean		0	0					0.634314		0.191085	0.66145	0.0642094	0.0590762	0.0901455	0	0					0.657872	1.48415	0.949865	0.0944436		0.156959	0.0906161	0.0577425	0.0566889	0.0630659	0	0				11.37	11.4275	12.1916	67.9508	87.7436	69.8049	1370.51		BEPVAV_clean
BEPVEZ_clean		748.08	589.251					0.473753		0.285592	0.485273	0.0725913	0.0649753	0.111072	715.195	563.404					-0.613063	1.20835	1.42397	0.199315		0.283939	0.194134	0.0750142	0.0711494	0.0945415	692.503	548.207				11.451	11.603	13.2028	65.3611	71.3686	71.462	1475.76		BEPVEZ_clean
BEPVID_clean		607.375	465.195					0.503771		0.260735	0.518651	0.0714441	0.0652079	0.102953	587.953	450.311					1.02558	-0.98934	-2.31938	0.389722		0.220512	0.400081	0.0795501	0.0764341	0.0952942	0	0				11.457	11.4718	13.1202	90.1773	115.706	110.146	1434.8		BEPVID_clean
BEPVOJ01_clean		595.378	448.089					0.497548		0.242443	0.513167	0.0700159	0.0646315	0.0972211	579.381	436.051					1.85611	-0.720225	-2.5419	0.239338		0.215618	0.240791	0.0781371	0.0766329	0.0857372	0	0				11.357	11.4969	12.9352	88.8681	64.6115	69.3045	1409.92		BEPVOJ01_clean
BEPVOJ_clean		543.854	402.64					0.441936		0.186749	0.45756	0.0624316	0.0560992	0.0944267	460.251	340.763					2.51414	-1.1576	-2.04958	0.314432		0.188289	0.322155	0.0696774	0.0661606	0.0874467	0	0				11.312	11.5156	12.6954	88.5042	65.8303	68.3473	1387.01		BEPVOJ_clean
BEPWEA_clean		0	0					1.57421	1.38014	1.49818	1.75433	0.201384	0.0456	0.362036	1278.28	927.974					-22.2239	-25.1998	-28.0177	1.56004	1.49025	1.65656	1.57837	0.752683	0.460331	1.05417	0	0				12.743	13.9646	14.797	84.9834	83.4496	64.4405	2357.8		BEPWEA_clean
BERFIP_clean		0	0					0.307655	0.698637	0.175054	0.216653	0.0986231	0.0414191	0.234483	0	0					-3.2447	-2.45472	0.119229	0.14238	0.210425	0.056665	0.132806	0.049314	0.0511195	0.045026	0	0				7.977	9.28188	15.8521	85.3863	79.2125	64.5475	1041.07		BERFIP_clean
BERGAI_clean		0	0					0.0720048	0.0182328	0.0242195	0.0783521	0.0699509	0.0761752	0.0434973	0	0					-0.728346	-0.728346	-0.487699	0.0977358	0.0543646	0.058111	0.102923	0.0720573	0.0780357	0.0466494	0	0				12.7	12.7	25.364	90	90	90	4090.96		BERGAI_clean
BERQIA_clean	occupancy	1247.4	1087.23												NA	NA					-9.40561	-11.1837	6.98108	0.873271	0.895571	0.430127	0.881495	0.286457	0.268658	0.380927	0	0												BERQIA_clean
BETDAH_clean		1992.02	1712.75					0.605373	0.482105	0.0994243	0.657272	0.0839165	0.0599882	0.161998	1669.31	1435.34					-1.05719	1.00181	-1.20934	0.350169	0.395611	0.20087	0.345029	0.0770639	0.0563157	0.144769	1986.97	1680.79				13.347	14.354	16.0338	116.591	98.6195	90	2708.03		BETDAH_clean
BETDEL_clean		1928.58	1656.01					0.372718	0.416846	0.194476	0.369113	0.0907135	0.0702488	0.157493	1876.22	1611.08					-0.706135	1.15332	-1.18412	0.350386	0.419541	0.230615	0.338087	0.0884095	0.0674361	0.156849	1921.48	1632.18				13.609	13.908	15.9868	115.784	98.1631	90	2690.54		BETDEL_clean
BETDIP_clean		1628.18	1379.11					0.539748	0.377522	0.167151	0.593587	0.0713193	0.0495761	0.14456	0	0					-1.05956	-3.51243	-2.42485	0.679131	0.54087	0.165589	0.732855	0.0909724	0.0749082	0.145083	0	0				13.09	13.953	15.9801	96.908	114.178	90	2639.4		BETDIP_clean
BETDOV_clean	occupancy	1170.59	864.961					0.289827	0.439182	0.254782	0.256691	0.132148	0.112389	0.2017	993.899	734.384					-1.01019	-0.888024	-1.67826	0.25783	0.41884	0.225787	0.221943	0.136565	0.11909	0.198078	905.158	646.761				28.747	14.448	13.3229	90	99.7621	90	5453.37		BETDOV_clean
BETDUB_clean		1445.3	1236.3					0.511821	0.367966	0.19939	0.558843	0.0751315	0.0518818	0.153446	0	0					1.78833	-1.33799	-2.92295	0.270406	0.357822	0.294715	0.248454	0.0936475	0.0691401	0.176199	0	0				12.699	14.26	15.9467	96.8971	113.466	90	2626.13		BETDUB_clean
BETFAJ_clean		1965.33	1768.84					0.439669	0.373823	0.207465	0.46476	0.0753361	0.0496193	0.161961	1722.19	1550.06					-1.93779	1.53486	-2.54472	0.202291	0.283759	0.323154	0.177905	0.0879641	0.0641285	0.168252	1852.79	1612.28				13.552	14.314	16.0843	116.421	98.7471	90	2753.61		BETFAJ_clean
BETFEN_clean		1888.9	1751.23					0.399746	0.351049	0.277119	0.416338	0.0790578	0.0514983	0.17189	1716.82	1591.72					-2.83468	2.58898	-3.12254	0.24976	0.327285	0.404455	0.224966	0.105195	0.0720949	0.216688	1806.84	1605.5				13.635	14.315	16.1146	116.368	98.6334	90	2778.25		BETFEN_clean
BETFIR_clean	occupancy	0	0					0.593556	0.806859	0.471277	0.53893	0.178729	0.14151	0.294855	0	0					3.8567	-11.7105	-35.9711	1.79779	2.25778	1.23108	1.69044	0.39116	0.284478	0.72401	0	0				28.667	14.911	12.0132	90	106.272	90	4929.39		BETFIR_clean
BETFOX_clean	occupancy	0	0					0.309166	0.359277	0.155213	0.301904	0.106938	0.094778	0.152408	0	0					0.667023	0.152545	-0.945411	0.310674	0.364334	0.165527	0.302317	0.111205	0.098415	0.159027	0	0				33.657	14.291	12.8304	90	124.039	90	5113.91		BETFOX_clean
BETFUD_clean		2024.6	1904.71					0.360699	0.33474	0.293104	0.369633	0.0740149	0.0472819	0.164063	1818.31	1710.77					-2.57445	1.00354	-3.4532	0.222752	0.298861	0.393036	0.197675	0.102363	0.0685933	0.216114	1878.54	1670.73				13.51	14.569	16.249	116.633	99.036	90	2814.43		BETFUD_clean
BETGAK_clean		2030.27	1912.59					0.850604	1.19708	1.85134	0.727422	0.155567	0.0507919	0.508495	2108.77	1986.55					-4.37618	-1.92562	-5.21889	0.358605	0.552638	1.12449	0.281402	0.180787	0.0981523	0.459136	1751.95	1461.94				13.509	14.536	16.2528	116.563	99.0232	90	2810.4		BETGAK_clean
BETGEO_clean		1180.77	896.103					0.331136	0.677587	0.540891	0.274573	0.0711006	0.0213164	0.140032	1288.22	977.585					0.328189	0.328189	0.32765	0.298875	0.629235	0.512247	0.242615	0.073143	0.0239623	0.141239	1287.5	986.746				18.556	18.556	18.556	90	90	90	6389.3		BETGEO_clean
BETGIS_clean		911.588	671.239					0.481199		0.268296	0.516196	0.0622284	0.0204231	0.115978	1199.27	883.029					-1.43659	-1.43606	-1.43659	0.510134		0.214839	0.558676	0.0592776	0.0318034	0.0946017	1184.27	834.982				18.648	18.648	18.648	90	90	90	6484.8		BETGIS_clean
BETGOY_clean		1126.19	878.898					0.143423		0.418281	0.0956213	0.083888	0.0296701	0.165215	1090.19	850.868					-2.76572	-2.76572	-2.76572	0.227235		0.344335	0.20687	0.0988857	0.0511952	0.170422	1079.54	774.505				18.502	18.502	18.502	90	90	90	6333.68		BETGOY_clean
BETGUE_clean		1243.81	1691.76					0.15363		0.184968	0.151672	0.053515	0.0405054	0.112058	1244.53	1692.85					-4.77401	-4.77401	-4.77401	0.17458		0.20433	0.17272	0.0995425	0.0771731	0.200204	1267.61	1488.8				18.798	18.798	18.798	90	90	90	6642.55		BETGUE_clean
BETHEP_clean		1129.04	728.292					0.586852		0.744154	0.559093	0.168334	0.024368	0.384282	1055.48	680.787					-0.163259	-0.163259	-0.163259	0.610249		0.754909	0.584721	0.175923	0.0318404	0.392046	1079.21	692.081				19.294	19.294	19.294	90	90	90	7182.35		BETHEP_clean
BETHIT_clean		1230.87	1501.81					0.0453159		0.0611839	0.0443241	0.0268292	0.0256365	0.0321967	1227.93	1498.22					-0.682264	-0.682264	-0.682264	0.062332		0.0503412	0.0630814	0.0339039	0.0297819	0.0524529	1235.5	1476.83				19.362	19.362	19.362	90	90	90	7258.56		BETHIT_clean
BETZOR_clean		1341.48	1256.87					0.416039	0.500109	0.47565	0.397871	0.0850464	0.0465047	0.306019	1336.48	1252.16					-1.13042	-4.35917	-2.12777	0.30037	0.441314	0.375692	0.270967	0.103618	0.0733723	0.277029	1211.7	1052.53				15.251	21.504	22.8077	118.126	107.652	90	6194.47		BETZOR_clean
BEVQID_clean		0	0					0.268156	0.309355	0.000422402	0.286156	0.108746	0.0200055	0.172131	0	0					-41.4336	-28.4699	-27.2322	1.27864	1.5202	1.25611	0.803964	0.611704	0.52939	0.6705	0	0				8.608	9.03589	9.03589	76.8864	61.5545	61.5545	543.362		BEVQID_clean
BEVQUP_clean		0	0					0.358564	0.593628	0.000431657	0.0675041	0.101081	0.17076	0.0694091	0	0																				9.15	9.30359	9.30359	76.0064	60.5446	60.5446	600.479		BEVQUP_clean
BEVRAW_clean		0	0					0.406895	0.46178	0.00056414	0.449499	0.132307	0.0376794	0.199899	0	0																				8.429	9.00574	9.00574	77.3525	62.1004	62.1004	533.94		BEVRAW_clean
BEVWAB_clean	occupancy	1367.18	1203.56					0.460585	0.202835	0.649716	0.481739	0.258826	0.25495	0.275739	1176.02	1035.25					-1.89127	2.77348	-4.13883	0.583372	0.253289	0.421986	0.636621	0.223499	0.212395	0.271955	1096.55	913.27				27.96	26.62	6.1008	90	94.9555	90	4523.82		BEVWAB_clean
BEWCUD_clean	occupancy	2109.36	4427.07			collapse		0.236093	0.0294331	4.45138	0.095162	0.48396	0.0627384	3.41691	2152.4	4517.41					0.666754	0.666428	0.522499	0.232579	0.0385755	4.4628	0.0897759	0.48152	0.0601394	3.41558	2135.63	4565.9				30.701	30.701	28.957	90	90	90	27293.5		BEWCUD_clean
BEWVEG_clean	occupancy	1358.8	1227.06					0.689837	0.452076	0.417398	0.835645	0.209538	0.252161	0.11922	1294.93	1169.34					1.27176	-2.05784	-4.644	0.473824	0.356477	0.262166	0.552806	0.252404	0.314499	0.120823	1149.36	971.23				15.278	15.5595	18.1738	64.6663	78.1242	61.048	3416.77		BEWVEG_clean
BEWVOQ_clean		2356.77	3284.44					0.296971	0.272623	0.286161	0.34927	0.135717	0.104928	0.161374	2318.88	3231.58					2.58937	-4.04526	-7.56505	0.205135	0.234162	0.144219	0.167386	0.0941	0.0569471	0.125061	2340.56	2972.75				15.293	15.5986	18.1942	64.6847	77.9865	61.077	3434.05		BEWVOQ_clean
BEWWEH_clean		2283.08	3197.75					0.964117	0.973759	0.878319	0.973431	0.192117	0.126946	0.247978	2379.41	3332.8					-0.488691	-0.859286	-4.56255	0.387918	0.383318	0.342176	0.412366	0.0975114	0.0780148	0.114223	2281.18	3008.3				14.529	20.878	22.757	90	90	90	6903.03		BEWWEH_clean
BEXPAX_clean		3095.79	4133.18					0.360404	0.548582	0.184447	0.334188	0.0902011	0.0724778	0.209834	2433.18	3248.61					-4.10828	-0.758689	-3.2253	0.662165	0.74555	0.235278	0.666408	0.0927666	0.0827998	0.160043	2043.57	2506.82				8.524	17.214	17.2142	120	90	90	2187.47		BEXPAX_clean
BEXQIF_clean		2150.53	3144.22					1.03987		0.95754	1.04536	0.103933	0.0276178	0.256562	2342.76	3425.28					-3.78781	-4.0155	4.26712	0.447079		0.32622	0.455137	0.10456	0.036324	0.241031	2334.55	3286.62				13.91	17.037	20.815	90	90	90	4932.84		BEXQIF_clean
BEXQOL_clean		2148.13	3072.1					0.711804		0.625387	0.717565	0.101109	0.0289551	0.245417	2309.63	3303.14					-4.17826	-3.96368	4.45215	0.442051		0.297391	0.451695	0.100125	0.0373149	0.225744	2307.37	3171.83				13.872	16.949	20.772	90	90	90	4883.84		BEXQOL_clean
BEXQUR_clean		2155.4	3054.41					0.966019		0.932774	0.968235	0.0824399	0.034132	0.179056	2272.95	3221.05					-1.15475	-3.52741	6.12072	0.513471		0.371457	0.522938	0.0876766	0.0427131	0.177604	2310.88	3313.81				13.804	16.868	20.764	90	90	90	4834.81		BEXQUR_clean
BEXRAY_clean		2317.02	3623.81					0.927622		0.838529	0.933562	0.128743	0.0286532	0.328922	2349.67	3674.7					-5.28941	-3.35039	2.55425	0.546541		0.449088	0.553038	0.120129	0.0336625	0.293061	2390.26	3509.39				14.376	16.905	21.634	90	90	90	5257.63		BEXRAY_clean
BEXREC_clean		2329.94	3501.82					0.971062		0.775367	0.984109	0.101686	0.0295442	0.245969	2228.2	3348.96					-2.99941	-2.10775	-0.655495	0.499757		0.31958	0.511768	0.0895576	0.0282593	0.212154	2302.23	3264.05				14.223	16.705	21.602	90	90	90	5132.53		BEXREC_clean
BEXRIG_clean		2325.64	3459.64					0.864119		0.705719	0.874679	0.0845341	0.0320612	0.18948	2311.96	3439.09					-0.551731	-3.66087	-0.644016	0.381836		0.225509	0.392258	0.0695521	0.0306265	0.147403	2302.07	3259.88				14.119	16.654	21.583	90	90	90	5074.98		BEXRIG_clean
BEXRUT_clean		1152.4	1076.26					1.33095	1.64173	1.44037	1.2918	0.0497166	0.0454403	0.0839265	1218.9	1138.42					-8.51817	-5.69727	1.16349	0.617311	1.1369	0.205396	0.583708	0.128382	0.116792	0.2211	0	0				12.232	12.4431	17.748	90	90	112.511	2495.49		BEXRUT_clean
BEXSAA_clean		1171.01	1179.54					1.30917	1.27819	1.18868	1.31895	0.0752777	0.0464652	0.305778	1376.15	1386.23					-5.02278	-9.62726	-8.00429	0.449645	0.76166	0.478109	0.41469	0.161932	0.145756	0.29134	0	0				12.553	12.6635	18.189	90	90	113.389	2653.83		BEXSAA_clean
BEXSEE_clean		1100.7	1048.55					1.32442	1.5085	1.08029	1.31778	0.0592256	0.0428441	0.190278	1144.22	1090.1					-9.82864	0.697088	-14.6968	0.933755	1.81224	0.867849	0.843162	0.145716	0.145244	0.14949	0	0				12.518	17.86	12.344	90	112.601	90	2547.83		BEXSEE_clean
BEXSII_clean		1765.13	1871.77					0.194457	0.22974	0.0421074	0.196462	0.0447885	0.0374022	0.0763035	1705.74	1808.84					1.4766	2.5763	0.40877	0.117148	0.156643	0.0645702	0.112586	0.0499438	0.045013	0.0709819	1837.1	2033.25				11.642	14.952	16.6103	90	93.8939	90	2884.7		BEXSII_clean
BEXTUV_clean		660.267	505.844					3.6332	4.0383	5.01118	3.47788	0.896164	0.919158	0.735207	0	0					-5.00335	-4.24887	-2.12165	0.897768	0.736379	0.726897	0.938642	0.594528	0.644602	0.244014	0	0				11.187	11.1861	11.9247	69.7505	69.7517	82.3661	1313.35		BEXTUV_clean
BEXVAD01_clean	occupancy	0	0					2.40734	2.73609	2.70641	2.32206	0.331964	0.363708	0.129597	463.685	338.632					0.334703	-12.0096	8.07327	0.646798	0.499518	0.430158	0.689864	0.333017	0.362394	0.145739	0	0				16.791	14.107	12.2282	90	119.02	90	2532.85		BEXVAD01_clean
BEXVAD_clean	occupancy	0	0					2.43093	2.81212	2.64546	2.34489	0.412067	0.452692	0.127696	0	0					-3.4995	-7.31232	20.7404	1.07338	0.756583	1.25585	1.12484	0.449612	0.468511	0.317315	0	0				16.817	14.264	12.0072	90	118.471	90	2531.92		BEXVAD_clean
BEXVEH_clean		2206.22	2818.25					0.327594	0.401862	0.366656	0.302383	0.0500413	0.0489356	0.0544231	2239.98	2861.43					1.71593	2.6781	1.31113	0.109969	0.130561	0.0969669	0.104766	0.0505216	0.0491285	0.0560423	2215.5	2995.05				18.742	22.86	29.669	104.858	90	90	12286.4		BEXVEH_clean
BEXVIL_clean	occupancy	2261.35	2554.66					0.823189	0.646623	0.887426	0.86599	0.291097	0.29232	0.285763	2245.91	2537.34					-1.94657	-1.02347	13.9568	0.809721	0.663203	1.94654	0.773005	0.322995	0.30657	0.394665	2365.01	2934.28				14.318	14.402	22.6166	90	100.499	90	4585.64		BEXVIL_clean
BEYKEX_clean	Z>86	1000.98	522.096												NA	NA															NA	NA												BEYKEX_clean
BEYSEF_clean		1184.79	1004.24					0.193814	0.114369	0.235131	0.199158	0.0808755	0.0571078	0.184589	1229.98	1042.56					-4.95104	-5.0446	-4.88466	0.271246	0.0981682	0.232924	0.288722	0.113659	0.119384	0.0886782	0	0				15.819	15.8188	15.8189	100.846	113.948	113.948	2996.61		BEYSEF_clean
BEZDUH_clean		0	0					0.50925		0.399793	0.529151	0.116567	0.0581928	0.190076	0	0					1.51454	-11.6284	-27.8634	1.38145		1.55618	1.34968	0.27966	0.259824	0.304638	0	0				7.574	8.50258	15.4941	99.5657	103.01	90.6739	957.411		BEZDUH_clean
BEZSIK_clean	metalvsorganic	1694.65	964.251					0.815698	0.613023	2.43692	0.572525	0.199626	0.0605619	0.651583	2176.24	1238.3					-11.2921	-18.0051	3.24252	0.614609	0.55966	2.25246	0.309018	0.329693	0.2362	0.633544	0	0				10.39	11.601	10.4984	115.152	90	90	1145.44		BEZSIK_clean
BIBBUL_clean		0	0					0.217171	0.152168	0.142679	0.220823	0.064644	0.0643661	0.0688123	0	0					-1.24363	-4.25029	-2.4081	0.214598	0.147668	0.193729	0.217361	0.0886065	0.0901541	0.065393	0	0				8.708	15.686	19.368	90	90	90	2645.55		BIBBUL_clean
BIBMAC_clean	occupancy	0	0					1.4546	1.80185	1.64771	1.39569	0.548454	0.417214	0.88079	0	0					-9.81454	-7.39485	-6.67013	1.47505	2.10107	1.63976	1.38265	0.682283	0.574794	0.954471	0	0				16.473	18.9711	19.2321	108.407	108.936	106.424	4871.99		BIBMAC_clean
BIBMEG_clean	occupancy	0	0					1.96461	1.81895	2.03414	1.97621	0.887336	0.907269	0.821979	429.608	242.672					-3.54949	-6.05425	-8.59721	1.63836	1.9943	2.19936	1.55046	1.01968	0.994409	1.10253	0	0				16.994	18.9135	18.9478	108.313	106.719	109.065	4920.47		BIBMEG_clean
BIBMIK_clean	occupancy	0	0					0.734779	1.65098	0.798756	0.623349	0.484054	0.449287	0.647503	0	0					-0.976289	-5.15894	-4.32749	0.915128	1.67068	0.777655	0.831691	0.503967	0.473645	0.646518	0	0				12.568	13.5896	25.6801	80.4977	76.8712	76.6059	4125.8		BIBMIK_clean
BIBXIV_clean	n= 1328	1467.32	1470.7												NA	NA															NA	NA												BIBXIV_clean
BIBXOB_clean		2038.78	4978.06					0.125925	0.00724897	0.192997	0.126934	0.0758039	0.0598009	0.125413	2035.39	4969.92					-0.226977	1.60234	-0.402982	0.300482	0.527899	0.354115	0.290174	0.100294	0.0600402	0.22508	2036.17	5057.79				22.954	22.9542	22.954	60.0008	60.0001	60.0003	8552		BIBXOB_clean
BIBXUH_clean		1877.8	2538.24					0.287932	0.576563	0.317593	0.274805	0.0892656	0.0528298	0.187642	1851.98	2503.34					-1.61926	1.19578	-1.20135	0.306757	0.607208	0.325562	0.293737	0.0952398	0.0567669	0.199117	1847.28	2476.56				17.947	17.9463	17.9462	59.9992	60.0005	60.0005	4087.19		BIBXUH_clean
BIBYAO_clean	occupancy	1548.16	1035.42												NA	NA															NA	NA												BIBYAO_clean
BICPOT_clean		1077.43	676.411					0.125741	0.141597	0.102839	0.0933222	0.022077	0.0174071	0.026228	1055.2	662.417					2.97256	0.544084	-1.48063	0.112321	0.122279	0.0924919	0.0963213	0.0311886	0.0198297	0.0412853	1081.53	692.392				21.759	13.821	14.2233	90	98.8491	90	4226.48		BICPOT_clean
BICPUA_clean		2045.45	3761					0.0973687	0.0592636	0.188279	0.0995514	0.0655634	0.060448	0.100519	2064.79	3796.57					-0.605099	-0.604595	-0.907622	0.10532	0.070141	0.183319	0.10751	0.0713689	0.0654875	0.111558	2075.45	3736.3				19.848	19.8481	27.853	90	90	120	9502.51		BICPUA_clean
BIDPOV_clean	occupancy	2285.54	3690.5					0.230044	0.0628856	0.0422681	0.262982	0.143917	0.157121	0.0441545	2175.8	3513.29					1.1768	1.1752	0.565546	0.226558	0.0552129	0.0632108	0.259202	0.141204	0.153216	0.0504462	2193.19	3645.67				18.678	18.6775	54.443	90	90	120.001	16448.2		BIDPOV_clean
BIFGOO_clean		1069.47	610.407																		0.0648508	0.064332	5.6923	0.491317	0.514679	0.158122	0.518071	0.115091	0.0977988	0.14901	1074.4	648.973												BIFGOO_clean
BIFKEI_clean		1415.78	1386.28					0.759334	0.444466	0.746204	0.764784	0.0992982	0.0819573	0.188671	1056.99	1034.92					5.01994	-0.927532	0.776416	0.252381	0.634104	0.383827	0.240442	0.0983086	0.085696	0.163312	1578.43	1615.5				12.287	12.9155	18.1989	86.735	70.443	80.1475	2681.28		BIFKEI_clean
BIGZUO_clean		1414.52	4588.05					0.0999368	0.0946285	0.123295	0.0988589	0.0688027	0.0582288	0.103168	1429.8	4637.68					0.159717	0.159267	0.123828	0.097399	0.0958834	0.124864	0.0952008	0.0684699	0.0576917	0.103499	1426.8	4648.43				44.391	44.391	23.258	90	90	119.999	39691.5		BIGZUO_clean
BIHBAX_clean		1482.47	4608.64					0.161974	0.182703	0.236105	0.151152	0.0619821	0.0553437	0.0835567	1502.72	4671.59					0.00812348	0.00812348	0.258604	0.16258	0.182981	0.242562	0.15129	0.0615831	0.0545678	0.0843825	1500.64	4677.95				24.62	24.62	83.68	90	90	90	50722.2		BIHBAX_clean
BIHBEB_clean	occupancy	1540.86	2127.44					1.55228	0.792974	1.35592	1.64661	0.593102	0.598886	0.536712	1268.32	1751.17					1.68694	7.0798	7.93192	0.859364	0.353744	0.514843	0.930622	0.485417	0.50014	0.341872	1366.38	2247.04				22.858	22.8583	14.042	90	90	120	6353.92		BIHBEB_clean
BIHMUC_clean		0	0					0.396824	0.447118	0.26412	0.395776	0.0692265	0.0601109	0.126958	0	0					-1.21507	-4.62984	-5.28442	0.364864	0.461686	0.274182	0.357903	0.100307	0.0963103	0.125619	0	0				10.041	11.2142	14.3104	87.4536	84.2972	68.8675	1495.51		BIHMUC_clean
BIHRER_clean		0	0					0.345536	0.857789	0.457435	0.33296	0.0812842	0.064283	0.334603	0	0					-2.4688	-0.876171	-0.279343	0.362644	0.83612	0.412388	0.351788	0.0967622	0.0795036	0.353915	0	0				12.33	22.747	26.7772	90	101.158	90	7368.25		BIHRER_clean
BIJDUV_clean		1422.73	1586.68					0.153307	0.237251	0.329414	0.144156	0.0839599	0.0762123	0.143123	1409.02	1571.35					-1.60241	0.584753	-1.84634	0.189349	0.258853	0.330368	0.181881	0.0895199	0.0832875	0.137113	1348.26	1460.71				16.762	34.442	18.447	90	90	90	10649.8		BIJDUV_clean
BIJFAD_clean	occupancy	1498.53	1750.65												NA	NA					-1.3064	4.96099	-4.49772	0.37829	0.421478	0.875312	0.362716	0.0996367	0.0818206	0.232663	1367.25	1580.19												BIJFAD_clean
BIJJOV_clean	occupancy	0	0					0.742999	0.395694	0.295234	0.811259	0.575709	0.613386	0.233721	0	0					5.68517	1.60103	2.93222	0.792591	0.520695	0.551485	0.842609	0.503036	0.51666	0.379375	0	0				13.338	21.499	10.1526	90	95.0008	90	2900.21		BIJJOV_clean
BIMDEF_clean		0	0					0.0559849	0.0602417	0.0226612	0.0572385	0.0420461	0.0417722	0.0431417	0	0					0.27201	0.27306	0.671043	0.0564182	0.0615827	0.0373708	0.0562943	0.0441081	0.0431186	0.0480659	0	0				8.573	8.57284	14.3355	87.0845	87.0851	81.7442	1040.31		BIMDEF_clean
BIMDIL_clean		0	0					0.0554147	0.0523506	0.0637998	0.0557125	0.0459438	0.041122	0.0652311	0	0					1.10416	1.06766	1.73086	0.0540959	0.0636808	0.0248308	0.0533979	0.0481065	0.0444715	0.0626465	0	0				8.467	8.467	14.444	90	90	90	1035.49		BIMDIL_clean
BINCUY_manual		2090.23	3579.34					0.124746	0.135178	0.0597302	0.125099	0.0331525	0.026963	0.109489	2115.09	3621.92					-0.708796	-0.706998	-0.715088	0.102756	0.117983	0.0506399	0.102623	0.0300523	0.0254458	0.0868648	2100.97	3521.63				22.249	22.249	22.249	90	90	90	11013.7		BINCUY_manual
BINDAF_manual		2074.42	3453.92					0.0887404	0.11788	0.213384	0.0850859	0.0366375	0.0300931	0.117351	2092.81	3484.53					1.24189	1.23962	1.24779	0.110659	0.136722	0.211439	0.107552	0.0431975	0.034228	0.153821	2114.44	3653.49				22.039	22.039	22.039	90	90	90	10704.7		BINDAF_manual
BINMIW_clean	occupancy	969.827	911.776					0.666122	1.32496	0.432045	0.575098	0.362775	0.346102	0.470815	952.925	895.881					0.093534	3.23235	1.31355	0.846739	0.964086	0.697955	0.834097	0.203504	0.180308	0.353816	NA	NA				12.295	30.755	24.7645	90	97.5294	90	9283.53		BINMIW_clean
BINROH_clean	n= 1080	1817.49	3607.11					0.108457	0.182663	0.0458561	0.102602	0.0631716	0.064787	0.0459407	1814.93	3602.03					0.776296	0.776296	0.776296	0.096583	0.106829	0.0574026	0.0965379	0.0620954	0.0631357	0.0509988	1823.78	3704.55				32.99	32.99	32.99	90	90	90	35904.3		BINROH_clean
BINRUN_clean	n= 1080	1830.53	3577.09					0.111169	0.150408	0.239417	0.104039	0.0531425	0.0502225	0.0842886	1816.47	3549.53					0.651771	0.651771	0.651771	0.0676253	0.0313399	0.266037	0.0662935	0.0497792	0.0465292	0.084446	1834.21	3654.82				32.864	32.864	32.864	90	90	90	35494.5		BINRUN_clean
BINSAU_clean	n= 1080	1831.6	3883.99												NA	NA					-1.89336	-1.89336	-1.89336	0.22571	0.363685	0.463789	0.205961	0.0914134	0.0692445	0.327881	NA	NA												BINSAU_clean
BIPBAF_clean	occupancy	2213.14	2830.85					0.50071	0.414014	0.232286	0.548034	0.141304	0.161161	0.0611432	2297.51	2938.79					7.44513	-0.92981	1.46927	0.603032	0.528803	0.456474	0.637145	0.146447	0.165063	0.0712937	2244.16	2997.58				23.375	18.692	32.3289	90	117.404	90	12540.2		BIPBAF_clean
BIPKIW_clean		0	0																		1.04202	1.0416	1.03991	0.103696	0.172196	0.130161	0.0961221	0.0571369	0.0526919	0.0899617	0	0												BIPKIW_clean
BIPLIX_clean		1476.7	1372.47					0.217998	0.381957	0.216505	0.200579	0.0586319	0.0507567	0.0996783	1479.42	1374.98					0.667206	-1.44723	0.13846	0.232604	0.392253	0.238556	0.215297	0.0630012	0.0559924	0.099532	1447.78	1320.24				16.082	17.0738	27.8781	92.5869	105.97	116.999	6426.82		BIPLIX_clean
BIPSUQ_clean		1964.53	4490.44					0.112158	0.122678	0.0728141	0.112343	0.0508916	0.0522856	0.0437866	1980.36	4526.6					1.00642	1.00701	0.269008	0.0930693	0.0786743	0.0503266	0.0982684	0.0515681	0.0528138	0.045219	1965.34	4595.54				33.783	33.7833	43.456	90	90	120.001	42951.3		BIPSUQ_clean
BIQFOW_clean	metalvsorganic	0	0					0.276095	0.292033	0.259077	0.241043	0.0191748	0.0140548	0.023412	0	0					-20.4555	-18.7152	-30.1448	3.79763	3.81662	3.78035	3.75363	0.720228	0.500265	0.902267	0	0				11.391	12.4138	12.8463	71.0427	68.3907	66.882	1518.34		BIQFOW_clean
BIQHEQ_clean		0	0					0.962976		0.562527	0.986813	0.053454	0.0562804	0.0453007	542.712	478.912					2.23395	-4.65666	-1.51994	0.156851		0.0508061	0.163163	0.0694125	0.0776901	0.0455348	0	0				11.5	15.835	17.52	90	90	90	3190.44		BIQHEQ_clean
BIQRIE_clean	occupancy	0	0					0.953325	1.06647	0.738912	0.860435	0.256319	0.135983	0.446852	0	0					0.02259	-9.60367	-24.6934	1.79718	1.69619	1.46578	1.98466	0.474882	0.338129	0.691407	0	0				23.462	8.117	16.8977	90	112.873	90	2964.98		BIQRIE_clean
BIQVII_clean		709.806	437.5					0.545046	0.782967	1.04315	0.497502	0.040913	0.0314734	0.104967	583.431	359.597		manually	86		-25.6058	-19.2892	-45.7981	7.47395	7.59563	7.94359	7.44398	3.14035	3.10645	3.37037	0	0				10.144	15.5258	18.0282	103.423	90	109.067	2601.35		BIQVII_clean
BIRGIU_clean		1103.11	805.606																		-5.44609	-12.3678	-3.98695	0.896128	0.991015	0.342022	0.911308	0.370612	0.342734	0.501804	0	0												BIRGIU_clean
BIRLIZ_clean		0	0					0.267128		0.311447	0.265424	0.119059	0.123953	0.0896954	0	0					-2.2462	-2.17345	-4.08629	0.371916		0.377368	0.371706	0.157651	0.163503	0.122543	0	0				17.323	9.282	29.8391	90	93.7258	90	4787.75		BIRLIZ_clean
BIRMUM_clean		421.045	333.605					0.232432	0.33734	0.246704	0.221252	0.076469	0.0619062	0.196612	420.926	333.516					-3.48185	-3.70506	-2.27133	0.189403	0.236249	0.146024	0.185554	0.101364	0.0961324	0.144529	342.671	246.933				21.075	7.024	31.99	90	104.356	90	4587.63		BIRMUM_clean
BIRSEC_clean		1045.63	781.502					0.381253	0.302681	0.203731	0.418495	0.0660538	0.052931	0.0977929	1079.75	807.001					-2.25078	-2.67909	-3.55441	0.313099	0.233922	0.158674	0.34859	0.0916451	0.0837007	0.11086	883.74	606.006				13.111	13.848	19.978	90	90	90	3627.23		BIRSEC_clean
BIRSIG_clean		1028.48	746.03					0.29689	0.238192	0.155892	0.32541	0.0766555	0.0501907	0.140663	1008.9	731.829					4.57807	-1.94578	-1.17283	0.290015	0.218399	0.152917	0.321902	0.0802348	0.0613771	0.125844	1050.74	772.394				12.988	13.722	19.73	90	90	90	3516.31		BIRSIG_clean
BIWHAQ_clean	metalvsorganic	0	0					1.2671	1.18683	1.65066	1.05296	0.237069	0.0538583	0.370313	0	0					16.7218	-19.3753	-54.6551	2.37562	2.57569	1.50128	2.78681	1.34344	0.767915	1.762	0	0				10.39	16.087	18.717	90	90	90	3128.43		BIWHAQ_clean
BIWSEG_ion_b		1055.51	2260.48					0.0768298		0.433722	0.0480868	0.0302555	0.023995	0.071992	1067.51	2286.17					-1.59387	-1.59387	-1.59387	0.0752715		0.413045	0.0480683	0.0317507	0.0275689	0.0596294	1063.7	2170.81				29.03	29.03	29.03	90	90	90	24464.8		BIWSEG_ion_b
BIWSIK_ion_b		1697.31	2507.18					0.163402	0.705117	0.125779	0.148684	0.0736765	0.0494512	0.227104	1762.48	2603.53					-3.561	-3.56258	-3.56417	0.225074	0.613388	0.0980242	0.217446	0.100518	0.0764897	0.252698	1638.33	2170.07				25.232	25.2321	25.232	109.47	109.472	109.472	12366.1		BIWSIK_ion_b
BIWSOQ_clean	occupancy	1694.32	1710.93												NA	NA					3.4246	3.4246	3.42495	0.273507		0.262154	0.273789	0.193627	0.196139	0.148408	1758.04	1963.98												BIWSOQ_clean
BIWYAH10_clean		2806.51	3885.55					0.595081		0.302634	0.614577	0.0826503	0.0347446	0.178462	2785.09	3855.98					15.8153	5.90772	-15.2828	1.00788		1.16365	0.997495	0.146072	0.105889	0.226439	2717.98	3493.62				12.787	15.302	16.9536	90	108.356	90	3148.47		BIWYAH10_clean
BIXCOC_clean		761.446	645.016					1.51112	1.47184	0.00266534	1.54419	0.0484066	0.044036	0.168599	795.464	673.831					-1.74357	-5.37675	-4.98476	0.477869	1.0996	1.00829	0.440912	0.097627	0.0960971	0.139699	424.7	311.03				8.398	9.4355	20.3382	89.9903	79.6643	88.4392	1584.83		BIXCOC_clean
BIXXIR_clean		926.791	276.239			collapse		4.84283	4.31167	4.13194	6.00478	0.828845	0.327337	1.04571	1232.35	367.314			collapse																	13.685	13.144	22.6489	90	100.55	90	4005.12		BIXXIR_clean
BIXYEO_clean		968.324	290.04					1.50978	1.45466	1.16419	1.75874	0.240501	0.158436	0.275351	1001.35	299.911			collapse																	13.155	13.701	22.7269	100.365	90	90	4029.38		BIXYEO_clean
BIYSUZ_clean		1352.16	1017.96					0.839805	1.01985	0.446928	0.798147	0.0961197	0.0355905	0.21993	1276.94	961.335					-15.3571	-2.99596	-5.98406	0.989159	1.24809	0.856866	0.903019	0.290187	0.152683	0.571447	1059.17	615.497				8.124	30.384	15.662	90	90	90	3866		BIYSUZ_clean
BIYTAG_clean		1369.09	1023.71					1.41506	1.65277	2.98448	1.2335	0.320536	0.0571515	0.859279	1344.38	1005.21					-21.9813	2.10209	-28.6059	0.880419	1.54905	0.797782	0.642288	0.432308	0.350525	0.599592	1033.14	439.336				8.116	30.284	15.671	90	90	90	3851.7		BIYTAG_clean
BIYTOU_clean		1713.93	1678.59					0.422685	0.487392	0.49478	0.392601	0.096601	0.0355697	0.268252	1695.34	1660.4					1.09897	-5.32436	-4.98313	0.35055	0.406972	0.370213	0.328246	0.101715	0.0758005	0.1746	1605.07	1434.16				13.258	11.438	28.745	90	99.8877	90	4294.29		BIYTOU_clean
BIYVEM_clean		1354.15	952.599					0.662458	0.785973	0.723358	0.613852	0.0668073	0.0340665	0.133777	1159.47	815.61					-15.4464	-0.230129	-33.9014	2.25208	1.5656	0.840884	2.58724	0.381657	0.336608	0.473803	0	0				8.023	30.244	15.328	90	90	90	3719.3		BIYVEM_clean
BIYVIQ_clean		1298.06	915					0.595392	0.601317	0.479477	0.600262	0.0610786	0.0479356	0.0980435	1263.86	890.85					-9.27649	1.46108	-0.611325	0.508242	0.531224	0.41834	0.505334	0.0768309	0.0779575	0.0736624	1136.24	732.741				8.508	16.016	27.939	90	90	90	3807.08		BIYVIQ_clean
BIYXUE_charged		1667.95	1871.47					0.101745	0.0523393	0.018048	0.107539	0.0579314	0.0603184	0.0297839	1623.5	1821.62					0.478586	0.580397	0.530422	0.109879	0.0727267	0.011254	0.114667	0.0534794	0.0556975	0.0273249	1658.22	1902.95				24.05	24.1044	24.6221	86.0887	61.6129	61.3935	10787.1		BIYXUE_charged
BIYYAL_charged		1655.4	1844.06					0.109093	0.0557558	0.0194836	0.115339	0.0638446	0.0663607	0.0341747	1609.81	1793.25					0.323288	0.359859	0.353286	0.103559	0.06228	0.0150957	0.108624	0.0608665	0.0636018	0.0286137	1639.36	1853.14				23.972	24.093	24.5692	86.1464	61.5939	61.533	10736.4		BIYYAL_charged
BIYYEP_charged		188.449	109.191					0.25509	0.235592	0.187017	0.267223	0.0708698	0.0761287	0.062011	228.631	132.475					-5.25263	-4.54464	-2.33568	0.480186	0.494299	0.404506	0.481985	0.113903	0.129642	0.0873887	0	0				23.906	24.0394	24.5499	86.0531	61.6014	61.4989	10676		BIYYEP_charged
BIZLUT_clean		1730.4	2036.06					0.0943033	0.0501896	0.0239705	0.0995938	0.0576209	0.0607267	0.0219046	1681.6	1978.64					0.478995	0.595666	0.582396	0.0958871	0.0715288	0.0159794	0.0993218	0.0536355	0.0569804	0.015169	1720.02	2071.58				24.092	24.1914	24.3993	85.8057	61.4047	61.0278	10687.6		BIZLUT_clean
BIZMAA_clean		1757.36	2096.58					0.139191	0.0712962	0.025486	0.147402	0.0770782	0.080176	0.0414528	1685.07	2010.34					0.552364	0.431213	0.547154	0.122807	0.0687788	0.0194573	0.129502	0.0731135	0.0769848	0.0285938	1726.76	2099.55				24.024	24.1876	24.3988	84.067	61.9429	61.6518	10879		BIZMAA_clean
BIZMEE_clean		1735.03	2028.69					0.122821	0.06194	0.0295915	0.130075	0.0607592	0.0634832	0.0294339	1675.9	1959.59					0.500208	0.578832	0.512049	0.102569	0.0636562	0.0223127	0.107464	0.056844	0.0600878	0.0195402	1718.95	2050.96				24.03	24.1351	24.392	85.0321	61.3258	61.2654	10690.7		BIZMEE_clean
BIZMII_clean		1723.61	1992.18					0.105753	0.05346	0.0224317	0.112024	0.0628251	0.0656137	0.0307564	1667.34	1927.11					0.634974	0.60102	0.651164	0.100554	0.0666662	0.0155024	0.105006	0.0584157	0.0616543	0.0211718	1716.64	2030.56				24.001	24.1424	24.3557	85.6255	61.3192	60.9442	10594.3		BIZMII_clean
BOCKOT_clean		0	0					0.684289	0.753921	0.84474	0.642986	0.0753258	0.0469609	0.152316	0	0					-20.7864	10.8003	-38.3274	1.50781	1.74823	0.783389	1.45651	0.387928	0.264894	0.721878	0	0				10.545	17.5984	19.996	90	90	91.2829	3709.83		BOCKOT_clean
BOCTEU01_clean		0	0					0.614641		0.63893	0.611943	0.118645	0.0124438	0.224846	0	0					-10.5391	-10.7278	-8.96365	0.201673		0.290837	0.191766	0.103842	0.123914	0.0837704	0	0				12.149	12.284	12.216	90	90	90	1823.1		BOCTEU01_clean
BOCTOE01_clean		0	0					0.354619		0.165575	0.375624	0.0945856	0.0110423	0.178129	0	0					-9.6055	-10.6542	-10.3439	0.284867		0.0919971	0.306297	0.116252	0.118268	0.114237	0	0				8.426	9.271	12.824	90	105.759	90	964.124		BOCTOE01_clean
BOCTOE02_clean		0	0					0.346126		0.168702	0.36584	0.103902	0.00970468	0.198099	0	0					-9.79568	-10.8735	-10.4849	0.282263		0.0923349	0.303366	0.117136	0.122655	0.111618	0	0				8.438	9.302	12.8483	90	105.567	90	971.473		BOCTOE02_clean
BOCTOE03_clean		0	0					1.06685		0.768919	1.09996	0.303174	0.0173652	0.588983	0	0					-10.0359	-11.1289	-10.7507	0.272915		0.0766656	0.29472	0.119071	0.126651	0.111492	0	0				8.464	9.324	12.8824	90	105.465	90	979.848		BOCTOE03_clean
BOCTOE04_clean		0	0					0.299026		0.00660895	0.331517	0.083763	0.00296904	0.164557	0	0					-10.0264	-11.3754	-10.7436	0.247109		0.000177658	0.274545	0.124701	0.138558	0.110845	0	0				8.453	9.358	12.8835	90	105.265	90	983.169		BOCTOE04_clean
BOCTOE05_clean		0	0					0.301132		0.0038622	0.334162	0.0826573	0.00326891	0.162046	0	0					-10.7101	-11.905	-11.0998	0.244533		0.000220201	0.271678	0.127226	0.142037	0.112416	0	0				8.502	9.431	12.9301	90	104.768	90	1002.52		BOCTOE05_clean
BOCTOE_clean		0	0					0.35563		0.149925	0.378486	0.0967022	0.0135271	0.179877	0	0					-9.60885	-10.3207	-10.2339	0.282019		0.084995	0.303911	0.113678	0.114024	0.113332	0	0				8.414	9.247	12.8074	90	105.971	90	958.008		BOCTOE_clean
BODPAN_clean	n= 4992	1889.89	2128.07												NA	NA															NA	NA												BODPAN_clean
BOFBII_clean		2628.63	5032.24					1.02868	0.595143	0.000201761	1.37401	0.181199	0.243259	0.026049	2731.4	5229.12					-8.83527	-6.68007	-2.73335	1.0206	0.925399	0.000201761	1.19574	0.160105	0.196377	0.0694267	2229.05	3602.75				12.02	11.19	11.0674	90	121.781	90	1265.42		BOFBII_clean
BOFCEG_clean		0	0					0.231261	0.169066	0.17717	0.238101	0.0423714	0.039054	0.0581287	0	0					-1.13283	-1.33671	-1.40413	0.137184	0.187124	0.138382	0.134176	0.0511794	0.0519294	0.0476173	0	0				13.762	9.563	9.88296	90	101.072	90	1276.45		BOFCEG_clean
BOFGUZ_clean		2001.81	2102.59					0.397518		1.00522	0.367132	0.0811728	0.0769667	0.125337	1884.75	1979.68					12.3163	15.3976	67.9431	5.33913		4.73073	5.36955	1.02065	0.932526	1.946	1317.24	888.837				9.99	15.153	20.3073	90	94.1511	90	3066.02		BOFGUZ_clean
BOFLIS_clean	occupancy	0	0			collapse		0.55761	1.1454	1.41782	0.190015	0.689979	0.134988	1.06497	0	0															NA	NA				7.535	11.4638	17.235	82.2847	88.015	84.3431	1467.75		BOFLIS_clean
BOHGOU_clean		0	0					0.420148	0.517844	0.3247	0.370925	0.113456	0.0274846	0.306893	0	0					-4.1278	-8.12746	-8.10605	0.268115	0.278462	0.355121	0.246716	0.120784	0.0855595	0.200039	0	0				7.731	7.8458	7.84538	116.477	103.024	103.023	384.948		BOHGOU_clean
BOHJOZ_auto		0	0					0.181527	0.241839	0.0807605	0.148392	0.0901527	0.0303181	0.138353	0	0					-0.600639	-0.600639	-0.600639	0.19699	0.254912	0.0935962	0.166162	0.0898217	0.0265011	0.14083	0	0				17.931	17.931	17.931	90	90	90	5765.19		BOHJOZ_auto
BOHWOM_clean	occupancy	935.434	763.752												NA	NA															NA	NA												BOHWOM_clean
BOHXIH_clean	occupancy	0	0												NA	NA															NA	NA												BOHXIH_clean
BOJCIN_clean		557.857	504.367					0.162677	0.103743	0.175043	0.167145	0.0725744	0.0695787	0.101987	531.004	480.082					-1.51737	0.902682	0.899323	0.159303	0.0951709	0.162733	0.164365	0.0706948	0.0683746	0.0934741	550.871	502.71				14.703	20.838	20.838	82.8493	69.3403	69.3403	5589.65		BOJCIN_clean
BOJDAG_clean	metalvsorganic	0	0					0.471666	0.216118	0.131749	0.912847	0.132565	0.191008	0.076461	0	0					-30.3823	-12.9223	-4.56089	1.74765	1.68516	1.97186	1.7717	0.717951	0.753446	0.683876	0	0				19.16	15.143	6.618	90	90	90	1920.15		BOJDAG_clean
BOJYIK01_clean		0	0					0.864042	1.04753	0.913334	0.800139	0.159497	0.0454133	0.42026	0	0					-3.36485	-0.324474	0.461933	0.69543	0.646684	0.812453	0.705177	0.158079	0.0855813	0.323787	0	0				8.547	10.1698	11.1925	65.5295	71.8852	78.7961	839.173		BOJYIK01_clean
BOJYIK_clean		0	0					0.853279	1.04265	0.907059	0.787168	0.157368	0.0430706	0.418618	0	0					-3.285	0.888649	-8.50455	1.03704	1.24162	1.54712	0.940508	0.298078	0.19293	0.538416	0	0				8.579	10.1841	11.1071	64.7825	71.7301	79.2991	832.145		BOJYIK_clean
BOKQEZ_clean		1267.02	952.954					0.352711	0.361586	0.469847	0.330921	0.124879	0.0373874	0.283583	1410.31	1060.73					-3.51639	-3.81489	-4.60429	0.210745	0.228655	0.300435	0.188503	0.116198	0.0848215	0.173115	1118.57	744.616				15.243	15.2429	20.6888	68.3857	68.3853	60.002	3767.69		BOKQEZ_clean
BOLPAU_clean		1730.89	1922.85					0.162396	0.24218	0.367861	0.136287	0.060202	0.0541824	0.0886581	1686.08	1873.09					1.01791	0.790072	0.912507	0.138751	0.205124	0.401795	0.110891	0.0573943	0.0498767	0.0929317	1736.61	1982.17				22.576	29.63	28.208	90	90	90	18869.1		BOLPAU_clean
BOLPEY_clean		1921.01	2157.77					0.448626	0.391936	0.473426	0.455439	0.0616611	0.0566293	0.0783048	1844.67	2071.97					-2.16414	-6.27204	5.47087	0.409204	0.412509	0.463238	0.404539	0.0865024	0.0823326	0.100295	1812.54	1948.59				14.597	17.6686	19.0824	75.1023	67.5147	65.6035	4112.5		BOLPEY_clean
BOLZIN_clean	n= 1040	1919.58	4110.96												NA	NA					-0.12904	0.761126	0.243655	0.128926	0.199849	0.16098	0.117837	0.0684976	0.0525722	0.139366	1910.33	4126.98												BOLZIN_clean
BOMCOX_clean		1080.87	961.973					0.0854402	0.0822074	0.0204874	0.0875297	0.049791	0.0517517	0.0335169	1048.06	932.783					-0.105314	0.0980131	-1.22071	0.104933	0.0994395	0.0512807	0.10693	0.0527006	0.0544705	0.0380106	1032.45	907.761				12.344	26.323	15.6632	90	97.561	90	5045.21		BOMCOX_clean
BOMCUB_charged		0	0					0.177145	0.245654	0.000286023	0.135898	0.057242	0.0116084	0.137101	0	0					-15.5027	-15.5138	17.1163	0.523202	0.630371	0.180072	0.466066	0.225493	0.159477	0.341021	0	0				9.025	9.02485	11.343	90	90	119.997	800.127		BOMCUB_charged
BONNIC_clean		0	0					0.284341	0.299589	0.265904	0.284054	0.0526697	0.0520844	0.0579371	0	0					-7.38142	-5.22952	-5.22952	0.432611	0.32671	0.295627	0.440915	0.119565	0.121794	0.0995004	0	0				10.43	11.2186	11.2187	98.5087	109.593	109.593	1113.81		BONNIC_clean
BONWAD_clean		0	0					0.718967	0.725385	0.469036	0.753469	0.109896	0.0365336	0.302474	0	0					-12.7549	4.41924	-26.6574	0.98019	0.993271	1.03261	0.964076	0.275051	0.2595	0.315874	0	0				9.029	10.934	13.146	90.0305	90	90	1297.81		BONWAD_clean
BONWIL_clean		0	0					0.200143	0.130326	0.177951	0.21689	0.0783998	0.0527175	0.181129	0	0					-2.64558	-6.40632	-5.27822	0.408137	0.365574	0.272021	0.425157	0.11836	0.0927209	0.220918	0	0				9.273	14.3221	16.9794	98.6598	90	108.887	2106.41		BONWIL_clean
BOPHEV_clean		0	0					0.462619	0.553921	0.502409	0.445337	0.156452	0.139191	0.247071	0	0					-1.01351	-13.4457	1.08887	0.7081	1.00628	0.511472	0.661263	0.178622	0.174747	0.198966	0	0				13.567	9.567	23.1427	90	122.672	90	2528.54		BOPHEV_clean
BOPHIZ_clean		1231.97	996.592					0.461986	0.71388	0.599206	0.397523	0.122608	0.0843689	0.283214	1289.32	1043.09					-2.75146	-5.61484	0.889004	0.472377	0.743295	0.487555	0.409158	0.105891	0.0759486	0.231649	1207.48	910.56				11.22	15.8175	18.0992	102.098	96.3857	98.9472	3067.97		BOPHIZ_clean
BOPWIO_clean		0	0					0.220825	0.401787	0.10705	0.184826	0.0735595	0.0511204	0.135267	0	0					-3.12268	-2.99016	-0.105456	0.331566	0.477144	0.195698	0.304248	0.0998292	0.0805312	0.152899	0	0				21.703	10.036	14.0343	90	91.7108	90	3055.47		BOPWIO_clean
BOQYUD_clean		0	0					0.13454	0.115673	0.119148	0.169255	0.0418296	0.0272983	0.0534547	0	0					-2.48214	-2.48021	2.12631	0.0847777	0.0726266	0.0627903	0.112166	0.0492778	0.0497273	0.0489182	0	0				10.386	10.3864	9.209	90	90	119.999	860.322		BOQYUD_clean
BORBEQ_clean		951.538	862.977					0.237803	0.178011	0.291684	0.247965	0.137501	0.13087	0.175757	0	0					-2.32877	-3.0253	-3.53962	0.407281	0.357114	0.182023	0.424823	0.156687	0.159665	0.139504	0	0				15.33	15.453	16.66	90	90	90	3946.66		BORBEQ_clean
BOSHIC_clean	occupancy	1640.99	1643.66												NA	NA					-2.77987	-0.805489	1.93368	1.16652	0.737622	0.57771	1.24085	0.469249	0.503238	0.0840478	1292.79	1301.11												BOSHIC_clean
BOSZOA_clean		1869.97	4278.42					0.105938	0.052885	0.0616064	0.119574	0.0818749	0.0960204	0.0422674	1926.16	4406.99					1.09201	1.09201	1.09201	0.102921	0.0659508	0.080663	0.112064	0.0875289	0.0970918	0.0607529	1905.59	4504.31				32.509	32.509	32.509	90	90	90	34356.7		BOSZOA_clean
BOTLED_clean		0	0					0.34767	0.218766	0.209503	0.564568	0.150766	0.0425987	0.20823	0	0																				6.292	8.67	12.9532	105.433	90.4512	105.117	655.298		BOTLED_clean
BOVHEB_clean		827.073	682.81					0.319853	0.271577	0.457383	0.318276	0.0546755	0.0538469	0.06089	792.953	654.639					-0.295254	0.837258	0.2841	0.141617	0.123612	0.257817	0.138533	0.052136	0.0516025	0.0561369	857.631	713.782				8.386	17.199	25.1319	90	94.1826	90	3615.14		BOVHEB_clean
BOWDIC_clean		979.391	972.676					0.416002	0.307903	0.322746	0.435628	0.0815918	0.0532912	0.208944	1083.29	1075.86					-0.0110646	-9.00537	-3.79146	0.478003	0.270057	0.25611	0.517597	0.0944358	0.0887794	0.11989	804.82	699.718				12.653	25.497	28.5509	90	90.9452	90	9209.65		BOWDIC_clean
BOWJAA_clean		593.638	465.26					0.970749	1.06327	1.29688	0.932216	0.0506301	0.0404435	0.101563	781.654	612.632					-6.29481	0.959935	-1.90274	0.221961	0.272364	0.347996	0.204264	0.0592327	0.0558137	0.0763276	0	0				11.117	14.991	24.3283	90	93.2164	90	4048.04		BOWJAA_clean
BOWNUY_clean		1289.34	1673.85					0.0436985		0.0884611	0.0409008	0.0344666	0.033481	0.0389019	1283.46	1666.14					-0.696976	-0.696976	-0.696976	0.129665		0.0871995	0.132319	0.0314504	0.0314566	0.0314226	1288.69	1638.26				18.623	18.623	18.623	90	90	90	6458.76		BOWNUY_clean
BOWQAG_SL		0	0					0.155381		0.0237296	0.158515	0.0549768	0.0579576	0.0214436	0	0					6.65942	-3.95738	-5.77916	0.827484		0.772003	0.828805	0.0910258	0.0908402	0.0931142	0	0				6.719	17.082	17.3519	90	98.7713	90	1968.25		BOWQAG_SL
BOWRAH_clean	occupancy	341.58	147.877					0.648127	0.576881	0.469393	0.937948	0.0755746	0.0533506	0.0940945	0	0					0.787212	0.688474	-0.208383	0.415219	0.380994	0.322199	0.558918	0.0724987	0.0512834	0.0901781	352.138	154.538				5.014	9.309	20.9228	90	110.295	90	915.952		BOWRAH_clean
BOWSOW_clean	occupancy	1054.17	646.771					1.00122	0.760293	2.512	0.939993	0.649522	0.597119	0.745593	814.374	499.655					-1.18081	-6.77323	-19.849	1.242	1.01429	0.412405	1.63563	0.789814	1.11536	0.192978	0	0				6.354	10.46	14.7694	90	90.4112	90	981.591		BOWSOW_clean
BOWSUC_clean		0	0					0.759329	0.820225	0.370656	0.802855	0.11744	0.0274773	0.197406	0	0					-2.01146	-0.715069	5.61831	0.582741	0.651054	0.273082	0.593662	0.108624	0.0476014	0.162867	0	0				13.612	9.575	14.022	90	90	90	1827.56		BOWSUC_clean
BOWZUK_clean		1135.03	1269.49					0.179561		1.38494	0.157645	0.101058	0.0636265	0.862176	1132.57	1266.71					0.55404	0.574893	0.613238	0.142306		1.3269	0.120768	0.0977935	0.0609331	0.847287	1129.74	1285.71				28.41	28.092	9.474	90	90	90	7561.14		BOWZUK_clean
BOXFOK_clean	n= 1422	1280.09	1619.28												NA	NA					0.316617	0.317191	0.316904	0.0942249	0.297852	0.143407	0.0772879	0.0607102	0.0534003	0.103873	1285.39	1641.5												BOXFOK_clean
BOXYEU_clean		0	0					0.768395	0.686082	0.800691	0.852676	0.342361	0.198558	0.534099	0	0					-5.12955	-3.20297	-12.1374	0.665198	0.436109	0.331499	0.993897	0.195455	0.221907	0.160185	0	0				11.66	10.934	11.767	90	90	90	1500.18		BOXYEU_clean
BOXYIY_clean		238.736	150.792					1.10298	0.994443	0.934872	1.25237	0.359238	0.192589	0.609211	249.163	157.367					-7.0959	-5.21596	-16.3472	0.646957	0.559443	0.435192	0.782659	0.25582	0.291916	0.201677	0	0				8.035	10.1893	16.0263	93.349	94.5057	92.4524	1304.32		BOXYIY_clean
BOYCEY_auto		2215.63	3609.05					0.08279	0.182804	0.0340391	0.0668216	0.0293899	0.0125951	0.133891	2215.27	3608.45					1.71309	1.63076	0.505474	0.0804365	0.167795	0.0610078	0.0654363	0.0376541	0.0212262	0.139872	2213.22	3746.46				18.341	18.3414	52.604	90	90	120.001	15325		BOYCEY_auto
BOYTEQ_clean		384.604	302.814					0.37969	0.196188	0.0132586	0.40589	0.0698957	0.0560376	0.180761	414.904	326.651					-8.23164	-1.86624	-4.85175	0.39199	0.162609	0.128075	0.42012	0.124213	0.118371	0.170943	0	0				19.651	14.896	8.52262	90	108.903	90	2360.21		BOYTEQ_clean
BOYYOF_clean		1434.86	1256.44					0.116864	0.105716	0.25362	0.11345	0.0641882	0.0596902	0.0847504	1453.15	1272.46					-2.68146	-2.68251	-0.932681	0.130581	0.119318	0.171869	0.13072	0.0787011	0.0785153	0.0795506	1422.68	1168.84				19.109	19.109	24.317	90	90	90	8879.45		BOYYOF_clean
BOZFIH_clean		1483.39	1405.5					0.10049	0.0578677	0.177075	0.103858	0.0638067	0.0603933	0.082746	1403.1	1329.46					0.0556511	-0.924513	-0.760714	0.117122	0.0713689	0.192679	0.121018	0.0647835	0.0613054	0.0840814	1348.91	1255.44				10.063	23.061	26.843	90	95.1167	90	6204.44		BOZFIH_clean
BOZFON_clean		863.677	694.194					0.211282	0.394767	0.134338	0.198514	0.0802333	0.0685548	0.179194	761.366	611.943					-2.02472	-1.13171	-1.47848	0.250249	0.411037	0.156075	0.239634	0.087853	0.0786337	0.165974	613.044	470.247				24.66	28.691	12.56	90	90	90	8886.45		BOZFON_clean
BOZZOH_clean		1875.34	2166.06					0.375359		0.980358	0.346549	0.0746364	0.0761552	0.0579299	1780.63	2056.75					-4.84856	-2.44213	-0.778966	0.342961		1.06534	0.308562	0.101328	0.104713	0.0640832	1848.46	1964.75				13.761	8.994	16.4836	90	107.17	90	1949.19		BOZZOH_clean
BUBQOE_clean	Z>86	0	0												NA	NA															NA	NA												BUBQOE_clean
BUBTUP_clean		0	0					0.309052	0.326685	0.883934	0.294903	0.104358	0.0677404	0.532325	0	0					-0.764081	-0.764081	-1.69066	0.282571	0.276019	0.906522	0.268122	0.11184	0.0769723	0.519351	0	0				17.969	17.969	30.189	90	90	90	9747.57		BUBTUP_clean
BUBWOM_clean		0	0					0.260669	0.267699	0.353251	0.256958	0.0561656	0.0469066	0.122962	0	0					-5.05589	-5.00472	-0.791654	0.331388	0.347451	0.411099	0.327303	0.0842377	0.0812892	0.105509	0	0				19.862	11.645	22.813	90	90	90	5276.49		BUBWOM_clean
BUCPAS_clean		0	0					0.243198	0.257272	0.000631114	0.244039	0.0561344	0.0571656	0.0200433	0	0					-1.97951	0.225584	-1.48096	0.258553	0.302	0.000696857	0.258538	0.0634966	0.0644722	0.0293519	0	0				12.326	20.702	18.2515	90	91.642	90	4655.37		BUCPAS_clean
BUCPEW_clean		0	0					0.248437	0.282428	0.000418501	0.248671	0.0574232	0.0583481	0.0250525	0	0					-2.06804	0.126065	-1.77487	0.251257	0.300031	0.000490922	0.251034	0.0654842	0.0666731	0.0238699	0	0				12.316	20.862	18.2269	90	91.6883	90	4681.12		BUCPEW_clean
BUCROH_charged		0	0					0.178099	0.18697	0.194825	0.1757	0.0709125	0.0656632	0.0810723	0	0					-4.47532	2.98206	2.21546	0.211118	0.21297	0.214687	0.210612	0.0808061	0.0862309	0.0703066	0	0				13.532	14.661	16.931	90	90	90	3358.99		BUCROH_charged
BUCSAU_clean	occupancy	0	0					1.00181	0.467524	0.616832	1.08952	0.396664	0.442357	0.272643	0	0					-0.367236	-2.50413	-1.77824	0.747553	0.24699	0.329063	0.83322	0.417661	0.464915	0.289399	0	0				13.506	15.359	15.8304	90	95.8482	90	3266.75		BUCSAU_clean
BUCSEY_clean		0	0					0.981805	0.827596	0.796374	1.01781	0.0859259	0.064323	0.125531	0	0					0.0275253	-1.2342	-2.19826	0.275619	0.31567	0.130265	0.280376	0.0953845	0.0706229	0.140781	0	0				13.442	15.265	15.8578	90	94.5428	90	3243.67		BUCSEY_clean
BUCSIC01_clean	occupancy	0	0					0.812663	0.387768	0.405437	0.888517	0.643146	0.753558	0.3403	0	0					2.48399	-1.47422	-0.208071	0.821597	0.36345	0.430844	0.900471	0.660701	0.775709	0.34525	0	0				13.724	15.072	15.8599	90	94.5023	90	3270.47		BUCSIC01_clean
BUCSIC_charged		0	0					0.190566	0.12189	0.15942	0.202759	0.0611073	0.0624606	0.058488	0	0					-0.731097	-1.91878	-2.99592	0.160471	0.103861	0.0990919	0.172836	0.0830601	0.0788786	0.0911534	0	0				13.596	14.676	17.16	90	90	90	3424.02		BUCSIC_charged
BUCVAY_clean		0	0					0.354883	0.729574	0.223153	0.342652	0.0575522	0.0561762	0.0769875	0	0					-2.97056	-2.06438	-1.00311	0.338892	0.380381	0.382264	0.33639	0.0785711	0.0790743	0.0714642	0	0				40.999	14.353	20.2567	90	108.791	90	11284.9		BUCVAY_clean
BUCVIG_clean		0	0					0.356611	0.729421	0.466971	0.339661	0.0604093	0.0571438	0.106126	0	0					-4.45816	-3.67382	0.171165	0.41324	0.684515	0.59755	0.398847	0.0885059	0.0886479	0.0865184	0	0				40.575	14.375	20.1558	90	108.058	90	11177.1		BUCVIG_clean
BUCWAZ_clean		2037.45	2065.18					0.604566	0.639969	1.23251	0.556468	0.118936	0.054499	0.358272	1963.5	1990.27					-0.489004	-0.721001	3.23242	0.39017	0.448277	0.863771	0.346044	0.113785	0.0541403	0.335321	1970.69	2036.27				14.151	14.508	25.8074	90	92.1651	90	5294.55		BUCWAZ_clean
BUCYAA_clean		0	0					0.183709	0.122916	0.0892738	0.196861	0.0468379	0.0520173	0.0323353	0	0					-4.16183	-1.65703	0.225673	0.24048	0.271466	0.164379	0.244926	0.0615523	0.0684362	0.0422773	0	0				16.541	17.4586	17.4588	97.9954	95.4725	84.5275	4952.76		BUCYAA_clean
BUDDIO_clean		0	0					0.777026	0.887375	0.59338	0.764742	0.124736	0.0560033	0.224398	0	0					-3.30849	-9.54779	-2.35547	0.544636	0.577969	0.544787	0.536291	0.154287	0.11445	0.212051	0	0				3.677	8.204	26.2922	90	92.9236	90	792.101		BUDDIO_clean
BUFNEW_charged	n= 1464	1116.54	1394.23												NA	NA					0.0936469	0.0933543	0.0924763	0.134688	0.331224	0.182063	0.115959	0.0722835	0.0535577	0.203364	1115.05	1396.28												BUFNEW_charged
BUFNOG_charged	n= 1440	1134.26	1457.02												NA	NA															NA	NA												BUFNOG_charged
BUFPAU01_charged	n= 1440	1113.89	1252.08												NA	NA					-1.49389	-1.49273	-1.4936	0.219379	0.508558	0.219069	0.192609	0.077948	0.0746033	0.119422	1143.23	1228.35												BUFPAU01_charged
BUFPAU_charged	n= 1440	1116.18	1263.78												NA	NA					-1.7873	-1.78759	-1.7873	0.209268	0.492501	0.282051	0.181695	0.0789569	0.0784849	0.0848088	1145.99	1229.21												BUFPAU_charged
BUGSAY_clean		864.224	513.421					1.83191	1.21622	1.2659	2.01413	0.0989526	0.0696079	0.176175	817.624	485.776					-16.1301	0.621902	-12.4652	1.11515	1.2027	0.370514	1.13049	0.230429	0.218787	0.261065	0	0				5.529	13.314	20.5992	90	95.2448	90	1510.02		BUGSAY_clean
BUGSEC_clean		897.469	557.854					1.94675	1.39763	1.52587	2.10507	0.114345	0.0701403	0.230675	874.807	543.795					-37.451	4.16872	1.31125	0.92936	1.15453	0.622627	0.888403	0.35852	0.314608	0.474077	0	0				5.552	13.369	20.7974	90	95.5765	90	1536.37		BUGSEC_clean
BUGSIG_clean		903.836	551.793					1.92555	1.38365	1.48213	2.0832	0.104887	0.0711038	0.19379	874.059	533.619					-23.2459	0.0194131	-2.42426	0.806198	1.0799	0.555038	0.750329	0.244244	0.211044	0.331614	0	0				5.515	13.393	20.8107	90	95.3821	90	1530.35		BUGSIG_clean
BUGSOM_clean		874.074	526.737					1.92714	1.38424	1.47965	2.08523	0.10329	0.0698676	0.191244	850.821	512.673					-17.9956	-1.5473	-9.0219	1.13038	1.16229	0.389038	1.15947	0.219681	0.20864	0.248735	0	0				5.529	13.352	20.6419	90	95.3789	90	1517.14		BUGSOM_clean
BUJKEW01_clean		0	0					0.0270751		0.000563944	0.0314936	0.0338271	0.0462482	0.0276166	0	0					-32.646	-16.2664	-29.1725	3.29055		3.18602	3.30797	1.70937	0.668218	2.22995	0	0				8.867	8.86671	21.499	90	90	119.997	1463.87		BUJKEW01_clean
BUKMEA_clean	occupancy	0	0					1.41713	0.384399	0.335521	1.53959	0.94223	0.988611	0.124245	0	0			collapse												NA	NA				15.261	27.036	9.56	90	90	90	3944.42		BUKMEA_clean
BUKMUQ01_clean		2653.95	3109.45					1.18063	1.24168	1.26763	1.16454	0.0535552	0.0409894	0.116384	2567.4	3008.1					2.09817	-0.560157	-0.327725	0.708758	0.690703	0.925971	0.694827	0.0387027	0.037851	0.0429609	2533.26	3003.47				10.829	11.193	14.799	90	90	90	1793.77		BUKMUQ01_clean
BUKRUW01_clean		2193.8	2318.49					0.289492	0.379281	0.43179	0.2452	0.11487	0.0885913	0.163804	2098.59	2217.9					-1.91103	-1.91103	-1.91103	0.334226	0.434669	0.450187	0.291881	0.117071	0.105126	0.139315	2032.07	2026.78				20.162	20.162	20.162	90	90	90	8195.98		BUKRUW01_clean
BUKRUW02_clean	occupancy	2234.56	2481.44					1.69913	1.06398	0.996747	1.96365	0.619059	0.616385	0.623976	2124.4	2359.25					-28.9699	-30.1276	-26.1314	3.76658	3.88675	3.28467	3.81217	1.49133	1.38347	1.68965	0	0				20.162	20.162	20.162	90	90	90	8195.98		BUKRUW02_clean
BUKRUW03_clean		2387.97	2884.87					0.669767	0.500745	0.598528	0.710898	0.10712	0.108797	0.103296	2333.3	2818.62					-9.66411	-9.66411	-9.66411	0.809739	0.967239	0.850887	0.775338	0.213783	0.221489	0.196212	1569.01	1397.3				20.14	20.14	20.14	90	90	90	8169.18		BUKRUW03_clean
BUKYAJ_clean		0	0					0.12302	0.103375	0.0798099	0.128176	0.0632546	0.0694601	0.0384326	0	0					-4.70505	1.09467	-2.66213	0.20822	0.117944	0.0913346	0.22681	0.0865276	0.100515	0.0305775	0	0				7.155	12.424	11.7577	90	91.7838	90	1044.68		BUKYAJ_clean
BULBER_clean		1220.66	816.677					0.235995	0.268584	0.356422	0.215388	0.0778303	0.0361426	0.195643	1256.36	840.606					-2.65308	-6.04447	-2.52506	0.23018	0.289523	0.311384	0.201663	0.10323	0.0796748	0.169798	998.347	595.489				23.26	19.137	11.893	90	90	90	5293.89		BULBER_clean
BUNKUS_clean		1256.33	3347.63																		-6.5647	-1.43369	3.31646	0.808942	0.946126	0.891686	0.78587	0.347243	0.296397	0.557889	1315.14	3439.52												BUNKUS_clean
BUNLAZ_clean		1404.07	4245.11					0.172613	0.302062	0.238564	0.15225	0.0612358	0.0300416	0.182414	1421.75	4298.57					-0.509267	-0.509267	-0.247065	0.182492	0.304289	0.234733	0.163675	0.0610135	0.0313221	0.176354	1426.93	4261.21				50.72	50.7201	15.502	90	90	120	34536.5		BUNLAZ_clean
BUPDOH_clean	occupancy	2108.67	2265.45			collapse		1.5136	1.28776	0.974456	1.5713	1.257	1.3321	0.0887	1722.99	1851.14					0.992933	-7.82354	18.8374	1.54905	1.04459	0.78196	1.66044	1.30521	1.3815	0.11849	1806.72	2101.89				18.763	18.7625	37.79	90	90	119.999	11521.4		BUPDOH_clean
BUPDUM_clean	n= 2200	0	0												NA	NA					-3.10714	-3.10714	-3.10714	0.342774		0.360643	0.340504	0.117982	0.0808525	0.185489	NA	NA												BUPDUM_clean
BUPFAU_clean	n= 2200	0	0												NA	NA		manually	69		-2.83656	-2.86568	-2.85717	0.438031		0.559178	0.42264	0.13374	0.0974032	0.197863	NA	NA												BUPFAU_clean
BUPFEY_clean	n= 2200	0	0												NA	NA		manually	68		-1.40709	-1.46087	-1.41091	1.35228		1.41743	1.344	0.135107	0.105161	0.187953	NA	NA												BUPFEY_clean
BUPVEP_clean		1174.84	690.579															manually	31		-24.909	-25.8066	-21.8018	3.55195	3.66272	3.92034	3.31216	0.552336	0.74716	0.415959	0	0												BUPVEP_clean
BUQWER_clean		533.512	422.342					0.310249	0.272807	0.571547	0.302482	0.0648186	0.0563379	0.115703	620.967	491.574					-10.7638	-10.6559	11.4671	0.740131	0.315236	0.748737	0.77518	0.137283	0.125033	0.210786	0	0				15.764	15.764	16.918	90	90	120	3640.93		BUQWER_clean
BURHUS_clean		0	0					0.893962	0.933219	0.677707	0.916173	0.0715851	0.0331732	0.122801	0	0					-3.54112	-0.11073	5.54983	0.893362	0.946467	0.529963	0.949979	0.0881098	0.0581655	0.128035	0	0				15.882	8.462	16.096	90	112.563	90	1997.62		BURHUS_clean
BURJOO_clean		598.242	437.885					0.304152	0.160099	0.000173378	0.321679	0.0585072	0.0491328	0.135065	582.553	426.405					-2.75485	-1.55914	-3.94729	0.293263	0.12352	0.000589716	0.312356	0.0806167	0.0735427	0.138388	505.35	343.688				11.144	15.2392	16.695	114.418	90	111.447	2364.35		BURJOO_clean
BURQIQ_clean		1592.56	1594.76					0.23091	0.409878	0.339337	0.193746	0.0870204	0.0603863	0.196155	1671.4	1673.73					-1.57525	-2.06657	-0.540352	0.211775	0.345634	0.275023	0.184897	0.0931137	0.0703947	0.186206	1593.02	1539.97				25.45	11.928	25.8352	90	116.776	90	7001.79		BURQIQ_clean
BUSGIG_clean		0	0					0.197261	0.166308	0.251228	0.203081	0.0610718	0.0481275	0.0853914	0	0					-0.76	-0.247551	-1	0.207253	0.165324	0.261573	0.216702	0.0658955	0.0545979	0.0871213	0	0				9.175	9.49301	21.51	90	90	116.481	1676.92		BUSGIG_clean
BUSGOM_clean		0	0					0.225089	0.199792	0.262123	0.230435	0.0718963	0.0469778	0.116038	0	0					-1.82719	-0.996513	-1.13088	0.238828	0.194829	0.278851	0.250159	0.0797747	0.0609676	0.11309	0	0				9.233	9.54981	21.585	90	90	116.004	1710.55		BUSGOM_clean
BUSNAF_clean		649.61	525.586					0.360412		0.000159892	0.366845	0.0656325	0.0569573	0.155277	718.869	581.624					-4.23375	-1.25022	-1.23396	0.321029		0.000798778	0.326747	0.0818951	0.079911	0.102398	632.5	479.281				10.126	15.9892	15.9889	64.3326	77.8141	102.186	2142.02		BUSNAF_clean
BUSQEM_clean		418.816	440.241					0.195074		8.88178e-16	0.198326	0.0566162	0.044035	0.186623	696.149	731.762					-1.31887	-3.00008	-6.04728	0.238484		2.32528e-15	0.242458	0.0937335	0.0870197	0.16311	0	0				11.616	12.503	14.891	90	90	90	2162.69		BUSQEM_clean
BUSQIQ_clean		475.637	302.989					0.0747031	0.0533446	0.038591	0.0990122	0.04097	0.0512027	0.0307373	410.587	261.549					-7.15903	1.60676	-0.319394	0.121707	0.113795	0.0261646	0.147145	0.0590075	0.0552544	0.0627607	0	0				6.994	7.48902	11.1459	107.821	106.363	95.4632	522.654		BUSQIQ_clean
BUSQUC_clean		0	0					0.35938	0.348865	0.285916	0.363106	0.0588583	0.0559621	0.0780783	0	0					-1.0864	1.00189	1.00958	0.352536	0.332819	0.256866	0.358166	0.0594222	0.0555771	0.084939	0	0				11.782	13.0055	13.0057	97.8251	105.474	105.475	1804.3		BUSQUC_clean
BUSRUE_clean		1331.75	1246.68					0.166731	0.316089	0.130078	0.158235	0.0565221	0.0523136	0.0965026	1308.35	1224.83					-0.288632	0.0812131	-1.87019	0.153163	0.247846	0.122304	0.147892	0.062586	0.0594295	0.0925733	1295.06	1185.94				11.78	29.183	14.2285	90	100.681	90	4806.67		BUSRUE_clean
BUSSEP_clean	occupancy	0	0												NA	NA					-17.3697	-11.9782	2.36048	1.75329	2.07986	1.46034	1.58691	0.462793	0.312802	0.736614	0	0												BUSSEP_clean
BUSTAM_clean	occupancy	0	0												NA	NA					-23.3813	-14.5442	2.25399	1.73959	1.89875	1.76334	1.64321	0.460192	0.337983	0.678224	0	0												BUSTAM_clean
BUVHEH_clean		0	0					0.386682	0.38523	0.415755	0.385551	0.0791134	0.0457011	0.163524	0	0					-18.0306	-1.5063	-39.7753	1.08649	1.33823	1.00169	1.0073	0.453295	0.435888	0.497271	0	0				9.285	10.3696	11.7355	96.81	93.2631	111.426	1038.25		BUVHEH_clean
BUVKUA_clean		0	0					0.617768	0.736954	0.846486	0.557086	0.170417	0.138517	0.237896	0	0					-2.1769	-10.3929	-10.7437	0.512867	0.592726	0.963898	0.456112	0.31267	0.254159	0.436444	0	0				9.789	10.0554	12.4564	92.5151	91.6239	91.493	1223.98		BUVKUA_clean
BUVVIZ_clean		0	0					0.295318	0.428247	0.318557	0.275279	0.0708752	0.0675076	0.0838921	0	0					-10.4106	-1.20098	0.298942	0.586745	0.763894	0.653339	0.55896	0.114376	0.10531	0.149416	0	0				15.566	29.759	22.7139	90	97.1547	90	10439.8		BUVVIZ_clean
BUVVOF_clean	occupancy	0	0												NA	NA					-16.0046	3.76573	1.76167	0.699747	1.12851	1.40975	0.602651	0.304619	0.142002	0.703229	NA	NA												BUVVOF_clean
BUVWOF02_clean		665.862	541.916					0.143386		0.000171591	0.14625	0.0530173	0.0552953	0.031756	659.359	536.627					-1.23857	-0.850819	-0.864285	0.100367		0.000216684	0.10237	0.0588795	0.0626719	0.0234837	615.607	486.531				9.088	16.3372	16.3371	63.3562	79.3152	100.685	2028.42		BUVWOF02_clean
BUVWOF03_clean		687.589	575.771					0.10507		0.000180992	0.107167	0.0568233	0.0595053	0.0317915	703.979	589.484					-0.900304	-1.42492	-1.42327	0.11922		0.000180992	0.121601	0.0661001	0.0711309	0.0191463	661.116	532.514				16.139	18.0991	18.0995	68.4397	72.7078	107.293	4173.97		BUVWOF03_clean
BUVXOG_clean		641.651	506.255					0.111338		0.00032431	0.113558	0.0449797	0.0479585	0.0171773	640.56	505.403					-1.53204	-0.934908	-0.923807	0.113676		0.000775672	0.115934	0.0522087	0.0560869	0.0160121	615.247	469.287				8.937	16.216	16.2156	63.2956	79.414	100.586	1966.46		BUVXOG_clean
BUVYEX_clean		666.497	550.065					0.0897455		0.000179775	0.0915368	0.0537526	0.0573529	0.0201503	673.377	555.74					-0.507278	-0.963983	-0.96287	0.102274		0.000179775	0.104316	0.0591418	0.0642516	0.0114501	657.479	528.993				16.145	17.9775	17.9778	68.5565	72.5803	107.42	4113.86		BUVYEX_clean
BUVYIB01_clean		1974.82	2891.44					0.125928		0.000342536	0.128439	0.0505273	0.0540874	0.0173002	1900.89	2783.18					-0.93078	-1.13164	-1.06813	0.130026		0.000620784	0.132614	0.0560437	0.0600199	0.0189323	1809.51	2566.45				12.398	18.8926	18.8935	64.6454	77.3643	102.636	3649.14		BUVYIB01_clean
BUVYIB_clean		1824.78	2599.16					0.145854		0.000271629	0.148766	0.0460207	0.0481306	0.026328	1770.97	2522.46					-0.484882	-1.01163	-1.00689	0.107172		0.0003684	0.109308	0.0481522	0.0517121	0.0149267	1676.4	2327.33				11.9	18.9792	18.9788	64.2481	77.9349	102.065	3549.93		BUVYIB_clean
BUWLUC_clean		0	0					0.945581	1.15573	0.758408	0.866046	0.164312	0.0694948	0.371724	0	0					-26.6807	-25.9073	-24.2	1.74612	2.01857	0.746407	1.69909	0.63745	0.575671	0.772591	0	0				13.976	13.976	17.531	90	90	90	3424.31		BUWLUC_clean
BUWMAJ_clean		1025.01	846.239					0.103505	0.167274	0.138869	0.0771015	0.0526838	0.0439002	0.0790344	0	0					-11.6095	-11.603	-51.6042	1.47667	1.78297	0.701822	1.43573	0.386171	0.254643	0.780755	0	0				13.936	13.936	17.469	90	90	90	3392.69		BUWMAJ_clean
BUWMEN_clean		1087.26	913.396					1.67996	1.5646	2.28922	1.67245	0.163465	0.041774	0.487973	1647.34	1383.94					-49.0082	-16.2632	-25.9431	1.4521	1.76599	0.385012	1.42332	0.512291	0.332713	0.991164	0	0				17.755	19.838	13.3111	90	131.833	90	3493.35		BUWMEN_clean
BUWMIR_clean		1093.43	931.554					0.11663	0.185086	0.165101	0.0873303	0.0518792	0.0405546	0.0858529	1079.17	919.408			collapse																	17.629	19.797	13.2569	90	131.701	90	3454.4		BUWMIR_clean
BUXNIT_clean		630.021	594.785					0.242047	0.455697	0.400529	0.236186	0.0667754	0.0661861	0.0803286	521.406	492.245					-2.21653	-4.36435	-0.979077	0.25985	0.411617	0.431697	0.254753	0.0930162	0.0930694	0.0917927	0	0				15.037	19.075	24.901	90	90	90	7142.37		BUXNIT_clean
BUXNOZ_clean		2065.67	2567.08					0.235624	0.197606	0.166506	0.248873	0.0577526	0.0564945	0.0631361	2094.97	2603.51					1.39574	-0.188074	1.58691	0.194048	0.158568	0.127027	0.206587	0.0547876	0.0536772	0.0595389	2080.69	2658.44				27.67	29.297	25.912	90	90	90	21005.5		BUXNOZ_clean
BUXTOF_clean		253.856	184.403					0.510413		0.550555	0.508502	0.123844	0.0548288	0.427511	0	0					5.31553	-9.9977	-1.16255	0.557801		0.511261	0.560017	0.151063	0.0961139	0.392839	0	0				22.771	21.312	19.0093	90	118.498	90	8107.35		BUXTOF_clean
BUXTUL_clean	occupancy	1105.81	890.949												NA	NA			collapse												NA	NA												BUXTUL_clean
BUXZAX_clean		1375.15	2475.61					0.16688	0.179399	0.151801	0.165769	0.0694574	0.0582886	0.104044	1423.75	2563.11					-2.88931	-2.89399	2.63494	0.280272	0.355496	0.252671	0.270491	0.0923755	0.0739505	0.149434	1419.03	2472.44				42.764	42.7642	16.756	90	90	120	26537.5		BUXZAX_clean
BUYNAL_charged		1105.67	1203.56					0.184553		0.000140756	0.185816	0.0604691	0.0618938	0.0241393	1072.76	1167.74					-6.35213	-6.35426	-6.36065	0.456393		0.000910279	0.459512	0.111865	0.111124	0.130782	0	0				14.076	14.0756	14.0756	108.345	108.349	108.349	2231.64		BUYNAL_charged
C5DT04820F_c5dt04820f2_clean		1386.2	1196.85															manually	157		-7.14437	11.562	-19.7248	1.98221	1.33849	1.31103	2.20675	0.24584	0.206895	0.312046	1052.09	758.14												C5DT04820F_c5dt04820f2_clean
C6CP04132A_c6cp04132a2_clean		873.14	856.673					1.00154	1.40303	1.51263	0.900619	0.0813275	0.0512429	0.271863	913.323	896.068					-5.06723	-8.91923	-2.98747	0.772345	0.926751	1.05683	0.728362	0.113027	0.117196	0.0866212	0	0				17.82	9.975	15.649	90	90	90	2781.68		C6CP04132A_c6cp04132a2_clean
C6DT01554A_c6dt01554a2_clean	n= 1728	1231.46	1155.79												NA	NA		manually	49		-7.69234	-7.28823	-20.1224	1.33082	0.876403	0.791047	1.42491	0.206209	0.207485	0.199264	NA	NA												C6DT01554A_c6dt01554a2_clean
C6DT02195F_c6dt02195f2_clean		1167.21	1052.39					0.0984	0.0813435	0.0319659	0.102889	0.0473228	0.0464611	0.0540247	1141.93	1029.63					0.668229	1.31598	0.722376	0.0847866	0.0887344	0.0447076	0.0855962	0.0462059	0.0454299	0.052242	1161.04	1073.5				18.048	10.38	23.423	90	96.7424	90	4357.68		C6DT02195F_c6dt02195f2_clean
C6DT02320G_c6dt02320g2_clean	metalvsorganic	1812.02	1021.56					5.53512	5.88898	5.60071	4.64385	0.560717	0.0697438	0.65394	1074.21	605.612					-35.6268	-24.1516	-11.7514	2.47869	2.40714	2.5114	2.61292	1.31645	0.596562	1.45313	0	0				12.964	25.188	19.2822	90	93.2079	90	6286.49		C6DT02320G_c6dt02320g2_clean
C6DT02408D_c6dt02408d2_clean		0	0					0.104976		0.0314603	0.105872	0.0675006	0.0688018	0.0484167	0	0					-0.411213	0.0374291	0.199222	0.109117		0.0345327	0.110027	0.0679632	0.0692023	0.0497901	0	0				11.308	26.717	14.0042	90	99.4778	90	4173.14		C6DT02408D_c6dt02408d2_clean
CABDER_clean		0	0					0.120873	0.121691	0.139852	0.120296	0.0632567	0.0571714	0.0936831	0	0					-2.45999	-2.39606	0.444573	0.286353	0.301743	0.351337	0.282805	0.0757744	0.0714129	0.0975816	0	0				16.183	28.455	17.23	90	90	90	7934.2		CABDER_clean
CABJOH_clean		1290.54	1215.44					0.219751		0.246335	0.218352	0.0651732	0.048596	0.124851	952.737	897.254					0.841153	-8.52734	-36.674	8.36716		8.98521	8.33463	0.263413	0.224548	0.403324	0	0				6.788	14.484	28.9168	90	93.2949	90	2838.32		CABJOH_clean
CABQEB_clean		0	0					0.199617	0.250024	0.104931	0.189286	0.085779	0.0730639	0.105646	0	0					-0.674449	-1.13297	-1.2272	0.20555	0.241013	0.0916678	0.203909	0.0925277	0.0828804	0.107602	0	0				11.565	17.723	17.7227	83.889	70.9588	70.9557	3245.86		CABQEB_clean
CACBUG_clean		0	0					0.182261	0.221014	0.000286245	0.185631	0.0488765	0.0470583	0.0612403	0	0					-2.96357	-8.23673	1.38204	0.358683	0.7691	0.000323742	0.343764	0.116281	0.122467	0.074212	0	0				7.408	10.89	13.6321	66.6682	78.1687	71.7797	955.018		CACBUG_clean
CACNOM_clean	occupancy	1209.55	824.358					0.474427	0.528	0.399614	0.458323	0.166081	0.166117	0.166017	1029.18	701.454					-4.44047	-2.82843	-0.63995	0.326791	0.339026	0.200589	0.341299	0.185366	0.205425	0.150546	0	0				11.911	14.358	22.2833	90	113.732	90	3488.6		CACNOM_clean
CADPIH_clean	metalvsorganic	0	0					0.971349	0.836018	0.713327	1.28802	0.32083	0.0414248	0.591505	0	0					-3.81192	-18.049	-20.5387	1.40063	1.29518	1.43118	1.56052	0.473643	0.423979	0.521755	0	0				10.283	12.0957	16.9113	76.0709	72.3803	65.1977	1804.04		CADPIH_clean
CADPII_clean		234.697	115.218					0.215373	0.2455	0.296592	0.186555	0.0733912	0.0489166	0.12234	238.575	117.123																				6.928	17.5644	17.5651	61.7018	82.4464	97.5539	1819.1		CADPII_clean
CADQAB_clean		1961.71	1758.63					0.249582	0.333817	0.354883	0.2205	0.0668666	0.0427164	0.135504	1970.2	1766.28					4.26773	0.487254	-1.4516	0.285481	0.41677	0.467719	0.239291	0.122905	0.0928813	0.208237	1795.89	1542.62				10.406	11.0622	12.4071	103.578	106.342	98.73	1295.38		CADQAB_clean
CADQOP_clean		1898.06	1730.62					0.59894	0.688596	0.405703	0.580798	0.0818571	0.054931	0.152715	1872.18	1707.06					5.10101	0.11242	-1.73371	0.304276	0.483777	0.441237	0.240383	0.132501	0.0908036	0.242232	1757.11	1526.56				10.445	11.1191	12.4302	103.726	106.489	98.3932	1308.99		CADQOP_clean
CADZIT_clean		0	0					0.35874	0.407456	0.223883	0.35952	0.0618493	0.05984	0.0874685	0	0					-0.806573	-1.03651	-0.803485	0.141031	0.180868	0.14038	0.139385	0.0654616	0.0668506	0.047752	0	0				19.961	6.081	21.693	90	92.695	90	2630.25		CADZIT_clean
CAFRUX_clean		0	0					0.0948929		0.315236	0.0894523	0.0688585	0.0696218	0.0581722	0	0					0.179251	0.179251	0.179251	0.087475		0.239883	0.0837118	0.0663449	0.0681706	0.0407854	0	0				17.35	17.35	17.35	90	90	90	5222.74		CAFRUX_clean
CAGSAG_clean		1754.04	1823.9					0.201181	0.255022	0.236558	0.185599	0.0541263	0.0527734	0.0599605	1702.89	1770.68					0.0882752	-0.431234	0.138178	0.192778	0.246383	0.232027	0.176966	0.055403	0.0539679	0.0615918	1699.31	1752.19				17.672	19.8501	20.9149	72.3819	70.9456	69.7237	6354.67		CAGSAG_clean
CAGXIU_clean		729.96	434.444					0.904387	1.25643	1.06229	0.824465	0.186583	0.0516547	0.636346	520.712	309.897					-12.6184	-7.17394	7.45157	0.538269	0.449169	0.59045	0.554658	0.138228	0.131571	0.160415	0	0				14.065	5.86	21.2679	90	95.212	90	1745.67		CAGXIU_clean
CAHLEE_clean		0	0																		-4.10487	-1.85016	1.31639	0.511864	0.805219	0.376956	0.484734	0.126649	0.0698172	0.232195	0	0												CAHLEE_clean
CAHNEF_clean		0	0					0.830876	0.902126	0.814624	0.823494	0.0931206	0.0491396	0.237058	0	0					-1.28677	-4.26522	-7.61849	0.303558	0.457385	0.653687	0.251505	0.132021	0.105487	0.21886	0	0				10.188	12.016	19.2058	92.7904	90	90	2348.37		CAHNEF_clean
CAHQAG_clean	occupancy	0	0					0.495789	0.352004	0.245542	0.514984	0.325228	0.336892	0.187204	0	0					-6.20471	1.43313	10.0507	0.833705	0.566515	0.816585	0.858958	0.52681	0.559626	0.138487	0	0				10.291	10.6555	11.4218	79.5929	75.3331	61.9054	1066.12		CAHQAG_clean
CAHQOS_clean		0	0					0.265908	0.296362	0.16108	0.241308	0.034469	0.0367571	0.0324351	0	0					-0.404666	-0.638219	1.95721	0.232648	0.250231	0.233921	0.156646	0.0557664	0.0351482	0.0740938	0	0				8.701	9.20985	12.3849	111.109	101.419	102.077	863.778		CAHQOS_clean
CAHSOU_clean	metalvsorganic	0	0			collapse		7.69454	7.29869	8.68974	7.91413	7.06569	7.80653	6.37424	0	0					-4.45294	-4.34415	-5.39883	7.69634	7.31303	8.69655	7.89823	7.06583	7.80191	6.37881	0	0				9.864	9.864	30.353	90	90	90	2953.3		CAHSOU_clean
CAHVAJ_clean	metalvsorganic	0	0					0.296338	0.228608	0.594806	0.299949	0.0897275	0.0376051	0.129822	0	0					1.98781	-7.30675	-33.2226	1.62261	1.61329	1.5725	1.67519	0.40852	0.319072	0.477327	0	0				9.645	8.877	14.8134	90	91.9343	90	1267.58		CAHVAJ_clean
CAJBUN_clean		0	0																collapse																									CAJBUN_clean
CAJHUS03_clean		0	0					0.319778	0.285028	0.000233171	0.407784	0.0954706	0.0737397	0.128067	0	0					0.818414	0.804778	-11.5147	0.304539	0.274216	0.0366267	0.379515	0.126503	0.100927	0.164866	0	0				7.334	7.33362	8.319	90	90	120.002	387.483		CAJHUS03_clean
CAJHUS04_clean		0	0					0.312559	0.279115	0.000412809	0.398028	0.0927911	0.0718261	0.124239	0	0					2.58296	-0.135485	-4.69859	0.306561	0.277586	0.0591172	0.376776	0.101824	0.0807514	0.133432	0	0				7.329	7.32916	8.316	90	90	120.004	386.836		CAJHUS04_clean
CAJHUS_clean		0	0					0.265507	0.277995	0.000429082	0.297198	0.0536953	0.00800406	0.122232	0	0					0.97138	0.949943	-8.60784	0.265186	0.262943	0.0571549	0.302102	0.0774002	0.0324589	0.144812	0	0				7.324	7.32333	8.318	90	90	120.003	386.361		CAJHUS_clean
CAJLEH_clean		0	0					0.978375	1.11355	0.991137	0.950232	0.08003	0.0438605	0.234755	0	0					-17.5652	-8.59437	-3.77279	0.831388	1.17543	0.803044	0.762854	0.153176	0.104954	0.35946	0	0				9.036	16.6645	17.242	117.192	98.9487	93.9467	2252.15		CAJLEH_clean
CAJQEL_clean		1854.29	2627.73					0.220877	0.175686	0.0574862	0.241121	0.0547921	0.0515665	0.0705622	1773.45	2513.25					1.67966	1.6802	2.19768	0.161092	0.130554	0.0934553	0.172256	0.0551226	0.050732	0.0765875	1747.83	2627.2				18.349	18.3494	19.8665	64.5273	64.5279	93.9406	5180.88		CAJQEL_clean
CAJQIP_clean		2056.15	3769.94					0.231915	0.196275	0.0723956	0.242332	0.0580129	0.0575078	0.0619411	1959.59	3592.94					1.59063	1.58898	2.40329	0.108759	0.0896653	0.0842146	0.112239	0.0571665	0.0566281	0.0613537	2084.16	4041.09				18.163	18.1625	30.8537	103.351	103.352	102.442	9238.92		CAJQIP_clean
CAJVUG_charged		0	0					0.394188	0.587472	0.330339	0.368181	0.0789207	0.0584693	0.194812	0	0					0.615963	0.619009	-0.762433	0.336185	0.490498	0.232168	0.316352	0.0724364	0.0578901	0.154866	0	0				9.848	9.848	35.059	90	90	90	3400.13		CAJVUG_charged
CAJWIV_ion_b		926.692	858.906					0.998558	1.05179	0.996496	0.992093	0.108265	0.0622784	0.336494	1163.64	1078.62					2.26442	2.29383	2.20736	0.552487	0.66997	0.790764	0.529698	0.106274	0.0616658	0.32766	1077.75	1002.09				23.119	23.1191	9.94422	101.778	101.779	24.3168	2140.41		CAJWIV_ion_b
CAKFEB01_clean		0	0					0.199668	0.353948	0.0485179	0.170982	0.0781858	0.0569638	0.136546	0	0					-2.85917	-8.20508	0.339974	0.650874	0.709769	0.481923	0.644044	0.136621	0.11954	0.183592	0	0				21.863	10.035	13.8539	90	91.5304	90	3038.4		CAKFEB01_clean
CAKFEB_clean		0	0					0.198275	0.356059	0.0407612	0.169046	0.0776271	0.0571219	0.134016	0	0					-1.56667	-3.23288	-1.46565	0.310367	0.383268	0.0776001	0.302788	0.0961362	0.0841734	0.129034	0	0				10.11	21.835	13.9866	91.6183	90	90	3086.34		CAKFEB_clean
CAKFIF_clean		0	0					0.202665	0.37207	0.0595643	0.170319	0.0782563	0.05811	0.133659	0	0					-3.05088	-2.94166	-0.998784	0.274321	0.403065	0.117271	0.251528	0.100849	0.0898242	0.131169	0	0				10.082	21.787	13.9774	91.5907	90	90	3069.04		CAKFIF_clean
CAKXET_clean		0	0					1.27377	1.09373	1.50618	1.32942	0.0679288	0.0233357	0.141507	0	0					-24.3426	-4.38209	-3.23926	1.88688	1.9682	2.1291	1.83281	0.40897	0.323521	0.549961	0	0				7.981	9.74626	15.927	90	90	96.2142	1231.6		CAKXET_clean
CAKXIX_clean		0	0					1.27251	1.09168	1.50618	1.32839	0.0675155	0.0235281	0.140095	0	0					-24.3934	-4.7328	-3.16802	1.90514	1.983	2.15292	1.85205	0.411128	0.324762	0.553632	0	0				7.981	9.7225	15.909	90	90	96.2888	1227.03		CAKXIX_clean
CAKXOD_clean		0	0					1.27025	1.09246	1.50198	1.32502	0.0678252	0.0248919	0.138665	0	0					-24.1633	-4.96946	-3.08967	1.92448	2.00024	2.16283	1.87305	0.414517	0.327185	0.558616	0	0				7.955	9.69257	15.869	90	90	96.3559	1216.05		CAKXOD_clean
CAKXUJ_clean		0	0					1.26424	1.08695	1.49265	1.31908	0.0680861	0.0250909	0.139028	0	0					-24.3112	-5.25414	-2.51704	1.95138	2.02014	2.18489	1.90326	0.417729	0.328015	0.565756	0	0				7.959	9.66389	15.844	90	90	96.4882	1210.83		CAKXUJ_clean
CAKYAQ_clean		0	0					1.26304	1.0848	1.4916	1.31826	0.0695752	0.0269703	0.139873	0	0					-2.11565	-8.25088	0.268855	0.424788	0.489814	0.556762	0.386697	0.114308	0.0900527	0.154329	0	0				7.955	9.65012	15.845	90	90	96.5572	1208.41		CAKYAQ_clean
CAKYEU_clean		0	0					1.24876	1.06962	1.47433	1.30461	0.0695299	0.0271662	0.13943	0	0					-24.1837	-5.52074	-2.03077	2.00647	2.06668	2.2242	1.96324	0.41951	0.326868	0.572369	0	0				7.938	9.62223	15.822	90	90	96.6243	1200.44		CAKYEU_clean
CAKYIY_clean		0	0					1.24341	1.06859	1.4682	1.29752	0.0696726	0.0282487	0.138022	0	0					-0.827086	-7.99179	0.315314	0.413989	0.488991	0.526508	0.373362	0.107552	0.0843216	0.145883	0	0				7.923	9.59267	15.794	90	90	96.759	1192.04		CAKYIY_clean
CAMKEJ_clean		1116.99	428.171					3.21493	3.57836	3.27467	2.99974	0.398063	0.138903	0.564666	1273.04	487.992			collapse																	15.428	15.428	16.975	90	90	120	3499.13		CAMKEJ_clean
CAMROA_clean		1184.17	904.089					0.162475	0.198776	0.190247	0.144283	0.048451	0.03164	0.0894278	1164.77	889.264					-3.035	1.10241	-0.0435025	0.168908	0.206291	0.228616	0.147871	0.0617041	0.0454349	0.10136	1146.75	854.033				35.196	11.647	17.2404	90	99.0034	90	6980.24		CAMROA_clean
CANRIU_clean		1505.57	1747.5					0.656264	0.592771	0.322609	0.683667	0.0787744	0.0796012	0.0753347	1346.62	1563.09					-1.85655	-1.43053	0.153343	0.490089	0.508525	0.336074	0.495917	0.0835978	0.0892952	0.0598967	1421.86	1597.29				12.728	14.5335	23.2816	99.8143	92.6022	97.0707	4201.67		CANRIU_clean
CANROA_clean		1475.71	1562.64					0.44207	0.367926	0.279323	0.461604	0.0682993	0.0532107	0.131068	1541.33	1632.14					0.480199	-3.83676	-0.43392	0.359845	0.341769	0.185474	0.372008	0.081864	0.0714322	0.125261	1355.97	1385.59				12.724	14.4992	23.3452	99.7326	92.6884	97.474	4198.38		CANROA_clean
CANRUG_clean		1410.75	1594.85					0.503499	0.538754	0.326476	0.507755	0.079317	0.0503496	0.175272	1475.69	1668.28					-0.0929103	-1.52447	-2.94376	0.277755	0.408546	0.211974	0.261427	0.0925274	0.0659677	0.180507	1267.55	1363.87				13.669	14.5694	23.687	90	90	114.938	4277.43		CANRUG_clean
CANYIB_clean		1544.58	1441.22					0.725711	0.915768	0.885295	0.630549	0.103387	0.0661732	0.17194	1542.68	1439.43					-3.09867	-0.660048	-0.452373	0.677242	0.812263	0.768183	0.612129	0.109344	0.0757127	0.171297	1510.54	1350.68				11.063	23.498	23.4981	120	90	90	5290.14		CANYIB_clean
CANZOH_clean		0	0					0.615559	0.6282	0.317155	0.681855	0.101953	0.0651587	0.14011	0	0					-10.8766	-10.2876	-0.276524	0.623518	0.694605	0.21357	0.634016	0.141042	0.167153	0.113964	0	0				13.872	13.8724	9.435	90	90	119.999	1572.42		CANZOH_clean
CAPLOX_clean		1971.31	1775.82					0.377009	0.544545	0.264523	0.342674	0.064753	0.0507007	0.112087	1919.56	1729.18					2.18953	-1.35882	0.626282	0.486966	0.701784	0.323976	0.443662	0.109326	0.0822078	0.200673	1728.54	1485.24				10.468	11.3263	12.7255	100.843	109.931	99.77	1347.68		CAPLOX_clean
CAQCAZ_clean		1283.9	740.548					0.314004	0.332351	0.152985	0.321293	0.100867	0.0413814	0.204321	1415.91	816.634					-8.19691	-51.3994	14.7615	1.3929	1.47328	0.713478	1.42182	0.452549	0.264865	0.778957	0	0				7.21	13.637	17.3788	90	100.658	90	1679.25		CAQCAZ_clean
CARGEI_clean	occupancy	0	0												NA	NA					-9.0711	-9.14088	2.42489	0.620624		0.538861	0.661506	0.246876	0.0902798	0.26823	0	0												CARGEI_clean
CASTEW_clean		1272.93	728.777					0.308307	0.331442	0.152777	0.312016	0.103491	0.0442333	0.206547	1363.28	780.524					-8.18881	-50.4716	13.6927	1.38439	1.44525	0.664542	1.43	0.436854	0.258048	0.747821	0	0				7.203	13.43	17.5404	90	100.761	90	1666.95		CASTEW_clean
CASWIE_clean	occupancy	1799.95	1431.91					0.5419	0.445588	0.340436	0.824061	0.369791	0.537895	0.0896175	1476.88	1174.86					-24.868	-20.8835	-29.7002	2.46469	2.57513	2.20453	2.35944	1.77048	1.81605	1.69452	0	0				15.269	15.2684	10.336	90	90	119.999	2086.85		CASWIE_clean
CATART03_clean		0	0					0.526609	0.590834	1.08646	0.40846	0.152195	0.0361356	0.422999	0	0																				9.22	9.623	10.565	90	90	90	937.37		CATART03_clean
CAVMIW_clean	metalvsorganic	0	0					0.324422	0.256914	0.242871	0.434517	0.218858	0.214933	0.222457	0	0					-3.3224	-3.22526	-4.06781	0.495157	0.410446	0.350549	0.645387	0.276182	0.308028	0.24699	0	0				9.209	14.712	12.5175	90	109.008	90	1603.43		CAVMIW_clean
CAVMIX_clean		1357.89	1440.02					0.275476	0.2638	0.195479	0.279627	0.0993908	0.104745	0.0599455	1310.74	1390.03					-1.07242	-0.498362	-0.500729	0.268137	0.2665	0.147782	0.272657	0.100953	0.10678	0.0580241	1280.76	1330.46				22.286	19.845	34.2899	90	90.9675	90	15163.1		CAVMIX_clean
CAVMOD_clean		1210.35	1261.5					0.156365	0.199153	0.433737	0.145237	0.071149	0.071232	0.0704243	1187.2	1237.36					-0.36919	-1.80207	-0.492989	0.166879	0.202966	0.445483	0.156236	0.0749006	0.0751846	0.0724231	1175.69	1192.58				14.058	23.001	31.2377	90.8804	90	90	10099.5		CAVMOD_clean
CAVNOE_clean		616.373	356.097					0.219716	0.0984254	8.88178e-16	0.261024	0.0498536	0.0518103	0.0420266	564.297	326.011					0.958477	-1.15784	-0.305146	0.221046	0.0955178	0	0.263481	0.0473361	0.0489346	0.0409424	563.723	324.002				18.279	7.33	11.601	90	90	90	1554.36		CAVNOE_clean
CAVPEW_manual		1897.67	4712.49					0.0518219	0.101193	0.0215016	0.0474229	0.0249042	0.0152267	0.103204	1899.99	4718.09					-1.14168	-1.14204	-1.14168	0.0420272	0.0944169	0.0137598	0.0372564	0.0209002	0.0122893	0.0905706	1913.37	4590.56				27.652	27.652	27.652	90	90	90	21143.6		CAVPEW_manual
CAVPIA_manual		1931.27	4640.83					0.0786904	0.191588	0.0689885	0.0670617	0.0302623	0.0129699	0.170174	1941.18	4664.65					1.07508	1.07399	1.08201	0.0895792	0.19905	0.068165	0.0786195	0.0397648	0.0226621	0.178141	1926.78	4781.25				27.449	27.449	27.449	90	90	90	20681.4		CAVPIA_manual
CAVPUM_manual		1911.89	4692.25					0.0997196	0.243373	0.205448	0.081816	0.0337387	0.0152164	0.198587	1915.25	4700.46					-0.0509354	-0.0509354	-0.0505742	0.099009	0.242307	0.205355	0.0811265	0.0334409	0.0150089	0.197486	1915.92	4694.98				27.682	27.682	27.682	90	90	90	21212.5		CAVPUM_manual
CAVRAU_clean		1690.98	1701.03					0.0961547	0.0695805	0.0569738	0.103278	0.0521824	0.0574243	0.0345155	1678.12	1688.1					-0.0328863	0.198231	-0.255841	0.099231	0.0745924	0.0536856	0.106442	0.0514829	0.0576597	0.0306649	1676.75	1685.18				15.508	19.22	25.211	90	90	90	7514.49		CAVRAU_clean
CAVREY_clean		1781.75	1735.5					0.138231	0.0859454	0.0658746	0.151415	0.0508247	0.0569821	0.0298437	1747.3	1701.93					0.224575	-0.0670583	-0.433511	0.138144	0.0854362	0.0634587	0.151545	0.0498664	0.05656	0.0270585	1743.93	1693.95				15.585	19.237	25.305	90	90	90	7586.66		CAVREY_clean
CAVSUP_clean		888.737	644.787			collapse		5.9115	5.91847	3.91207	6.00048	4.20001	4.56677	2.9622	701.891	509.238																				5.849	13.3447	18.782	90	90	97.713	1452.73		CAVSUP_clean
CAVTAW_clean		0	0			collapse		5.99311	6.53084	4.03422	5.9355	3.67859	3.61725	3.95459	824.685	533.342																				5.82	12.5037	18.187	90	90	101.922	1294.95		CAVTAW_clean
CAVVUS_clean		1425.84	1288.2					0.314099	0.337732	0.320968	0.306299	0.0572873	0.0537836	0.0721781	1388.79	1254.8					2.6898	-0.417932	-0.726329	0.345073	0.370191	0.327057	0.33873	0.0613026	0.0576697	0.0767424	1405.44	1287.3				10.767	16.462	17.9123	90	91.0972	90	3174.31		CAVVUS_clean
CAWDOU01_charged		0	0					0.408627	0.0955731	0.549313	0.4112	0.0990216	0.0893839	0.237804	0	0					8.29702	-4.71987	-5.10455	0.374483	0.0515605	0.520088	0.37713	0.131943	0.123685	0.250855	0	0				13.905	16.403	16.403	90	90	90	3741.26		CAWDOU01_charged
CAWDOU02_clean		1419.17	1567.77					0.438063		0.274562	0.441333	0.06664	0.0579179	0.18875	1176.46	1299.76					4.87644	0.295093	0.295093	0.14219		0.0843737	0.143346	0.0682172	0.0636953	0.131525	1441.77	1680.29				13.908	16.436	16.436	90	90	90	3757.14		CAWDOU02_clean
CAWDOU_charged		780.655	698.759					0.935406	1.69983	1.32056	0.915238	0.067301	0.057908	0.181895	0	0					8.60501	-0.188198	-5.2538	0.284621	0.16396	0.346207	0.285657	0.0843901	0.0731807	0.221145	864.214	794.48				13.733	16.419	16.598	90	90	90	3742.55		CAWDOU_charged
CAWGAJ_clean	Z>86	0	0												NA	NA															NA	NA												CAWGAJ_clean
CAWVIH_SL		701.524	565.43					0.074324	0.0478545	0.0665152	0.0774148	0.0532076	0.0568294	0.0188006	653.986	527.15					-0.170994	-0.90414	-0.259723	0.0826377	0.0620324	0.078269	0.0849912	0.0564796	0.0600083	0.0229566	640.952	509.735				11.989	18.637	17.981	90	90	90	4017.66		CAWVIH_SL
CAWZUX_clean		0	0																		-1.13106	-2.1621	0.311706	0.360532	0.703858	0.687172	0.290692	0.117563	0.0809158	0.218345	0	0												CAWZUX_clean
CAXPIC_clean		0	0					0.342241	0.358999	0.279364	0.342901	0.0690488	0.0459124	0.136916	0	0					-6.59628	-7.5478	3.74833	0.3983	0.394178	0.354012	0.402406	0.09298	0.0857506	0.114186	0	0				9.202	11.0885	11.9922	108.578	91.4	104.712	1114.42		CAXPIC_clean
CAXSUR_SL		2018.96	3263.16					0.717302	0.164055	0.12561	0.882283	0.199771	0.244158	0.0639667	1870.5	3023.27					0.77368	0.785753	0.972087	0.7272	0.229795	0.189181	0.875885	0.20583	0.251182	0.0670779	1877.56	3127.33				19.052	19.052	19.0517	75.0373	75.0372	75.0374	6317.01		CAXSUR_SL
CAXTAY_clean		1844.24	2546.53																		0.603172	0.603646	4.47427	0.500498	0.677181	0.229131	0.427938	0.286579	0.132516	0.46265	1802.07	2631.1												CAXTAY_clean
CAXTEC_clean		1731.97	2068.88																		13.1078	13.1068	17.6939	0.874175	0.757601	0.467534	0.990567	0.484921	0.472762	0.501422	2040.76	3670.48												CAXTEC_clean
CAXVII_clean		1518.14	1350.68					0.254586	0.318683	0.212927	0.22446	0.111366	0.0559388	0.185269	1463.35	1301.87					-3.88701	-3.16398	-3.06752	0.27936	0.404406	0.162518	0.2277	0.0764849	0.0663574	0.0899881	1462.18	1170.85				6.894	15.2402	15.2406	62.2326	81.3278	98.6724	1355.22		CAXVII_clean
CAXVOO_clean		1508.94	1346.37					0.267767	0.338518	0.226162	0.233637	0.118982	0.0703026	0.183888	1468.35	1310.2					-4.22302	-3.39978	-3.34862	0.29757	0.46758	0.178254	0.219427	0.0821394	0.0828708	0.0811641	1468.83	1170.05				6.911	15.2451	15.2451	62.2419	81.3076	98.6924	1359.24		CAXVOO_clean
CAXVUU_clean		1505.37	1312.24					0.229861	0.303261	0.131717	0.205451	0.0852287	0.0648022	0.112464	1465.62	1277.54					-2.89067	-2.73993	-2.69048	0.286617	0.411753	0.239755	0.220908	0.080766	0.0652768	0.101418	1465.38	1171.32				6.821	15.1645	15.1644	62.2054	81.3756	98.6244	1327.84		CAXVUU_clean
CAXWAB_clean		1514.51	1322.64					0.208068	0.293683	0.129129	0.172487	0.0762099	0.0525491	0.107758	1465.13	1279.66					-3.1612	-2.82765	-2.7551	0.28239	0.430245	0.248146	0.200526	0.0699649	0.0523523	0.0934484	1468.38	1171.17				6.838	15.1613	15.1611	62.22	81.3546	98.6453	1330.48		CAXWAB_clean
CAXWEF_clean		1508.64	1318.16					0.207442	0.314499	0.144256	0.155845	0.0746149	0.0478817	0.110259	1465.83	1280.75					-3.29797	-2.91444	-2.82209	0.267934	0.454015	0.222371	0.165398	0.0685157	0.050832	0.0920939	1467.13	1166.57				6.843	15.1586	15.1592	62.224	81.3459	98.6545	1330.98		CAXWEF_clean
CAXWIJ_clean		1516.39	1326.67					0.228704	0.295293	0.144775	0.205537	0.077839	0.0515707	0.112864	1462.25	1279.31					-2.70113	-2.83224	-2.83554	0.248776	0.404053	0.165514	0.172262	0.0648722	0.0553224	0.0776052	1474.72	1184.67				6.854	15.1572	15.1576	62.2317	81.3297	98.6706	1332.74		CAXWIJ_clean
CAXXEG_clean	occupancy	994.338	819.608					0.397129	0.30354	0.218067	0.428816	0.0828752	0.0572803	0.152769	982.271	809.665					4.29196	-4.12971	-2.31424	0.354534	0.263135	0.195121	0.384466	0.0896663	0.0683988	0.147743	889.168	721.307				13.099	18.444	22.0508	90	103.202	90	5186.63		CAXXEG_clean
CAXZOS_clean		1324.81	1418.75					0.220248	0.246282	0.217756	0.217828	0.0847619	0.0759805	0.13745	1314.21	1407.44					-0.896484	-1.38271	-1.38271	0.207592	0.23662	0.194606	0.205136	0.0880409	0.0817142	0.126001	1250.14	1286.34				25.332	25.9204	25.9204	76.1855	60.7481	60.7481	12955.8		CAXZOS_clean
CAXZUY_clean	n= 1504	1278.24	1344.12												NA	NA					-0.095852	-0.095852	0.222577	0.201076	0.297109	0.195932	0.192052	0.0782133	0.0617799	0.176814	1252.8	1317.77												CAXZUY_clean
CAYCAI_clean	metalvsorganic	751.726	378.726					1.00077	0.908686	1.05996	1.04612	0.287465	0.103192	0.434884	933.661	470.392					-12.0152	-11.8992	-5.61867	0.472202	0.609237	0.521826	0.372096	0.242529	0.221488	0.259361	0	0				16.067	16.3131	20.8626	72.9195	72.7288	80.8824	4976.04		CAYCAI_clean
CAYCEL_charged		0	0					0.27789	0.115038	0.0493081	0.330031	0.0671572	0.0728802	0.0530002	0	0					0.329563	0.328172	0.586234	0.286627	0.123487	0.049336	0.339277	0.0657877	0.0710779	0.0527015	0	0				14.383	14.3827	19.992	90	90	119.998	3581.67		CAYCEL_charged
CAYDEN_clean		484.083	320.835					0.250444	0.157207	0.0738167	0.262711	0.0525316	0.0537335	0.0467627	507.133	336.121					-4.28541	3.34808	3.34808	0.158968	0.064201	0.0767514	0.167012	0.0608757	0.0646566	0.0427275	566.239	383.658				7.907	12.3	12.3	90	90	90	1196.25		CAYDEN_clean
CAYDIR_clean		494.083	330.219					0.250927	0.154196	0.0671886	0.263676	0.0524578	0.0539769	0.0451665	523.533	349.879					-2.19247	2.08903	2.08903	0.209569	0.115298	0.0475371	0.221219	0.0548339	0.0575149	0.0419653	563.039	383.593				7.902	12.355	12.355	90	90	90	1206.21		CAYDIR_clean
CAYDUD_clean		534.609	359.523					0.242964	0.140497	0.072442	0.255372	0.0532957	0.0567186	0.0368657	555.239	373.389					2.03359	2.03359	-3.03708	0.194202	0.0993843	0.0698547	0.204164	0.057829	0.0626453	0.0347109	588.414	399.453				12.392	12.392	7.904	90	90	90	1213.75		CAYDUD_clean
CAYKEU_clean		975.355	587.824																																									CAYKEU_clean
CAYMIZ_clean		740.769	501.285					1.00015	1.05332	0.603656	1.0025	0.0778754	0.0440642	0.21481	0	0					-7.46764	-2.07395	0.332671	0.386312	0.460083	0.267512	0.376499	0.0893541	0.0888636	0.0913406	351.669	216.249				8.806	15.6031	19.2386	67.8523	76.7699	73.6092	2326.43		CAYMIZ_clean
CAYQAV_clean		1280.29	916.782					1.56497	1.74663	2.25697	1.48153	0.129089	0.0553349	0.438856	1189.23	851.562			collapse																	19.235	13.256	16.7559	90	123.91	90	3545.73		CAYQAV_clean
CAYQIE_clean	occupancy	2371.38	3406.73					1.19546	1.22591	1.20557	1.19034	0.162332	0.16911	0.0998253	2156.45	3097.87					-0.666055	-0.666055	2.69422	0.961055	0.863579	0.862402	0.980028	0.168246	0.169606	0.155706	2210.14	3217.36				18.842	18.842	21.921	90	90	90	7782.41		CAYQIE_clean
CAYQOK_clean	occupancy	2168.14	3219.19					0.675925	0.5523	0.479137	0.705031	0.246789	0.262682	0.109938	2142.55	3181.2					-2.65442	5.13982	-2.42657	0.561744	0.390074	0.284144	0.602346	0.235309	0.252386	0.0882541	2059.88	3054.34				24.495	27.929	22.13	90	90	90	15139.6		CAYQOK_clean
CAYQUQ_clean	occupancy	2047.69	2613.93					0.890369	0.685251	0.689078	0.923597	0.221044	0.229284	0.13498	1929.08	2462.58					-0.665829	-0.666355	-1.40708	0.890453	0.564218	0.539871	0.944291	0.237852	0.249327	0.118007	1984.27	2464.17				19.029	19.029	21.911	90	90	90	7934.04		CAYQUQ_clean
CAYSIE_clean		581.06	497.58					0.111538		0.000376697	0.113082	0.0507158	0.05343	0.0145265	578.006	494.945					-0.762854	-0.607073	-0.579408	0.107559		0.000722762	0.109043	0.0531594	0.0561402	0.0134165	545.248	457.871				9.312	19.1571	19.1577	62.5737	80.6756	99.3246	2882.02		CAYSIE_clean
CAYSOK_clean		621.607	537.738					0.138383		0.0174001	0.140063	0.055355	0.0569877	0.0335854	616.857	533.614					-0.659351	-1.49766	-1.46323	0.158982		0.146396	0.159157	0.0684582	0.065761	0.104422	468.016	390.057				9.341	19.1696	19.17	62.5848	80.6514	99.3488	2894.28		CAYSOK_clean
CAYSOL_clean	metalvsorganic	0	0					0.530416	0.415947	0.367131	0.756548	0.37587	0.445738	0.317646	0	0					9.14057	-7.01348	-29.4282	0.984397	1.06533	0.288111	1.09509	0.68818	0.732269	0.651439	0	0				14.754	23.596	9.273	90	90	90	3228.26		CAYSOL_clean
CAYYEG_clean		620.912	554.631					0.202204		0.00299389	0.20497	0.0565721	0.0527154	0.107994	671.927	600.234					-0.907006	-3.11271	-3.0198	0.178647		0.148203	0.17907	0.0753288	0.0740642	0.0921908	430.677	357.65				9.331	19.4818	19.4815	62.4978	80.8141	99.1858	2988.8		CAYYEG_clean
CAZFOA_clean		0	0					0.377594	0.14229	0.000210344	0.406102	0.0608126	0.0515783	0.142997	0	0					-4.00765	-2.3647	-1.75141	0.257969	0.174937	0.000770006	0.271292	0.0930013	0.0882047	0.135691	0	0				10.355	10.5174	12.3899	70.6451	89.4497	63.8516	1127.87		CAZFOA_clean
CAZGIT_clean		180.39	103.095					0.511544	1.05106	0.794478	0.443007	0.150018	0.0662467	0.398231	166.77	95.31					-7.30233	3.42742	2.67701	0.79082	1.89362	1.30458	0.656106	0.178232	0.104512	0.396661	227.776	129.511				9.588	21.844	21.8452	90	98.784	90	4521.6		CAZGIT_clean
CAZGOZ_clean		0	0					0.0796372		0	0.081112	0.0549295	0.0588569	0.0156561	0	0					0.0655954	0.0655954	0.0655954	0.0772761		0	0.0787072	0.0542555	0.0583232	0.0135793	0	0				19.666	19.666	19.666	90	90	90	7605.86		CAZGOZ_clean
CAZNEY_clean		1938.54	2329.81					1.06578	0.957576	0.511124	1.0957	0.0781145	0.0610209	0.202044	1980.8	2380.58																				10.938	13.5196	34.3259	99.0624	90	113.861	4572.8		CAZNEY_clean
CAZNOI_charged		2062.47	2985.6					0.193707	0.302991	0.288785	0.181163	0.0832261	0.0681546	0.213009	2018.18	2921.51					-0.88042	-0.553049	-1.48309	0.19861	0.291608	0.295149	0.187591	0.0917634	0.078022	0.210092	1989.04	2787.24				15.061	17.0691	28.353	90	90	100.652	7163.32		CAZNOI_charged
CAZNUO_charged		1981.1	2852.64					0.204064	0.244623	0.131071	0.20178	0.0752503	0.0666559	0.149258	1944.97	2800.74					-0.84317	-1.7976	-1.7988	0.191068	0.221425	0.098875	0.190194	0.0853366	0.0798325	0.132733	1875.78	2591.85				14.825	16.6723	16.6727	118.833	96.3188	96.3189	3524.59		CAZNUO_charged
CDLGLU01_clean		0	0					0.529714	0.410686	0.466102	0.571232	0.0904573	0.0686309	0.148661	0	0					-12.6905	-2.7713	-27.4123	1.05387	0.741433	1.30521	1.13067	0.399253	0.305962	0.64803	0	0				7.256	10.764	11.575	90	90	90	904.049		CDLGLU01_clean
CDLGLU02_SL		0	0					0.51058	0.381308	0.40828	0.558225	0.112415	0.0519531	0.250615	0	0					-9.86657	-2.14032	-26.981	1.00398	0.668627	0.921575	1.11351	0.347135	0.189666	0.707063	0	0				7.247	10.718	11.545	90	90	90	896.739		CDLGLU02_SL
CDLGLU10_clean		0	0					0.551722	0.42814	0.505803	0.593279	0.0644865	0.030767	0.154405	0	0					-9.71301	-2.61353	-27.7974	0.935962	0.686108	0.849291	1.01951	0.316801	0.24915	0.497202	0	0				7.286	10.79	11.61	90	90	90	912.731		CDLGLU10_clean
CDLGLU11_clean		0	0					0.55908	0.423103	0.508676	0.604796	0.0551918	0.0164568	0.158485	0	0					-12.6581	-3.21687	-27.4572	1.03074	0.738318	1.28211	1.10138	0.355608	0.246164	0.64746	0	0				7.286	10.79	11.61	90	90	90	912.731		CDLGLU11_clean
CDLGLU12_clean		0	0					0.51144	0.405519	0.453372	0.548498	0.0831531	0.0582385	0.149592	0	0					-12.9422	-2.94893	-27.3255	1.04885	0.738914	1.30286	1.12468	0.391641	0.297083	0.643796	0	0				7.266	10.777	11.586	90	90	90	907.25		CDLGLU12_clean
CEBDOD_clean		700.684	292.236																																									CEBDOD_clean
CECCET_clean		0	0																collapse																									CECCET_clean
CECVAI_clean		2493.28	3239.49					0.302252	0.255182	0.296726	0.305683	0.0683212	0.0505826	0.135334	2347.89	3050.62					0.807615	0.807615	0.807168	0.344594	0.390563	0.342215	0.341752	0.0640795	0.0489252	0.121329	2317.06	3084.05				22.387	22.387	22.387	90	90	90	11219.9		CECVAI_clean
CECVIQ_clean		0	0					0.73723	0.740327	0.738155	0.735457	0.0619542	0.0248714	0.124995	0	0																				6.754	11.937	13.4563	90	100.382	90	1067.12		CECVIQ_clean
CECVOW_clean		0	0					0.782294	0.784868	0.782816	0.780843	0.0689458	0.0321899	0.138374	0	0																				6.751	11.916	13.4571	90	100.425	90	1064.69		CECVOW_clean
CEDFIC_clean		1634.27	1345.95					0.679714	0.754798	0.573737	0.663308	0.0643844	0.029479	0.17526	1817.29	1496.73					-1.49151	-1.49443	-3.05326	0.340871	0.39929	0.327363	0.324824	0.0823918	0.0651175	0.137263	1570.8	1198.01				13.691	13.6906	16.3173	67.0233	67.0217	75.6938	2576.17		CEDFIC_clean
CEDFOI_clean	occupancy	1478.76	1198.4					0.464779	0.471849	0.34623	0.46832	0.0754338	0.0509371	0.156129	1353.92	1097.22					-8.12061	-2.5931	-1.10918	0.402918	0.485003	0.236839	0.387735	0.103823	0.101836	0.11037	0	0				24.943	16.941	25.2887	90	105.208	90	10311.8		CEDFOI_clean
CEDFUO_clean	occupancy	1332.59	1008.67					1.03048	1.18229	0.800717	1.00055	0.119353	0.089066	0.231985	1087.28	823.023					-7.55451	-14.4372	-0.294095	0.948415	0.850828	0.438553	0.996564	0.233202	0.23951	0.209743	253.85	156.374				14.324	15.3171	25.4683	87.9932	85.1506	63.4182	4979.24		CEDFUO_clean
CEFDAU_clean		0	0					1.54015	2.0832	2.11211	1.38769	0.28414	0.2476	0.475973	0	0					0.814719	-18.9363	-26.7808	2.72196	3.35153	3.62114	2.5321	0.536685	0.463174	0.922618	0	0				14.115	8.851	13.5701	90	111.761	90	1574.53		CEFDAU_clean
CEFLEF_clean		0	0					0.0767509	0.12565	0.000363525	0.0647564	0.0487297	0.0419604	0.0690375	0	0					-2.14375	-2.14898	-9.8783	0.210557	0.206762	0.00362014	0.227615	0.100436	0.087841	0.138222	0	0				15.277	15.2765	15.776	90	90	119.999	3188.55		CEFLEF_clean
CEGDUO_clean		477.387	248.857					0.41434		0.351064	0.420092	0.0646877	0.0562836	0.0983042	0	0					-2.93748	2.94046	-7.41239	0.516295		0.271355	0.538562	0.100867	0.0944425	0.126567	0	0				10.431	19.623	12.787	90	90	90	2617.34		CEGDUO_clean
CEGFAW_clean		0	0					0.383106		0.366154	0.384647	0.0661885	0.057487	0.100995	0	0					-3.60366	-10.7304	-0.12116	0.655563		0.64614	0.65642	0.143136	0.12967	0.196997	0	0				11.114	12.6836	19.726	90	90	101.834	2721.58		CEGFAW_clean
CEGWER_clean		449.542	307.738					0.497906	0.409172	0.764601	0.506333	0.0952849	0.0746336	0.206802	0	0					3.52024	-0.130406	-29.7507	0.965724	1.09648	0.771671	0.943831	0.28258	0.277989	0.307373	0	0				7.26	10.352	18.6915	90	94.0865	90	1401.2		CEGWER_clean
CEHLAD_clean		2010.12	2354.81					0.30081	0.341517	0.517162	0.256936	0.0999358	0.0373856	0.266736	1971.81	2309.97					-0.00730305	-0.00730305	1.14539	0.308625	0.341406	0.535282	0.267003	0.101927	0.0377971	0.272938	1975.84	2340.82				13.693	13.693	50.664	90	90	90	9499.41		CEHLAD_clean
CEHRIS_clean		0	0					0.070743		0.000274912	0.0742664	0.0625103	0.072088	0.0146219	0	0					5.76464	5.77184	-43.5685	0.48824		0.0011717	0.512594	0.24699	0.28805	0.0416931	0	0				9.72	9.72	16.576	90	90	90	1566.07		CEHRIS_clean
CEHROY_clean		0	0					0.075346		0.000267009	0.0790999	0.0651243	0.0744944	0.0182736	0	0					5.50163	5.50163	0.673583	0.0647207		0.000320033	0.0679407	0.0710802	0.075919	0.0468861	0	0				9.715	9.715	8.202	90	90	90	774.115		CEHROY_clean
CEHTEP_clean		0	0					0.563586		0.515853	0.581486	0.129207	0.0560802	0.158457	0	0					4.20374	-41.0477	7.56474	1.2684		0.724149	1.4725	0.359839	0.136684	0.449101	0	0				11.43	8.855	15.5999	90	114.811	90	1433.17		CEHTEP_clean
CEHWIX_clean		0	0					0.583687	0.581385	0.641197	0.578877	0.0938853	0.0461211	0.208519	0	0					-31.4986	-10.5847	6.75893	1.16243	1.49831	0.733305	1.14037	0.255845	0.221908	0.337294	0	0				7.865	10.545	11.2	90	90	90	928.888		CEHWIX_clean
CEHWOD_clean		0	0					0.638863	0.704027	0.440519	0.645046	0.0674086	0.0477784	0.114521	0	0					-19.456	-2.24459	-0.765832	0.883324	1.05424	0.48776	0.888208	0.114079	0.0906552	0.170296	0	0				7.19	10.63	11.543	90	90	90	882.228		CEHWOD_clean
CEJBEA_clean		649.352	412.244					0.122225	0.0827773	0.097373	0.128989	0.0579819	0.0556153	0.0678013	627.016	398.053					-1.28233	-1.43312	-1.06231	0.152024	0.103393	0.124145	0.160291	0.0669949	0.0645924	0.0769638	596.772	366.33				10.286	19.1609	19.7866	77.519	76.7206	81.0194	3682.43		CEJBEA_clean
CEJCAW_clean		1053.45	890.076					0.721408	0.260199	0.238244	0.823441	0.0596653	0.0530348	0.0940231	1162.14	981.911					2.08595	-4.95975	-5.76371	0.779704	0.401615	0.20143	0.872838	0.0997685	0.0951237	0.123837	887.914	679.544				11.156	13.0425	14.1351	89.7589	87.1817	85.0076	2046.41		CEJCAW_clean
CEJVET_clean		0	0					0.714519	0.748196	0.728172	0.608026	0.211101	0.0360721	0.325406	0	0			collapse																	16.673	9.586	22.5177	90	103.957	90	3492.69		CEJVET_clean
CEJZAU_clean		1237.73	1190.32					0.325987	0.316498	0.227104	0.329342	0.0706881	0.0574552	0.158356	1153.25	1109.09					-1.53973	-1.53602	-0.461412	0.233186	0.251071	0.14758	0.234136	0.0784516	0.0697723	0.135952	1119.9	1038.78				16.165	16.1657	29.4962	74.3154	74.3155	63.7852	6555.2		CEJZAU_clean
CEKHIL_clean		2612.51	4257.77					0.63033	0.490849	0.581372	0.660674	0.0705161	0.050745	0.160385	2592.27	4224.72					-3.39687	-1.66379	-2.47592	0.27274	0.294649	0.156816	0.274154	0.0866539	0.070799	0.158721	2534.07	3829.79				10.152	17.953	18.0617	90	94.6206	90	3281.21		CEKHIL_clean
CEKNIQ_clean	occupancy	1673.78	3715.93												NA	NA					0.17005	0.17005	5.23581	0.490468	0.25155	0.20441	0.553042	0.322906	0.36613	0.088992	1757.84	4120.87												CEKNIQ_clean
CEKROB_clean		0	0					0.189763	0.191477	0.300699	0.18615	0.062531	0.0559403	0.0969492	328.952	273.215					-1.58578	-1.58701	-14.9986	0.576009	0.721246	0.518338	0.571669	0.143416	0.13974	0.162617	0	0				16.295	16.2948	19.367	90	90	119.998	4453.54		CEKROB_clean
CEKRUH_clean		0	0																collapse																									CEKRUH_clean
CELKEL_clean		0	0					0.21361	0.215948	0.280581	0.211496	0.0673566	0.062791	0.102055	0	0					-1.42321	-1.50146	1.53637	0.241734	0.260021	0.280473	0.23906	0.0741991	0.0695994	0.109157	0	0				8.575	8.575	52.52	90	90	90	3861.83		CELKEL_clean
CELZEA_clean		863.45	529.774					1.00072	0.993197	1.29416	0.970616	0.134392	0.0587698	0.36126	1034.62	634.781					-10.0531	5.53273	-9.48341	0.967417	1.28848	1.14845	0.840281	0.197922	0.149637	0.342777	682.477	345.835				9.002	10.611	11.6946	116.982	109.226	90	925.021		CELZEA_clean
CELZIE_SL		0	0					0.250541	0.246707	0.0576999	0.263013	0.0443078	0.0418318	0.0529736	0	0					0.410095	0.407754	-0.971636	0.240019	0.21662	0.0581403	0.2576	0.0438436	0.0414377	0.0522642	0	0				21.361	21.361	10.57	90	90	90	4823.01		CELZIE_SL
CEMKOV_clean	occupancy	1534.22	1658.34					0.880519		0.19863	0.88793	0.597785	0.610794	0.155456	0	0					-32.9951	-2.82847	12.4142	2.41703		0.735702	2.4353	0.66301	0.671644	0.369467	0	0				18.567	9.934	30.764	90	90	90	5674.25		CEMKOV_clean
CEMYUQ_clean		1307.76	1072.21					0.79354		0.555871	0.804858	0.335384	0.370356	0.048615	0	0					-1.4056	-1.64802	2.67558	0.474763		0.165934	0.48947	0.314679	0.346792	0.0513558	0	0				7.141	7.141	20.489	90	90	90	1044.81		CEMYUQ_clean
CENJIQ_clean		953.96	746.679					1.54974	0.99789	0.918166	1.67039	0.0732327	0.0572803	0.117409	1154.99	903.99					-2.63549	-3.19756	-3.18448	1.06854	0.859931	1.02517	1.09691	0.178881	0.171196	0.200162	0	0				16.813	16.8123	16.8121	105.664	105.663	105.663	4093.42		CENJIQ_clean
CENKAJ_clean		942.002	738.053					1.61504	1.07011	0.988829	1.7344	0.0870633	0.0739775	0.123301	1153.25	903.612					0.518543	0.517349	0.517349	0.165426	0.22139	0.211897	0.154742	0.0817279	0.0724828	0.10733	873.717	694.554				16.759	16.7587	16.7587	105.19	105.193	105.193	4097.89		CENKAJ_clean
CENPUI_clean		848.957	849.039					0.50607	0.820613	0.636359	0.473528	0.0636458	0.0562201	0.133261	434.914	434.972					-0.114446	2.59023	-3.9806	0.341919	0.656083	0.504974	0.308644	0.075993	0.0699191	0.132936	786.965	764.09				8.432	12.8251	20.9245	73.4613	84.6912	78.3081	2122.71		CENPUI_clean
CEQBUV_charged		305.392	152.473					0.246162	0.174997	0.118442	0.286368	0.049057	0.0555718	0.0289696	323.645	161.579					-4.76999	-2.27974	-4.45503	0.375282	0.415654	0.279021	0.369926	0.0816906	0.0993971	0.0270958	204.367	90.0493				9.241	19.5284	19.528	62.4388	80.9253	99.0745	2975.99		CEQBUV_charged
CERMIV_clean		0	0					0.191629	0.139078	0.000271265	0.240421	0.0632564	0.0604996	0.0679822	0	0					-3.93945	-3.93104	-1.483	0.214825	0.129997	0.00389359	0.28542	0.0838783	0.0931544	0.0679764	0	0				9.4	9.40031	17.35	90	90	119.999	1327.71		CERMIV_clean
CESFIQ_clean		2251.45	3271.17					0.423915	0.0411502	0.0300281	0.490293	0.290943	0.316133	0.0250438	1947.54	2829.56					1.82602	1.82928	2.56684	0.413346	0.0766135	0.0877681	0.471018	0.279	0.300047	0.0568345	1998.33	3087.77				18.433	18.4337	52.364	90	90	120	15408.9		CESFIQ_clean
CESFOW_clean		2162.22	2878.63					0.333281	0.25879	0.0996861	0.359859	0.168551	0.183244	0.0640662	2036.88	2711.83					2.06874	2.13959	0.779902	0.274924	0.130043	0.094754	0.312909	0.158375	0.172731	0.0562857	2056.08	2870.49				18.63	18.6299	38.492	90	90	120	11569.8		CESFOW_clean
CESYEF01_clean		0	0					0.252885	0.298851	0.16365	0.25264	0.0466421	0.0530314	0.0281842	0	0					-3.30184	1.83192	-0.269409	0.0626973	0.0652418	0.0144626	0.0666196	0.0441486	0.0480392	0.0329091	0	0				3.652	12.151	15.0702	90	90.9809	90	668.649		CESYEF01_clean
CESYEF_clean		0	0					0.245097	0.255165	0.20807	0.246633	0.047268	0.0543704	0.02675	0	0					-4.96399	1.74326	-0.680491	0.0796089	0.0954826	0.0291653	0.0813086	0.0475941	0.0529572	0.0321004	0	0				3.693	12.178	15.239	90	90.1015	90	685.348		CESYEF_clean
CETFOX_clean		1207.38	887.04			collapse		2.5881	3.22468	3.50333	2.36264	0.59886	0.085951	1.78788	823.603	605.065																				7.768	14.3435	16.1249	92.9788	95.6053	99.5917	1758.79		CETFOX_clean
CETFUD_clean		842.198	589.631			collapse		3.31618	2.8453	0.736986	3.49633	1.39625	1.59897	0.760446	2139.86	1498.31					-10.5371	-18.7625	-0.912204	0.370757	0.486982	0.7549	0.334708	0.249633	0.238432	0.284764	0	0				7.745	10.1939	12.1467	80.7539	80.2884	82.8206	928.245		CETFUD_clean
CETGOY_clean		1811.02	2922.87					0.240346	0.207191	0.183829	0.242396	0.0707816	0.0688152	0.0994905	1774.83	2864.39					2.31636	-0.504093	-0.505268	0.173404	0.18986	0.198646	0.172428	0.0671182	0.0659952	0.0835149	1793.45	2931.64				14.907	25.531	25.5303	120	90	90	8414.82		CETGOY_clean
CETHEQ_clean		1603.36	1506.02					0.342863	0.920133	0.446709	0.288563	0.0933208	0.0645732	0.158003	1798.66	1689.6					1.4336	1.47382	1.47112	0.260177	0.914139	0.475856	0.18777	0.0895	0.063708	0.147532	1765.5	1732.33				10.861	14.8325	14.8326	65.7542	75.8739	104.126	1946.09		CETHEQ_clean
CETJAN_clean_h		686.024	654.866					0.342527		0.089753	0.3463	0.0396552	0.0316573	0.130299	1026.77	980.138					0.721879	0.727083	0.823202	0.336508		0.0953626	0.340107	0.0425273	0.0336078	0.143615	1110.82	1084.64				13.451	13.451	25.498	90	90	90	4613.34		CETJAN_clean_h
CETNUL_clean		0	0					0.125517		0.17046	0.12454	0.056178	0.0560218	0.0574791	0	0					-8.15508	-8.17945	13.4536	0.81584		0.498007	0.82275	0.0906922	0.0979941	0.0298432	0	0				20.108	20.108	20.234	90	90	120	7085.17		CETNUL_clean
CETPIB02_clean		0	0					0.0679353		0.000152066	0.0713245	0.0583944	0.0669771	0.0154807	0	0					6.3331	6.3331	-33.6839	0.656861		0.563583	0.661525	0.248288	0.288746	0.0459974	0	0				9.687	9.687	6.6	90	90	90	619.331		CETPIB02_clean
CETPIB_clean		0	0					0.0780446		0.000161463	0.0819387	0.0657507	0.0752624	0.0181919	0	0					6.30334	6.30334	-33.8776	0.492035		0.244629	0.504406	0.257351	0.299079	0.0487098	0	0				9.69	9.69	6.619	90	90	90	621.498		CETPIB_clean
CETVAA_clean		0	0					0.167603		0.132517	0.16816	0.0565582	0.0528928	0.104942	0	0					-2.15016	-2.17058	0.417501	0.167523		0.172981	0.167436	0.0632088	0.0607884	0.0951584	0	0				11.753	11.7525	11.8325	91.7812	91.7822	105.188	1575.23		CETVAA_clean
CEXHET_clean		0	0					0.0783215		0.0271799	0.0795843	0.0506578	0.0542789	0.015654	0	0					-0.152533	-0.270483	-0.628502	0.0855869		0.0269958	0.0870336	0.0524173	0.0565043	0.0129095	0	0				14.882	31.2036	36.961	113.689	99.1303	95.7976	15258.4		CEXHET_clean
CEXHOD_clean		1309.99	1325.29					0.098776		0.0353403	0.100342	0.0532221	0.0562492	0.0239604	1200.18	1214.24					-0.124813	0.0590376	0.339668	0.10597		0.0371341	0.10767	0.052817	0.0558204	0.0237842	1253.85	1271.95				33.41	26.932	12.3654	90	91.5339	90	11122.4		CEXHOD_clean
CEXJOF_clean	occupancy	1208.87	1184.15												NA	NA		manually	38		6.01845	-33.2993	-0.904447	3.24111		3.15102	3.24277	0.400548	0.412757	0.23369	NA	NA												CEXJOF_clean
CEXSEE_charged		1069.94	975.343					0.138012		0.178463	0.136585	0.0626318	0.0630319	0.0599539	0	0					-1.76929	0.101434	0.300225	0.142757		0.173878	0.141659	0.0648356	0.0651126	0.0629819	0	0				12.327	26.914	33.375	90	90	90	11072.8		CEXSEE_charged
CEYPUT01_clean		655.858	533.976					0.334704	0.307268	0.161486	0.347566	0.07873	0.0580216	0.146032	707.939	576.386					0.369678	-2.003	-4.8236	0.359341	0.320648	0.141916	0.376259	0.0864723	0.0710703	0.136529	279.435	212.57				6.208	12.681	10.4143	90	91.2104	90	819.669		CEYPUT01_clean
CEYPUT_clean		698.332	578.719					0.326262	0.301171	0.163237	0.338234	0.0813548	0.0596794	0.1518	712.899	590.763					-1.16109	-3.97735	-2.09024	0.271893	0.262377	0.152978	0.279028	0.0885124	0.0765825	0.127284	523.582	402.669				6.307	10.4914	12.611	90	90	91.2289	834.269		CEYPUT_clean
CEYWOU_clean	occupancy	768.766	505.218					0.522925	0.317828	0.263805	0.559259	0.393308	0.42348	0.145229	0	0					-4.02746	-1.27735	10.6339	0.588635	0.487076	0.623909	0.602637	0.448271	0.479693	0.189918	0	0				9.92	10.4904	13.4313	105.687	101.88	94.4339	1303.66		CEYWOU_clean
CEYYIQ_clean	Z>86	1265.25	465.829												NA	NA															NA	NA												CEYYIQ_clean
CEZFIY_clean		328.731	276.262					0.0572513	0.0691304	0.098109	0.0562417	0.0428248	0.0415814	0.0648936	0	0					-0.649057	-0.818442	-0.454276	0.0761464	0.0839646	0.103243	0.0754787	0.0462426	0.0456362	0.0570072	0	0				14.174	25.915	20.604	90	90	90	7568.25		CEZFIY_clean
CEZMUR_charged	Z>86	0	0												NA	NA															NA	NA												CEZMUR_charged
CEZNAY_clean	Z>86	0	0												NA	NA															NA	NA												CEZNAY_clean
CICPAH_clean		0	0					1.5924		1.34519	1.63949	0.300991	0.0539185	0.65882	0	0					-38.9985	-1.07102	8.31383	1.6639		2.32562	1.53786	0.659444	0.363769	1.08766	0	0				18.071	20.289	21.3257	90	105.166	90	7546.59		CICPAH_clean
CICSOW01_clean		0	0					0.223891		0.0296177	0.228517	0.0629047	0.0449076	0.197883	0	0					-0.548546	-0.759737	2.12647	0.241406		0.00106996	0.247128	0.0657333	0.047663	0.20126	0	0				10.938	10.9384	34.555	90	90	119.999	3580.45		CICSOW01_clean
CICSOW02_clean		0	0					0.238634		0.00756888	0.244136	0.0641142	0.0441271	0.214017	0	0					-1.67259	-1.83119	0.331954	0.214382		0.00263215	0.219424	0.0703731	0.0571875	0.169266	0	0				10.971	10.9706	35.517	90	90	119.998	3702.14		CICSOW02_clean
CICSOW_clean		0	0					0.303879		0.0509793	0.3099	0.0751562	0.0549841	0.226447	0	0					0.446056	-1.34905	6.24818	0.224843		0.00184971	0.230152	0.0790286	0.0606362	0.216972	0	0				11.03	11.0298	33.008	90	90	120.001	3477.67		CICSOW_clean
CICYIX_clean		0	0					0.236201	0.36785	0.261278	0.186049	0.0585675	0.0330774	0.154155	0	0					-5.36818	1.10487	-35.4595	0.801191	0.994438	1.45489	0.671491	0.203898	0.145307	0.423612	0	0				5.326	6.28887	8.10114	97.7307	105.053	110.438	237.812		CICYIX_clean
CIDKUX_clean		1526.93	1458.94					0.661645		0.371439	0.671319	0.0301934	0.0203182	0.114132	1498.36	1431.63					0.526957	-0.565441	0.228015	0.0790051		0.0887921	0.0786788	0.0185128	0.0181359	0.0217164	1510.09	1446.61				13.872	15.8988	17.6747	63.2707	78.8959	64.6422	3146.13		CIDKUX_clean
CIFDOM_clean		1443.5	1472.99					0.763554	0.554649	0.385113	0.831002	0.0864743	0.0493363	0.246632	1350.99	1378.61					-5.36675	-3.63625	-2.15326	0.575521	0.458066	0.295689	0.617169	0.125755	0.109934	0.193984	591.598	528.92				11.873	13.2339	18.474	90	90	109.511	2736.06		CIFDOM_clean
CIFDUS_clean		1350.11	1374.67					0.75944	0.434787	0.349359	0.854368	0.0868657	0.0493743	0.248547	1454.42	1480.9					-4.55897	-4.3627	-2.79889	0.497601	0.275143	0.190503	0.564097	0.118461	0.0972066	0.21012	732.794	663.734				11.667	11.6673	20.9871	95.8579	95.8552	104.276	2730.06		CIFDUS_clean
CIFGUV_clean	occupancy	0	0			collapse		1.30772	0.118025	0.0189913	1.50875	1.11782	1.21385	0.093428	0	0					-20.0911	31.4539	9.9449	2.1285	1.21521	0.698116	2.29508	1.18745	1.2432	0.592831	NA	NA				17.993	7.25	11.598	90	90	90	1512.95		CIFGUV_clean
CIFJAE_clean		1156.85	986.203					0.54661	0.622158	0.680188	0.510296	0.0855554	0.046236	0.190407	1169.03	996.616					-7.85815	-7.8156	2.44454	0.422791	0.692659	0.300445	0.34303	0.147298	0.0933317	0.291209	866.166	647.727				10.318	10.318	12.6523	100.756	100.755	104.727	1240.4		CIFJAE_clean
CIFLUA_clean		1778.11	2382.96					0.261252	0.360972	0.216498	0.24658	0.072713	0.0582798	0.152475	1755.58	2352.78					-2.1828	-2.91832	-8.11855	0.424232	0.490117	0.422889	0.413554	0.10508	0.0959756	0.155391	1645.57	1993.95				18.49	27.509	22.8599	90	123.229	90	9726.25		CIFLUA_clean
CIFMAH_clean		1938.45	2641.16					0.197492	0.314136	0.34135	0.174302	0.0777049	0.061923	0.172396	1909.2	2601.3					-2.5569	-3.25855	-1.70433	0.205291	0.296793	0.258079	0.189244	0.0968181	0.0858316	0.162737	1741.87	2199.15				17.443	25.094	21.991	90	90	90	9625.78		CIFMAH_clean
CIFMEL_clean		2594.02	3408.07					0.540962	0.68413	0.376585	0.500173	0.0811176	0.0594345	0.136874	2522.49	3314.23					-0.664765	-0.664765	-0.664765	0.487262	0.621931	0.233559	0.464139	0.07393	0.0615766	0.105696	2488.97	3203.56				14.652	14.652	14.652	90	90	90	3145.51		CIFMEL_clean
CIFMIP_clean		1649.88	1516.42					0.494545	0.525466	0.352949	0.496535	0.106143	0.0714392	0.185757	1666.74	1531.96					-1.82186	-2.46761	-2.66716	0.52107	0.506701	0.417825	0.538928	0.111634	0.07924	0.185949	1553.42	1345.9				16.988	16.9884	16.9884	63.2658	77.1611	109.143	3718.27		CIFMIP_clean
CIGDUT_clean		134.783	77.6287					1.07285	1.0742	1.28678	1.05695	0.0949678	0.0437975	0.205606	0	0					5.59195	-12.0227	1.2308	1.13884	1.31028	1.55307	1.02966	0.150625	0.112478	0.233103	0	0				12.793	14.6827	19.0771	107.115	105.537	93.5182	3261.06		CIGDUT_clean
CIGFAB_clean		0	0					0.879356	1.00996	1.1892	0.796587	0.0982802	0.0389939	0.219893	0	0					6.1928	-13.5161	1.45967	1.17806	1.35603	1.58466	1.06638	0.154903	0.109212	0.248629	0	0				12.807	14.5572	19.1275	106.659	105.622	93.6905	3251.18		CIGFAB_clean
CIGFEF_clean		0	0					0.445613	0.505515	0.674857	0.402009	0.144822	0.0744956	0.289178	0	0					2.66709	-9.21756	-13.7649	0.662126	0.81401	0.506633	0.60614	0.2671	0.286181	0.227935	0	0				10.063	13.0289	14.9226	79.663	70.2932	67.2807	1696.26		CIGFEF_clean
CIGXIA_manual	n= 2720	1302.51	1903.07												NA	NA															NA	NA												CIGXIA_manual
CIGYAU_clean		0	0					0.180655		0.191042	0.180052	0.066777	0.0590069	0.0961307	0	0					-0.243386	-0.0178464	0.263978	0.193818		0.193758	0.193821	0.0668181	0.058858	0.0968896	0	0				10.724	13.448	13.448	90	90	90	1939.42		CIGYAU_clean
CIJVOH01_clean		1957.1	1372.05					1.0107	0.93514	1.99856	0.820407	0.252736	0.0515789	0.579617	1920.34	1346.3					-47.7482	-7.9944	-28.7046	2.65848	2.71565	3.6448	2.36902	1.04744	0.689776	1.62865	0	0				8.415	9.813	21.028	90	90	90	1736.42		CIJVOH01_clean
CIJVOH_clean		1855.44	1285.66			collapse		2.29684	2.5222	3.16832	1.90996	0.59813	0.0534015	1.48332	0	0					-52.7852	-0.62389	-28.5396	2.76361	2.71776	3.255	2.67515	1.12589	0.730894	1.76775	0	0				8.365	9.795	20.946	90	90	90	1716.21		CIJVOH_clean
CIKCOQ_clean		0	0					0.172806	0.545442	0.0359475	0.108345	0.0484401	0.0490397	0.0462132	0	0					-7.52389	0.567791	-17.7062	0.43334	0.894164	0.0739596	0.362677	0.111529	0.117632	0.0888612	0	0				10.17	20.659	7.67243	90	104.261	90	1562.32		CIKCOQ_clean
CIKGUZ_clean	occupancy	0	0					0.489766		0.430872	0.490732	0.214408	0.218123	0.16536	0	0					-11.302	-1.06672	-12.2099	0.732886		0.201362	0.7416	0.350678	0.36264	0.19278	0	0				20.568	14.568	22.929	90	90	90	6870.32		CIKGUZ_clean
CILDAD_clean		0	0					0.189401	0.164009	0.259501	0.192024	0.0627394	0.0468163	0.0909462	0	0					-2.7932	-2.67086	-0.050964	0.225663	0.220573	0.190115	0.230322	0.081958	0.0734712	0.0969917	0	0				9.276	11.5501	17.2668	104.828	90	113.675	1626.76		CILDAD_clean
CIMFOV_clean	occupancy	0	0												NA	NA		manually	206		-6.20612	-4.62865	12.9257	1.80654		1.19529	1.82183	0.761927	0.765387	0.696175	NA	NA												CIMFOV_clean
CIMTAV_charged	n= 1520	843.833	758.859												NA	NA		manually	101		-3.25804	2.98189	11.4594	3.12892	3.06671	3.10669	3.1351	0.230311	0.205313	0.389509	NA	NA												CIMTAV_charged
CIMTEZ_charged	n= 1352	1137.45	1076.84												NA	NA					-1.18857	-3.43949	0.600043	0.596832	0.545029	0.415684	0.60705	0.11006	0.0919303	0.21343	NA	NA												CIMTEZ_charged
CIPCUB_clean		726.177	420.032																		-0.631755	1.67849	-5.27766	0.245432	0.317237	0.296378	0.23257	0.103559	0.0802604	0.196753	688.881	381.68												CIPCUB_clean
CIPLIX_clean		0	0					1.26984	1.22708	0.764155	1.31495	0.167174	0.140577	0.273563	1027.18	911.402					-39.7481	1.89015	0.731054	1.64438	1.88744	1.66103	1.57845	0.375035	0.263181	0.822452	0	0				15.425	12.184	16.059	90	90	90	3018.1		CIPLIX_clean
CIPREZ_charged		0	0					0.35682	0.317818	0.380746	0.364469	0.0830444	0.0730997	0.111635	0	0					-6.3229	-8.69407	-6.92492	0.745102	0.774311	0.819771	0.734894	0.179899	0.155717	0.249424	0	0				14.506	15.912	16.689	90	90	90	3852.15		CIPREZ_charged
CIPRID_charged		0	0					0.436119	0.47771	0.44862	0.426123	0.084807	0.070845	0.124948	0	0					-3.36026	-7.3607	-7.85564	0.751527	0.793958	0.75604	0.741727	0.162009	0.143376	0.215577	0	0				14.237	15.739	16.611	90	90	90	3722.13		CIPRID_charged
CIQQIE_clean	n= 1344	1210.55	1172.8												NA	NA		manually	219		-1.29459	-0.248644	-23.0994	1.18795	0.994433	0.888783	1.21059	0.223101	0.174055	0.529952	NA	NA												CIQQIE_clean
CIQYUX_clean		0	0					0.206582	0.245309	0.108551	0.201654	0.0812974	0.070124	0.098756	0	0					-0.732755	-1.22387	-1.88749	0.21382	0.251291	0.0962617	0.211756	0.0881489	0.0804499	0.100179	0	0				11.409	17.7063	17.7063	84.0411	71.2038	71.2038	3205.54		CIQYUX_clean
CIRTUU_clean	n= 1296	2316.59	3968.41					0.123845	0.160656	0.239894	0.111877	0.0476531	0.0442892	0.0685842	2309.36	3956.02					0.890667	0.890667	1.12523	0.100911	0.150833	0.180282	0.0882268	0.0474692	0.0440902	0.0684945	2285.09	4029.32				30.988	30.988	45.964	90	90	90	44137.2		CIRTUU_clean
CISLUN_clean		1697.87	1762.88					0.316884		0.239605	0.320396	0.0630925	0.0438048	0.149887	1662.37	1726.1					1.4361	-0.0373312	2.15789	0.240647		0.218113	0.241671	0.0652779	0.0470363	0.147365	1691.62	1812.07				12.952	14.733	20.0524	90	129.256	90	2962.91		CISLUN_clean
CISMEY01_clean		0	0					0.319788	0.358553	0.422615	0.305521	0.0633254	0.046938	0.116389	0	0					-6.2751	-4.84041	-4.35484	0.219779	0.172097	0.286608	0.22352	0.077178	0.0803633	0.0668635	0	0				9.153	9.4867	11.1532	90.9272	99.7459	105.173	919.338		CISMEY01_clean
CISMEY_clean		0	0					0.367102	0.335029	0.412688	0.369664	0.0763072	0.0485474	0.163552	0	0					-29.3476	-1.90592	-0.459036	4.72644	4.80328	4.76916	4.70905	0.179458	0.132519	0.326982	0	0				9.179	9.45986	11.1536	90.7244	100.251	105.267	917.59		CISMEY_clean
CISMIC_clean		0	0					0.536784	0.545651	0.400429	0.545242	0.0843706	0.046131	0.210561	0	0					-2.86575	-1.90817	-4.60601	0.267833	0.314597	0.348441	0.253203	0.0925816	0.0622708	0.192607	0	0				9.117	9.45153	10.9141	97.53	92.1109	103.248	905.36		CISMIC_clean
CISXEJ_clean		740.434	741.71					0.202562	0.290719	0.803431	0.194312	0.0592015	0.0565107	0.135216	745.959	747.238					-3.68941	-6.26575	-2.80465	0.683785	1.08794	1.17061	0.668345	0.107495	0.103278	0.226643	605.156	536.373				11.221	39.847	22.495	90	104.134	90	9753.55		CISXEJ_clean
CITXUZ_clean		0	0					0.254584	0.118972	0.0486538	0.284475	0.0638968	0.058177	0.0921947	0	0					-0.288363	-1.27761	-1.27641	0.301566	0.165944	0.0399555	0.334174	0.0832754	0.0779979	0.109385	0	0				14.669	16.6637	16.6641	60.6729	63.8893	63.8886	3054.89		CITXUZ_clean
CITZIP_manual		1224.55	856.118					0.301861	0.367088	0.268831	0.278321	0.0890206	0.0384381	0.164894	1204.89	842.393					-0.00554924	-3.24991	-4.40745	0.304159	0.373917	0.251053	0.281254	0.0665426	0.0252357	0.128503	1116.6	729.331				10.812	11.1357	11.1361	103.706	102.156	77.8434	1255.03		CITZIP_manual
CIVTEH_clean		818.091	771.144					0.329772	0.38896	0.416046	0.324781	0.052935	0.0463039	0.129193	701.799	661.532					-9.67615	0.257195	-5.08966	0.488143	0.440423	0.306272	0.494907	0.0938809	0.0894108	0.145287	0	0				12.234	13.9587	19.6062	83.8179	75.7745	64.0095	2917.27		CIVTEH_clean
CIWREG_clean		1557.58	1264.79																		-2.45876	0.289422	0.817698	0.414687		1.25949	0.382195	0.106318	0.0513761	0.46344	1409.9	1129.11												CIWREG_clean
CIWRIK_clean		1569.96	1274.88																		1.17211	-0.88884	1.53515	0.228672		1.17857	0.192137	0.103749	0.0487137	0.461481	1509.72	1248.17												CIWRIK_clean
CIWROQ_clean		1602.45	1323.88																		-2.26268	1.3397	1.02446	0.256853		1.19629	0.220721	0.105803	0.0522063	0.454181	1496.61	1237.19												CIWROQ_clean
CIWRUW_clean		1543.29	1249.96																		0.974684	1.40697	1.40979	0.119642		0.848933	0.0915929	0.0911918	0.04805	0.371613	1576.14	1325.58												CIWRUW_clean
CIWSAD_clean		1554.58	1272.42																		0.778176	1.166	1.36386	0.125371		0.890926	0.0959268	0.0932361	0.0481404	0.386358	1586.51	1341.98												CIWSAD_clean
CIWYUD_clean		1072.35	759.389					0.304729	0.356205	0.277805	0.288098	0.0881971	0.040769	0.169503	1162.59	823.335					-1.60519	-5.07226	-5.12796	0.254012	0.287698	0.230063	0.243954	0.110295	0.0891514	0.146541	980.699	611.135				11.139	11.2652	11.4142	76.3819	66.3708	78.9664	1267.72		CIWYUD_clean
CIWZEP_clean		442.564	380.238																		-6.18763	-5.41363	0.0927242	0.51024		0.377265	0.514332	0.128931	0.128253	0.132033	327.441	250.275												CIWZEP_clean
CIWZIT_clean		444.565	354.882					0.316817		0.159041	0.321647	0.0795426	0.0804309	0.0754561	463.69	370.155					-5.39267	-5.38984	-2.93443	0.652462		0.417924	0.659641	0.128999	0.130557	0.121831	360.709	250.756				13.967	26.246	29.8119	95.3101	90	90	10881.5		CIWZIT_clean
CIXBUH_clean		1560.75	1272.06																		1.05732	-1.03652	1.30441	0.241025		1.18587	0.204684	0.103926	0.049024	0.460793	1494.9	1234.4												CIXBUH_clean
CIXCAO_clean		1569.09	1301.11																		0.700548	1.09716	1.22873	0.122284		0.877674	0.0932309	0.0947677	0.0501672	0.384671	1601.36	1368.45												CIXCAO_clean
CIXCOC_clean	occupancy	158.882	66.2195					0.894711	0.476623	0.397025	1.25828	0.555345	0.745735	0.297758	0	0					-2.96546	-2.83006	-3.47819	0.751617	0.306114	0.183882	1.14615	0.509921	0.764134	0.165985	NA	NA				15.141	15.1403	9.331	90	90	119.999	1852.47		CIXCOC_clean
CIYZUG_clean		0	0					0.268692		0.0632013	0.271671	0.0718976	0.064332	0.160163	0	0					1.25043	-10.9534	2.04288	0.381033		0.0250728	0.386192	0.115448	0.105838	0.22756	0	0				17.314	5.363	23.9274	90	133.578	90	1609.54		CIYZUG_clean
CIZLEE_clean		0	0					0.224695	0.289274	0.300026	0.186256	0.100988	0.0352213	0.204081	0	0					-17.7207	1.06009	-19.2733	0.79081	1.00211	0.825653	0.695276	0.271888	0.223331	0.348005	0	0				6.595	9.16534	14.1955	85.8726	82.1656	74.7356	819.471		CIZLEE_clean
CIZMIJ_clean		1838.47	2365.86					0.640102		1.56878	0.611961	0.123851	0.0612728	0.906084	1387.81	1785.88					-0.836634	-0.0642921	0.64213	0.210585		1.32343	0.176863	0.119967	0.0604882	0.86345	1571.71	2031.23				7.548	10.8874	19.0465	79.9475	79.5702	73.078	1460.29		CIZMIJ_clean
CIZPOS_clean		1668.57	1672.28					0.66273	0.109931	0.132346	0.768175	0.372739	0.409923	0.042214	368.791	369.628					2.05248	2.0276	3.39715	0.633392	0.051298	0.0838106	0.744083	0.379426	0.41874	0.0299694	1063.41	1146.72				18.49	18.4902	38.727	90	90	120	11466.3		CIZPOS_clean
CIZTIP_clean	n= 1104	0	0												NA	NA					-3.72501	2.01917	-13.2313	0.744814		1.07302	0.729896	0.207231	0.157534	0.425898	0	0												CIZTIP_clean
COBWEV_clean		269.005	164.419				NUMBER OF ATOM								553.488	338.302				NUMBER OF ATOM											0	0				5.369	15.6372	20.0844	88.4851	82.3174	80.113	1646.24		COBWEV_clean
COCMAJ_clean		2391.94	2848.23					0.660102	0.662938	0.660252	0.659321	0.0512305	0.0409162	0.0770161	2466.28	2936.75					-0.563286	-5.08915	-4.04523	0.339005	0.473447	0.364151	0.299907	0.0678482	0.0677289	0.0681463	2399.06	2586.99				13.51	27.37	27.991	90	90	90	10350.2		COCMAJ_clean
COCMOY_clean		1971.63	3658.74					0.247615		0.233945	0.248293	0.0808586	0.0494823	0.224293	1957.31	3632.35					-3.49081	-3.49081	-2.61587	0.236819		0.22363	0.237473	0.10309	0.0761876	0.226072	1945.98	3275.44				18.827	18.827	25.464	90	90	90	9025.87		COCMOY_clean
COCMUE_clean	n= 1512	2282.58	3964.03												NA	NA															NA	NA												COCMUE_clean
COCNAL_clean		2285.89	3495.5					0.109698		0.229235	0.103721	0.0547936	0.0450805	0.106597	2245.34	3433.55					0.167391	0.167703	0.167079	0.104674		0.236743	0.0980701	0.0537423	0.0445044	0.103011	2246.58	3452.72				32.021	32.0211	32.0208	109.473	109.47	109.47	25274.6		COCNAL_clean
COCNEP_clean	n= 1512	2242.38	3644.92												NA	NA					0.244262	0.244539	0.244815	0.665527		0.631353	0.667235	0.0531606	0.0448134	0.0976789	NA	NA												COCNEP_clean
CODDAA_clean	metalvsorganic	0	0					0.415108	0.289642	0.449807	0.526695	0.179395	0.0907173	0.213881	0	0		manually	13		-43.3721	-42.6836	-35.9423	4.73558	4.7786	4.71954	4.69897	1.45677	0.979248	1.64248	0	0				11.112	11.1118	10.04	90	90	120.001	1073.59		CODDAA_clean
CODFEH_clean		0	0					0.464438	0.499937	0.337125	0.462806	0.103897	0.0542938	0.252706	0	0					-3.70095	-3.70095	-4.44158	0.291869	0.359259	0.119383	0.281084	0.128156	0.0965509	0.222973	0	0				7.954	7.954	13.189	90	90	90	834.417		CODFEH_clean
CODFUX_clean	metalvsorganic	0	0					0.279717	0.366309	0.0720091	0.141056	0.0473872	0.0149651	0.0798092	0	0					2415.11	2433.5	2722.84	6.45716	6.46428	6.45439	6.43146	1.51853	1.42023	1.61683	0.375863	4456.92				10.022	14.335	14.636	90	90	90	2102.69		CODFUX_clean
CODGAE_clean		0	0					0.107347	0.11789	0.0854994	0.0870261	0.050509	0.0366248	0.0643932	0	0					1.61427	1.61427	-3.80863	0.208882	0.230122	0.203842	0.128963	0.0504866	0.0405095	0.0604636	0	0				13.709	13.7084	15.436	90	90	119.999	2512.25		CODGAE_clean
CODJUC_clean	occupancy	0	0					0.888752	1.06894	0.346566	0.891489	0.474543	0.491064	0.340219	0	0					55.8391	-24.1565	42.9944	3.4684	2.67645	2.21304	3.56498	0.701513	0.648328	1.13393	NA	NA				13.393	9.903	23.7663	90	98.035	90	3121.2		CODJUC_clean
CODKOX_clean		0	0					0.216585	0.370883	0.0407379	0.185405	0.0679871	0.0544966	0.119109	0	0					-15.5098	7.96272	8.98855	0.726592	0.794272	0.542295	0.716611	0.126479	0.0960917	0.24163	0	0				8.869	12.07	16.6	90	90	109.339	1676.74		CODKOX_clean
CODMUF_clean	metalvsorganic	0	0					0.801697	0.672462	0.617641	1.06457	0.18807	0.242157	0.115954	0	0					-7.79237	-5.65339	-27.0411	2.3044	2.27217	2.32109	2.34648	0.483709	0.482168	0.485764	0	0				18.119	8.394	12.887	90	90	90	1960		CODMUF_clean
CODNAM_clean	metalvsorganic	959.236	586.614					0.784269	0.814228	0.603248	0.807215	0.142326	0.174665	0.0992065	695.385	425.246					-36.1928	-23.8272	-1.58701	2.00141	1.77003	2.14556	2.29441	0.834828	0.803536	0.87655	0	0				8.332	16.486	15.2673	90	91.6515	90	2096.27		CODNAM_clean
CODQOD_clean		0	0					0.231343	0.392191	0.0490135	0.198804	0.0719457	0.0549256	0.136443	0	0					-17.4069	12.1844	5.1907	0.723353	0.763015	0.415633	0.72439	0.134317	0.105045	0.245243	0	0				8.932	12.1603	16.844	90	90	109.04	1729.43		CODQOD_clean
CODQUJ_clean		0	0					0.225368	0.383339	0.0443977	0.193478	0.0714165	0.0545609	0.135291	0	0					-15.9974	7.86156	8.96176	0.745281	0.80929	0.552625	0.736474	0.130792	0.0971114	0.258423	0	0				8.917	12.1118	16.626	90	90	109.359	1694.1		CODQUJ_clean
CODROD_clean		414.06	219.231					0.398815	0.561326	0.0206114	0.31355	0.133375	0.0161771	0.237051	0	0																				9.143	9.14278	14.7726	100.122	100.121	115.604	1051.31		CODROD_clean
CODRUJ_clean		385.084	200.232					0.394101	0.527854	0.0573265	0.327566	0.134188	0.0258189	0.230053	0	0																				9.13	9.12999	14.7103	100.168	100.168	115.538	1044.03		CODRUJ_clean
CODSAR_clean		0	0					0.198437	0.343689	0.0352399	0.169004	0.0569971	0.0545318	0.0663394	0	0					-14.1995	8.0271	8.10932	0.674315	0.748259	0.508502	0.662185	0.110565	0.0910268	0.184602	0	0				8.752	12.0275	16.736	90	90	108.931	1666.42		CODSAR_clean
CODSOF_clean		0	0					0.172435	0.156611	0.144503	0.17428	0.0564766	0.0577246	0.0431652	0	0					-3.68595	0.317758	-0.839352	0.19373	0.145336	0.165193	0.197877	0.0696998	0.0713853	0.0517209	0	0				9.481	18.1268	18.693	61.881	83.9814	86.3499	2817.41		CODSOF_clean
CODSUL_clean		0	0					0.130468	0.228242	0.297135	0.120238	0.0667848	0.0619995	0.106434	484.4	380.781					-8.76769	-6.22378	-1.70424	2.10213	1.63722	1.15462	2.15379	0.196707	0.176579	0.363487	0	0				12.156	18.5896	21.0246	74.0503	75.9391	75.581	4345.85		CODSUL_clean
CODVAU_clean	occupancy	565.695	302.827			collapse		2.05913	1.9573	1.34696	2.07635	1.82014	1.87046	0.642423	0	0					-0.936792	25.8249	-5.12449	2.67196	2.62524	2.51335	2.67727	0.878946	0.871092	1.06272	NA	NA				7.151	24.899	28.6095	90	93.4066	90	5085		CODVAU_clean
COGKEP_clean		0	0					0.355773	0.389263	0.28489	0.304506	0.102658	0.0269413	0.163231	0	0																				13.539	13.5391	15.044	90	90	120.002	2388.15		COGKEP_clean
COGNAO_clean		1506.04	1326.05					0.10986	0.0661605	0.0844781	0.116794	0.0524743	0.0554971	0.0305589	1442.64	1270.24					0.0947271	0.0947271	0.0947271	0.108991	0.0660794	0.0836788	0.115816	0.0519574	0.0549543	0.0302298	1447.06	1277.74				22.908	22.908	22.908	90	90	90	12021.6		COGNAO_clean
COJGEO_clean		1792.38	1832.03					0.159998	0.138918	0.15808	0.163965	0.0535025	0.0536157	0.0530215	1691.11	1728.52					0.0402782	1.61706	-0.408389	0.152686	0.134391	0.133192	0.157134	0.0521653	0.0526944	0.0499166	1721.01	1780.79				9.459	41.254	18.4142	98.6454	90	90	7103.97		COJGEO_clean
COJHIT_clean		1626.51	2270.22					1.00681		1.25821	0.99538	0.0707168	0.065813	0.101366	1637.03	2284.92					-3.20232	-3.03705	2.14862	0.225616		0.368451	0.219124	0.0769369	0.0712847	0.112263	1611.69	2156.74				13.253	13.253	13.995	90	90	90	2458.11		COJHIT_clean
COJMIZ_clean	occupancy	1520.84	1505.09			collapse		0.947102	0.562378	0.87207	0.990722	1.1811	1.22938	0.746597	966.944	956.967					-0.0984323	-4.16439	5.72155	0.704631	0.211587	0.182134	0.772054	0.220951	0.23428	0.100991	NA	NA				13.817	21.785	20.1413	90	103.313	90	5899.68		COJMIZ_clean
COJMOF02_clean	occupancy	1571.02	1721.01					0.181321	0.111497	0.0952681	0.191911	0.104962	0.112217	0.0449448	1444.98	1582.94					8.10802	-54.9347	41.0336	7.52514	7.80748	7.80689	7.48424	0.495657	0.404971	1.24588	0	0				32.902	23.259	18.5664	90	122.059	90	12041.5		COJMOF02_clean
COKDAI_clean		1144.87	1065.41			collapse		0.499621		2.70529	0.447105	0.144125	0.0678759	1.85973	1045.32	972.782					25.6661	-46.0634	18.3111	4.70117		2.33955	4.7574	0.504296	0.489609	0.834751	0	0				7.648	30.755	11.216	90	90	90	2638.16		COKDAI_clean
COKFAK_clean		0	0					0.451142		0.000366629	0.455435	0.0777443	0.0685226	0.288921	0	0					2.05784	-5.28572	682.35	8.25157		8.75306	8.2468	0.273523	0.258775	0.611239	177.535	1259.37				8.78	14.8574	21.6212	72.2116	81.687	83.5734	2650.5		COKFAK_clean
COKJIX_clean		0	0					0.188523	0.19398	0.167521	0.187617	0.0571234	0.0497457	0.072801	0	0					-0.731071	-17.5963	-2.61629	1.08132	1.14949	1.23739	1.04799	0.197347	0.163499	0.269273	0	0				8.358	10.5281	17.4672	98.7418	97.0076	100.524	1475.75		COKJIX_clean
COKJOD_clean		0	0					0.185192	0.223437	0.388149	0.160419	0.0705129	0.0494946	0.111741	0	0																				8.391	10.5521	17.4633	98.9922	97.1116	100.423	1483.52		COKJOD_clean
COKMEW_clean		1439.52	1266.74					0.198674	0.25634	0.196914	0.164427	0.0780804	0.0330698	0.138094	1426.94	1255.73					-4.18246	-4.18285	-2.51562	0.278902	0.442304	0.206223	0.195396	0.0714111	0.058189	0.0890406	1425.84	1122.97				26.035	26.0348	6.851	90	90	119.999	4021.62		COKMEW_clean
COKMIA_clean		1442.03	1229.89					0.197677	0.311974	0.0597859	0.156678	0.0697817	0.0245294	0.130118	1424.39	1214.87					-1.97508	-1.97315	-6.25183	0.250379	0.384576	0.299233	0.16009	0.0886602	0.0484574	0.142264	1406.1	1080.32				25.898	25.8977	6.846	90	90	120	3976.44		COKMIA_clean
COKMOG_clean		1412.87	1067.22					0.14834	0.194481	0.1382	0.122682	0.0533161	0.0285252	0.0863706	1405.38	1061.47					2.70668	2.70668	0.784157	0.105474	0.148233	0.130689	0.0747755	0.0659483	0.0426747	0.0969798	1438.03	1154.81				25.858	25.8583	6.261	90	90	120	3625.51		COKMOG_clean
COKMUM_clean		1452.06	1351.39					0.535431	0.663347	0.995771	0.366614	0.190338	0.0401966	0.390526	1456.8	1355.79					-4.01425	-4.01805	-4.33007	0.178987	0.220274	0.20921	0.14817	0.0871209	0.0518282	0.134178	1427.92	1171.36				26.326	26.326	7.044	90	90	120	4227.85		COKMUM_clean
COKNAT_clean		1496.08	1218.32					0.201315	0.260636	0.259368	0.154112	0.0901472	0.0559715	0.135715	1497.97	1219.92					-1.14533	-1.14533	0.216809	0.244404	0.332234	0.264021	0.187782	0.089071	0.0507612	0.140151	1481.31	1181.38				25.914	25.9138	6.799	90	90	120	3954.04		COKNAT_clean
COKPEZ_clean		1474.08	1618.52					0.155687	0.190656	0.194185	0.127005	0.0634534	0.0295531	0.108654	1487.95	1633.8					0.0150737	0.0150737	-1.88297	0.143337	0.176262	0.154162	0.121418	0.0579823	0.0354269	0.0880562	1478.28	1593.06				25.873	25.873	6.87	90	90	119.999	3982.77		COKPEZ_clean
COKPID_clean		1457.02	1280.66					0.222732	0.270622	0.234492	0.191647	0.0904883	0.0279253	0.173906	1424.12	1251.81					-4.04023	-4.04061	-2.62087	0.296451	0.459536	0.203274	0.217236	0.0769905	0.0520022	0.110308	1425.08	1123.18				26.001	26.0011	6.861	90	90	119.999	4017.02		COKPID_clean
COKPOJ_clean		1441	1227.19					0.184961	0.279398	0.12673	0.139945	0.06618	0.0289217	0.115858	1426.74	1215.08					-1.89808	-1.89731	-6.27734	0.242989	0.364777	0.214027	0.17571	0.0858178	0.06282	0.116482	1406.02	1080.04				25.873	25.8735	6.849	90	90	120.001	3970.59		COKPOJ_clean
COKPUP_clean		1490.96	1209.73					0.247464	0.335844	0.313012	0.181327	0.117223	0.0552336	0.199876	1496.72	1214.34					-0.888187	-0.888574	0.0962216	0.285578	0.403938	0.317221	0.208234	0.118756	0.0555539	0.203026	1486.31	1185.75				25.85	25.8502	6.807	90	90	120	3939.23		COKPUP_clean
COKQAW_clean		1439.26	1100.36					0.17095	0.221625	0.159789	0.135733	0.0861585	0.0570818	0.115235	1460.9	1116.99					3.81229	3.81191	-3.7466	0.218565	0.280375	0.130847	0.194137	0.0965227	0.0720104	0.121035	1471.44	1166.94				25.898	25.8977	6.279	90	90	120	3647.11		COKQAW_clean
COKQEA_clean		1463.96	1251.78					0.195157	0.290772	0.081964	0.160427	0.0582313	0.0346318	0.0896973	1472.88	1259.44					-2.3517	-2.35208	-5.76644	0.263127	0.396425	0.181308	0.199512	0.0739721	0.0669429	0.0833444	1429.54	1098.32				25.994	25.9936	6.813	90	90	120.001	3986.61		COKQEA_clean
COKQIE_clean		1446.58	1282.68					0.247482	0.253074	0.252463	0.24313	0.0946613	0.042131	0.164702	1434.65	1272.08					-3.53963	-3.53963	-4.03777	0.272769	0.317417	0.244177	0.251698	0.0980704	0.0694866	0.136182	1429.27	1131.58				26.082	26.0823	6.878	90	90	120	4052.09		COKQIE_clean
COKQOK_clean		1475.67	1203.15					0.201817	0.275304	0.280665	0.141956	0.0943944	0.0446643	0.160701	1498.83	1222.04					-0.091938	-0.091938	-1.01862	0.200951	0.27151	0.261025	0.146602	0.0879226	0.0450957	0.145025	1485.93	1196.98				25.887	25.8869	6.821	90	90	119.999	3958.63		COKQOK_clean
COKROL_clean		442.514	368.678					0.108414	0.285663	0.0122036	0.0922882	0.0529956	0.0464991	0.0903502	387.79	323.07					-1.69023	0.953044	-0.644631	0.188285	0.465653	0.0545286	0.162608	0.0756197	0.0627879	0.149402	347.137	283.895				7.633	24.133	30.5291	90	93.5042	90	5613.17		COKROL_clean
COKRUR_clean	n= 2016	1720.57	1942.64												NA	NA		manually	110		-0.539517	-8.85253	3.28282	0.794911	0.812018	0.89931	0.791931	0.0933119	0.0879634	0.139025	NA	NA												COKRUR_clean
COLPEA_clean		0	0					0.240713	0.305185	0.325929	0.220826	0.0663584	0.0426393	0.170129	0	0					-5.73431	-6.26965	-3.5406	0.45806	0.54109	0.441656	0.439329	0.102219	0.097182	0.124256	0	0				17.554	28.815	8.42095	90	108.751	90	4033.4		COLPEA_clean
COMDOY_clean		1213.21	988.812					0.0883144	0.0748089	0	0.100302	0.0609419	0.0709438	0.0326032	1185.31	966.074					1.6488	0.145543	0.677047	0.0746199	0.0657791	0.00305076	0.0835255	0.0540793	0.0602287	0.0366561	1193.63	996.875				6.734	11.062	11.1809	119.649	107.526	90	678.992		COMDOY_clean
COMGUH_clean		0	0					0.547329	0.741079	1.2392	0.39631	0.195351	0.0419411	0.460707	0	0					-25.5519	5.95272	-4.59989	0.708157	1.08503	0.740742	0.557142	0.21104	0.090818	0.418991	0	0				8.649	14.7632	16.0328	104.345	97.3497	105.906	1864.81		COMGUH_clean
COMNAU_clean	occupancy	0	0												NA	NA			collapse												NA	NA												COMNAU_clean
COMZAH_clean		0	0					0.113113	0.153516	0.139327	0.111131	0.0715341	0.071487	0.0722171	0	0					-13.4239	8.03206	-17.4431	0.775943	0.623254	0.357187	0.789353	0.200872	0.204129	0.153654	0	0				23.267	15.235	16.835	90	90	90	5967.55		COMZAH_clean
COMZIP_clean	occupancy	0	0					0.505611	0.282946	0.202657	0.531007	0.194183	0.207572	0.0813341	0	0					-4.04128	10.0306	-3.3263	0.816213	0.657358	0.525115	0.835926	0.164997	0.166525	0.152116	0	0				9.622	28.628	10.48	90	111.377	90	2688.2		COMZIP_clean
COPXOV_clean		245.396	195.158					0.176522	0.193625	0.1803	0.175018	0.072646	0.0670774	0.114808	0	0					-1.23659	-4.86397	1.59714	0.190885	0.167863	0.164081	0.193362	0.0947305	0.0936807	0.102679	0	0				13.4	13.6696	46.3394	97.6629	90	119.35	7311.5		COPXOV_clean
COQGAS_clean		941.749	825.626					0.0701797	0.0561273	0.0393049	0.0723038	0.0485028	0.0504766	0.0330411	931.053	816.245					-2.63893	2.24552	-4.07802	0.190408	0.218268	0.225074	0.186845	0.0654218	0.0669994	0.053064	930.381	795.95				14.9	24.324	16.2528	90	113.232	90	5412.84		COQGAS_clean
COQHUN_clean		1263.81	1301.98					0.312153	0.317756	0.263316	0.31299	0.0645438	0.0518053	0.165294	1311.67	1351.35					-4.70445	-31.5839	0.828151	4.96469	5.05482	5.84242	4.93468	0.379834	0.346063	0.646933	0	0				12.399	33.418	12.9449	90	98.3104	90	5307.4		COQHUN_clean
COQJAV_clean		0	0					0.306243	0.377203	0.132852	0.304077	0.0647878	0.0525197	0.17152	0	0					4.1378	-8.00567	-5.94299	0.386091	0.348108	0.113546	0.394414	0.105189	0.103816	0.117135	0	0				16.929	18.469	28.3463	90	100.628	90	8710.76		COQJAV_clean
COQJID_clean	occupancy	873.208	684.809					0.846334	0.641587	0.385443	0.869799	0.623725	0.641582	0.470397	0	0					2.31263	7.26255	-7.32161	1.91722	1.778	1.60912	1.93306	0.415367	0.410991	0.452947	NA	NA				12.358	33.951	12.9504	90	99.8885	90	5352.83		COQJID_clean
COQJOJ_clean		1169.89	1090.22					0.335934	0.252806	0.18886	0.345317	0.136651	0.135646	0.146419	1097.71	1022.94					-7.54996	10.914	-0.20641	5.41947	5.91989	5.72274	5.37676	0.271366	0.19299	1.03376	1016.6	936.305				12.359	33.229	12.8868	90	96.4202	90	5259.12		COQJOJ_clean
COQJUP_clean	occupancy	1095.72	986.408					0.603738	0.554403	0.178873	0.616684	0.367481	0.38522	0.18566	1072.21	965.259					3.32011	34.2621	4.85495	4.72183	4.89381	4.55919	4.71385	0.538266	0.490981	1.02293	NA	NA				12.352	33.725	13.0301	90	96.6281	90	5391.69		COQJUP_clean
COQLAX_clean	n= 2520	0	0												NA	NA															NA	NA												COQLAX_clean
COQNIF_clean		1584.86	1189.83					0.213837	0.22886	0.193983	0.173596	0.0471893	0.0319855	0.0623932	1647.15	1236.55					-1.00345	-1.00816	-5.45722	0.183608	0.188785	0.226886	0.119624	0.0690046	0.0677447	0.0702645	1430.29	994.883				12.746	12.7457	9.14	90	90	120.001	1285.91		COQNIF_clean
COQTEJ_clean		2296.33	3290.76					0.625572	0.623136	0.935414	0.612524	0.07546	0.0387877	0.272157	2163.72	3100.74					0.463291	-10.4662	-50.1988	6.63349	6.81536	6.94128	6.58848	0.457691	0.344016	1.0674	0	0				34.341	10.045	17.7379	90	96.2335	90	6082.61		COQTEJ_clean
CORZIU_clean		2065.75	2870.61					0.569039	0.700953	0.62799	0.554367	0.112226	0.0624936	0.423051	1980.32	2751.9					-6.94502	-6.87695	-62.8175	3.6635	3.82374	3.51278	3.65578	1.06604	0.993789	1.5176	449.376	199.669				24.681	24.681	10.819	90	90	90	6590.41		CORZIU_clean
COSMII_clean		2226.6	2518.85					1.90784	2.04644	1.97614	1.89214	0.106765	0.0531815	0.441663	1548.54	1751.78					13.1498	-40.0233	-36.2397	4.77775	4.86323	4.95669	4.76184	0.813874	0.638602	1.90932	0	0				14.123	18.7388	18.7391	66.0878	75.4491	104.548	4023.81		COSMII_clean
COSWEO_clean		0	0					1.14132	1.30806	1.36981	0.987695	0.321352	0.249306	0.402403	471.022	222.02			collapse																	20.812	6.649	20.865	90	90	90	2887.28		COSWEO_clean
COTVIS_clean		0	0					1.22018	1.24505	1.1066	1.21754	0.129882	0.0640105	0.325851	898.363	702.857					-3.94513	-30.1006	-10.3897	2.06846	2.21955	2.0937	2.02138	0.30619	0.257811	0.450117	0	0				14.595	16.733	19.5708	90	107.343	90	4562.25		COTVIS_clean
COTVOY_clean		1058.55	810.942					1.27768	1.33475	1.19134	1.26379	0.111692	0.0572932	0.276401	0	0					-2.6408	-58.5681	12.8922	2.21769	2.32991	1.93502	2.1959	0.442876	0.287854	0.91225	0	0				14.439	16.413	19.3314	90	107.605	90	4366.73		COTVOY_clean
COTVUE_clean		1119.7	844.765					0.743202	0.781313	0.722056	0.73215	0.104504	0.0578986	0.245614	0	0					-1.14279	-53.4798	11.4324	2.38854	2.67186	2.49182	2.29367	0.310093	0.177655	0.711083	0	0				14.482	16.714	19.2135	90	108.04	90	4422.04		COTVUE_clean
COTXEQ_clean		736.674	681.316					0.0887746		0.0227487	0.0894624	0.0565417	0.0590988	0.0122184	621.265	574.562					5.09126	-11.6082	-21.928	2.20505		1.08016	2.21677	0.241664	0.151773	1.79978	0	0				15.866	15.866	21.799	90	90	90	5487.46		COTXEQ_clean
COTXIU_clean		719.372	663.976					0.123286		0.0293144	0.124265	0.0596256	0.0615777	0.0257883	610.823	563.777					3.8394	3.69599	-26.2098	1.69358		0.378241	1.70728	0.177637	0.107485	1.39361	0	0				15.898	15.898	21.668	90	90	90	5476.51		COTXIU_clean
COTXOA_clean		701.274	646.609					0.127075		0.0245516	0.128143	0.0666029	0.0686905	0.0297203	617.211	569.074					3.83701	3.84707	-26.1578	1.68216		0.332785	1.69621	0.190749	0.1229	1.3894	0	0				15.908	15.908	21.618	90	90	90	5470.75		COTXOA_clean
COTYIV_clean	n= 1232	1780.03	1838.39												NA	NA					4.03523	-2.47603	-0.636913	0.253822		0.356845	0.246667	0.043124	0.0341705	0.0793858	NA	NA												COTYIV_clean
COVJAA_clean		0	0					0.295617	0.281895	0.11623	0.305466	0.0851423	0.0654389	0.174704	0	0					-3.85068	-3.84608	3.01812	0.428377	0.402796	0.154098	0.443874	0.0939537	0.0760446	0.175359	0	0				15.197	15.197	22.153	90	90	90	5116.21		COVJAA_clean
COVPAG_clean		431.733	321.488					0.380001	0.416416	0.362672	0.36927	0.0984298	0.0549187	0.175783	692.393	515.587					-1.9748	-5.38901	-1.01254	1.73815	1.97793	1.81542	1.64356	0.501075	0.202262	1.0323	0	0				19.764	19.948	12.039	90	90	90	4746.4		COVPAG_clean
COVYIX_clean		0	0					0.316713	0.308662	0.173954	0.33061	0.0602916	0.0478498	0.0899607	0	0					0.144988	-0.480004	-3.3285	0.40253	0.376584	0.277413	0.417407	0.0830667	0.0676845	0.119748	0	0				10.553	10.8746	15.3641	76.5447	82.1027	79.927	1679.72		COVYIX_clean
COWBEX_clean		401.296	233.585					0.277685	0.303296	0.462541	0.266418	0.0616736	0.0419835	0.161765	444.299	258.607					-13.8795	4.12333	-2.5583	0.792543	0.765772	0.956264	0.790322	0.160275	0.149717	0.213944	0	0				16.012	7.55	27.8153	90	99.7322	90	3314.22		COWBEX_clean
COWDEZ_clean	occupancy	1012.11	244.64												NA	NA		manually	58		-25.9669	-6.0855	-26.6215	7.75987	7.64454	7.73739	7.83399	1.29077	1.00897	1.60153	NA	NA												COWDEZ_clean
COWMAD_clean		1847.49	1510.71					0.781163	0.867245	1.0691	0.736473	0.124916	0.0557203	0.283078	1808.57	1478.79					-1.15958	-2.02033	-3.52053	0.326305	0.47464	0.650297	0.25886	0.129872	0.0850346	0.232358	1739.02	1321.38				9.598	13.879	15.3438	90	93.4524	90	2040.25		COWMAD_clean
COWMEH_clean		1852.91	1535.84					0.779854	0.882604	1.07764	0.72906	0.126308	0.0546304	0.290143	1834.29	1520.45					-1.40786	-1.97297	-3.76932	0.294188	0.454319	0.615666	0.222951	0.13262	0.0855176	0.240283	1757.22	1346.84				9.621	13.908	15.3374	90	93.4239	90	2048.62		COWMEH_clean
COWMIL_clean		1855.2	1498.29					0.775342	0.866354	1.04959	0.729768	0.12598	0.05804	0.28127	1819.21	1469.35					-0.901124	-1.67875	-3.38955	0.289546	0.447624	0.592456	0.220025	0.128091	0.0825777	0.232121	1713.72	1296.12				9.574	13.832	15.3446	90	93.4373	90	2028.39		COWMIL_clean
COWMOR_clean		1855.71	1488.23					0.764474	0.861439	1.04899	0.716346	0.123951	0.0576519	0.275493	1824.3	1462.98					-0.87252	-1.55686	-3.50261	0.282623	0.452205	0.591423	0.208941	0.123038	0.0784874	0.224866	1733.01	1302.01				9.563	13.874	15.2997	90	93.3836	90	2026.38		COWMOR_clean
COWMUX_clean		1860.24	1476.51					0.761651	0.854848	1.03461	0.715421	0.11959	0.054385	0.268632	1819.57	1444.32					-0.711202	-1.35007	-3.25832	0.282171	0.450848	0.586719	0.209026	0.120296	0.0776445	0.217786	1763.3	1319.25				9.543	13.822	15.2997	90	93.3874	90	2014.56		COWMUX_clean
COWRAJ_clean		0	0					0.174215	0.250131	0.281721	0.157769	0.0609614	0.0500587	0.13105	0	0					-16.8224	-2.16539	-1.67982	1.73103	1.85556	1.75097	1.71031	0.248644	0.255596	0.203948	0	0				16.703	20.02	17.4601	90	100.424	90	5742.19		COWRAJ_clean
COWREN_clean		0	0					0.21837	0.256688	0.237955	0.211968	0.0635639	0.0533987	0.127944	0	0					4.79845	17.8381	-6.31207	3.596	3.19643	3.09708	3.67367	0.301001	0.291927	0.358469	1179.23	1041.53				16.703	20.02	17.4601	90	100.424	90	5742.19		COWREN_clean
COWRIR_clean		0	0					0.196791	0.276621	0.323477	0.178951	0.0601789	0.0499224	0.126113	0	0					-17.1236	-2.2523	-1.36997	1.61674	1.74633	1.63666	1.59521	0.245588	0.252431	0.201597	0	0				16.703	20.02	17.4601	90	100.424	90	5742.19		COWRIR_clean
COWROX_clean		0	0					0.204489	0.260286	0.322692	0.190833	0.0860007	0.0640728	0.209345	0	0					-16.8901	-2.35221	-1.84477	1.69681	1.77703	1.71092	1.68342	0.258773	0.27383	0.174077	0	0				16.703	20.02	17.4601	90	100.424	90	5742.19		COWROX_clean
COWXOC_clean		0	0					0.307225	0.348973	0.207122	0.306103	0.089135	0.0892574	0.0882598	0	0					-1.1164	-1.11577	-0.916251	0.308316	0.333465	0.19707	0.308882	0.0942785	0.0965295	0.0781755	0	0				15.864	15.8636	20.0595	84.2264	84.2262	71.3994	4747.63		COWXOC_clean
COXCUP_clean		0	0					0.223601		0.297186	0.216593	0.0496633	0.0467854	0.0602157	0	0					1.82989	-7.59387	-0.60124	0.431479		0.344976	0.439718	0.0675853	0.0636747	0.0819243	0	0				26.209	11.628	16.1165	90	122.49	90	4142.89		COXCUP_clean
COXDIE_clean		902.439	542.017					0.204621		0.413762	0.185165	0.0846281	0.0887883	0.0672937	890.783	535.029					6.7753	-15.9757	-13.4168	1.53774		1.17994	1.57102	0.209099	0.205859	0.222599	0	0				24.148	15.173	15.4972	90	118.978	90	4967.27		COXDIE_clean
COXHED_clean		2286.77	3325.73					0.052789	0.0775335	0	0.0208965	0.0307529	0.008941	0.0580178	2257.45	3283.15					-7.98607	-7.98607	-7.98607	0.107514	0.150071	1.33227e-15	0.0582364	0.0789658	0.115096	0.0338033	2320.18	2628.73				15.452	15.452	15.452	90	90	90	3689.39		COXHED_clean
COXHIH_clean		2264.3	3207.5					0.0793246	0.0540198	0.000623944	0.156168	0.0616005	0.099645	0.0140449	2235.23	3166.01					-12.6632	-12.6632	-12.6632	1.31815	1.26382	0.934573	1.55465	0.47617	0.539335	0.397213	1865	1759.96				15.31	15.31	15.31	90	90	90	3588.6		COXHIH_clean
COXHON_clean		2281.03	3460.67					0.2566	0.0918328	0.000362626	0.671548	0.185771	0.33246	0.00240889	2280.87	3460.22					-6.9112	-5.6524	-6.99845	0.527913	0.3808	0.24859	0.915247	0.242058	0.360915	0.0934852	2215.15	2745.03				15.586	15.586	15.586	90	90	90	3786.2		COXHON_clean
COXQUB_clean		0	0					0.38837	0.876446	0.672235	0.321523	0.0813438	0.0520502	0.244086	0	0					-9.69176	-2.01842	-13.3477	0.500054	0.870615	0.681481	0.450818	0.119194	0.128831	0.0656535	0	0				9.755	13.2431	13.5961	118.304	90	111.613	1404.61		COXQUB_clean
COXXIX_clean		538.634	373.016					0.510098		0.45895	0.519688	0.137088	0.0113828	0.19994	940.417	651.272					-4.15347	-6.00334	-8.33813	0.323189		0.175018	0.350971	0.158291	0.0809836	0.196945	446.22	255.127				7.333	14.372	18.0701	90	90.8688	90	1904.19		COXXIX_clean
COYCEZ_clean		1350.98	1159.76					0.559608		0.494367	0.564268	0.0743578	0.0571571	0.126438	1337.23	1147.99					-4.15788	3.09273	2.56613	0.574353		0.577911	0.574099	0.0832105	0.0721143	0.116807	1390.79	1212.58				10	17.6643	27.294	90	90	100.51	4740.41		COYCEZ_clean
COYCID_clean		1702.98	1828.95					1.55153		1.3821	1.56481	0.0888305	0.0721252	0.134538	1663.3	1786.32					-1.45286	1.35863	7.93882	0.285693		0.423925	0.274851	0.0874814	0.0757867	0.119479	1667.22	1927.04				17.104	18.3055	20.2357	75.3044	86.8811	67.4093	5651.68		COYCID_clean
COYTEQ_clean		0	0					0.269611	0.314575	0.409	0.251821	0.0781138	0.0415052	0.173615	0	0					3.05858	1.43117	-7.42502	0.935621	0.954748	0.963338	0.929426	0.160039	0.0624622	0.414589	592.59	328.845				12.12	12.3608	12.807	90	90	114.975	1739.24		COYTEQ_clean
COYTIU_clean		0	0					0.206488	0.28432	0.291544	0.182486	0.0571216	0.0275929	0.136721	0	0					1.60046	-0.26955	-1.57154	0.254979	0.318034	0.333631	0.23511	0.064265	0.0358939	0.140744	0	0				12.134	12.3907	12.72	90	90	114.778	1736.37		COYTIU_clean
COYTOA_clean		0	0					0.303103	0.340266	0.379987	0.292157	0.052637	0.0376911	0.0953396	0	0					1.83426	0.617997	-1.58772	0.242716	0.288536	0.332731	0.22942	0.0559088	0.0423419	0.0946713	0	0				12.065	12.3791	12.515	90	90	115.068	1693.1		COYTOA_clean
COYTUG01_clean		0	0					0.342876	0.326419	0.312138	0.34994	0.0570108	0.0390135	0.103063	0	0					-3.7873	10.7979	-7.25514	0.628252	0.599826	0.804511	0.626119	0.0931776	0.0799738	0.126964	0	0				12.13	12.7016	21.8189	82.7494	74.6739	61.4777	2848.61		COYTUG01_clean
COYTUG_clean		0	0					0.341389	0.328719	0.312146	0.347176	0.0588819	0.037193	0.111297	0	0					-7.44847	10.5782	-6.95999	0.803328	0.803805	0.83375	0.801277	0.106799	0.0890321	0.149737	0	0				12.13	12.7016	21.8189	82.7494	74.6739	61.4777	2848.61		COYTUG_clean
COYVAO01_clean		0	0					0.293756	0.315498	0.310735	0.284946	0.0478887	0.0350611	0.077257	0	0					-3.93307	14.7202	-7.9682	0.743383	0.656331	0.918372	0.762983	0.113772	0.0973588	0.151349	0	0				12.102	12.6799	21.6953	82.7594	74.6858	61.4966	2821.77		COYVAO01_clean
COYVAO_clean		0	0					0.293332	0.314135	0.31116	0.2848	0.0479918	0.0352329	0.0788259	0	0					-3.32824	11.1825	-7.15971	0.589592	0.540039	0.820095	0.592304	0.100756	0.0836499	0.142096	0	0				12.102	12.6799	21.6953	82.7594	74.6858	61.4966	2821.77		COYVAO_clean
COYVES01_clean		0	0					0.354209	0.347623	0.305719	0.359298	0.0558196	0.0358401	0.106944	0	0					-4.21573	14.0898	-7.73275	0.782294	0.718728	0.924559	0.793267	0.101584	0.0931874	0.123071	0	0				12.126	12.6786	21.5677	82.7586	74.7169	61.4317	2809.14		COYVES01_clean
COYVES_clean		0	0					0.353521	0.351436	0.30564	0.357165	0.0554992	0.0357623	0.106002	0	0					-3.34323	11.9476	-7.0382	0.657587	0.627485	0.83706	0.655777	0.089698	0.0797213	0.115227	0	0				12.126	12.6786	21.5677	82.7586	74.7169	61.4317	2809.14		COYVES_clean
COZMUA_clean		2098.61	3293.84					0.310131	0.331669	0.622497	0.293173	0.0881142	0.0603698	0.243482	2100.1	3296.08					-3.36441	-5.70824	-2.89666	0.317425	0.31935	0.552675	0.307086	0.123515	0.105243	0.225836	1956.03	2715.66				15.509	17.825	24.221	90	90	90	6695.85		COZMUA_clean
CSCNCA01_clean		0	0					0.0160045		0	0.0186719	0.0153468	0.00869652	0.0186719	0	0					-24.2035	-19.0797	-18.7951	1.60312		1.63444	1.5979	0.455285	0.445228	0.460313	0	0				12.789	12.789	12.789	90	90	90	2091.75		CSCNCA01_clean
CSMNOX_clean	metalvsorganic	0	0					1.07362	1.05934	1.26875	0.976847	0.344658	0.163097	0.429764	0	0					-31.671	-26.8892	3.34425	1.16508	1.16789	1.21759	1.12353	0.320847	0.307423	0.32714	0	0				7.289	10.5249	5.98659	92.1568	102.738	92.8374	446.859		CSMNOX_clean
CUBHOY_clean		1208.59	841.46					0.386461	0.547702	0.545919	0.342594	0.08665	0.0499056	0.205362	1310.98	912.732					10.8649	-38.26	1.39281	1.77782	2.23433	1.92081	1.67232	0.492753	0.41603	0.74063	0	0				23.286	17.258	18.2217	90	126.662	90	5874.1		CUBHOY_clean
CUBKUF_clean		0	0					1.00219		0.520557	1.01663	0.0802761	0.058087	0.225892	0	0					-3.86205	-16.4546	-4.81879	7.68729		7.79201	7.68415	0.350256	0.309232	0.619473	0	0				12.488	13.1945	19.756	78.9601	84.554	63.87	2868.27		CUBKUF_clean
CUCKIV_charged		463.15	350.313					0.30602	0.453938	0.112785	0.272131	0.0826113	0.0376577	0.227462	1033.87	781.987					-0.552017	-0.434721	-0.468056	0.319792	0.515342	0.0390491	0.276714	0.102019	0.0545119	0.255098	1255.64	948.39				10.833	14.17	14.4	100.519	90	90	2173.3		CUCKIV_charged
CUCSAU_clean		968.591	1152.64					0.197119		0.122432	0.200545	0.0674597	0.0722632	0.0465162	864.736	1029.04					-2.82555	-5.52493	-4.74813	0.405689		0.266474	0.412075	0.12574	0.128128	0.115328	0	0				11.205	16.726	17.1514	64.593	80.096	85.2261	2860.11		CUCSAU_clean
CUCTAX_clean		198.577	146.619					0.094592	0.101056	0.146298	0.0928607	0.0615543	0.0590496	0.0872269	185.978	137.313					7.0943	-9.79033	-4.34843	0.519403	0.559874	0.547494	0.516483	0.105584	0.104864	0.112958	240.374	161.939				28.654	15.033	16.5898	90	119.905	90	6194.66		CUCTAX_clean
CUFDUD_clean		2356.46	2520.45					0.3074	0.367556	0.342367	0.275137	0.107518	0.0408893	0.240776	2339.88	2502.73					-4.71877	-4.7246	10.5256	0.579068	0.736396	0.735117	0.490651	0.133446	0.0714161	0.257506	2289.27	2456.73				29.145	29.1458	16.991	90	90	120	12499.4		CUFDUD_clean
CUFFAL_clean		2375.47	2598.74					0.275558	0.344775	0.323542	0.237951	0.109584	0.0440308	0.240691	2366.11	2588.5					-4.79986	-4.7978	8.24552	0.486424	0.644954	0.645816	0.397197	0.131015	0.0648581	0.263329	2309.8	2479.01				29.155	29.1548	17.367	90	90	119.999	12784.5		CUFFAL_clean
CUFFEP_clean		2404.98	2673.01					0.518892	0.570308	0.178116	0.513012	0.126703	0.0315776	0.285246	2348.63	2610.42					1.19185	1.19137	1.19137	0.497281	0.59495	0.237241	0.453839	0.136569	0.0416154	0.294824	2435.53	2804.87				20.464	20.464	20.464	90	90	90	8569.82		CUFFEP_clean
CUFGIV_clean		2398.01	2580.46					0.246487	0.306079	0.282526	0.233368	0.0649071	0.0479965	0.141774	2388.15	2569.85					-1.59595	-8.8991	5.01871	0.805475	0.735431	0.435592	0.831813	0.109145	0.0975091	0.162038	2105.86	2132.12				36.768	21.228	19.238	90	90	90	15015.5		CUFGIV_clean
CUFGOB_clean		0	0					0.698465	0.967453	0.942593	0.617612	0.139404	0.0423017	0.42464	175.721	85.9422					-2.90386	-13.3321	-4.56091	0.894602	0.800488	0.571288	0.941191	0.266509	0.226095	0.385224	0	0				12.525	32.218	7.60979	90	98.8595	90	3034.14		CUFGOB_clean
CUFGUH_clean		0	0					0.905573	1.17899	1.02121	0.833582	0.155945	0.044206	0.48418	224.844	109.127					-2.91877	-13.2759	-4.27034	0.89772	0.812414	0.570127	0.942606	0.266977	0.225386	0.38915	0	0				12.509	32.165	7.6021	90	98.8304	90	3022.47		CUFGUH_clean
CUFJUK_clean		0	0					0.342964	0.365962	0.167914	0.351646	0.0897827	0.0559733	0.188957	0	0					-1.27131	-15.181	2.37741	0.473447	0.5871	0.289315	0.456267	0.151582	0.140352	0.184525	0	0				10.847	6.339	16.8843	90	105.591	90	1118.23		CUFJUK_clean
CUFQUR_clean	Z>86	701.454	341.275												NA	NA															NA	NA												CUFQUR_clean
CUGFAN01_clean		0	0					0.0994372	0.0551275	0.0983601	0.102188	0.0550333	0.0554587	0.0535654	0	0					-9.47185	0.319235	-15.4518	0.674244	0.640614	0.601373	0.680698	0.152965	0.149862	0.16367	0	0				8.865	10.5561	10.6308	99.9879	110.236	97.8185	898.354		CUGFAN01_clean
CUGFAN_clean		0	0					0.0990855	0.0650754	0.0847448	0.102016	0.053621	0.0557862	0.0459345	0	0					-8.80875	-0.728387	-17.859	0.704853	0.67078	0.603948	0.713033	0.167184	0.163066	0.181805	0	0				8.802	10.6671	10.942	103.157	108.191	97.4115	927.908		CUGFAN_clean
CUGFOB_clean		0	0					0.129791	0.043796	0.121918	0.13548	0.0528892	0.0574462	0.036712	0	0					-2.37107	-2.55492	-1.6175	0.120931	0.0784095	0.0851356	0.125678	0.0760849	0.0835938	0.0494286	0	0				9.016	10.7478	10.8068	97.5682	97.7055	110.102	956.579		CUGFOB_clean
CUGFUH_clean		0	0					0.501611	0.278131	0.3284	0.525653	0.066897	0.0552328	0.107138	0	0					-8.06435	-7.40479	-3.15459	0.372326	0.277308	0.238355	0.386204	0.120956	0.119327	0.126576	0	0				8.997	10.5169	10.6862	98.0091	97.4361	111.111	916.247		CUGFUH_clean
CUGLIB_clean	occupancy	627.17	261.056					1.7196		0.483342	1.84323	0.71187	0.790901	0.184992	0	0															NA	NA				28.503	28.503	3.538	90	90	90	2874.35		CUGLIB_clean
CUGLTM01_clean		0	0					0.541855	0.450301	0.597487	0.5575	0.0905726	0.0610206	0.185139	0	0					-3.72639	-2.27941	-8.75483	0.347721	0.331019	0.27151	0.356743	0.132813	0.121043	0.170476	0	0				7.226	10.305	11.05	90	90	90	822.826		CUGLTM01_clean
CUGLTM02_clean		0	0					0.546823	0.458194	0.611678	0.561182	0.0888739	0.0576551	0.188774	0	0					-3.60633	-2.35574	-7.6352	0.300864	0.328921	0.295386	0.295243	0.12607	0.112595	0.169193	0	0				7.232	10.311	11.058	90	90	90	824.586		CUGLTM02_clean
CUGLTM_clean	occupancy	0	0					0.559019	0.483692	0.639979	0.569377	0.115775	0.0665641	0.247005	0	0					-3.0583	-2.97778	-8.82353	0.333069	0.340251	0.288542	0.334711	0.158115	0.120101	0.259486	0	0				7.238	10.35	11.084	90	90	90	830.339		CUGLTM_clean
CUGQEC_clean		1622.53	1705.59					1.36047	0.294097	0.933191	1.41383	0.0768991	0.0654599	0.155933	1369.75	1439.89					-2.74716	-5.23783	-7.9371	1.46612	0.656413	1.31013	1.49727	0.260175	0.234043	0.440726	0	0				10.877	12.6977	14.3731	113.643	92.0693	114.581	1603.87		CUGQEC_clean
CUGVUW_clean		536.567	405.882					0.30347		0.000315801	0.309786	0.0579301	0.053559	0.0972702	609.185	460.814					1.94644	2.43915	2.35228	0.393664		0.0039866	0.401782	0.0630461	0.0557207	0.128975	745.539	603.251				8.981	16.0016	16.0018	63.4158	79.2162	100.784	1921.78		CUGVUW_clean
CUGVUX_clean		0	0					0.46265	0.329618	0.390433	0.47734	0.0488328	0.0435823	0.0795858	0	0					-9.85045	-17.4045	17.086	1.27633	1.05954	1.43827	1.28515	0.227031	0.198924	0.391659	0	0				10.772	21.752	9.85727	90	111.727	90	2145.6		CUGVUX_clean
CUGXAF_clean	n= 1890	1475.05	1653.37												NA	NA					-3.81879	-3.81932	-1.75725	0.294161	0.283505	0.100192	0.302048	0.0987201	0.0920673	0.138267	NA	NA												CUGXAF_clean
CUGYIO_clean	occupancy	677.196	284.866					1.2857		1.05929	1.30834	0.66438	0.737247	0.300047	0	0															NA	NA				28.708	28.708	3.525	90	90	90	2905.13		CUGYIO_clean
CUGYOU_clean	occupancy	743.19	327.448					1.85244		1.2965	1.91659	0.645555	0.677668	0.431467	826.296	364.041					-27.3503	10.6784	-16.0161	1.78463		1.07791	1.86617	0.752158	0.822607	0.282498	NA	NA				29.634	29.634	3.491	90	90	90	3065.71		CUGYOU_clean
CUGYUA_clean	occupancy	318.734	122.535					1.63433		0.922367	1.71648	0.550961	0.5282	0.695111	0	0					0.0719609	1.09946	-17.4595	1.68796		1.43694	1.71692	0.407244	0.444714	0.169936	NA	NA				19.455	19.455	3.534	90	90	90	1337.61		CUGYUA_clean
CUGZAH_clean	occupancy	678.471	302.392					1.31052		0.361865	1.40539	0.740984	0.80892	0.310727	0	0		manually	54		-8.20252	-7.7348	1.95085	2.55409		2.20644	2.58886	0.524331	0.550803	0.356678	NA	NA				29.419	29.419	3.556	90	90	90	3077.64		CUGZAH_clean
CUHLUO_clean	occupancy	751.513	669.657			collapse		2.12349		2.08409	2.1238	2.06002	2.07827	1.31202	0	0					26.3696	11.6719	-32.5615	5.66015		5.82939	5.65881	0.915763	0.918435	0.806228	NA	NA				13.101	13.1009	25.985	90	90	119.998	3862.49		CUHLUO_clean
CUIMDZ01_clean_h		72.0246	43.1895					0.262974		0.224626	0.265371	0.0314375	0.0333921	0.0236188	0	0					-1.70429	1.3546	1.3927	0.273112		0.217905	0.276562	0.0344756	0.0389202	0.0166969	49.6745	30.1065				5.387	16.012	16.012	61.2388	83.5598	96.4402	1181.03		CUIMDZ01_clean_h
CUKVUA_clean		0	0					0.377603	0.483612	0.419192	0.373507	0.0707632	0.0635037	0.157877	0	0																				9.352	11.347	18.8074	79.4608	79.4609	66.5143	1786.13		CUKVUA_clean
CUKXAJ_clean		0	0					0.180644	0.252071	0.0444498	0.15005	0.0738445	0.0411447	0.128344	543.756	292.784					0.789106	-32.2122	-0.672298	0.517469	0.450985	0.315647	0.58702	0.154795	0.122069	0.209339	0	0				20.745	8.325	17.343	90	90	90	2995.17		CUKXAJ_clean
CUKXIR_clean		0	0					0.559628	0.5937	0.794537	0.514176	0.0901388	0.0332352	0.252721	0	0					-22.9335	-7.56408	-9.33348	1.54246	1.43572	0.937745	1.66971	0.199826	0.200148	0.198905	0	0				19.104	9.543	17.671	90	90	90	3221.59		CUKXIR_clean
CUKXOW_clean		749.828	453.061					0.496677	0.496379	0.386665	0.503453	0.0723667	0.0395564	0.150075	854.253	516.119					-0.930947	-0.929999	-14.4503	0.612061	0.788166	0.356217	0.563528	0.234913	0.137687	0.465184	0	0				10.548	10.5483	14.724	90.5691	90.572	105.636	1577.4		CUKXOW_clean
CUKXUC_clean		772.133	479.519					0.493484	0.49075	0.401932	0.500027	0.0745098	0.0417523	0.152093	870.781	540.782					-1.23781	-1.23592	-15.9621	0.657561	0.718922	0.510322	0.644172	0.258945	0.177244	0.452446	0	0				10.575	10.5753	14.8013	90.6059	90.6078	105.775	1592.7		CUKXUC_clean
CUKYAJ_clean		785.806	473.933					0.473564	0.499174	0.395918	0.468957	0.0802437	0.0449492	0.163836	895.234	539.933					-1.5158	-1.5158	-14.4089	0.641054	0.857106	0.316925	0.582134	0.248307	0.148488	0.484721	0	0				10.562	10.5621	14.8022	90.598	90.5961	105.761	1588.97		CUKYAJ_clean
CUKZOY_clean		782.952	616.446					0.359602		0.334914	0.360484	0.106598	0.0727527	0.433772	0	0					0.100599	14.7929	-33.5109	1.72841		1.67132	1.73045	0.327632	0.229468	1.27655	0	0				13.022	18.755	13.4028	90	107.718	90	3118.07		CUKZOY_clean
CUMDEU_clean		473.471	287.785			collapse		2.28159	1.30666	1.47441	2.75708	1.53053	1.78862	1.01436	1095.97	666.164		manually	38		3.3873	-29.3483	-27.281	1.67404	1.5422	1.60154	1.73572	0.530772	0.4135	0.765316	0	0				22.915	14.28	5.64535	90	102.803	90	1801.38		CUMDEU_clean
CUMDIY_clean		506.897	251.969					1.31129	1.06352	1.14723	1.36975	0.370295	0.111481	0.906411	615.442	305.916					-1.68853	-0.563008	-8.74753	0.56299	0.55566	0.912804	0.549942	0.39517	0.171699	0.858073	384.895	169.543				5.763	10.2129	11.6489	84.2404	89.0507	82.8736	676.882		CUMDIY_clean
CUMDOE_clean		975.346	609.386					1.70669	1.71032	1.60301	1.71041	0.401157	0.188554	0.826364	773.199	483.092																				5.754	14.126	21.1561	90	90.1408	90	1719.58		CUMDOE_clean
CUMDUK_clean		0	0					0.543526	0.554721	0.645208	0.533415	0.0712181	0.0508042	0.126627	963.975	624.125					-22.9279	-11.6325	-2.33032	3.04617	2.94092	3.66272	3.0256	0.336986	0.245981	0.583998	0	0				18.45	20.71	14.174	90	90	90	5415.88		CUMDUK_clean
CUMJEB_clean		470.04	234.021					0.119239		0.10885	0.119816	0.0435454	0.0402081	0.0541134	536.527	267.118					-3.0207	-3.0207	-7.24167	0.412484		0.134013	0.427954	0.0908667	0.0870039	0.103099	0	0				20.82	20.8194	11.558	90	90	120.001	4338.68		CUMJEB_clean
CUMKIG03_clean		0	0					0.41488		0.000221818	0.4192	0.0765277	0.0641228	0.287413	0	0					1.07342	1.55469	-18.4743	5.90735		5.91492	5.90727	0.303106	0.278275	0.725227	0	0				9.241	9.95735	13.3019	78.3932	73.5806	81.9814	1145.61		CUMKIG03_clean
CUMKIG_clean		0	0					0.254281		0.000355389	0.256926	0.0772724	0.0658785	0.270968	0	0					0.322525	1.21375	-18.2205	4.11318		4.01028	4.11425	0.302515	0.277802	0.722637	0	0				9.308	9.99387	13.265	78.1523	73.7407	82.7513	1156.26		CUMKIG_clean
CUMLUT_clean		1709.5	1404.45					0.504171	0.630243	0.664459	0.427778	0.107239	0.043148	0.272043	1528.52	1255.84					-0.648276	-55.0823	-5.31651	5.15435	5.11298	4.93662	5.19318	0.523536	0.240293	1.25188	0	0				10.212	13.87	12.3111	90	90.2001	90	1743.74		CUMLUT_clean
CUMQOQ_clean		1458.89	1492.92					1.43961	1.25772	1.94605	1.42761	0.119294	0.052896	0.590716	1573.12	1609.85					4.22156	-29.3578	-40.7099	3.57327	2.35315	3.02376	3.67219	0.553022	0.510173	0.857251	0	0				11.491	12.0943	12.6201	69.61	64.1479	72.4595	1456.06		CUMQOQ_clean
CUNFOH01_clean		1561.19	944.682																		1.35611	1.35935	1.35676	0.137822		0.393281	0.101328	0.114933	0.0574192	0.193637	1562.73	983.297												CUNFOH01_clean
CUNFOH_clean		1620.95	990.393																		1.56928	1.56992	1.57057	0.22467		0.406372	0.196716	0.0976294	0.062005	0.152114	1686.23	1078.04												CUNFOH_clean
CUNQOT_clean	metalvsorganic	878.342	562.866					0.784549	0.847426	1.21137	0.599249	0.437983	0.188569	0.812105	0	0					-3.65243	-6.96303	-6.37682	2.48184	2.21284	2.55387	2.80008	0.592504	0.418918	0.852882	0	0				5.567	15.63	9.54071	90	91.8019	90	829.748		CUNQOT_clean
CUNQUZ_clean		922.458	475.271					0.816688	0.829367	0.942816	0.769309	0.374819	0.206362	0.627504	537.446	276.899																				5.634	15.943	9.61781	90	91.1141	90	863.736		CUNQUZ_clean
CUNRAG_clean	metalvsorganic	0	0					0.657565	0.688346	0.389838	0.666791	0.284825	0.221399	0.435459	0	0					-12.3875	-12.4162	3.5397	2.21347	2.117	1.45613	2.36193	0.590667	0.444749	0.937222	0	0				6.215	18.839	16.6566	90	92.2296	90	1948.75		CUNRAG_clean
CUNWEO_clean		1015.11	824.322					0.255786	0.235812	0.270707	0.257085	0.0527886	0.0400551	0.145107	1019.33	827.756					-1.54379	-0.16647	0.0476724	0.222706	0.176897	0.292487	0.224975	0.0555998	0.0435017	0.143312	989.895	789.758				8.393	18.7423	22.235	90	90	94.0294	3489.01		CUNWEO_clean
CUPHIG_clean		2320.34	3023.18					0.272163	0.226979	0.0819605	0.29277	0.140539	0.154202	0.0524941	2235.35	2912.46					-0.0149423	0.61904	2.60228	0.764265	0.473178	0.441463	0.846884	0.133531	0.142952	0.0728207	2158.57	2904.99				18.739	18.7384	37.486	90	90	119.999	11399.4		CUPHIG_clean
CUPHUS_clean		2031.48	2983.4					0.687017		0.482895	0.69212	0.0761089	0.070816	0.131685	1818.59	2670.76					-29.5536	29.1315	-50.6224	6.16334		5.67331	6.17559	0.623679	0.594187	0.933345	0	0				18.097	28.437	28.502	90	90	90	14667.8		CUPHUS_clean
CUQDOH_clean		985.351	964.565					0.11941		1.1004	0.100175	0.0850821	0.0523589	0.499577	0	0					-11.3955	3.67802	-21.5516	2.99879		3.63579	2.9863	0.66757	0.591959	1.62531	0	0				37.951	8.047	20.882	90	93.7204	90	6363.75		CUQDOH_clean
CUQKOQ_clean	Z>86	1512.45	860.695												NA	NA															NA	NA												CUQKOQ_clean
CUQRIR_clean		1172.26	1059.5					0.311464	0.248056	0.132217	0.320451	0.0663605	0.0710406	0.0318443	928.078	838.828					0.229698	0.640056	0.369742	0.101225	0.0479958	0.0821615	0.103902	0.0643875	0.0691701	0.0291159	1162.09	1062.9				39.356	9.332	9.84215	90	101.861	90	3537.55		CUQRIR_clean
CUQROX_clean		1145.81	1023.07					0.160146	0.124489	0.125848	0.162836	0.0640603	0.0680174	0.036855	1074	958.972					-5.53723	8.30909	-4.613	0.540983	0.710663	0.231632	0.546355	0.106213	0.10589	0.108437	1015.88	900.189				38.503	9.451	9.80249	90	100.575	90	3506.46		CUQROX_clean
CUQRUD_clean		1973.85	2001.21					0.381561	0.59006	0.0913542	0.375221	0.0793853	0.0675832	0.12561	1634.5	1657.18					-5.92432	-4.42542	-29.5975	2.3318	2.61831	1.6651	2.33649	0.56114	0.521731	0.715491	0	0				38.028	9.647	9.87125	90	97.4915	90	3590.42		CUQRUD_clean
CUQSAK_clean	n= 1671	1618.87	2406.66												NA	NA		manually	86		2.31626	2.34802	0.0260262	0.3759		0.288908	0.377653	0.0921523	0.0891206	0.133731	NA	NA												CUQSAK_clean
CUQTAL_clean		2270.44	3801.51					0.257762		0.126357	0.259272	0.0536769	0.0533867	0.0626734	2140.43	3583.89					-25.263	-20.8925	-21.0311	3.58116		5.19959	3.56256	0.406693	0.397616	0.688088	0	0				28.912	20.771	29.7285	90	101.223	90	17511.5		CUQTAL_clean
CUQXUI_clean		1325.8	1675.26					1.52486		0.972132	1.53473	0.0885346	0.0844347	0.150034	561.399	709.388					-9.88775	-19.8658	-17.3697	3.26758		3.52396	3.263	0.356587	0.342238	0.57183	0	0				11.403	14.682	22.2644	90	91.0011	90	3726.91		CUQXUI_clean
CURBOH_clean		1602.34	1267.65																		1.42616	1.25843	1.51179	0.147412		0.840173	0.120768	0.0986442	0.0572531	0.367686	1605.51	1324.88												CURBOH_clean
CURQEN_clean		0	0					0.141823		0.573538	0.129831	0.0545034	0.0471326	0.128212	0	0					5.84188	-14.0526	0.448485	0.903188		1.12885	0.89692	0.0919478	0.0841945	0.169481	0	0				10.334	15.971	25.3074	90	93.2778	90	4170.01		CURQEN_clean
CURYOE01_clean		1147.95	1122.58					0.070512		0.000194594	0.0719184	0.0517169	0.0506506	0.0609587	1158.55	1132.97					1.56502	1.56502	-3.80225	0.12661		0.00676632	0.129007	0.0715082	0.0697043	0.0871424	1167.86	1133.28				26.952	26.9519	13.237	90	90	120	8327.23		CURYOE01_clean
CURZAR_clean	occupancy	660.394	495.399			collapse		0.818953	0.379927	2.67086	0.782015	0.45825	0.345793	1.34812	0	0					-16.1443	12.4896	2.42638	2.30775	2.70312	2.15712	2.30135	0.644887	0.528833	1.56323	NA	NA				27.932	14.317	21.448	90	90	90	8577.11		CURZAR_clean
CURZEV_clean		1300.67	1068.63					0.631245	0.89172	0.841566	0.580056	0.135346	0.0671253	0.399134	949.288	779.94					-13.9093	-7.33366	7.10902	1.50238	0.912276	0.836363	1.63162	0.142455	0.119893	0.229694	0	0				11.039	22.784	31.28	90	90	90	7867.31		CURZEV_clean
CUSDIE_charged		1638.38	1605.65					0.187786	0.310249	0.251597	0.169286	0.0685929	0.0559957	0.0979863	1600.3	1568.44					-2.18733	-2.23892	-2.11322	0.253814	0.43121	0.12875	0.250319	0.0888989	0.0747189	0.121986	1582.21	1449.63				18.219	18.219	18.219	109.47	109.471	109.471	4655.44		CUSDIE_charged
CUSXIY_clean	n= 1032	1579.02	5410.47					0.26489	0.398276	0.346904	0.241332	0.211296	0.161235	0.451591	1605.79	5502.22					0.319548	0.306679	0.134465	0.55121	0.505574	0.407096	0.564643	0.210338	0.156891	0.466884	NA	NA				45.846	45.8462	37.11	90	90	120	67550.2		CUSXIY_clean
CUSXOE_clean	n= 1428	1316.33	5398.24												NA	NA															NA	NA												CUSXOE_clean
CUSYAR_clean	n= 1854	1420.4	5745.22												NA	NA					2.42625	2.31727	1.14603	0.592129	0.341282	0.32009	0.6427	0.0606268	0.0564505	0.083671	NA	NA												CUSYAR_clean
CUSYIA_clean		2475.91	3358.06					0.139107		0.0732083	0.142402	0.0356492	0.0375459	0.0261658	2465.99	3344.55					18.3599	-57.7813	-10.769	6.41811		6.44614	6.41671	0.45489	0.361581	0.921436	0	0				12.739	21.714	17.8197	90	101.865	90	4823.88		CUSYIA_clean
CUSZEX_clean		0	0					0.124166		0.0626587	0.127242	0.035133	0.0369795	0.0259002	0	0					7.27077	-43.563	-18.1397	2.2759		3.76312	2.20154	0.339446	0.294491	0.56422	0	0				12.525	8.17	20.9479	90	96.835	90	2128.35		CUSZEX_clean
CUSZIB_clean		2228.88	2968.5					0.107222		0.00615928	0.112276	0.0364611	0.0422537	0.007498	2359.73	3142.64					-53.8973	11.4231	-20.7972	5.68495		5.57264	5.69056	0.73592	0.699184	0.919601	0	0				9.756	11.241	21.596	90	90	90	2368.37		CUSZIB_clean
CUTBEA_clean		1939.18	1852.23					0.768111	0.593162	0.473908	0.835307	0.058867	0.0337428	0.132917	1998.85	1909.17					-2.70795	0.948443	-0.244327	0.287675	0.355294	0.255826	0.268982	0.0711314	0.0343434	0.179559	1972.98	1852.09				31.81	14.993	13.2196	90	96.0095	90	6270.14		CUTBEA_clean
CUTBIE_clean		1956.08	1962.58					1.07825	0.936639	0.250857	1.1621	0.141596	0.0318784	0.464973	1963.57	1969.98					-16.3513	-10.3567	42.8845	4.96856	5.06685	3.54236	5.01038	0.936912	0.49066	2.25218	1693.72	1470				32.118	15.213	13.1784	90	95.255	90	6412.05		CUTBIE_clean
CUTBOK_clean		2001.06	1870.22					0.776573	0.600388	0.482202	0.844147	0.0497731	0.0247999	0.123378	2051.39	1917.18					-3.88984	10.9968	-45.367	2.22114	2.12492	1.69376	2.27638	0.300794	0.138176	0.780089	705.763	329.681				31.649	14.914	13.2654	90	96.4666	90	6221.61		CUTBOK_clean
CUTCAX_clean	occupancy	0	0					2.15304	2.06094	1.6637	2.16957	0.553744	0.531564	0.756533	0	0					16.2925	-10.872	-22.3047	2.48855	1.87987	2.00225	2.51531	0.682379	0.73395	0.210876	NA	NA				7.513	37.157	11.1497	90	98.6454	90	3077.19		CUTCAX_clean
CUTFII_clean	occupancy	0	0					0.754455	0.552912	0.161338	0.77628	0.443576	0.487179	0.051155	0	0					7.47624	-6.23481	-9.99602	2.15426	2.28049	1.15596	2.18168	0.744467	0.783844	0.39008	NA	NA				7.482	36.649	11.0569	90	99.2851	90	2992.16		CUTFII_clean
CUTFON_charged		1211.65	1372.38					0.361932	0.147024	0.20455	0.366092	0.0675354	0.0684741	0.0536562	1264.86	1432.66					-0.839332	-0.839332	-0.42636	0.358233	0.253506	0.202442	0.361819	0.071544	0.0730887	0.0487043	1259.43	1396.66				22.351	22.351	25.378	90	90	90	12678		CUTFON_charged
CUTFUT_charged	n= 1272	1018.32	1021.68												NA	NA					-0.916672	0.220573	-0.566548	0.29802	0.369537	0.168912	0.30028	0.0772742	0.0793488	0.0425528	946.89	938.03												CUTFUT_charged
CUTGEE_clean	metalvsorganic	0	0					1.31575	0.629757	0.149038	1.96754	0.0974209	0.0509755	0.190312	838.875	692.78					-8.98872	-29.9204	-12.3826	5.65985	5.79281	5.64914	5.57299	0.550241	0.594595	0.461534	0	0				10.104	10.81	10.993	90	90	90	1200.7		CUTGEE_clean
CUTGEF_clean		0	0					0.534267	0.829881	0.246628	0.511779	0.207135	0.189675	0.276975	871.204	554.594					-2.94058	-9.04275	-1.28751	1.24466	1.56724	0.80061	1.22976	0.228367	0.236157	0.197207	0	0				19.758	7.228	17.53	90	90	90	2503.47		CUTGEF_clean
CUTGII_clean	metalvsorganic	0	0					1.31665	0.63275	0.144856	1.96789	0.106928	0.0655754	0.189635	734.423	604.888					33.3149	-20.4441	-18.3839	3.01838	2.82883	2.48897	3.23299	0.84358	1.04608	0.438573	686.858	399.514				10.1	10.796	10.982	90	90	90	1197.47		CUTGII_clean
CUVGIK_clean		1207.31	1177.69					0.266544		0.212719	0.26804	0.100129	0.0631558	0.328134	1123.73	1096.26					-9.1821	-5.67576	-2.31235	0.272397		0.176717	0.275054	0.149494	0.146293	0.169236	895.698	740.83				5.566	9.37015	11.7544	94.3232	96.7324	100.839	594.963		CUVGIK_clean
CUVGOQ_clean		1335.91	1333.08					0.230767		0.000336918	0.236528	0.0869853	0.0607999	0.265919	1295.94	1293.12					-9.48854	-2.48318	-1.20991	0.260323		0.0873398	0.264648	0.133358	0.131239	0.147839	1087.69	942.943				5.615	9.33375	13.3397	106.03	93.6103	102.053	651.689		CUVGOQ_clean
CUVHEH_clean		1295.6	782.976																	NUMBER OF ATOM											586.287	196.237												CUVHEH_clean
CUVHIL01_clean		1289.75	776.782																		-28.4064	-7.86738	-7.86504	2.27756	2.46805	3.16934	2.13223	0.672451	0.41343	1.19049	832.276	308.757												CUVHIL01_clean
CUVHIL02_clean_h		1261.16	760.718																		2.32912	-12.636	-12.4846	1.20254	1.59529	1.8037	1.00537	0.222242	0.111491	0.455404	927.349	433.489												CUVHIL02_clean_h
CUVHIL_clean_h		1267.86	764.133																		2.29774	-12.5599	-12.2801	1.18542	1.59263	1.78884	0.982301	0.222158	0.111258	0.455631	926.064	433.969												CUVHIL_clean_h
CUVTUJ_clean		1443.73	1227.99					0.186246	0.280836	0.108894	0.144963	0.0490324	0.0171738	0.0915105	1396.52	1187.85					-6.22167	-2.0824	-2.03415	0.237861	0.369877	0.175038	0.171216	0.0723877	0.0447503	0.109238	1357.5	1038.45				6.82	15.1317	15.1319	62.2156	81.3608	98.6394	1321.86		CUVTUJ_clean
CUVVOG_clean	occupancy	1097.6	914.047					0.478007	0.266189	0.299015	0.497398	0.454369	0.478911	0.0524993	847.477	705.74					-0.95689	-0.958142	6.40732	0.3781	0.125975	0.212098	0.400061	0.234868	0.246996	0.0362623	940.737	817.728				15.968	15.9683	33.649	90	90	119.999	7430.47		CUVVOG_clean
CUVXAT_clean		1407.4	1325.49					0.251203	0.257463	0.0258366	0.255589	0.0663801	0.0551688	0.153828	1322.97	1245.99					-2.29128	-2.27482	-2.01727	0.163902	0.223052	0.1001	0.160119	0.0812167	0.0757848	0.123585	1251.72	1104.17				13.643	19.76	22.1834	77.8889	72.0924	69.8034	5304.61		CUVXAT_clean
CUWHUZ_clean	occupancy	1636.82	1743.52												NA	NA															NA	NA												CUWHUZ_clean
CUWNIT_clean		1532.11	1512.76					0.345598	0.275081	0.245514	0.363991	0.0696493	0.0470531	0.16992	1612.76	1592.36					-6.98793	17.2352	-17.946	1.00336	0.8223	0.717968	1.05204	0.153346	0.139572	0.214469	877.849	770.593				28.834	16.381	23.1986	90	92.8934	90	10943.4		CUWNIT_clean
CUWNOZ_clean		0	0					0.316994	0.293595	0.223728	0.32478	0.0708376	0.0543418	0.153316	0	0					-6.52271	4.67035	-21.7773	0.928129	0.636844	0.482244	0.996454	0.161243	0.151891	0.208004	0	0				15.898	26.422	16.3419	90	116.882	90	6122.75		CUWNOZ_clean
CUWROC_clean		0	0					0.118161		0.0373095	0.12153	0.0805731	0.0825966	0.0552792	0	0					0.544181	-31.6413	-0.536832	3.4395		3.37468	3.4422	0.541845	0.564067	0.264069	0	0				17.237	35.547	9.985	90	90	90	6118.05		CUWROC_clean
CUWTUL_clean		936.098	665.793					0.916382	1.29736	0.991472	0.834969	0.153759	0.0962693	0.350868	0	0					-5.06409	-19.9298	-11.6382	1.76795	1.69924	1.11757	1.80459	0.362778	0.282415	0.63831	0	0				10.416	11.2172	11.8063	93.298	109.634	106.949	1224.15		CUWTUL_clean
CUWVAT_clean		1036.85	779.525					0.829165	1.18404	0.800691	0.741633	0.167817	0.106111	0.364688	1023.41	769.401					4.99312	-1.53884	-12.5996	2.45544	2.12036	1.75879	2.56823	0.632816	0.559753	0.86592	0	0				10.392	11.2942	12.3284	98.4645	109.479	102.789	1291.3		CUWVAT_clean
CUWVEX_clean		0	0					0.992138	0.777301	0.456094	1.04917	0.122392	0.0838705	0.26914	0	0					-13.5387	-8.97816	-3.61338	1.72033	1.38858	0.597518	1.81762	0.2237	0.161917	0.459065	0	0				10.336	11.2397	11.7726	91.9317	108.441	109.728	1206.07		CUWVEX_clean
CUWVIB_clean		0	0					1.08408	1.26144	0.856986	1.05618	0.139113	0.0818247	0.335531	0	0					1.05116	-0.160711	-14.272	1.14937	1.29725	1.38436	1.11197	0.266222	0.175851	0.576067	0	0				10.436	11.2006	11.7344	93.4723	110.055	106.435	1216.76		CUWVIB_clean
CUWWEY_clean		1116.22	825.563					0.565838	0.565818	0.408431	0.570472	0.109693	0.0756901	0.230921	1035.88	766.153					-2.87936	-1.56389	-1.8031	1.52374	0.864037	0.883676	1.67839	0.217034	0.20509	0.259616	0	0				10.391	11.3373	12.8168	106.323	98.7286	103.04	1373.78		CUWWEY_clean
CUWXAV_clean	occupancy	1341.29	1024.9					1.10785	1.72568	0.213272	0.992186	0.731192	0.724128	0.760674	890.45	680.422															NA	NA				28.257	14.688	13.6392	90	99.3249	90	5585.99		CUWXAV_clean
CUWXID_clean		2109.59	2002.8					0.357115	0.320085	0.20283	0.372174	0.0740352	0.0547396	0.139031	1888.17	1792.59					-1.74943	-6.07127	-40.6559	3.50804	3.55989	3.20523	3.5077	0.277824	0.208869	0.510096	0	0				28.735	14.211	14.3324	90	95.1278	90	5829.26		CUWXID_clean
CUWXOJ_clean		0	0					0.293636	0.33337	0.220061	0.289181	0.0648048	0.0497797	0.127767	0	0					-0.466251	-29.5824	-3.37925	2.12962	1.34473	0.995101	2.28756	0.244439	0.245691	0.239193	0	0				29.705	12.97	13.829	90	95.2484	90	5305.61		CUWXOJ_clean
CUWXUP_clean		733.843	524.599					0.80308	0.510591	0.228514	0.873671	0.210038	0.211501	0.204326	0	0					1.30665	8.67636	-40.2152	2.15001	1.29831	0.761113	2.34695	0.373902	0.35215	0.458837	0	0				29.602	13.478	13.3523	90	96.5928	90	5292.02		CUWXUP_clean
CUWYAW_clean		1657.58	1467.85					0.26191	0.292251	0.220773	0.256274	0.0650989	0.0452907	0.131821	1467.72	1299.78					-4.51387	3.20392	-40.3164	6.09481	5.83858	6.34577	6.14627	0.246755	0.164774	0.5229	0	0				29.547	12.969	14.236	90	94.6092	90	5437.52		CUWYAW_clean
CUWYUQ_clean		0	0					0.297627	0.392171	0.262017	0.281517	0.0726337	0.0530927	0.147076	0	0					9.02222	-39.0185	6.50722	1.79401	1.68764	1.63431	1.81819	0.429581	0.355739	0.710882	0	0				29.793	12.793	13.7894	90	95.1843	90	5234.22		CUWYUQ_clean
CUWZAX_clean		2008.23	1797.43					0.613333	0.471159	0.103519	0.670118	0.0873466	0.0608124	0.173932	1704.41	1525.51					-16.7436	-26.9475	-4.68031	2.11183	1.94992	1.19348	2.19058	0.459553	0.371222	0.747792	0	0				29.055	14.115	13.4995	90	97.911	90	5483.61		CUWZAX_clean
CUWZIF_clean		1097.81	883.752					0.98347	0.484838	0.0879485	1.09145	0.0741411	0.0559918	0.148467	0	0					-5.13356	2.22679	-5.24413	1.03221	0.556497	0.198556	1.13466	0.0950855	0.0871844	0.127442	866.181	646.866				13.69	14.7431	15.6517	95.2234	112.946	90.2448	2894.26		CUWZIF_clean
CUXDUU_clean		0	0					0.28118	0.287141	0.254116	0.282566	0.037839	0.0199669	0.0538298	0	0					-7.53369	-8.62652	-15.1348	0.92653	0.987532	0.620249	0.964147	0.262609	0.229599	0.292144	0	0				9.601	9.75743	10.7012	74.2015	75.0094	88.479	930.764		CUXDUU_clean
CUXFIL_clean		1146.13	929.259					0.492862	0.632032	0.35657	0.469507	0.106882	0.0417108	0.343555	848.063	687.585					-3.76944	5.88899	-14.0607	0.53154	0.568246	0.301537	0.536161	0.125567	0.0784313	0.296746	0	0				12.283	13.3856	13.9311	102.139	101.469	95.1305	2173.87		CUXFIL_clean
CUXFUX_clean	occupancy	901.865	681.63					1.41434	0.428827	0.373352	1.52508	0.379503	0.397017	0.131388	0	0					-0.281222	12.9136	-8.78794	0.775095	0.274002	0.461671	0.826602	0.317924	0.329668	0.15155	475.384	379.325				8.975	24.428	12.0085	90	107.795	90	2506.8		CUXFUX_clean
CUXJAI_clean		2117.88	1950.77					0.9535	1.20152	1.09937	0.862722	0.179226	0.0859067	0.414978	2050.09	1888.29					14.7352	-11.9876	-47.9841	5.09258	4.59966	5.39987	5.23982	1.01737	0.818514	1.51976	0	0				10.437	11.2952	12.7856	101.642	111.063	98.4716	1337.18		CUXJAI_clean
CUXJEM_clean		0	0					0.829589	0.925019	0.68671	0.814771	0.140902	0.0833085	0.338366	0	0					-0.158652	-12.1639	-8.88456	2.2824	2.22014	1.64147	2.31738	0.477871	0.348012	0.923102	0	0				10.337	11.1669	11.869	94.2597	107.004	108.417	1221.92		CUXJEM_clean
CUXLEO_clean		0	0					0.165261		0.184446	0.164302	0.0159403	0.0136881	0.0272014	0	0																				9.263	11.089	21.1713	90	100.103	90	2140.94		CUXLEO_clean
CUYHIO_clean		0	0					0.22318	0.373821	0.19899	0.216882	0.0677542	0.0654297	0.0950675	0	0					-2.10405	-1.95537	-2.2269	0.198167	0.449114	0.339089	0.183558	0.0882899	0.0883962	0.0870402	0	0				6.205	17.746	20.4228	90	98.4527	90	2224.41		CUYHIO_clean
CUYQIX_clean		0	0					0.318785	0.691527	0.238165	0.300316	0.0651382	0.0541194	0.192956	0	0					-3.65354	-3.19936	-3.78762	0.285306	0.454714	0.264432	0.276474	0.096069	0.0934674	0.126248	0	0				8.321	13.1115	13.425	71.7168	79.7582	88.055	1368.2		CUYQIX_clean
CUYRUK_clean		0	0																		-4.09815	1.02063	-0.689421	0.162115	0.22952	0.354936	0.149868	0.0730347	0.0649277	0.126743	0	0												CUYRUK_clean
CUYVOI_clean		0	0					0.164139	0.110769	0.167616	0.167525	0.0536077	0.0511729	0.0743039	0	0					-0.927323	-1.50989	-2.04804	0.158563	0.120211	0.183195	0.16027	0.0652908	0.0651274	0.0666801	0	0				8.985	19.114	19.9948	92.3762	102.983	90	3343.08		CUYVOI_clean
CUYWUP_clean		1584.84	1680.88					0.119796	0.119468	0.0351596	0.122615	0.0599749	0.0606156	0.054849	1514.49	1606.22					0.782179	1.20208	0.8606	0.0900101	0.0766992	0.0556138	0.0928836	0.0574838	0.0574851	0.0574737	1587.37	1731.9				10.675	17.844	27.353	90	90	90	5210.33		CUYWUP_clean
CUYYAX_clean		851.348	733.617					2.20986		2.07371	2.21398	0.121217	0.0593094	0.864111	0	0					-0.413765	-0.413765	1.60361	0.278772		1.91634	0.229149	0.115527	0.0578375	0.8078	0	0				9.075	9.075	27.014	90	90	90	2224.75		CUYYAX_clean
CUYYEB_clean		848.925	730.953					2.20602		2.07326	2.21004	0.118816	0.057001	0.8606	0	0					-0.318001	-0.318001	1.54313	0.284637		1.92118	0.235044	0.113342	0.0560519	0.800818	0	0				9.072	9.072	27.01	90	90	90	2222.95		CUYYEB_clean
CUZBUW_clean		0	0					0.503816	0.274713	0.000246132	0.578246	0.113216	0.108256	0.135538	1038.4	933.98					-25.691	11.3249	-15.222	2.15757	2.2445	1.69243	2.17034	0.452625	0.451013	0.459878	0	0				7.876	9.18764	11.3428	112.882	91.0558	105.88	720.086		CUZBUW_clean
CUZFOR_clean		2600.56	2982.99					1.00343	1.21655	0.544891	0.806444	0.157197	0.071731	0.242663	2685.95	3081.02					-37.0692	-19.0494	8.96914	3.91904	3.67518	4.24057	4.246	1.45324	1.21471	1.69177	0	0				8.77	7.25	9.17021	90	97.9984	90	577.393		CUZFOR_clean
DABFET_clean		0	0					0.14394		0.159777	0.143662	0.0684449	0.0655831	0.107556	0	0					-3.87977	-3.87977	-3.87934	0.27439		0.21431	0.275444	0.0997453	0.0959383	0.151774	0	0				23.006	23.006	23.006	90	90	90	12176.5		DABFET_clean
DABFIX_clean		0	0																		-4.99787	-5.32147	-5.23298	0.416075		0.266856	0.418693	0.117916	0.113178	0.182666	0	0												DABFIX_clean
DABGIZ_clean		0	0					0.88023	1.3999	1.10384	0.647813	0.30128	0.0771806	0.577903	0	0					-20.68	-5.11561	2.55197	1.3519	1.55576	1.15689	1.3057	0.412193	0.213165	0.657868	0	0				12.968	16.17	30.9053	90	91.2496	90	6479.07		DABGIZ_clean
DABMUR_clean		2463.13	2875.65					1.20876		0.438725	1.24726	0.0156149	0.0145433	0.0217383	1836.08	2143.55					-2.71053	-2.80842	-1.65918	0.404182		0.421487	0.403317	0.0277694	0.0265885	0.0345176	1991.93	2188.11				21.852	14.161	17.918	90	108.165	90	5268.33		DABMUR_clean
DACFAR_clean		1295.21	1526.94					0.265733		0.0530522	0.268955	0.0719575	0.0672452	0.155601	1327.01	1564.37					1.68777	1.68853	2.95216	0.104859		0.0586789	0.105559	0.0661353	0.0627235	0.126694	1321.54	1658.59				13.088	13.088	26.794	90	90	90	4589.7		DACFAR_clean
DACSEI_clean	occupancy	1584.75	1086.61					0.995741	0.297006	0.100263	1.11479	0.963705	0.999799	0.137565	0	0					-5.95343	-5.10186	13.3553	1.07168	0.481966	0.370199	1.1704	0.969606	1.00689	0.116149	1284.13	881.659				18.554	18.5538	38.822	90	90	120	11573.9		DACSEI_clean
DACXOV_clean		0	0					0.229758	0.155832	0.347562	0.236406	0.0647582	0.0506028	0.147568	0	0					-2.0608	-2.41367	-0.312882	0.216719	0.145066	0.256499	0.224682	0.0810637	0.0691255	0.150902	0	0				10.782	12.1805	12.3374	94.2027	106.306	100.918	1513.14		DACXOV_clean
DACXUB_clean		0	0					0.242032	0.129883	0.267877	0.255237	0.0657306	0.0551333	0.127724	0	0					-1.57101	-1.98468	0.194365	0.222225	0.150844	0.223626	0.230937	0.0793519	0.0702877	0.132378	0	0				10.802	12.1427	12.2451	94.0295	106.643	101.356	1494.94		DACXUB_clean
DACYAI_clean		0	0					0.232103	0.182087	0.342999	0.235964	0.0646055	0.0529822	0.132601	0	0					-2.06046	-2.25767	-0.879768	0.206358	0.153447	0.231878	0.212316	0.0811789	0.0726967	0.1308	0	0				10.876	12.2294	12.333	93.9324	106.676	101.26	1527.52		DACYAI_clean
DACYUE_clean		2564.55	3539.54					1.12274	0.788732	1.26665	1.16532	0.0540898	0.0542674	0.0526251	2124.82	2932.57																				10.762	21.248	15.5667	90	102.88	90	3470.09		DACYUE_clean
DACZUF_clean		592.023	455.212					0.185852	0.3072	0.228718	0.164699	0.0923068	0.0693922	0.158967	564.515	434.067					-6.68794	-4.06706	-13.8371	0.379743	0.402962	0.356078	0.378056	0.121345	0.126177	0.107289	0	0				34.791	10.29	13.6692	90	112.964	90	4505.75		DACZUF_clean
DADLEC_clean		755.258	689.588					0.198379	0.415985	0.15976	0.185964	0.0796886	0.0648701	0.304929	752.47	687.038					-3.18105	-1.76784	-0.784664	0.192186	0.383901	0.063057	0.182668	0.0984118	0.0839067	0.318889	676.129	582.528				37.475	13.327	15.994	90	90	90	7987.87		DADLEC_clean
DADLIG_clean		914.35	871.92					0.32707	0.468385	0.303286	0.316542	0.0771214	0.0620358	0.252761	935.255	891.837					-0.210441	-1.81786	-1.67088	0.284543	0.394446	0.16779	0.278085	0.0880111	0.0752476	0.236615	836.636	764.878				13.02	19.7758	20.8275	61.9326	73.2684	80.1619	4527.69		DADLIG_clean
DADLOM_clean	occupancy	1234.89	2095.26					0.352175	0.547572	0.591641	0.326914	0.0888964	0.0735386	0.22531	1231.66	2089.65					-3.41446	-1.64991	-1.81064	0.221359	0.305599	0.315225	0.210687	0.100839	0.0872418	0.22161	1229.3	1943.23				10.156	37.905	41.217	90	99.8938	90	15631.1		DADLOM_clean
DADNII_clean	metalvsorganic	0	0					1.2348	1.15789	0.889067	1.40777	0.310592	0.19718	0.400655	1057.32	574.809					3.6156	-43.5364	-8.68681	3.29089	3.46637	3.31103	3.06094	1.49865	0.78967	2.06166	0	0				15.524	16.399	12.6432	90	93.074	90	3214.05		DADNII_clean
DADNOO_clean	metalvsorganic	0	0					1.13716	1.06371	0.850888	1.29293	0.311873	0.201378	0.399619	974.615	513.704					-27.3716	-34.2461	8.44273	1.57236	1.53526	0.728952	1.80079	0.71287	0.64367	0.767824	0	0				15.576	16.427	12.4772	90	92.315	90	3189.9		DADNOO_clean
DADNUU_clean	metalvsorganic	0	0					1.1922	1.1123	0.868995	1.36419	0.310122	0.19891	0.398437	1006.23	540.274					-27.4071	-34.0893	7.25879	1.60725	1.56095	0.742039	1.85217	0.705903	0.639105	0.758949	0	0				15.577	16.394	12.5935	90	92.8401	90	3212.04		DADNUU_clean
DADPAC_clean	metalvsorganic	0	0					1.34576	1.25696	0.917672	1.55167	0.288669	0.206551	0.35388	1186.82	647.166					-1.85701	-39.8929	1.99763	2.55201	2.72047	1.55874	2.54826	1.14264	0.844226	1.37962	0	0				15.498	16.4	12.6598	90	93.3601	90	3212.17		DADPAC_clean
DADPEG_clean	metalvsorganic	0	0					1.07502	1.01356	0.827644	1.20705	0.324221	0.195053	0.433207	967.036	504.211					-27.5362	-34.2884	9.10748	1.53792	1.50977	0.724127	1.74848	0.695576	0.635393	0.746355	0	0				15.556	16.543	12.3968	90	91.9045	90	3188.47		DADPEG_clean
DADXUE_clean	occupancy	0	0			collapse		1.16598	0.903545	0.405394	1.2249	1.1437	1.21447	0.450125	0	0					5.03228	1.01305	2.54944	1.04228	0.733242	0.471869	1.10279	1.00267	1.08612	0.184876	0	0				14.141	18.281	21.4597	90	99.3596	90	5473.73		DADXUE_clean
DAFHEZ_clean		0	0					0.40314	0.374291	0.139334	0.429244	0.0868704	0.0470383	0.202745	0	0					-3.31582	-2.65976	-3.73272	0.216037	0.258495	0.0591562	0.211689	0.103166	0.0836935	0.159815	0	0				15.414	11.877	24.154	90	90	90	4421.92		DAFHEZ_clean
DAFHID_clean		0	0					0.195304	0.255511	0.184325	0.175922	0.0732374	0.0455945	0.153653	0	0					-0.894702	-0.13969	-0.0319997	0.190291	0.248725	0.186322	0.171061	0.0750119	0.0478127	0.154137	0	0				15.491	11.669	23.75	90	90	90	4293.16		DAFHID_clean
DAFHOJ_clean		0	0					0.520402	0.410595	0.214957	0.576095	0.0828041	0.0460513	0.189721	0	0					-4.69141	-5.56867	-2.98892	0.19135	0.273149	0.116473	0.168763	0.112241	0.0885663	0.181111	0	0				13.092	14.49	12.6398	90	116.851	90	2139.29		DAFHOJ_clean
DAFJOM_clean		1366.2	1389.67					0.0878632	0.00903293	0.1782	0.0968368	0.0658278	0.0584702	0.100514	1360.94	1384.28					1.8614	1.8614	2.06108	0.0965813	0.0479321	0.19626	0.10055	0.0730557	0.0582908	0.142662	1483.54	1598.45				16.616	16.6161	15.337	90	90	120	3667.13		DAFJOM_clean
DAFSEL_clean		0	0					0.0952172	0.0549674	0.0480733	0.107413	0.0399253	0.046373	0.01874	0	0					-1.45452	0.739755	-5.31127	0.119325	0.0896173	0.0619254	0.13011	0.0551226	0.0589505	0.0425451	0	0				9.121	18.858	8.12661	90	111.96	90	1296.39		DAFSEL_clean
DAFSOV_clean		0	0					0.257377	0.195868	0.0849391	0.283939	0.0491828	0.0534978	0.0350046	0	0					-2.97863	-0.764141	-6.81126	0.128273	0.0863434	0.0602642	0.14247	0.0591265	0.06453	0.0413721	0	0				9.267	19.041	8.29236	90	111.165	90	1364.51		DAFSOV_clean
DAFTEM_clean		0	0					1.73107	0.740056	0.566535	1.85318	0.0768398	0.0448956	0.321746	0	0					1.77982	-1.8937	-4.11446	0.342232	0.218357	0.000666348	0.362162	0.0494216	0.0433376	0.0960658	0	0				9.105	19.38	8.29955	90	111.198	90	1365.4		DAFTEM_clean
DAFTIQ_clean		1655.52	2191.13					1.33798	1.40809	1.73625	1.29513	0.144621	0.0408612	0.511239	1763.29	2333.94					-10.7104	-14.7392	-3.21495	1.48967	1.39505	1.37337	1.51165	0.244692	0.134432	0.634277	1482.21	1395.66				11.083	9.15064	19.4961	93.7268	91.3079	117.618	1745.09		DAFTIQ_clean
DAFYAN_clean		2175.69	2991.34					0.113234	0.0787387	0.231419	0.11519	0.0611798	0.0503951	0.0992437	2162.37	2972.85					0.716333	0.715706	1.63517	0.112088	0.0845186	0.239776	0.111574	0.0663554	0.0511707	0.119948	2181.96	3093.45				15.942	15.9418	16.041	90	90	120	3530.55		DAFYAN_clean
DAFYER_clean		0	0					0.255351	0.0393237	0.105834	0.289277	0.0443878	0.0392756	0.0714093	0	0					2.82731	2.82731	5.01244	0.116448	0.0861995	0.152394	0.11942	0.0694225	0.0568309	0.135978	0	0				16.907	16.906	14.715	90	90	120	3642.49		DAFYER_clean
DAFYOB_clean		2176.94	3099.71					0.0883808	0.0736734	0.262177	0.0815018	0.0422884	0.0382826	0.0583114	2195.46	3125.96					0.336167	0.336167	0.630595	0.0871944	0.0753274	0.266546	0.0791989	0.0434672	0.0372668	0.0682685	2199.79	3174.09				16.212	16.212	16.064	90	90	120	3656.43		DAFYOB_clean
DAGDIZ_clean		0	0					0.40228	0.433818	0.518414	0.382089	0.0884126	0.0554326	0.171731	0	0					-3.52548	-6.69885	-7.64305	0.434137	0.548126	0.524692	0.388594	0.13906	0.13589	0.147066	0	0				11.806	15.267	17.069	90	90	92.4514	3073.74		DAGDIZ_clean
DAGDUL_clean		0	0					0.20933	0.270093	0.385946	0.190372	0.0786893	0.0623846	0.162542	0	0					-2.04237	-4.96376	-4.0742	0.252353	0.386259	0.169946	0.234156	0.101996	0.101281	0.105676	0	0				9.044	16.695	26.523	90	90	90	4004.7		DAGDUL_clean
DAGJED_clean		531.436	467.858					0.500119	0.480874	0.437337	0.502341	0.0593782	0.0526552	0.133331	260.966	229.748					-2.38949	-1.20221	-2.18368	0.219434	0.34548	0.131402	0.214601	0.0785839	0.0761575	0.105274	239.483	198.177				8.945	14.8559	19.8614	91.6425	101.975	93.7553	2573.91		DAGJED_clean
DAHNOQ_clean		0	0					1.27405	1.31695	1.2374	1.19741	0.19465	0.109032	0.248161	0	0					-33.721	19.6344	-40.9395	1.54618	1.64344	1.91324	1.25989	0.879207	0.772437	0.945938	0	0				14.184	11.515	15.6186	90	106.634	90	2444.22		DAHNOQ_clean
DAHNUW_clean		0	0					0.767874	0.78748	0.832583	0.710173	0.272526	0.0701594	0.396786	1197.99	714.423																				10.035	21.204	11.1152	90	92.4544	90	2362.95		DAHNUW_clean
DAHPAE_clean		0	0					0.0712617	0.0753681	0	0.0808644	0.0308173	0.0466492	0.0209225	0	0					-0.607985	-0.607985	0.173714	0.0728618	0.0755328	4.44089e-16	0.0857354	0.0301091	0.0462462	0.0200233	0	0				8.441	8.441	17.5	90	90	90	1246.88		DAHPAE_clean
DAHTIQ_clean	Z>86	0	0												NA	NA															NA	NA												DAHTIQ_clean
DAHWAM_clean		0	0					0.213296	0.359806	0.1315	0.183768	0.0824191	0.0570945	0.152062	0	0					-2.04693	-3.42059	-4.42944	0.275093	0.328557	0.107043	0.269436	0.10444	0.0983508	0.121184	0	0				10.165	22.005	14.1442	91.5517	90	90	3162.63		DAHWAM_clean
DAJBOI_clean	occupancy	0	0												NA	NA															NA	NA												DAJBOI_clean
DAJHOM_manual		0	0					0.177677	0.180128	0.268234	0.174332	0.0380187	0.0240415	0.128235	0	0					-2.02252	-2.21833	-2.72195	0.204462	0.165442	0.224411	0.209	0.0441188	0.0325922	0.118518	0	0				13.172	13.1905	16.2348	97.2915	94.4371	90.5213	2789.01		DAJHOM_manual
DAJHUS_clean		0	0					0.173021	0.156502	0.276455	0.171775	0.0660376	0.0549552	0.137569	0	0					-4.06837	-2.10416	-2.05478	0.242177	0.204822	0.294385	0.245417	0.0876916	0.0817102	0.126299	0	0				12.128	13.1647	13.1641	100.137	106.873	106.873	1845.37		DAJHUS_clean
DAKHUU_clean	occupancy	0	0					1.44931	1.54975	1.5827	1.39517	0.141951	0.0952475	0.242031	0	0					4.43496	-5.29175	-3.58766	0.439313	0.530771	0.70272	0.373113	0.184256	0.109372	0.34472	0	0				8.168	23.616	8.87937	90	110.903	90	1600.06		DAKHUU_clean
DAKVIW_clean		1854.1	1976.8					0.220479	0.29917	0.316584	0.193536	0.0657696	0.0403078	0.178933	1796.43	1915.32					0.566954	-0.60579	-0.402267	0.215682	0.30748	0.308865	0.185493	0.0658681	0.0410799	0.176038	1795.86	1906.2				18.326	19.033	12.529	90	90	90	4370.1		DAKVIW_clean
DAKVOC_clean		1800.47	2210.72					0.0638999	0.0216928	0.23892	0.0634939	0.0524243	0.0449151	0.0857983	1748.19	2146.56					0.172435	-0.190333	0.205175	0.0701712	0.0232096	0.238533	0.0714489	0.0524965	0.0448321	0.0865606	1744.04	2145.44				12.411	26.217	26.221	90	90	90	8531.77		DAKVOC_clean
DAKVUI_clean		1791.37	2170.05					0.0928382	0.0895681	0.17203	0.088503	0.0457004	0.0415152	0.0643012	1754.86	2125.83					1.09783	1.14019	1.06042	0.0726966	0.069468	0.121387	0.0703506	0.0470272	0.0448289	0.0567975	1812.66	2269.07				12.297	26.057	26.084	90	90	90	8357.91		DAKVUI_clean
DAKZUN_clean		1312.23	1217.39					1.41736	2.19745	1.88352	1.30819	0.0798307	0.049395	0.212641	1273.36	1181.3					-10.8121	-11.2302	10.1825	1.11809	1.43006	1.35487	1.07318	0.15453	0.119261	0.308431	1177.18	952.668				7.256	19.359	25.939	90	90	90	3643.62		DAKZUN_clean
DALSAN_clean	metalvsorganic	0	0					0.442234	0.310344	0.366124	0.633553	0.339923	0.396941	0.287655	0	0					-32.7526	1.88873	-3.41876	0.860039	0.893275	0.39566	0.949986	0.465166	0.484196	0.447721	0	0				8.945	14.936	12.4082	90	108.528	90	1571.84		DALSAN_clean
DALSER_clean	metalvsorganic	0	0					0.530044	0.424845	0.372246	0.740442	0.375152	0.427229	0.331754	0	0					-1.03795	-4.17237	-2.30979	0.596406	0.492936	0.371154	0.826695	0.401193	0.449045	0.361317	0	0				14.914	23.507	9.261	90	90	90	3246.75		DALSER_clean
DALSUH_clean		1029.29	763.828					1.84033	1.10468	0.626342	2.03602	0.0667934	0.0425482	0.174165	0	0					-24.2617	-15.941	-16.5169	1.87529	2.00044	1.5457	1.86344	0.32708	0.324961	0.336463	0	0				12.724	13.294	28.598	90	90	90	4837.43		DALSUH_clean
DALTAO_clean		1024.51	786.041					1.83324	1.10744	0.64372	2.02599	0.0681795	0.0408824	0.189066	0	0					-12.8842	-7.4315	-8.3281	1.07527	1.15922	0.659902	1.0751	0.161437	0.161987	0.159003	0	0				12.78	13.358	28.668	90	90	90	4894.06		DALTAO_clean
DALVAQ_clean		0	0					0.562265	0.619416	0.328791	0.56264	0.0836662	0.0315819	0.231238	0	0					-23.4722	2.24451	-22.9633	0.925018	0.979151	0.638101	0.930432	0.255455	0.24379	0.288506	0	0				7.129	16.075	11.037	90	90	90	1264.83		DALVAQ_clean
DALVEU_clean	occupancy	401.224	308.005					0.441172	0.35493	0.382236	0.466233	0.213266	0.225754	0.15083	0	0					-5.51261	-5.51261	-2.75565	0.648471	0.595505	0.389389	0.673553	0.265724	0.291392	0.137385	0	0				12.807	12.807	59.467	90	90	90	9753.73		DALVEU_clean
DALVIY_clean	n= 1200	1927.05	1777.77					0.375271	0.456703	0.275329	0.353679	0.0790289	0.0521301	0.149763	1893.3	1746.67					1.74822	-7.31382	-7.71406	0.857507	0.878988	0.668705	0.860836	0.124464	0.106525	0.171636	1478.9	1187.4				34.967	21.613	41.296	90	90	90	31209.1		DALVIY_clean
DAMDUT_clean		1655.57	1384.27																		1.03447	0.837815	1.17117	0.135253		0.885526	0.106396	0.0940389	0.0499547	0.380586	1674.62	1443.24												DAMDUT_clean
DAMYOI_clean		1937.18	2324.67					0.286693	0.336626	0.220563	0.280919	0.0820645	0.0802151	0.0929848	1911.36	2293.64					0.291552	0.88014	0.472722	0.242308	0.245503	0.236836	0.241974	0.0784979	0.0760683	0.0928443	1923.55	2346.4				30.492	15.986	25.702	90	89.9911	90	12528.3		DAMYOI_clean
DAMYUO_clean		1935.93	2372.13					0.308369	0.388911	0.239434	0.297967	0.0781676	0.0777124	0.08099	1933.36	2368.93					-0.742662	0.913588	-0.258092	0.339403	0.449548	0.288284	0.323933	0.0768645	0.0754848	0.0854185	1922.77	2353.72				30.62	16.09	25.882	90	90.0089	90	12751.4		DAMYUO_clean
DAMZEZ_clean		543.107	366.675					0.123826	0.172289	0.105363	0.118667	0.0595063	0.0598044	0.0573653	482.911	326.034					-3.38958	0.6519	-0.299001	0.128431	0.168888	0.125188	0.123767	0.0686756	0.0689942	0.0663873	0	0				10.342	15.079	25.117	90	90	90	3916.92		DAMZEZ_clean
DANFUW_clean		0	0					0.213701	0.272032	0.234896	0.209854	0.0555083	0.0478331	0.129702	357.304	294.362					-2.93024	-0.494317	-1.87946	0.20446	0.297884	0.239404	0.19828	0.0744905	0.0644813	0.171246	0	0				19.602	23.527	25.922	90	90	90	11954.6		DANFUW_clean
DANROC_clean		0	0					0.208284	0.258766	0.119205	0.206799	0.0703108	0.0657351	0.0991949	0	0					-0.324828	-0.325272	-2.02767	0.17288	0.217944	0.124289	0.170545	0.0720193	0.0690304	0.0908869	0	0				22.535	22.5348	29.635	90	90	119.999	13033.2		DANROC_clean
DANVAQ_clean		0	0																		-14.6884	-14.6884	-14.6884	0.94804	1.21292	1.32834	0.817149	0.473167	0.260594	0.928681	0	0												DANVAQ_clean
DANVEU_clean		0	0																collapse																									DANVEU_clean
DANZAV_charged		1520.18	1399.37					0.154541	0.479191	0.165282	0.103903	0.0681171	0.0455291	0.174532	1665.61	1533.33					0.0405225	-0.710291	-0.678147	0.149721	0.460687	0.14671	0.101733	0.0691423	0.0476656	0.170321	1657.35	1505.14				10.365	28.932	28.932	90	90	90	8676.13		DANZAV_charged
DANZEZ_charged		1180.98	1202.48					0.250063	0.393414	0.16003	0.231337	0.0736783	0.0505501	0.188314	959.038	976.514																				10.372	28.505	28.505	90	90	90	8427.61		DANZEZ_charged
DANZID_charged		1598.23	1653.78					0.152289	0.228675	0.0708713	0.14527	0.0649363	0.0638195	0.0708548	1581.61	1636.61					0.0700413	0.334988	0.336013	0.151949	0.230169	0.0598517	0.145101	0.0645355	0.0630151	0.0725938	1590.41	1657.91				9.994	29.285	29.285	90	90	90	8570.97		DANZID_charged
DANZOJ_neutral		1281.63	1344.56					0.205534	0.310193	0.254732	0.12089	0.103231	0.031963	0.245767	1459.56	1531.25					-2.18321	-1.68978	-1.74773	0.207988	0.355614	0.23954	0.093324	0.121848	0.0526562	0.26023	1501.91	1475.2				18.807	18.8078	18.8073	60	59.9988	59.9997	4703.96		DANZOJ_neutral
DAPBED_clean		1978.25	2401.16															manually	91		-3.55679	-3.28282	-2.93207	0.645254	0.654472	0.570507	0.649988	0.066373	0.0482061	0.114818	1944.55	2137.01												DAPBED_clean
DAPBIH_neutral		1347.84	1363.17					0.112142	0.173546	0.0866612	0.0692742	0.0829298	0.038215	0.172359	1463.11	1479.78					-1.01507	-0.987249	-0.958889	0.128131	0.142606	0.285105	0.0976523	0.100269	0.0400935	0.220619	1401.64	1371.81				18.688	18.6886	18.6883	60.0002	60.0006	60.0011	4615.31		DAPBIH_neutral
DAPHOU_clean	n= 1224	2243.14	2855.23					0.0892824	0.0534103	0.253818	0.0875285	0.0577766	0.0471939	0.0965796	2210.34	2813.5					0.0995618	0.0995618	0.226202	0.085367	0.0495671	0.254677	0.0831911	0.0571586	0.0469838	0.0944665	2214.24	2830.47				38.569	38.569	28.647	90	90	119.999	36905.5		DAPHOU_clean
DAPVUM_clean		0	0					0.106234		0.0759033	0.106595	0.0731959	0.0756861	0.017166	0	0					0.150469	-0.315044	-0.270372	0.100129		0.074095	0.100439	0.0738841	0.0765649	0.0135655	0	0				27.514	14.252	24.0045	90	113.521	90	8630.79		DAPVUM_clean
DAPWAT_clean		0	0					0.10649		0.0746879	0.106869	0.0725227	0.0750247	0.0162289	0	0					0.210179	-0.34311	-0.226942	0.101982		0.0759671	0.102291	0.0734362	0.0761262	0.0129128	0	0				27.881	14.252	24.0592	90	111.798	90	8876.6		DAPWAT_clean
DAPXEZ_clean	metalvsorganic	0	0					0.680328	0.5704	0.539807	0.886257	0.151398	0.110115	0.167018	0	0					-8.61904	-13.2009	-23.3138	2.01024	2.05542	1.6728	2.15143	0.486713	0.275188	0.56675	0	0				9.871	16.509	16.472	90	90	90	2684.28		DAPXEZ_clean
DAPXID_ion_b		1657.3	2166.7																		0.874804	0.882507	-6.50739	0.338566	0.35809	0.520556	0.297121	0.179982	0.059576	0.386392	1607.9	2000.01												DAPXID_ion_b
DAPYAW_clean		1335.97	1247.25					0.220533	0.383758	0.360628	0.195289	0.0725797	0.0566876	0.167932	1297.55	1211.4					-0.951821	-0.856066	-1.42789	0.207784	0.368441	0.298106	0.184336	0.0775752	0.0633428	0.162969	1252.08	1130.47				17.02	19.847	25.0717	75.5503	70.1581	64.6099	7142.77		DAPYAW_clean
DAPZAW_clean	occupancy	0	0					1.3978	1.35583	1.15179	1.43162	0.368427	0.395474	0.313851	0	0					1.2197	-5.23469	-18.5613	1.05459	1.09451	1.32086	1.01831	0.518909	0.468423	0.620782	0	0				16.004	16.0645	19.5316	103.727	100.696	117.94	4043.59		DAPZAW_clean
DARBUU_clean		0	0					0.272857		0.304307	0.261421	0.0870284	0.0166866	0.10901	0	0					-2.33463	-1.00577	-1.73992	0.225552		0.260409	0.212877	0.104292	0.0383642	0.124894	0	0				12.058	17.807	9.78593	90	95.3063	90	2092.2		DARBUU_clean
DARJOX_clean		0	0					0.468561	0.500022	0.399914	0.411367	0.0457749	0.0309779	0.060572	0	0					-0.00606578	1.78296	4.35019	0.343792	0.380071	0.280861	0.261607	0.0721654	0.0299426	0.114388	0	0				8.902	14.28	15.0639	90	95.0691	90	1907.44		DARJOX_clean
DARJUD_clean		0	0					0.159482	0.179483	0.121809	0.117152	0.042303	0.0348929	0.0497131	0	0																				8.885	14.231	15.0492	90	94.9556	90	1895.74		DARJUD_clean
DARNOB_charged		0	0					1.00625	0.455549	0.636171	1.17284	0.0734799	0.0631238	0.103808	0	0					-12.7251	-14.0957	-1.13834	1.11309	0.738378	0.911235	1.22253	0.206386	0.176125	0.295008	0	0				10.641	12.387	18.843	90	90	90	2483.7		DARNOB_charged
DARSEV_SL		1613.04	1757.95					0.58957		0.385488	0.593214	0.0702154	0.0615736	0.155193	1432.59	1561.27					-4.90292	0.485406	0.912622	0.205741		0.154468	0.206657	0.0756463	0.0716006	0.115429	1555.67	1622.4				10.234	19.118	20.9288	67.5547	86.7541	83.6304	3760.78		DARSEV_SL
DARVAW_clean		0	0					0.291427	0.205536	0.105563	0.335546	0.0690217	0.0443097	0.130802	0	0					-14.1673	-0.270237	-1.29669	0.487485	0.521149	0.202449	0.500017	0.180556	0.141788	0.277476	0	0				9.133	13.84	9.08475	90	117.394	90	1019.55		DARVAW_clean
DATHAJ_clean		0	0					0.331724	0.356106	0.266044	0.325966	0.0763683	0.0467064	0.124675	489.215	259.864					-8.43167	-5.63196	3.15936	0.399175	0.416781	0.342764	0.395658	0.119835	0.0943773	0.161294	0	0				12.61	13.008	22.501	90	90	90	3690.86		DATHAJ_clean
DATPIY_clean		0	0					1.02894	0.939059	0.892927	1.09088	0.079903	0.0274959	0.151776	0	0					6.6611	-14.5408	-12.6431	1.61778	1.61983	1.86928	1.58531	0.398669	0.19775	0.674215	0	0				16.176	16.4732	16.4732	76.0509	60.5951	60.5951	3331.46		DATPIY_clean
DAWBIO_clean		660.155	469.981					0.731496	0.786468	0.697046	0.71814	0.0875417	0.0592891	0.193489	736.88	524.603					-4.21073	-1.73693	-1.2919	0.401171	0.399903	0.309654	0.406608	0.0954703	0.0796133	0.154934	618.666	409.214				6.62	26.282	7.667	90	90	90	1333.96		DAWBIO_clean
DAWBOU_clean		711.867	506.982					0.359327	0.384967	0.237495	0.358974	0.0884691	0.0628491	0.184544	734.032	522.749					-2.45437	-0.211236	0.44888	0.270513	0.312516	0.133201	0.266475	0.0940372	0.0702384	0.183283	701.988	488.828				6.64	26.179	7.67	90	90	90	1333.27		DAWBOU_clean
DAWBUA_clean		704.713	527.076					0.670455	0.743372	0.652472	0.652213	0.0891118	0.0624481	0.193545	817.354	611.326					-3.69795	-2.48663	-2.05488	0.326265	0.297092	0.19182	0.341019	0.0997573	0.087146	0.149151	664.787	457.326				6.7	27.133	7.682	90	90	90	1396.52		DAWBUA_clean
DAWCAH_clean		783.676	579.079					0.338155	0.34327	0.166228	0.345858	0.0906118	0.0671152	0.18264	813.902	601.479					-2.09779	-0.740461	0.576221	0.280243	0.293468	0.0841552	0.287083	0.0961514	0.0748316	0.179654	747.241	539.658				6.686	26.997	7.638	90	90	90	1378.67		DAWCAH_clean
DAWCIP_clean		1611.48	1619.05					0.192799	0.208205	0.178878	0.190734	0.0537176	0.0552529	0.0454656	1553.83	1561.13					-1.31837	-0.895261	0.400409	0.171815	0.191515	0.12758	0.170684	0.0574624	0.0603749	0.0418083	1488.15	1468.07				16.748	24.518	33.291	90	90	90	13670.2		DAWCIP_clean
DAWCOV_clean		1450.55	1484.95					0.434694	0.478182	0.436495	0.427161	0.0854081	0.0597056	0.208209	1172.67	1200.46					-1.01461	-1.81413	-8.32137	0.616145	0.476603	0.232016	0.656529	0.115958	0.110012	0.144366	509.06	452.073				13.552	16.3329	17.3467	67.2923	67.0068	65.489	3098.89		DAWCOV_clean
DAWDAI_clean		0	0					0.385498	0.515862	0.299614	0.370979	0.0901692	0.0596099	0.226413	0	0					-13.9232	-0.101363	1.59749	0.63995	0.624472	0.096911	0.660115	0.152686	0.139514	0.21141	0	0				9.43	13.319	23.2243	94.5838	90	90	2907.6		DAWDAI_clean
DAWVII_clean		1533.32	1464.31					0.427443	0.633463	0.212744	0.439563	0.0798303	0.0489919	0.172346	1550.13	1480.32					-3.78431	-6.3547	0.742869	0.380459	0.666573	0.22705	0.386033	0.0806865	0.050346	0.171708	1459.42	1299.01				11.841	13.8366	14.269	99.4257	91.9639	110.705	2146.52		DAWVII_clean
DAWVOO_clean		0	0					0.438846		0.332657	0.445925	0.0755045	0.0621243	0.13304	0	0					1.61049	-3.41745	3.08369	0.440473		0.379305	0.444551	0.0789603	0.0670504	0.130173	0	0				14.294	14.8561	23.1086	92.7881	91.5672	109.889	4603.99		DAWVOO_clean
DAWWAB_clean		1125.39	698.187					0.77092		0.996575	0.741566	0.248804	0.0759984	0.574943	990.171	614.293					4.03025	0.427958	-1.33179	0.424009		0.735554	0.383483	0.253541	0.0806792	0.579786	1039.37	660.815				24.001	17.455	11.676	90	105.097	90	4722.69		DAWWAB_clean
DAWWEF_clean		1934.44	1794.84					0.63424	0.728966	0.661657	0.609532	0.0563828	0.0337609	0.130712	1904.45	1767.05					-5.70151	-5.70151	-1.30371	0.341109	0.378522	0.277819	0.33789	0.0930036	0.0869112	0.113022	1855.81	1511.16				12.588	12.588	25.09	90	90	90	3975.7		DAWWEF_clean
DAWWIJ_clean		0	0					1.06262	0.74347	0.704876	1.16928	0.086913	0.0322432	0.266542	0	0					-8.38948	-2.20131	-7.43506	0.62011	0.415222	0.243066	0.701587	0.126707	0.115869	0.162315	0	0				12.17	13.601	17.4	90	90	90	2880.12		DAWWIJ_clean
DAXGUG_clean		0	0					0.981148	0.895181	0.299935	1.02215	0.0868693	0.0463308	0.390908	0	0					-1.48323	-1.00227	-2.09568	0.129004	0.104534	0.0837923	0.134728	0.0498104	0.0541671	0.0171351	0	0				7.545	9.68511	13.9433	81.6775	76.8758	80.7069	973.047		DAXGUG_clean
DAXHIV01_clean		1863.56	2110.4					0.24047	0.0916766	0.265837	0.248842	0.0802279	0.0612919	0.164257	1904.85	2157.09					-14.3229	-12.0071	-5.45735	0.454569	0.553464	0.301954	0.455573	0.177202	0.192811	0.107934	1062.67	913.967				12.011	12.1018	13.679	98.6829	116.044	69.8895	1677.49		DAXHIV01_clean
DAXHIV_clean		1880.28	2131.69					0.230021	0.104176	0.257457	0.236813	0.0875068	0.0682473	0.172971	1920.58	2177.39					-2.09803	-4.437	-4.07465	0.265926	0.153175	0.112822	0.280608	0.108404	0.0945537	0.169862	1638.55	1649.05				12.078	12.087	13.6846	98.8821	116.187	69.52	1679.41		DAXHIV_clean
DAXHUH01_clean		1876.39	2107.75					0.266473	0.224436	0.255517	0.269716	0.0641657	0.0487165	0.132721	1910.68	2146.23																				11.95	12.1139	13.6683	63.6957	81.1706	69.734	1663.95		DAXHUH01_clean
DAXHUH_clean		1919.7	2190.11					0.212411	0.0996836	0.255498	0.217599	0.0840154	0.0666304	0.161162	1934.45	2206.83																				12.106	12.1176	13.7204	98.9624	116.178	69.3217	1689.91		DAXHUH_clean
DAXJET01_clean		0	0					0.618253		0.250865	0.625907	0.278142	0.286389	0.179189	0	0					1.04249	2.33049	-0.59352	0.617211		0.307459	0.623665	0.289522	0.296211	0.209258	0	0				22.648	22.6473	7.447	90	90	120.001	3307.91		DAXJET01_clean
DAXJET02_clean		0	0					0.542584		0.131171	0.551155	0.292427	0.303758	0.156454	0	0					-2.82609	-0.595593	-1.54248	0.955713		0.460417	0.966031	0.321437	0.330023	0.218397	0	0				22.65	22.6496	7.451	90	90	120.001	3310.32		DAXJET02_clean
DAXJET03_clean		0	0					0.52754		0.221534	0.533915	0.285899	0.294752	0.179672	0	0					-1.83025	-0.0401236	-2.00662	0.665978		0.33158	0.672945	0.304572	0.314361	0.187105	0	0				22.68	22.6796	7.497	90	90	120.001	3339.58		DAXJET03_clean
DAXJET_clean		0	0					0.6497		0.225973	0.658527	0.28318	0.292575	0.170438	0	0					-1.52499	0.477672	-0.202263	0.545583		0.186005	0.553075	0.279945	0.291121	0.145833	0	0				22.505	22.5048	7.372	90	90	119.999	3233.51		DAXJET_clean
DAXKIY_clean		0	0					0.182585	0.0828198	0	0.20682	0.043191	0.0375724	0.0628563	0	0					-31.8659	-18.7027	8.35304	0.900256	0.902992	0.0489631	0.93527	0.351747	0.327785	0.435615	0	0				9.159	9.159	24.445	90	90	90	2050.62		DAXKIY_clean
DAXKOE_charged		0	0					0.39077	0.205859	0.288744	0.425839	0.0541298	0.0383699	0.109289	0	0					-18.5624	-18.5706	-10.5075	1.21765	1.59157	0.881098	1.16935	0.375002	0.322864	0.557485	0	0				10.115	10.1145	11.4667	98.9206	98.9201	115.278	1015.32		DAXKOE_charged
DAXNOG_clean		1106.82	869.318					0.0649647	0.0120592	0.224496	0.0693056	0.0494921	0.0420559	0.0759315	1104.95	867.762					-0.098886	-0.00938212	-0.00703659	0.0672406	0.0155891	0.223807	0.0714106	0.0502587	0.0427196	0.0770642	1107.08	868.609				7.989	8.95267	8.95282	103.085	100.061	100.061	598.595		DAXNOG_clean
DAYCAI_clean	occupancy	0	0			collapse		2.59605	2.4381	2.58423	2.71648	2.14001	2.40848	1.48104	0	0															NA	NA				10.235	10.2341	7.08	90	90	120	642.246		DAYCAI_clean
DAZCAK_clean	occupancy	1240.39	1210.65												NA	NA															NA	NA												DAZCAK_clean
DEBGIA_clean		0	0					1.37219	0.58218	0.749818	1.45077	0.0451328	0.043482	0.0569242	0	0					-30.8046	2.64111	-0.0438413	1.01893	1.28079	0.511917	1.02389	0.0966016	0.087085	0.164577	0	0				10.101	15.679	19.1598	96.4099	90	90	3015.44		DEBGIA_clean
DEBNUU_clean	metalvsorganic	0	0			collapse		4.53681	4.79953	5.04981	3.91751	2.45858	2.40497	2.51219	0	0					-24.0688	8.87373	-7.54549	4.50792	4.6572	4.907	4.1157	2.57931	2.48913	2.6695	0	0				7.895	10.541	10.3266	109.818	90	90	808.494		DEBNUU_clean
DEBWAK_clean		1024.54	971.907					0.0928382	0.0984731	0.0760916	0.0929326	0.0617199	0.0620237	0.0569352	1023.56	970.946					-0.740131	-0.740131	0.968979	0.094402	0.220342	0.146264	0.089165	0.0603943	0.0599787	0.0669395	1029.33	971.387				16.402	16.4024	25.47	90	90	119.999	5934.28		DEBWAK_clean
DEFKUU_clean		1295.89	757.32					0.664071	0.982892	0.338579	0.525839	0.108222	0.0643615	0.195944	1053.52	615.688					3.15591	3.53323	-3.42382	0.219714	0.292942	0.228566	0.172288	0.0854542	0.0604625	0.135438	1123.77	674.18				5.022	12.34	15.4392	90	91.867	90	956.282		DEFKUU_clean
DEFRIR_clean		0	0					0.688583	0.755386	0.843558	0.648883	0.0722568	0.0375074	0.166577	0	0					-24.56	11.4433	-38.2824	1.56091	1.82556	0.715358	1.50788	0.43379	0.301603	0.792585	0	0				10.538	17.6679	20.005	90	90	91.2065	3723.79		DEFRIR_clean
DEGJIK_clean		330.73	208.452					0.122465		0.0578348	0.126774	0.0452704	0.0424531	0.0565396	0	0					-2.23407	-5.18887	3.2109	0.137939		0.107122	0.139993	0.0583029	0.051506	0.0854907	0	0				5.814	8.96672	16.88	90	90	94.0802	877.766		DEGJIK_clean
DEGPEL_charged		1396.24	977.964					0.134655	0.00128427	0.102843	0.14555	0.0563944	0.0440781	0.0810271	1335.49	935.392					0.614801	0.860949	-0.521356	0.571119	0.322965	0.3715	0.611453	0.0675269	0.0446782	0.113224	0	0				17.55	17.5502	17.5503	60.0016	60.0006	60.0004	3822.41		DEGPEL_charged
DEHBIC_clean		0	0					0.323389	0.224872	0.406174	0.377646	0.0951635	0.0537619	0.168557	0	0					-5.231	-19.4717	0.277715	1.15004	0.97575	0.782548	1.28556	0.280513	0.227241	0.374949	0	0				6.026	7.44959	13.2867	102.742	101.461	90.723	569.172		DEHBIC_clean
DEHFUR_clean		0	0					3.80922	3.98669	4.0257	3.75162	0.176174	0.0945977	0.482085	0	0					-5.85963	-5.99248	-11.4299	0.838531	0.972128	1.62068	0.747535	0.170562	0.13446	0.305942	0	0				11.441	11.4406	46.83	90	90	119.998	5308.56		DEHFUR_clean
DEJCEB_clean		0	0					0.270252	0.510673	0.0609573	0.255574	0.0497198	0.0471872	0.0645534	0	0					-3.24715	0.0878355	-12.3966	0.98407	1.05718	0.681273	0.992534	0.121428	0.125771	0.0959911	0	0				14.04	14.345	27.756	90	90	90	5590.16		DEJCEB_clean
DEJCIF_clean		1017.41	741.019					0.633862	0.74005	0.652728	0.605742	0.0576286	0.0342119	0.127879	0	0					0.787203	-0.959105	-2.8051	0.323255	0.608996	0.327935	0.251429	0.0904238	0.0773344	0.129692	909.617	639.23				7.336	10.75	14.0283	90	90.776	90	1106.2		DEJCIF_clean
DEJJIN_clean		1490.53	1288.89					0.327909	0.210025	0.256635	0.368598	0.0398612	0.0352027	0.0558333	1503.14	1299.77					0.9516	-2.95114	-3.52012	0.24865	0.173916	0.20786	0.27404	0.0500649	0.0553192	0.0320499	1369.39	1102.1				18.779	17.827	14.36	90	93.8252	90	4796.63		DEJJIN_clean
DEJRUH_clean		913.699	886.701					0.773712		0.605835	0.784204	0.0597529	0.0536628	0.0841135	0	0					-2.62569	0.727326	-5.0717	0.242906		0.187066	0.246396	0.0770018	0.0740481	0.0888163	0	0				8.378	14.9585	17.572	90	90	98.3489	2178.83		DEJRUH_clean
DEKHEH_clean		1043.23	974.387					0.341152	0.410363	0.255271	0.336711	0.0754712	0.0576593	0.220935	1187.92	1109.54					-1.03005	-3.82047	-2.36284	0.187363	0.264492	0.126802	0.181597	0.0902464	0.0851291	0.132038	0	0				9.317	11.742	13.2511	90	90.1946	90	1449.66		DEKHEH_clean
DEKHUX_clean		1159.3	1101.99					0.203628	0.282836	0.000302003	0.200475	0.0727471	0.0650372	0.125432	1072.47	1019.41					-5.89867	-0.690949	-5.16725	0.269752	0.216804	0.0884688	0.280671	0.104614	0.100296	0.134124	878.447	745.569				10.224	11.7226	12.2268	65.9799	71.3053	84.6206	1266.74		DEKHUX_clean
DEKPEP_clean		0	0					0.210932	0.140395	0.130711	0.262699	0.0837981	0.089453	0.0737736	0	0					-0.465744	3.44693	-4.15184	0.322487	0.255097	0.231419	0.374005	0.124592	0.123866	0.12588	0	0				8.67	9.74168	10.4061	81.4408	65.8283	67.1621	738.931		DEKPEP_clean
DEKPUF_clean	occupancy	1537.3	992.21					0.499993	0.570385	0.415991	0.406887	0.134665	0.174636	0.0747083	1410.03	910.062					4.1384	-52.3642	-13.4531	2.89788	3.00667	2.22635	2.97068	1.37893	1.2415	1.58509	0	0				22.139	13.661	10.481	90	90.0601	90	3169.88		DEKPUF_clean
DELGEI_manual		2270.27	3786.56			collapse		0.838067		1.69865	0.821518	0.0910873	0.0202075	1.0834	2162.5	3607.07					-0.817991	-0.817991	-0.817991	0.173965		0.00524491	0.17721	0.0252779	0.0204966	0.092216	2233.15	3634.36				16.382	16.382	16.382	90.8919	90.8919	90.8919	4394.82		DELGEI_manual
DELTAQ03_clean		0	0					0.338734		0.00665506	0.355337	0.0833616	0.070299	0.220519	0	0					11.2689	14.0144	-31.4279	0.86945		1.51119	0.837363	0.165315	0.108078	0.766302	0	0				7.976	7.976	17.753	90	90	90	1129.39		DELTAQ03_clean
DELTAQ_clean		0	0					0.814629		2.16141	0.74729	0.128651	0.0630358	0.817615	0	0					12.5697	10.056	-29.3291	0.757818		1.5554	0.717939	0.159541	0.103895	0.743826	0	0				7.969	7.969	17.721	90	90	90	1125.37		DELTAQ_clean
DEMLAJ_clean	occupancy	0	0					0.79119		0.543217	0.815266	0.442873	0.534284	0.151345	0	0					-3.38508	2.8259	1.92584	0.688397		0.621562	0.694886	0.447943	0.540665	0.152234	0	0				21.533	16.444	14.8193	90	92.5178	90	5242.28		DEMLAJ_clean
DEPJIR01_clean		0	0					0.599659	0.654382	0.657436	0.535306	0.0605672	0.066346	0.051899	0	0					-8.91649	-7.36421	-3.64748	0.23736	0.307873	0.0980663	0.190062	0.101503	0.128371	0.0612009	0	0				8.717	11.617	8.289	90	90	90	839.389		DEPJIR01_clean
DEPJIR_clean		0	0					1.58402	1.23251	0.215177	1.93088	0.272612	0.191876	0.393716	0	0					-19.4825	1.33876	-16.5938	1.88043	1.63166	1.59021	2.04109	0.616813	0.44921	0.868216	0	0				11.617	8.717	8.289	90	90	90	839.389		DEPJIR_clean
DEPSEW_clean	metalvsorganic	0	0					0.200458	0.223044	0.160832	0.149743	0.0290844	0.0245492	0.0336195	0	0					-20.3557	-2.59062	-14.2719	1.10222	1.14744	1.00157	1.02202	0.259832	0.260862	0.258801	0	0				14.365	16.305	8.73407	90	90.2427	90	2045.69		DEPSEW_clean
DEPTOH_clean	metalvsorganic	0	0					0.195706	0.217766	0.158186	0.144987	0.031491	0.0258851	0.0370968	0	0					-20.0929	-2.76132	-14.3998	1.09695	1.14186	0.994693	1.01955	0.258118	0.26162	0.254617	0	0				14.323	16.34	8.751	90	90	90	2048.06		DEPTOH_clean
DEPXAY_clean		1415.91	1323.19					0.359698	0.511544	0.325951	0.338934	0.0466323	0.0380043	0.0897722	1694.87	1583.88					-0.937676	-3.25258	-8.64059	0.446322	0.665042	0.231038	0.429233	0.0984685	0.104394	0.0688388	0	0				14.216	14.447	27.865	90	90	90	5722.87		DEPXAY_clean
DEPXIG_clean		1161.24	956.119					0.684163	0.684995	0.623215	0.689103	0.108402	0.0478664	0.275765	1238.45	1019.66					-4.54047	-5.70041	-3.9253	0.255536	0.301444	0.179546	0.24631	0.12173	0.0963646	0.191856	0	0				11.849	17.711	18.9027	114.861	90	90	3599.27		DEPXIG_clean
DEPXOM_clean		2045.73	1894.47					0.602281	0.654944	0.646747	0.570392	0.104941	0.0352121	0.26183	2007.73	1859.32					-3.2254	-7.4793	-3.1181	0.307676	0.365096	0.315542	0.277982	0.120617	0.0802866	0.211361	1736.61	1429.03				11.797	17.876	18.8484	116.35	90	90	3561.83		DEPXOM_clean
DEPXUS_clean		0	0					0.474248	0.530965	0.514898	0.454354	0.0867035	0.05243	0.171642	0	0					-4.51936	-1.36692	0.836955	0.441104	0.500406	0.473658	0.420756	0.0903127	0.0684805	0.144418	0	0				26.406	14.441	25.3773	90	113.332	90	8885.76		DEPXUS_clean
DEPYAZ_clean		0	0					0.426065	0.467959	0.471015	0.410692	0.0875468	0.0542549	0.170053	0	0					-5.72209	-2.30487	-0.578355	0.427082	0.471291	0.465273	0.41128	0.0986603	0.0838328	0.135407	0	0				26.494	14.521	25.6071	90	114.286	90	8979.72		DEPYAZ_clean
DEPYED_clean		0	0					0.194648	0.247545	0.225805	0.177206	0.0720587	0.050093	0.130634	0	0					-3.38063	-0.730028	-4.40308	0.346527	0.384158	0.260797	0.339138	0.0922356	0.0764367	0.134366	0	0				26.38	14.438	25.423	90	113.632	90	8870.95		DEPYED_clean
DEQFOU_clean		277.275	206.954					0.740487	0.880941	0.531824	0.740311	0.0695671	0.0416276	0.158624	0	0					-9.93281	-15.4376	-1.92121	0.835458	1.3227	0.67284	0.786046	0.184777	0.133463	0.348341	0	0				8.29	13.8221	17.0677	77.1894	75.9448	72.5495	1786.26		DEQFOU_clean
DEQVIF_clean		1182.75	1073.72					0.26197	0.309092	0.183409	0.259222	0.0851237	0.0702398	0.196753	1030.63	935.638					-4.43521	-2.22299	-4.31926	0.293224	0.226763	0.0596234	0.30571	0.106701	0.103421	0.1313	920.874	747.763				9.871	11.5071	23.254	90	90	96.4166	2624.8		DEQVIF_clean
DEWQUS_clean	metalvsorganic	1276.49	724.944					1.1225	1.04937	0.720431	1.27693	0.200094	0.103665	0.283068	0	0					3.18984	-8.52344	-7.40416	1.04519	1.08537	0.747229	1.09454	0.223321	0.152153	0.284559	0	0				27.644	16.017	22.902	90	90	90	10140.4		DEWQUS_clean
DEWRIH_clean	metalvsorganic	685.611	292.945					1.14237	1.22584	0.830379	1.17053	0.228784	0.0651532	0.3576	0	0					-26.2699	-23.6078	7.78881	1.77803	2.06987	1.69146	1.54816	0.616386	0.303542	0.862667	0	0				12.806	13.809	14.508	113.569	96.7093	106.21	2180.67		DEWRIH_clean
DEXDER_clean		0	0					0.34853	0.341798	0.239885	0.435549	0.0944481	0.0292482	0.13096	0	0																				9.361	9.92109	10.0149	85.0283	85.8084	65.0881	839.695		DEXDER_clean
DEXZIR_clean		0	0																																									DEXZIR_clean
DEYJIC_clean		888.396	703.732					0.345938	0.404821	0.336142	0.334896	0.103001	0.0656186	0.165306	0	0					-0.728278	-3.82345	-2.85725	0.420742	0.348273	0.286273	0.452648	0.122211	0.105882	0.149428	0	0				7.709	11.4011	13.4985	96.3938	105.618	99.3384	1112.34		DEYJIC_clean
DEYJOI_clean		0	0					0.352998	0.320974	0.304614	0.365718	0.092229	0.0698839	0.129471	0	0					-3.10451	-6.12815	-3.74362	0.345222	0.249803	0.236397	0.378703	0.117315	0.113144	0.124267	0	0				7.774	11.4633	13.5383	96.8021	105.711	99.2265	1129.62		DEYJOI_clean
DEYLOJ_clean	occupancy	883.589	234.668												NA	NA		manually	15		-27.1244	-28.6108	-26.5782	7.91376	7.94147	7.9113	7.75465	1.29708	1.07877	1.32427	NA	NA												DEYLOJ_clean
DEYLUQ_clean		806.501	497.87																		-3.01172	-3.6799	-3.86855	0.174123	0.247758	0.184483	0.169941	0.0713964	0.0703449	0.0823328	704.217	391.432												DEYLUQ_clean
DEYNIG_clean		90.9151	37.5775																																									DEYNIG_clean
DEYXIQ_clean		0	0					0.355497	0.445644	0.230124	0.34643	0.0594393	0.0452378	0.126896	0	0																				7.903	10.5378	32.858	90	90	99.6089	2698.03		DEYXIQ_clean
DEZCER_clean		0	0					1.80075	1.73757	1.80237	1.80771	0.161065	0.0771682	0.656057	979.815	1041.87					-10.0284	-0.952858	-5.38494	0.289025	0.277567	0.185224	0.294143	0.148399	0.147467	0.153897	0	0				10.127	15.385	27.6552	90	92.7213	90	4303.93		DEZCER_clean
DEZKAW_clean		1382.59	1517.12					0.350191		0.291903	0.352966	0.0808723	0.0409167	0.28065	1524	1672.22					-10.2873	-10.2669	-10.1456	0.526921		0.472991	0.529489	0.172263	0.182859	0.119285	0	0				17.145	17.145	17.1455	108.652	109.882	109.883	3879.14		DEZKAW_clean
DEZKEA_clean		0	0					0.594689		0.541326	0.59723	0.0833278	0.0431574	0.28418	0	0					-8.8622	-12.4025	-2.01479	0.46413		0.351115	0.469512	0.155618	0.154787	0.159775	0	0				12.946	23.746	15.957	90	90	90	4905.43		DEZKEA_clean
DEZNED_clean		1763.78	1636.31					1.41019		1.13853	1.43108	0.0822997	0.065938	0.200922	1668.41	1547.83					2.72453	-6.40686	-6.97531	0.492687		0.831451	0.466628	0.1355	0.116133	0.275903	1419.53	1182.58				10.611	11.5033	20.693	90	90	95.5674	2513.9		DEZNED_clean
DIBJEF_clean		413.336	233.578					0.169597	0.303733	0.308121	0.140929	0.0809933	0.0442024	0.1973	425.471	240.443					-5.03388	-1.22001	-2.86167	0.252472	0.403189	0.366808	0.221809	0.107699	0.0722415	0.219789	270.18	139.667				9.15	23.4261	26.8478	76.7528	80.1886	78.738	5446		DIBJEF_clean
DIBJIJ_clean		586.933	382.266					0.796321	0.865158	0.779003	0.789557	0.101654	0.0461542	0.273201	811.575	528.553					-19.9854	-0.642792	-3.92197	0.8862	1.08713	1.22489	0.853336	0.182882	0.121832	0.371582	0	0				10.994	24.2064	26.6503	67.578	78.0965	76.8743	6328.21		DIBJIJ_clean
DIBPAH_clean		0	0			collapse		2.81957	2.1183	2.498	2.90344	1.01472	1.01423	1.01749	1719.87	1477.02		manually	5		-30.0706	-14.5029	-38.6922	9.00964	9.2131	9.21809	8.98318	0.823542	0.79616	0.980371	0	0				16.143	7.751	27.3744	90	93.0762	90	3420.27		DIBPAH_clean
DIBPIP_clean		0	0					0.290206	0.29931	0.000461165	0.296935	0.0611944	0.0511632	0.152478	0	0					-1.76883	-2.62323	-1.95571	0.346409	0.38946	0.00395997	0.351878	0.0830545	0.0782515	0.126762	0	0				10.758	15.0996	18.1366	68.3859	72.7475	69.1309	2512.5		DIBPIP_clean
DIBQEM_clean		0	0					0.233451	0.356884	0.332885	0.201674	0.092926	0.0701987	0.175462	1555.87	1923.48					-2.79294	-2.79251	-2.79421	0.243046	0.331709	0.302313	0.220872	0.106005	0.0870358	0.174894	0	0				23.599	23.5985	23.5982	109.471	109.471	109.471	10116.7		DIBQEM_clean
DIBQIQ_clean		2035.38	2617.66					0.260264	0.318879	0.360601	0.247609	0.0729146	0.0594164	0.153904	1960.27	2521.06					-3.28442	0.132182	-4.03559	0.227118	0.360556	0.258121	0.205359	0.0953951	0.0865763	0.148308	1701.88	2034.12				17.446	18.762	27.758	90	90	90	9085.8		DIBQIQ_clean
DIBQOW_clean		1979.6	2604.34					0.150464	0.209366	0.223293	0.138747	0.0841221	0.0777718	0.122224	1921.95	2528.44					-2.61036	-0.832838	-2.33988	0.174277	0.222885	0.201568	0.16578	0.0982	0.0934825	0.126505	1757.42	2180.7				17.561	20.88	25.347	90	90	90	9294.08		DIBQOW_clean
DIBQUC_clean		1988.52	2635.44					0.146065	0.191611	0.242146	0.135585	0.0870879	0.0805061	0.126579	1941.47	2573.08					-2.81257	-2.38987	-1.09375	0.176378	0.221098	0.211051	0.168219	0.0981193	0.0931579	0.127888	1755.63	2183.15				17.564	25.629	20.8	90	90	90	9363.07		DIBQUC_clean
DIBWUH_clean		0	0					0.362704	0.354877	0.0883947	0.394052	0.114282	0.0674427	0.189225	0	0					-1.14343	-1.14415	-2.35657	0.294791	0.25609	0.160726	0.313987	0.109418	0.07581	0.16319	0	0				13.932	13.932	17.7465	113.112	113.112	90	2865.12		DIBWUH_clean
DIBWUI_clean		0	0					0.655023	0.690059	0.0750869	0.685354	0.082041	0.0427062	0.165206	0	0					-9.30941	-15.5081	2.06701	0.70853	0.753451	0.214463	0.730211	0.150089	0.10634	0.242585	0	0				10.672	10.7194	11.9346	70.3421	77.9281	60.8525	1121.2		DIBWUI_clean
DIBXAO_clean		0	0				NUMBER OF ATOM								0	0				NUMBER OF ATOM											0	0				14.053	14.053	17.9025	66.8889	66.8889	90	2940.78		DIBXAO_clean
DIBXAP_clean		0	0					0.654597	0.691268	0.0784724	0.684214	0.078698	0.0419711	0.156349	0	0					-4.94971	-5.74115	2.9755	0.346007	0.41497	0.0663584	0.346269	0.101014	0.0715944	0.163217	0	0				10.639	10.6984	11.9377	70.0804	77.612	60.8018	1113.21		DIBXAP_clean
DIBXIX_clean		0	0					0.674196	0.715497	0.0735204	0.704229	0.0848374	0.0410445	0.177428	0	0					-5.14369	-4.53409	2.94531	0.336177	0.39197	0.0611581	0.339752	0.101584	0.0669409	0.17483	0	0				10.749	10.7583	11.8902	70.1452	78.0153	61.0287	1129.87		DIBXIX_clean
DIBXOD_clean		0	0					0.658602	0.673754	0.0750604	0.694666	0.0833652	0.047674	0.158827	0	0					-18.0149	-13.9351	-6.59328	1.24817	1.28302	0.802091	1.26932	0.281331	0.178156	0.499472	0	0				10.676	10.7356	11.964	69.9907	77.5612	60.8396	1123.18		DIBXOD_clean
DICKEH_clean		2327.46	4454.71					0.193225	0.0789655	0.0531663	0.226396	0.0483574	0.048517	0.0475414	2372.96	4541.86					0.824721	0.842246	1.17035	0.10313	0.0697664	0.0729109	0.112223	0.0473891	0.0468726	0.0500287	2312.8	4553.84				18.831	18.8306	20.9676	63.3185	63.3188	60.0011	5505.9		DICKEH_clean
DICVAO_clean		0	0					0.269677	0.405272	0.289355	0.254246	0.0635641	0.0622746	0.0709495	0	0																				8.188	16.5884	26.736	90	90	100.939	3565.46		DICVAO_clean
DICVES_clean		0	0					0.273615	0.381247	0.297095	0.261221	0.0608079	0.0583061	0.0751366	759.498	681.941																				8.24	16.5763	26.692	90	90	100.849	3580.66		DICVES_clean
DICVIW_clean		0	0					0.256992	0.445043	0.2638	0.235971	0.0605922	0.0585764	0.072137	0	0					-16.9378	-0.367979	-1.87013	0.39737	0.811557	0.585898	0.347858	0.159444	0.144468	0.245212	0	0				8.079	16.6038	26.8	90	90	101.193	3526.63		DICVIW_clean
DIDBAV_clean		1315.57	1421.54					0.115052	0.188996	0.219381	0.105526	0.066233	0.0562152	0.126339	1314.42	1420.26					-0.29618	-1.76947	-1.76859	0.144044	0.265193	0.242072	0.130172	0.0717435	0.063069	0.12379	1259.79	1309.65				12.695	22.69	22.69	90	90	90	6535.84		DIDBAV_clean
DIDBEZ_clean		1331.37	1433.06					0.0952474	0.153835	0.155714	0.0882279	0.0659133	0.0579924	0.113439	1313.61	1413.99					-0.366807	-1.52162	-1.52207	0.146978	0.265362	0.237024	0.13356	0.0729113	0.0641671	0.125377	1281.07	1332.36				12.732	22.614	22.614	90	90	90	6511.06		DIDBEZ_clean
DIDDOK_clean		2452.39	4663.74					0.141084	0.0809545	0.0947094	0.14928	0.0631612	0.0648764	0.0505311	2360.57	4488.84					-0.294167	-0.295397	0.301435	0.143272	0.0936948	0.09821	0.150225	0.0631228	0.0651053	0.0485239	2356.33	4478.93				16.249	16.2491	22.9895	73.1215	73.1211	66.2935	5212.88		DIDDOK_clean
DIGFAC_clean	occupancy	0	0					1.62526	1.66904	0.954568	1.63558	0.789124	0.794055	0.701717	0	0					-7.35388	13.7102	10.7985	2.46652	1.41638	1.48291	2.57453	0.809563	0.827792	0.486416	NA	NA				9.687	13.351	13.4082	90	93.0696	90	1731.61		DIGFAC_clean
DIHVIB01_clean		1870.64	2121.55					0.0981184	0.151128	0.00856153	0.082808	0.0301784	0.0341504	0.0195862	1905.25	2160.87					1.34667	1.36111	1.34135	0.0986095	0.157717	0.0442355	0.0758526	0.0381068	0.0397553	0.0337109	1930.14	2278.87				26.317	26.317	26.317	90	90	90	18226.7		DIHVIB01_clean
DIHVIB_clean		1783.93	2020.14					0.144443	0.178719	0.0481328	0.139343	0.0683583	0.0458264	0.128443	1866.66	2113.73					1.70092	1.71271	1.7013	0.106612	0.178203	0.00344809	0.0837128	0.0663404	0.0441499	0.125515	1862.92	2219.34				26.303	26.303	26.303	90	90	90	18197.7		DIHVIB_clean
DIHYUP_clean	occupancy	0	0					0.401116	0.789596	0.115544	0.332835	0.191588	0.147834	0.46421	0	0					1.2875	1.5537	1.49616	0.361761	0.675166	0.384873	0.300543	0.12578	0.0957266	0.313036	0	0				27.798	16.2	19.1292	90	98.3381	90	8523.35		DIHYUP_clean
DIKJUD_clean		805.978	754.578					0.207054		0.0496869	0.209368	0.0734657	0.0676152	0.17585	721.241	675.245					-1.2932	-4.9887	-4.80668	0.387969		0.0682022	0.392671	0.109266	0.103864	0.20381	0	0				21.296	9.382	18.803	90	90	90	3756.82		DIKJUD_clean
DIKPOD_clean		0	0					1.11985	1.35526	0.880953	1.00258	0.303639	0.0569344	0.651927	0	0					-13.3849	-10.5445	-8.53682	2.22907	1.99674	1.52623	2.46214	0.502856	0.173153	0.96832	0	0				7.051	14.598	10.6214	90	108.044	90	1039.5		DIKPOD_clean
DILXED_clean		0	0					0.25505	0.369628	0.185974	0.25091	0.0688835	0.066016	0.0872105	0	0					-3.78461	-1.66029	-2.11603	0.243983	0.312005	0.125297	0.243972	0.0833307	0.0866794	0.061928	0	0				12.255	13.57	38.2322	97.4436	90	90	6304.45		DILXED_clean
DIMDAG_clean		0	0					0.415463	0.375137	0.227861	0.432967	0.0651929	0.0448786	0.150212	0	0					-5.46582	-3.06835	-11.9177	0.318072	0.320814	0.328195	0.317011	0.0838378	0.0746375	0.122343	0	0				15.304	15.5717	16.3517	104.721	105.152	101.63	3484.69		DIMDAG_clean
DIMJUG_clean		0	0					0.444164	0.364614	0.302354	0.484165	0.0629078	0.0386535	0.118603	0	0					-24.9426	-3.32722	-0.449561	0.695581	0.945661	0.615582	0.615553	0.190164	0.162711	0.253205	0	0				9.214	13.0259	18.5962	72.347	75.6562	69.2875	1964.5		DIMJUG_clean
DIMKER_clean		0	0					0.313743	0.353236	0.31096	0.299634	0.0688526	0.0390063	0.135178	0	0					-22.8899	-20.5818	8.55201	1.45604	1.46825	1.42978	1.45399	0.290709	0.218305	0.451607	0	0				9.224	13.0417	18.6388	72.1026	75.6739	69.2902	1971.41		DIMKER_clean
DIMKIV_clean		0	0					0.281878	0.384923	0.282177	0.24601	0.0661116	0.0369886	0.128375	0	0					-1.10827	-24.3053	6.6309	0.704397	0.94834	0.715029	0.618622	0.190553	0.16188	0.251856	0	0				24.191	9.147	18.9567	90	114.25	90	3824.52		DIMKIV_clean
DIMKUH_clean		0	0					0.441099	0.371887	0.295077	0.477871	0.0618368	0.0370659	0.118718	0	0					-24.8162	-2.49825	-0.095869	0.694868	0.953754	0.601491	0.61294	0.189083	0.159328	0.25741	0	0				9.182	12.9847	18.4623	72.0635	75.6013	69.2942	1934.61		DIMKUH_clean
DIMQIB_clean	occupancy	1697.35	1591.19					0.614508	0.293116	0.11702	0.667999	0.540503	0.581785	0.139156	0	0					-4.79536	-4.35969	-2.68462	1.50199	1.09562	1.05828	1.56407	0.329011	0.349725	0.127624	0	0				47.4	9.611	17.8053	90	92.2113	90	8105.37		DIMQIB_clean
DIMQOH_clean		0	0					0.151079		0.0112387	0.166062	0.0910286	0.0611915	0.165622	0	0					-8.75171	-8.75105	0.499812	0.194925		0.0297121	0.212627	0.117822	0.0910928	0.184645	0	0				10.584	10.584	12.225	90	90	112.856	1261.93		DIMQOH_clean
DINNIZ_clean		1172.69	1003.42					0.511467	0.464503	0.462516	0.528382	0.109794	0.0738805	0.20372	1314.33	1124.61					-4.54505	-4.4968	-6.11628	0.267463	0.229527	0.244066	0.279973	0.136389	0.133377	0.144268	703.91	515.461				13.606	14.368	23.1594	91.7172	90	90	4525.42		DINNIZ_clean
DIPLUL_clean		623.575	164.226																collapse																									DIPLUL_clean
DIPMAS_clean		1310.82	764.812					1.61992	1.4713	1.17949	1.84194	0.226104	0.156218	0.305974	1257.05	733.451																				11.097	13.402	15.9311	65.126	69.6197	90	1984.85		DIPMAS_clean
DIQVUW01_clean		1365.53	1452.99					0.423593		1.2547	0.406278	0.107994	0.0667424	0.823021	1327.67	1412.73					1.11665	-0.356048	-1.60057	0.36303		1.35195	0.342427	0.110439	0.0691902	0.82542	1332.61	1409.21				25.469	15.391	17.1444	90	98.7904	90	6641.55		DIQVUW01_clean
DIQVUW_clean		1365.58	1453.26					0.342808		1.31556	0.322542	0.107051	0.0662582	0.814128	1325.09	1410.23					1.27714	-0.359376	-0.944568	0.335852		1.30818	0.315595	0.107395	0.0672139	0.803866	1345.33	1433.65				25.471	15.388	17.1511	90	98.8274	90	6642.71		DIQVUW_clean
DIRBIP_clean	metalvsorganic	0	0					0.316434	0.355478	0.174142	0.296257	0.0265505	0.0250132	0.0279781	0	0					-15.7022	-21.2102	-6.38627	1.53901	1.62344	1.12742	1.57331	0.403854	0.371858	0.433565	0	0				8.7	18.146	9.08707	90	107.278	90	1369.84		DIRBIP_clean
DIRPIF_clean		1607.09	1853.48					0.490542	0.559687	0.430495	0.486532	0.0582449	0.057651	0.066559	1523.08	1756.54					2.06647	-1.97292	0.377737	0.523206	0.753039	0.614427	0.504493	0.0683173	0.0682917	0.0686749	1478.27	1689.05				16.158	18.1704	18.955	99.1903	106.281	116.339	4518.78		DIRPIF_clean
DISSUU_clean	metalvsorganic	0	0					0.807892	0.659255	0.584421	1.03099	0.0429709	0.0147263	0.0876916	569.937	305.455					-6.58317	-9.40446	-9.57042	2.39973	2.13556	1.48707	2.93682	0.656205	0.578712	0.778902	0	0				8.455	10.0616	12.8222	109.013	90.9205	91.2985	1030.7		DISSUU_clean
DITJIB_clean		1766.95	3388.73					0.328573	0.382935	0.264086	0.323175	0.0763038	0.0572209	0.1497	1815.9	3482.62					1.87595	2.21055	-2.06688	0.35926	0.424301	0.361544	0.349996	0.0833608	0.0630194	0.161597	1795.67	3457.04				21.04	21.04	24.999	65.1138	65.1138	90	8893.48		DITJIB_clean
DITJOH_clean		1801.11	4013.64					0.303469	0.427141	0.305886	0.285924	0.0762388	0.054653	0.159261	1846.01	4113.62					2.84561	2.84611	-0.885538	0.309832	0.463343	0.403207	0.284864	0.0803225	0.0551645	0.177084	1824.39	4168.79				19.936	19.936	25.3966	66.8903	66.8903	90	8396.01		DITJOH_clean
DITPED_clean	occupancy	1034.41	799.526												NA	NA					1.20873	1.95651	-3.39293	0.827956	0.472681	0.900028	0.839623	0.587741	0.595247	0.46952	622.486	479.634												DITPED_clean
DITSIK_clean		0	0					1.23659	1.55686	1.58182	1.0585	0.210084	0.0370924	0.622604	0	0					-14.4591	-10.7344	-23.5262	1.70783	2.02821	2.39172	1.48351	0.48178	0.284362	0.952545	0	0				10.224	11.217	11.3303	69.059	76.9313	88.6667	1179.76		DITSIK_clean
DITTEH_clean		1727.18	1598.8					0.421675	0.434266	0.653084	0.396918	0.0763691	0.04904	0.175437	1550.34	1435.11					-2.35577	-4.20491	2.82412	0.279196	0.334102	0.59623	0.234152	0.0766181	0.060567	0.134803	1498.74	1334.35				18.478	12.181	23.055	90	90	90	5189.23		DITTEH_clean
DITXOU_clean		0	0					1.04559	1.34128	0.625056	0.997953	0.194643	0.0794096	0.770811	1936.71	1791.56					-10.4889	4.08623	-21.9342	1.52395	2.2904	0.712926	1.38302	0.736048	0.591815	1.45721	0	0				11.584	14.742	11.6195	90	102.319	90	1938.59		DITXOU_clean
DITYAH_clean		0	0					0.296684		0.092106	0.299607	0.0732199	0.0634847	0.248454	0	0					-2.76103	-3.77114	-4.72	0.226394		0.074497	0.228564	0.11427	0.108238	0.222845	0	0				10.297	15.751	18.771	90	90	90	3044.43		DITYAH_clean
DITYEM_clean		0	0					0.119912		0.136254	0.118701	0.0487197	0.0491262	0.0467551	0	0					-3.93915	2.02819	-0.721881	0.0862365		0.139334	0.0823034	0.0584222	0.0572863	0.0639125	0	0				5.279	15.467	8.29521	90	92.5496	90	676.636		DITYEM_clean
DITYOW_clean		362.656	254.079					0.429984	0.549127	0.000934269	0.438655	0.0570486	0.0506059	0.0957053	476.048	333.514					2.92764	3.76797	-20.4022	0.547931	0.457871	0.0133656	0.580416	0.140022	0.136266	0.162557	399.181	237.76				24.074	24.074	5.102	90	90	90	2956.9		DITYOW_clean
DIVGIA_clean		498.588	413.966					0.131174		0.0487553	0.135589	0.0782691	0.0867527	0.0344371	0	0					0.468895	0.468116	0.907546	0.123232		0.0790002	0.125602	0.0738298	0.081743	0.0329447	441.25	373.161				12.839	12.8388	64.382	90	90	119.998	9190.93		DIVGIA_clean
DIVMUR_clean	metalvsorganic	0	0					2.11057	2.09325	2.32264	2.09832	0.389658	0.244183	0.501188	854.706	377.017					-28.1114	-17.4869	21.7705	3.16516	3.18006	3.07012	3.16114	0.932945	0.844771	1.00055	0	0				8.754	15.873	9.46553	90	99.8853	90	1295.73		DIVMUR_clean
DIVNAY_clean	metalvsorganic	0	0					1.55672	1.5959	1.89391	1.44828	0.431784	0.253164	0.568726	660.242	356.552					-25.9582	-12.1496	7.11108	2.38228	2.29522	1.9316	2.57347	0.713435	0.466053	0.903094	0	0				8.775	15.88	9.50725	90	99.8537	90	1305.26		DIVNAY_clean
DIVNIH_clean	metalvsorganic	0	0					2.13865	2.06034	2.09045	2.28667	0.615791	0.203153	0.906513	0	0					-24.4669	-15.6831	3.43481	2.02559	2.03038	2.14441	1.98343	1.30001	1.30027	1.29983	0	0				7.065	11.2774	11.8321	67.3696	80.0375	82.8227	855.248		DIVNIH_clean
DIVPUU_clean		1036.13	772.16					0.201051		0.140934	0.204391	0.0678286	0.0727044	0.0446686	1019.67	759.872					-3.38939	-3.37922	1.66287	0.244965		0.0411676	0.256287	0.0747605	0.0848717	0.0267326	956.667	676.19				10.816	10.8161	9.748	90	90	120	987.606		DIVPUU_clean
DIVQAB_clean		0	0					0.0905563		0.0338206	0.0937083	0.0588962	0.0636992	0.0360819	0	0					-2.30158	1.47896	-1.99897	0.134895		0.0822798	0.137818	0.0669293	0.0703729	0.0505722	0	0				17.236	9.184	15.478	90	90	90	2450.1		DIVQAB_clean
DIVSUY_clean		1471.11	1195.24					0.449996	0.357866	0.179877	0.487401	0.0670629	0.041937	0.143763	0	0					-4.01007	0.827581	-0.689304	0.209371	0.300396	0.274181	0.1816	0.087799	0.0672566	0.150507	1336.58	1048.4				24.633	13.038	14.7252	90	96.6882	90	4697.04		DIVSUY_clean
DIWMON_clean		1545.33	1669.86					0.323002	0.432213	0.523497	0.301792	0.0783984	0.0496264	0.18283	1605.05	1734.4					-0.322271	-9.7717	2.67569	0.329906	0.4346	0.545062	0.308764	0.110038	0.0829645	0.208307	1455.77	1452.65				27.306	19.435	31.177	90	90	90	16545.4		DIWMON_clean
DIWMUT_clean	occupancy	1720	2050.65					0.954553	0.978176	1.04211	0.946892	0.239024	0.196661	0.39307	1512.49	1803.17					-53.2381	1.88593	0.261364	2.29307	1.84195	1.67674	2.39139	0.821562	0.723573	1.17789	0	0				43.986	14.189	26.3613	90	107.284	90	15709.6		DIWMUT_clean
DIWNAA_clean		3112.16	4769.5					0.134208	0.147432	0.149443	0.13137	0.0515314	0.046186	0.0929577	3030.55	4644.53					-0.535874	-0.80598	-0.832349	0.0954006	0.113837	0.0754955	0.0931573	0.0555225	0.0516195	0.0857705	3039.75	4556.49				8.59	17.445	17.444	120	90	90	2263.81		DIWNAA_clean
DIXKOL_clean		1111.54	786.14					0.260578	0.278036	0.185639	0.263285	0.0666736	0.0410505	0.113527	1183.64	837.199					-3.50258	-3.5007	-1.69555	0.220883	0.225	0.158696	0.226863	0.0846031	0.0606455	0.128411	1073.86	700.088				11.158	11.2607	11.4241	76.7614	65.8166	80.6782	1270.87		DIXKOL_clean
DIXNUV01_clean		0	0					0.468995		0.000353334	0.478758	0.0551851	0.0406901	0.178392	0	0					-3.39401	3.20753	-1.66082	0.293455		0.00280398	0.29951	0.0771997	0.0655052	0.176603	0	0				8.02	20.455	8.61155	90	90.652	90	1412.63		DIXNUV01_clean
DIYKAZ_clean		0	0					0.124848	0.185209	0.10237	0.116738	0.0561362	0.0563485	0.0551806	0	0					-0.777123	-0.787328	-1.52532	0.12359	0.178311	0.107385	0.116083	0.0641502	0.0652124	0.0593704	0	0				16.355	16.003	12.1024	90	111.401	90	2949.15		DIYKAZ_clean
DIYKED_clean		257.317	156.119					0.0955813	0.0667575	0.0617444	0.0993096	0.057243	0.0601207	0.0379219	101.567	61.6247					-3.33318	-0.950716	0.865287	0.0941881	0.0597769	0.0547117	0.0986161	0.0592342	0.0608932	0.048095	0	0				6.712	24.876	14.065	90	90	90	2348.4		DIYKED_clean
DIYTEM_clean		1084.68	852.758					0.48712	0.455882	0.334518	0.496475	0.0620597	0.0520839	0.115008	1220.66	959.636					-1.23486	-5.42155	-1.86807	0.203258	0.241899	0.313292	0.194498	0.0839894	0.0810214	0.0997429	696.088	498.613				13.329	16.202	20.2829	90	99.4953	90	4320.21		DIYTEM_clean
DIYWIT_clean		0	0					0.246876	0.274019	0.26907	0.242032	0.0636297	0.0530441	0.116558	0	0					-8.3555	-6.36499	-2.39958	0.323422	0.518719	0.503416	0.287822	0.120655	0.120193	0.122967	0	0				11.128	14.055	22.9788	90	103.992	90	3487.34		DIYWIT_clean
DIZQOT_clean	occupancy	0	0					0.317223	0.169626	0.162757	0.345664	0.0605585	0.0518962	0.103004	0	0					-2.7554	-1.99936	-0.636051	0.225189	0.166905	0.116882	0.238673	0.0720325	0.0676406	0.0935528	0	0				13.864	18.941	19.008	90	90	90	4991.46		DIZQOT_clean
DIZVAK_clean	occupancy	1884.53	1629.71					0.915071	0.630068	0.308245	0.984945	0.761868	0.79807	0.182644	1380.14	1193.46					-0.32906	-0.32906	8.42882	0.928553	0.570655	0.279479	1.01178	0.749387	0.783587	0.202188	1495.58	1393.15				15.164	15.164	19.043	90	90	90	4378.88		DIZVAK_clean
DOCKOW_clean		653.366	471.7					0.509932	0.432982	0.211022	0.540608	0.063566	0.0554501	0.101676	730.034	527.064					-5.72962	-2.89801	-2.6552	0.499263	0.552163	0.517171	0.487659	0.0938703	0.0981625	0.0737155	444.687	285.116				10.426	14.962	21.1022	100.009	93.5401	106.898	3079.65		DOCKOW_clean
DOCVEX_clean	occupancy	1449.58	439.091												NA	NA															NA	NA												DOCVEX_clean
DODHUA_clean		0	0					0.741702	0.647804	0.583088	0.766163	0.0631489	0.0488374	0.140073	0	0					-1.07284	-3.55996	-7.83097	0.615926	0.694911	0.423301	0.613463	0.103554	0.0984268	0.131116	0	0				7.31	12.2676	13.8908	82.9596	80.9499	72.8959	1171.91		DODHUA_clean
DODMIT_clean		1070.19	686.652					0.239059	0.263266	0.224381	0.231805	0.0504031	0.0463289	0.0634403	1069.41	686.173					-1.65766	1.78407	0.0954332	0.23492	0.340819	0.175806	0.202904	0.0506298	0.0531232	0.0426511	1031.1	664.427				10.738	10.7619	18.5474	105.928	90	119.926	1762		DODMIT_clean
DOFTID_clean	occupancy	2546.08	2787.32					1.7397	0.886875	1.35713	1.85903	0.771145	0.747442	0.855797	2298.46	2516.24					-1.12802	22.3865	10.0106	1.19872	0.70729	1.19942	1.25484	0.719525	0.65212	0.96026	2518.7	3670.57				24.574	26.507	15.152	90	90	90	9869.76		DOFTID_clean
DOFTOJ_clean	occupancy	2606.2	3035.35					0.886275	0.550567	0.338889	0.955921	0.511642	0.423383	0.805841	2291.11	2668.34					0.422908	3.17784	0.981497	0.865491	0.547922	0.435157	0.926375	0.497301	0.40834	0.793837	2522.86	3074.37				23.953	25.725	14.814	90	90	90	9128.25		DOFTOJ_clean
DOGBAE_clean	occupancy	1453.78	2623.82												NA	NA															NA	NA												DOGBAE_clean
DOGMET_clean		0	0					1.11547	1.20015	0.807028	1.11765	0.182867	0.143642	0.362648	492.957	272.828					-4.50834	-1.91282	-14.0595	0.854632	0.980041	0.71482	0.845175	0.238123	0.210096	0.366581	0	0				13.302	13.3517	19.8941	95.6293	104.8	117.751	2924.26		DOGMET_clean
DOGZIJ_clean		0	0					0.30669	0.18358	0.169904	0.321151	0.0592742	0.0615459	0.0359894	0	0					-2.82745	-1.47922	1.19057	0.142398	0.147819	0.180806	0.140835	0.0677568	0.0701685	0.0430359	0	0				8.473	10.1543	13.3973	68.2085	78.6396	77.4583	1036.11		DOGZIJ_clean
DOHNUL_clean		528.82	389.932					0.243158	0.347031	0.350969	0.225694	0.0608635	0.0488482	0.131453	551.623	406.757					-0.581901	-4.98271	-0.0756534	0.212054	0.37753	0.343851	0.18577	0.0732171	0.0646073	0.1238	403.608	280.734				10.586	28.043	17.4485	90	92.079	90	5176.41		DOHNUL_clean
DOHXUV_clean		0	0					0.171687		0.549367	0.156166	0.0623823	0.0585731	0.104828	0	0					-4.87437	1.04158	0.191842	0.178777		0.510494	0.165144	0.0634022	0.0588545	0.114077	0	0				22.666	18.866	24.6039	90	107.228	90	10049		DOHXUV_clean
DOHYIJ01_clean		0	0					0.216077	0.187894	0.256136	0.222133	0.0683674	0.0474491	0.105423	0	0					-1.71237	-0.976189	-1.2804	0.231269	0.186726	0.272981	0.242641	0.0763937	0.0601564	0.105157	0	0				9.241	9.55407	21.603	90	90	116.152	1712.06		DOHYIJ01_clean
DOHYIJ_clean		0	0					0.246644	0.184361	0.265741	0.265814	0.0748374	0.0584829	0.107546	0	0					2.02829	-4.80923	-0.712765	0.222467	0.175945	0.264912	0.234437	0.0706783	0.0581794	0.0956761	0	0				9.226	9.559	21.606	90	90	116.144	1710.51		DOHYIJ_clean
DOJXIK_clean		0	0					0.489003	0.458586	1.07482	0.474733	0.175764	0.0533682	0.567432	467.3	288.347					-3.10631	-3.98108	-6.74919	0.395857	0.402588	1.21498	0.359483	0.222446	0.103991	0.601499	0	0				9.528	14.692	13.677	90	90	90	1914.58		DOJXIK_clean
DOJXOQ_clean		0	0					0.425071	0.353803	0.612553	0.441015	0.0821227	0.0506356	0.182881	0	0					-2.04764	-1.27938	-4.76317	0.449542	0.34308	0.663172	0.476127	0.109125	0.078289	0.207801	0	0				9.505	14.624	13.56	90	90	90	1884.86		DOJXOQ_clean
DOJXOR_clean	occupancy	1349.24	1319.12					0.572841	0.596629	0.361542	0.575873	0.541412	0.55668	0.209347	1123.47	1098.36					1.42305	-0.326328	3.18676	0.516752	0.549155	0.373779	0.518199	0.419658	0.427186	0.25592	1365.58	1402.95				18.706	22.983	17.7139	90	105.867	90	7325.4		DOJXOR_clean
DOJXUW_clean		0	0					0.432004	0.35819	0.599556	0.449627	0.0790016	0.0499293	0.172033	0	0					-1.97115	-1.13667	-4.58922	0.453089	0.351106	0.645365	0.479072	0.104093	0.0770405	0.190661	0	0				9.511	14.613	13.532	90	90	90	1880.73		DOJXUW_clean
DOJYAD_clean		0	0					0.434488	0.34459	0.585065	0.45818	0.0852715	0.0607326	0.163796	0	0					-1.26554	-0.496547	-3.71862	0.475992	0.353542	0.601431	0.511582	0.0963117	0.0771841	0.15752	0	0				9.43	14.48	13.306	90	90	90	1816.89		DOJYAD_clean
DOKBUC_clean		0	0					0.20214	0.180537	0.162531	0.205641	0.0635503	0.0578579	0.104346	0	0					-2.39452	-3.1898	-1.5734	0.155225	0.121496	0.0710044	0.161313	0.0795003	0.0808276	0.069988	0	0				9.021	13.841	30.183	90	90	90	3768.64		DOKBUC_clean
DOKDEN_clean		1661.66	2333.35					0.207214	0.146343	0.0357652	0.221046	0.0640916	0.0608608	0.0846509	1606.93	2256.42					0.501206	1.26773	1.25734	0.127409	0.118187	0.0235739	0.1321	0.059537	0.0573287	0.0735898	1634.61	2364.98				9.864	24.0587	24.059	61.8358	82.1451	97.8549	4852.22		DOKDEN_clean
DOKHIV_clean		440.729	294.836					0.591883	0.414991	0.313312	0.65195	0.0613727	0.0524814	0.0880466	693.605	464.029																				6.668	17.1109	17.8061	74.8343	79.2083	78.7643	1903.23		DOKHIV_clean
DOKHOB_clean		0	0					0.635002	0.817574	0.353439	0.618586	0.0968817	0.0654399	0.234083	377.786	289.433					0.200054	-1.68333	-0.163197	0.164386	0.205627	0.0721412	0.161726	0.0727763	0.0709977	0.0805374	0	0				8.558	18.802	16.0537	99.4688	90	90	2547.97		DOKHOB_clean
DOKHUH_clean		0	0					0.382087	0.731929	0.968069	0.347376	0.0923186	0.0677438	0.334556	0	0					0.304828	-9.37719	-8.27855	0.645018	0.786932	1.22147	0.620351	0.153612	0.125351	0.432188	0	0				14.5	18.577	15.3942	90	103.969	90	4024.05		DOKHUH_clean
DOLPIF_clean		0	0					0.164756	0.171971	0.153861	0.162805	0.0509766	0.0482964	0.0595531	0	0					-2.23701	-2.44047	-2.35258	0.205625	0.157563	0.214711	0.221267	0.0771387	0.0716652	0.0946539	0	0				11.046	11.6326	16.2464	78.6899	73.8095	88.5813	1964.84		DOLPIF_clean
DOLRAZ_clean		801.118	709.127					0.110764	0.13342	0.172807	0.101085	0.0508253	0.0527758	0.043565	829.127	733.896					-1.02031	-0.403413	-1.76347	0.124387	0.159384	0.161955	0.112797	0.0531435	0.0567038	0.0398914	758.638	650.409				11.359	22.582	16.5924	90	92.1276	90	4253.16		DOLRAZ_clean
DOLWEI_clean	occupancy	1889.36	2158.94					1.18189	1.12905	0.481379	1.22334	0.203303	0.168877	0.345927	2100.56	2400.28					-8.70935	-8.70935	-8.70935	0.866318	0.843176	0.551263	0.884847	0.248818	0.293913	0.0619993	0	0				24.755	24.755	24.755	90	90	90	15170.1		DOLWEI_clean
DOLXOR01_clean		2289.41	2113.79					0.204154		0.171704	0.217675	0.0996774	0.0209498	0.1292	2319.37	2141.47					0.218405	0.201556	-0.724549	0.218821		0.176293	0.236541	0.0999917	0.0229159	0.128895	2333.36	2146.6				9.437	9.43627	16.4241	88.505	88.5033	83.7396	1452.95		DOLXOR01_clean
DOLXOR02_clean		2273.95	2107.56					0.203774		0.171996	0.217014	0.0968169	0.0197038	0.125734	2278.67	2111.83					0.0384107	0.0492037	-0.730682	0.216865		0.174843	0.234374	0.0978333	0.0227281	0.125998	2277.45	2096.31				9.45	9.45031	16.437	88.5118	88.5114	83.7977	1458.43		DOLXOR02_clean
DOLXOR_clean		2272.33	2091.4					0.202808		0.171308	0.215933	0.0963758	0.0166425	0.126276	2291.01	2108.55					0.389405	0.405953	-0.752301	0.219761		0.176978	0.237587	0.0973915	0.0175167	0.127345	2283.65	2101.28				9.427	9.42723	16.4029	88.5202	88.5188	83.7947	1448.32		DOLXOR_clean
DOMCUE_clean		1329.03	1937.72					0.988225	1.23736	0.81751	0.957511	0.0379418	0.018741	0.172348	1229.87	1793.16					-6.19162	-6.19771	-8.38656	0.870575	1.18198	0.784715	0.828542	0.122842	0.126097	0.100055	1336.95	1545.01				27.92	27.92	30.6693	62.9236	62.9236	90	18295.5		DOMCUE_clean
DOMDAL_clean		1291.29	1946.79					0.834632	1.10002	0.593625	0.804466	0.0581268	0.04357	0.164877	1229.31	1853.34					-5.13024	-5.1334	-5.31985	0.431831	0.83029	0.222388	0.382307	0.116108	0.108806	0.169655	1308.56	1681.08				28.486	28.486	46.678	90	90	90	37877		DOMDAL_clean
DOMFUI_clean		604.316	511.944					0.25655	0.254609	0.474452	0.245496	0.0799551	0.0421316	0.185082	635.3	538.185					-0.277414	-0.389286	-7.07982	0.233969	0.208147	0.428022	0.22741	0.0939961	0.0621605	0.182481	574.971	458.816				32.803	35.013	11.4788	90	110.197	90	12373.1		DOMFUI_clean
DOMGAP_clean	occupancy	609.604	506.244					0.150904	0.289601	0.406478	0.116913	0.0991655	0.0641409	0.195733	624.339	518.476					-0.669065	-0.340498	-6.70339	0.258741	0.304176	0.377169	0.245803	0.112723	0.0851917	0.188629	570.653	446.756				32.912	34.773	11.5103	90	109.959	90	12381.7		DOMGAP_clean
DOMGET_clean		622.467	521.165					0.195884	0.203713	0.45189	0.181518	0.0780721	0.0421031	0.178045	637.079	533.373					-5.44882	-0.303826	-0.444246	0.198977	0.179223	0.426491	0.189852	0.0880802	0.0577796	0.172298	588.354	466.956				11.492	23.928	23.9279	93.5572	103.365	103.365	6181.62		DOMGET_clean
DOMKEX_clean		853.765	757.826					0.426304	0.51555	0.655706	0.392563	0.123044	0.0463911	0.260568	910.162	807.903					-8.33856	-0.303972	-5.11572	0.431147	0.397422	0.39723	0.439758	0.110702	0.103189	0.124181	332.971	256.918				6.406	16.3505	17.8194	98.1106	94.0547	95.651	1831.99		DOMKEX_clean
[truncated: 10,896 more rows]
